# Supplementary material for: Extensive inheritance of gut microbial communities in a superorganismal termite
Source: Research Square preprint supplement (doi:10.21203/rs.3.rs-1978279/v1), 2022-08-30
Supplement: Supplementary file 1 [file f1e595f93f4f9d29aced57d3.xlsx]

## Sheet: Supp. Table 3
Supplemental Table 3. The number of ASVs with complete vertical transmission (both Step 1 and Step 2). ASVs that were pedigree-specific and all vertically transmitted ASVS in each pedigree are listed, corresponding to Fig. 3c.
Genus	Family	Order	Class	Phylum	Inherited in all pedigrees	Pedigree-specific inheritance in all pedigrees	Yellow specific	Yellow nonspecific	Red specific	Red nonspecific	Green specific	Green nonspecific	Blue specific	Blue nonspecific	Ubiquitous
3M1PL1-52_termite_group_Unclassified	3M1PL1-52_termite_group	Bacteroidales	Bacteroidia	Bacteroidetes	Yes	Yes	18	7	18	4	3	5	3	5	NA
Absconditabacteriales_(SR1)_Unclassified	NA	Absconditabacteriales_(SR1)	Gracilibacteria	Patescibacteria	No	No	NA	NA	NA	NA	NA	NA	3	3	NA
Aggregicoccus	Myxococcaceae	Myxococcales	Deltaproteobacteria	Proteobacteria	No	No	NA	NA	9	17	NA	4	NA	8	NA
Alisitpes_IV	Rikenellaceae	Bacteroidales	Bacteroidia	Bacteroidetes	Yes	Yes	97	199	38	119	178	292	68	155	2
Alistipes	Rikenellaceae	Bacteroidales	Bacteroidia	Bacteroidetes	No	No	2	3	NA	2	2	3	NA	NA	NA
Alistipes_II	Rikenellaceae	Bacteroidales	Bacteroidia	Bacteroidetes	Yes	Yes	277	502	125	328	412	738	115	371	25
Alistipes_III	Rikenellaceae	Bacteroidales	Bacteroidia	Bacteroidetes	Yes	Yes	20	52	13	54	12	51	8	39	10
Alphaproteobacteria_Unclassified	NA	NA	Alphaproteobacteria	Proteobacteria	No	No	4	NA	2	NA	NA	NA	3	2	NA
Anaerotruncus	Ruminococcaceae	Clostridiales	Clostridia_1	Firmicutes	No	No	6	6	NA	NA	NA	NA	NA	NA	NA
Arcobacter	Campylobacteraceae	Campylobacterales	Epsilonproteobacteria	Proteobacteria	Yes	No	2	18	NA	5	NA	14	2	20	NA
Arthropod_cluster	Clostridiaceae_1	Clostridiales	Clostridia_1	Firmicutes	Yes	Yes	93	294	79	356	82	356	56	275	76
Bacteroidales_UCG-001_Unclassified	Bacteroidales_UCG-001	Bacteroidales	Bacteroidia	Bacteroidetes	Yes	No	3	12	6	12	NA	9	NA	22	NA
Bacteroidales_Unclassified	NA	Bacteroidales	Bacteroidia	Bacteroidetes	Yes	Yes	19	36	7	23	5	16	18	38	NA
Bacteroides	Bacteroidaceae	Bacteroidales	Bacteroidia	Bacteroidetes	Yes	Yes	19	17	2	2	2	2	3	3	NA
BCf9-17_termite_group	Rikenellaceae	Bacteroidales	Bacteroidia	Bacteroidetes	Yes	Yes	2	16	3	21	7	52	8	48	3
Blattabacterium	Blattabacteriaceae	Flavobacteriales	Bacteroidia	Bacteroidetes	No	No	NA	NA	NA	NA	NA	NA	2	2	NA
Bosea	Bradyrhizobiaceae	Rhizobiales_2	Alphaproteobacteria	Proteobacteria	Yes	No	2	4	NA	NA	NA	2	NA	3	NA
Bradymonadales_Unclassified	NA	Bradymonadales	Deltaproteobacteria	Proteobacteria	No	No	3	NA	NA	NA	NA	NA	8	9	NA
Butyricimonas	Porphyromonadaceae_Gut_group	Bacteroidales	Bacteroidia	Bacteroidetes	Yes	No	2	3	5	7	NA	5	NA	4	NA
Candidatus_Ancillula_trichonymphae	Termite_cluster_1	Actinomycetales	Actinobacteria	Actinobacteria	Yes	Yes	14	26	5	9	10	22	2	5	3
Candidatus_Arthromitus	Lachnospiraceae	Clostridiales	Clostridia_1	Firmicutes	Yes	Yes	28	83	34	89	34	109	5	72	16
Candidatus_Captivus	Candidatus_Captivus	Rickettsiales	Alphaproteobacteria	Proteobacteria	Yes	No	NA	2	NA	4	NA	4	5	3	NA
Candidatus_Hepatincola	Candidatus_Hepatincola	Rickettsiales	Alphaproteobacteria	Proteobacteria	No	No	NA	NA	NA	NA	2	2	2	2	NA
Candidatus_Pacebacteria_Unclassified	NA	Candidatus_Pacebacteria	Microgenomatia	Patescibacteria	No	No	NA	NA	2	2	NA	2	NA	2	NA
Candidatus_Saccharimonas	Saccharimonadaceae	Saccharimonadales	Saccharimonadia	Patescibacteria	Yes	Yes	19	38	24	31	27	33	25	20	5
Candidatus_Symbiothrix	Dysgonomonadaceae	Bacteroidales	Bacteroidia	Bacteroidetes	No	No	3	4	NA	NA	NA	2	NA	NA	NA
Candidatus_Tammella	Synergistaceae	Synergistales	Synergistia	Synergistetes	Yes	Yes	6	54	35	119	17	87	24	94	14
Caproiciproducens	Ruminococcaceae	Clostridiales	Clostridia	Firmicutes	No	No	NA	2	2	3	NA	NA	NA	NA	NA
Catabacter	Lachnospiraceae	Clostridiales	Clostridia_1	Firmicutes	Yes	Yes	7	34	5	29	14	45	15	32	5
Christensenellaceae_R-7_group	Christensenellaceae	Clostridiales	Clostridia	Firmicutes	Yes	Yes	12	61	26	84	23	82	13	80	11
Christensenellaceae_Unclassified	Christensenellaceae	Clostridiales	Clostridia	Firmicutes	Yes	Yes	5	23	9	35	3	27	4	23	11
Clostridia_Unclassified	NA	NA	Clostridia	Firmicutes	Yes	No	NA	4	NA	3	NA	2	NA	4	2
Clostridiales_Unclassified	NA	Clostridiales	Clostridia	Firmicutes	Yes	Yes	2	12	5	22	3	19	4	18	NA
Clostridiales_vadinBB60_group_Unclassified	Clostridiales_vadinBB60_group	Clostridiales	Clostridia	Firmicutes	Yes	Yes	2	4	4	13	13	22	8	20	NA
Cluster_IV	Porphyromonadaceae_3	Bacteroidales	Bacteroidia	Bacteroidetes	Yes	No	5	7	5	7	NA	2	NA	4	NA
COB_P4-1_termite_group_Unclassified	COB_P4-1_termite_group	Bacteroidales	Bacteroidia	Bacteroidetes	Yes	No	2	7	2	20	NA	15	NA	20	NA
Dehalococcoidia_Unclassified	NA	NA	Dehalococcoidia	Chloroflexi	No	No	2	2	NA	NA	NA	NA	NA	NA	NA
Dendrosporobacter	Veillonellaceae	Clostridiales_1	Clostridia_2	Firmicutes	Yes	Yes	4	NA	4	2	3	9	15	20	NA
Desulfarculus	Desulfarculaceae	Desulfarculales	Deltaproteobacteria	Proteobacteria	No	No	NA	NA	6	7	NA	2	NA	5	NA
Desulfatiferula	Desulfobacteraceae	Desulfobacterales	Deltaproteobacteria	Proteobacteria	No	No	NA	NA	NA	NA	NA	3	NA	3	NA
Desulfobotulus	Desulfobacteraceae	Desulfobacterales	Deltaproteobacteria	Proteobacteria	Yes	No	4	17	NA	5	4	16	8	19	NA
Desulfobulbus	Desulfobulbaceae	Desulfobacterales	Deltaproteobacteria	Proteobacteria	Yes	No	3	15	NA	12	2	12	5	16	2
Desulforhopalus	Desulfobulbaceae	Desulfobacterales	Deltaproteobacteria	Proteobacteria	Yes	No	NA	11	NA	2	NA	10	6	18	NA
Desulfovibrio	Desulfovibrionaceae	Desulfovibrionales	Deltaproteobacteria	Proteobacteria	Yes	No	NA	4	NA	4	NA	3	NA	4	NA
Desulfovibrionaceae_Unclassified	Desulfovibrionaceae	Desulfovibrionales	Deltaproteobacteria	Proteobacteria	Yes	No	NA	10	NA	10	2	13	NA	11	NA
Diplosphaera	Opitutaceae	Opitutales	Verrucomicrobiae	Verrucomicrobia	No	No	NA	NA	2	2	NA	NA	NA	NA	NA
Dysgonomonas	Porphyromonadaceae_1	Bacteroidales	Bacteroidia	Bacteroidetes	Yes	Yes	11	45	16	45	13	27	39	62	NA
Elusimicrobium	Elusimicrobiaceae	Elusimicrobiales	Elusimicrobia	Elusimicrobia	No	No	2	NA	NA	NA	2	2	2	NA	NA
Endomicrobium	Endomicrobiaceae	Endomicrobiales	Elusimicrobia	Elusimicrobia	Yes	No	15	10	NA	2	20	6	5	7	NA
Enterococcus_3	Enterococcaceae	Lactobacillales	Bacilli	Firmicutes	Yes	Yes	10	7	9	NA	6	NA	6	NA	NA
Erysipelothrix	Erysipelotrichaceae	Erysipelotrichales	Erysipelotrichi	Firmicutes	No	No	2	2	NA	NA	NA	NA	NA	NA	NA
Escherichia_blattae_cluster	Enterobacteriaceae	Enterobacteriales	Gammaproteobacteria_1	Proteobacteria	No	No	NA	NA	NA	NA	NA	NA	4	NA	NA
Eubacterium_3	Family_XIII_Incertae_Sedis	Clostridiales	Clostridia_1	Firmicutes	Yes	No	3	4	2	2	NA	2	2	2	NA
F0058	Paludibacteraceae	Bacteroidales	Bacteroidia	Bacteroidetes	Yes	No	NA	4	3	12	NA	15	3	15	NA
Family_XIII_Unclassified	Family_XIII	Clostridiales	Clostridia	Firmicutes	Yes	No	3	4	NA	5	NA	5	NA	2	NA
Firmicutes_Unclassified	NA	NA	NA	Firmicutes	Yes	No	NA	6	7	14	2	NA	2	4	NA
Gastranaerophilales_Unclassified	NA	Gastranaerophilales	Melainabacteria	Cyanobacteria	No	No	2	2	NA	NA	4	4	7	2	NA
GCA-900066225	Ruminococcaceae	Clostridiales	Clostridia	Firmicutes	No	No	NA	2	NA	2	NA	2	NA	2	NA
Gut_cluster_1	Ruminococcaceae	Clostridiales	Clostridia_1	Firmicutes	No	No	4	2	3	3	NA	NA	NA	NA	NA
Gut_cluster_13	Lachnospiraceae	Clostridiales	Clostridia_1	Firmicutes	Yes	Yes	33	104	13	66	17	74	12	84	21
Gut_cluster_2	Desulfovibrionaceae	Desulfovibrionales	Deltaproteobacteria	Proteobacteria	No	No	NA	NA	NA	9	2	12	9	23	NA
Gut_cluster_3	Desulfovibrionaceae	Desulfovibrionales	Deltaproteobacteria	Proteobacteria	Yes	Yes	43	193	63	244	52	235	54	228	40
Gut_cluster_3	Ruminococcaceae	Clostridiales	Clostridia_1	Firmicutes	Yes	Yes	5	15	3	12	10	24	3	10	NA
Gut_cluster_7	Ruminococcaceae	Clostridiales	Clostridia_1	Firmicutes	No	No	2	3	3	3	5	2	NA	NA	NA
gut_cluster_c	Rikenellaceae	Bacteroidales	Bacteroidia	Bacteroidetes	Yes	Yes	2	22	2	22	5	12	2	24	NA
H1	Paludibacteraceae	Bacteroidales	Bacteroidia	Bacteroidetes	Yes	No	4	8	10	10	NA	3	NA	3	NA
Harryflintia	Ruminococcaceae	Clostridiales	Clostridia	Firmicutes	No	No	NA	2	NA	NA	4	5	2	2	NA
hoa5-07d05_gut_group	Rikenellaceae	Bacteroidales	Bacteroidia	Bacteroidetes	No	No	2	NA	NA	NA	6	7	NA	2	NA
Hydrogenoanaerobacterium	Ruminococcaceae	Clostridiales	Clostridia	Firmicutes	Yes	No	NA	4	NA	4	NA	4	NA	4	NA
Insect_cluster	Ruminococcaceae	Clostridiales	Clostridia_1	Firmicutes	Yes	Yes	58	246	115	329	83	340	46	280	22
Izimaplasmatales_Unclassified	NA	Izimaplasmatales	Mollicutes	Tenericutes	No	No	NA	NA	NA	NA	NA	NA	2	2	NA
JGI_0000069-P22_Unclassified	NA	JGI_0000069-P22	Gracilibacteria	Patescibacteria	No	No	3	3	NA	NA	NA	NA	2	NA	NA
Lachnospiraceae_NK4A136_group	Lachnospiraceae	Clostridiales	Clostridia	Firmicutes	No	No	NA	NA	NA	NA	2	2	NA	NA	NA
Lachnospiraceae_Unclassified	Lachnospiraceae	Clostridiales	Clostridia	Firmicutes	Yes	No	NA	2	NA	3	NA	2	NA	3	NA
Lactococcus	Streptococcaceae	Lactobacillales	Bacilli	Firmicutes	Yes	No	NA	3	NA	3	2	2	NA	NA	NA
Lactococcus_3	Streptococcaceae	Lactobacillales	Bacilli	Firmicutes	No	No	NA	NA	NA	NA	3	NA	NA	NA	NA
M2PB4-61_termite_group	Rikenellaceae	Bacteroidales	Bacteroidia	Bacteroidetes	No	No	NA	NA	2	2	NA	2	35	36	NA
M2PB4-65_termite_group_Unclassified	M2PB4-65_termite_group	Bacteroidales	Bacteroidia	Bacteroidetes	No	No	NA	NA	NA	2	NA	2	NA	2	NA
Margulisbacteria_Unclassified	NA	NA	NA	Margulisbacteria	No	No	NA	NA	NA	NA	NA	NA	3	2	NA
Methanimicrococcus	Methanosarcinaceae	Methanosarcinales	Methanomicrobia	Euryarchaeota	Yes	No	NA	2	NA	2	NA	2	NA	2	NA
Methanobrevibacter	Methanobacteriaceae	Methanobacteriales	Methanobacteria	Euryarchaeota	No	No	2	2	NA	NA	NA	NA	NA	NA	NA
Mixed_gut_cluster	Lachnospiraceae	Clostridiales	Clostridia_1	Firmicutes	Yes	No	2	4	2	6	NA	3	NA	4	NA
Mixed_gut_cluster	Porphyromonadaceae_Cluster_V	Bacteroidales	Bacteroidia	Bacteroidetes	No	No	3	3	NA	NA	NA	NA	3	NA	NA
Mixed_gut_cluster	Porphyromonadaceae_Gut_group	Bacteroidales	Bacteroidia	Bacteroidetes	No	No	3	3	11	11	NA	NA	NA	NA	NA
Mollicutes_RF39_Unclassified	NA	Mollicutes_RF39	Mollicutes	Tenericutes	No	No	NA	NA	NA	NA	2	4	NA	NA	NA
Mucispirillum	Deferribacteraceae	Deferribacterales	Deferribacteres	Deferribacteres	Yes	Yes	4	12	5	11	2	12	11	19	NA
Myxococcales_Unclassified	NA	Myxococcales	Deltaproteobacteria	Proteobacteria	No	No	NA	NA	NA	NA	NA	NA	2	2	NA
Odoribacter	Marinifilaceae	Bacteroidales	Bacteroidia	Bacteroidetes	No	No	NA	NA	NA	NA	10	12	NA	3	NA
Paludibacter	Paludibacteraceae	Bacteroidales	Bacteroidia	Bacteroidetes	No	No	2	NA	NA	NA	NA	NA	NA	NA	NA
Paludibacteraceae_Unclassified	Paludibacteraceae	Bacteroidales	Bacteroidia	Bacteroidetes	Yes	Yes	8	25	3	19	7	37	6	23	2
possible_genus_05	Fibrobacteraceae	Fibrobacterales	Fibrobacteria	Fibrobacteres	No	No	NA	NA	NA	3	5	17	14	6	NA
Pseudomonas	Pseudomonadaceae	Pseudomonadales	Gammaproteobacteria	Proteobacteria	No	No	2	2	2	NA	NA	NA	NA	NA	NA
Puniceicoccaceae_Unclassified	Puniceicoccaceae	Opitutales	Verrucomicrobiae	Verrucomicrobia	No	No	NA	NA	NA	NA	NA	NA	NA	2	NA
Rhodospirillales_Unclassified	NA	Rhodospirillales	Alphaproteobacteria	Proteobacteria	Yes	No	NA	3	3	2	NA	4	4	4	NA
Rikenella	Rikenellaceae	Bacteroidales	Bacteroidia	Bacteroidetes	Yes	No	NA	2	NA	2	NA	2	NA	2	NA
Rikenellaceae_Unclassified	Rikenellaceae	Bacteroidales	Bacteroidia	Bacteroidetes	No	No	NA	NA	NA	4	NA	NA	2	2	NA
Robinsoniella_Insects	Lachnospiraceae	Clostridiales	Clostridia_1	Firmicutes	Yes	No	4	3	NA	11	2	13	2	13	NA
Rs-E47_termite_group_Unclassified	Rs-E47_termite_group	Bacteroidales	Bacteroidia	Bacteroidetes	Yes	No	NA	16	NA	31	6	44	3	37	NA
Rs-K70_termite_group_Unclassified	NA	Rs-K70_termite_group	Deltaproteobacteria	Proteobacteria	Yes	Yes	13	83	34	148	16	106	42	155	NA
Rs-M47_Unclassified	NA	NA	Rs-M47	Elusimicrobia	No	No	NA	NA	2	NA	NA	2	NA	NA	NA
Ruminococcaceae_UCG-009	Ruminococcaceae	Clostridiales	Clostridia	Firmicutes	Yes	No	NA	4	NA	4	2	6	5	9	NA
Ruminococcaceae_UCG-010	Ruminococcaceae	Clostridiales	Clostridia	Firmicutes	Yes	Yes	6	16	5	16	10	22	3	2	NA
Ruminococcaceae_UCG-013	Ruminococcaceae	Clostridiales	Clostridia	Firmicutes	No	No	NA	NA	NA	NA	2	NA	2	NA	NA
Ruminococcaceae_UCG-014	Ruminococcaceae	Clostridiales	Clostridia	Firmicutes	No	No	NA	NA	3	NA	3	NA	NA	NA	NA
Ruminococcaceae_Unclassified	Ruminococcaceae	Clostridiales	Clostridia	Firmicutes	Yes	Yes	25	33	22	39	14	28	11	24	NA
Saccharimonadaceae_Unclassified	Saccharimonadaceae	Saccharimonadales	Saccharimonadia	Patescibacteria	No	No	2	NA	NA	NA	2	NA	NA	NA	NA
Saccharimonadales_Unclassified	NA	Saccharimonadales	Saccharimonadia	Patescibacteria	Yes	Yes	9	35	3	25	22	52	6	31	8
Sphaerochaeta	Spirochaetaceae	Spirochaetales	Spirochaetia	Spirochaetes	Yes	No	NA	4	9	11	NA	4	2	5	NA
Sphingomonas	Sphingomonadaceae	Sphingomonadales	Alphaproteobacteria	Proteobacteria	Yes	No	2	11	NA	3	3	6	2	9	NA
Spirochaeta	Spirochaetaceae	Spirochaetales	Spirochaetes	Spirochaetes	Yes	No	NA	2	NA	2	NA	2	NA	2	NA
Subcluster_IVb	Termite_cluster_IV	incertae_sedis	Subphylum_2	Candidate_phylum_TG3	Yes	Yes	3	17	15	27	2	15	17	24	NA
Sulfurospirillum	Campylobacteraceae	Campylobacterales	Epsilonproteobacteria	Proteobacteria	Yes	No	NA	34	NA	26	NA	32	NA	34	11
Tannerella	Porphyromonadaceae_3	Bacteroidales	Bacteroidia	Bacteroidetes	Yes	Yes	6	41	5	41	2	32	3	30	14
Termite_cluster	Lachnospiraceae	Clostridiales	Clostridia_1	Firmicutes	No	No	NA	NA	2	2	NA	NA	NA	NA	NA
Termite_cluster	OPB56	Chlorobiales	Chlorobia	Chlorobi	No	No	NA	NA	NA	NA	NA	NA	2	NA	NA
Termite_cluster	Rhodocyclaceae_3	Rhodocyclales	Betaproteobacteria	Proteobacteria	Yes	Yes	6	20	6	9	5	22	26	49	NA
Termite_cluster	SB_1	Sphingobacteriales_1	Sphingobacteria	Bacteroidetes	Yes	Yes	15	93	19	81	8	50	5	88	15
Termite_cluster_3	Porphyromonadaceae_2	Bacteroidales	Bacteroidia	Bacteroidetes	No	No	11	12	NA	NA	NA	NA	NA	NA	NA
Termite_cluster_II	Porphyromonadaceae_Gut_group	Bacteroidales	Bacteroidia	Bacteroidetes	No	No	2	2	NA	NA	NA	NA	NA	NA	NA
Termite_cluster_III	Desulfovibrionaceae	Desulfovibrionales	Deltaproteobacteria	Proteobacteria	Yes	No	NA	21	NA	22	4	17	7	20	2
Termite_cluster_III	Porphyromonadaceae_Gut_group	Bacteroidales	Bacteroidia	Bacteroidetes	Yes	No	6	15	NA	6	7	16	2	7	NA
Termite_Cockroach_cluster	Porphyromonadaceae_Cluster_V	Bacteroidales	Bacteroidia	Bacteroidetes	Yes	Yes	57	56	8	25	2	17	5	18	NA
Termite_cockroach_cluster	Ruminococcaceae	Clostridiales	Clostridia_1	Firmicutes	Yes	Yes	39	195	19	160	33	176	30	158	28
Termite_cockroach_cluster	Synergistaceae	Synergistales	Synergistia	Synergistetes	Yes	Yes	3	23	4	22	3	20	16	35	3
Termite_cockroach_cluster_1	Family_XIII_Incertae_Sedis	Clostridiales	Clostridia_1	Firmicutes	Yes	Yes	14	45	3	51	7	39	5	34	3
Termite_cockroach_cluster_2	Family_XIII_Incertae_Sedis	Clostridiales	Clostridia_1	Firmicutes	Yes	Yes	11	66	9	72	19	80	12	77	10
Thalassospira	Rhodospirillaceae	Rhodospirillales_1	Alphaproteobacteria	Proteobacteria	No	No	NA	NA	2	NA	NA	2	2	NA	NA
Thermosinus	Veillonellaceae	Clostridiales_1	Clostridia_2	Firmicutes	Yes	No	NA	28	2	27	4	29	2	28	NA
Treponema_Ia	Spirochaetaceae_Treponema_I	Spirochaetales	Spirochaetes	Spirochaetes	No	No	NA	NA	2	2	NA	NA	NA	NA	NA
Treponema_Ie	Spirochaetaceae_Treponema_I	Spirochaetales	Spirochaetes	Spirochaetes	Yes	Yes	9	22	16	53	3	50	85	113	3
Treponema_III	Spirochaetaceae_Treponema	Spirochaetales	Spirochaetes	Spirochaetes	No	No	NA	4	NA	NA	NA	13	3	3	NA
Uncultured_1	Marinilabiaceae	Bacteroidales	Bacteroidia	Bacteroidetes	Yes	No	10	39	20	46	NA	32	2	31
Uncultured_1	Mycoplasmataceae	Mycoplasmatales	Mollicutes	Tenericutes	No	No	NA	NA	NA	NA	2	2	NA	NA	NA
Uncultured_10	Coriobacteriaceae	Coriobacteriales	Actinobacteria	Actinobacteria	Yes	Yes	10	149	4	144	23	160	17	158	58
Uncultured_13	Lachnospiraceae	Clostridiales	Clostridia_1	Firmicutes	No	No	NA	NA	NA	2	8	7	2	3	NA
Uncultured_2	Peptococcaceae_1	Clostridiales_1	Clostridia_2	Firmicutes	Yes	Yes	13	17	18	25	15	24	5	13	NA
Uncultured_24	Ruminococcaceae	Clostridiales	Clostridia_1	Firmicutes	Yes	Yes	7	75	25	142	32	141	26	132	13
Uncultured_3	Erysipelotrichaceae	Erysipelotrichales	Erysipelotrichi	Firmicutes	No	No	7	5	NA	NA	NA	NA	NA	NA	NA
Uncultured_5	Peptococcaceae_1	Clostridiales_1	Clostridia_2	Firmicutes	Yes	No	NA	16	NA	16	NA	15	NA	16	6
Uncultured_54	Lachnospiraceae	Clostridiales	Clostridia_1	Firmicutes	No	No	NA	NA	NA	2	NA	2	NA	2	NA
Uncultured_62	Lachnospiraceae	Clostridiales	Clostridia_1	Firmicutes	Yes	No	NA	2	NA	2	NA	2	NA	2	NA
Uncultured_7	Veillonellaceae	Clostridiales_1	Clostridia_2	Firmicutes	No	No	NA	NA	12	25	3	19	20	36	NA
vadinBA26_Unclassified	NA	vadinBA26	Dehalococcoidia	Chloroflexi	No	No	2	2	NA	NA	NA	NA	NA	NA	NA
vadinHA49_Unclassified	NA	NA	vadinHA49	Planctomycetes	Yes	No	NA	90	53	252	31	226	48	232	28
Victivallaceae_Unclassified	Victivallaceae	Victivallales	Lentisphaeria	Lentisphaerae	No	No	NA	2	2	3	NA	NA	NA	NA	NA
Victivallales_Unclassified	NA	Victivallales	Lentisphaeria	Lentisphaerae	No	No	NA	NA	NA	2	NA	NA	NA	2	NA
WCHB1-41_Unclassified	NA	WCHB1-41	Kiritimatiellae	Kiritimatiellaeota	Yes	Yes	8	9	3	9	3	7	4	10	NA

## Sheet: Supp. Table 10
Supplemental Table 10. Random Forest model SHAP values plotted in Figure 5. This includes the values for the normalized observed transmission model, the null model, and the normalized observed transmission minus the null. The variables representing the predictive power of genera are listed as ‘Family. Genus’ corresponding to Fig. 5e. Mean 1 and Mean 2 refer to the mean of ‘True’ and ‘False’ predi…
Variable	Observed Transmission SHAP score	Mean_1	Mean_2	Model	Observed transmission SHAP minus Null model SHAP	Null model SHAP score
Abundance_in_origin	0.111728	0.212491	0.100763	Complete vertical transmission	0.00501414	0.106714
Abundance_in_origin	0.0418292	0.194512	0.152683	Transmission to founding reproductives	-0.247986	0.289816
Abundance_in_origin	0.25783	0.228468	-0.0293624	Transmission to daughter colonies	0.193806	0.0640244
Actinobacteria	0.0149333	0.0130304	-0.00190293	Complete vertical transmission	0.00624529	0.00868802
Actinobacteria	0.0102492	0.0087565	-0.00149274	Transmission to founding reproductives	0.00206666	0.00818257
Actinobacteria	0.00757196	0.00655718	-0.00101479	Transmission to daughter colonies	0.00528084	0.00229113
Termite_cluster_1._Candidatus_Ancillula_trichonymphae	-0.0667777	-0.0638826	0.00289514	Complete vertical transmission	-0.0587759	-0.00800184
Termite_cluster_1._Candidatus_Ancillula_trichonymphae	-0.05829	-0.055978	0.00231199	Transmission to founding reproductives	-0.0648219	0.0065319
Termite_cluster_1._Candidatus_Ancillula_trichonymphae	-0.0284397	-0.0270561	0.00138366	Transmission to daughter colonies	-0.0177857	-0.0106541
Coriobacteriaceae._Uncultured_10	0.0458637	0.0419162	-0.00394744	Complete vertical transmission	0.0334457	0.0124179
Coriobacteriaceae._Uncultured_10	0.0458172	0.0415287	-0.0042885	Transmission to founding reproductives	0.0355831	0.0102341
Coriobacteriaceae._Uncultured_10	0.0303923	0.0276834	-0.00270898	Transmission to daughter colonies	0.016272	0.0141203
Actinobacteria.1	0.0144335	0.0129731	-0.00146041	Complete vertical transmission	0.00738683	0.00704671
Actinobacteria.1	0.010645	0.009168	-0.00147702	Transmission to founding reproductives	0.00403905	0.00660597
Actinobacteria.1	0.00818994	0.00720193	-0.000988011	Transmission to daughter colonies	0.00638879	0.00180115
Actinomycetales	-0.0567012	-0.0544177	0.0022835	Complete vertical transmission	-0.0473266	-0.0093746
Actinomycetales	-0.0565046	-0.0541452	0.00235942	Transmission to founding reproductives	-0.0592405	0.00273582
Actinomycetales	-0.0313987	-0.0296891	0.0017097	Transmission to daughter colonies	-0.0165825	-0.0148162
Alphaproteobacteria	-0.000482754	-0.000482153	6.00773e-07	Complete vertical transmission	0.00317034	-0.0036531
Alphaproteobacteria	0.00157952	0.00154183	-3.76867e-05	Transmission to founding reproductives	0.00365429	-0.00207477
Alphaproteobacteria	-0.00421507	-0.00414641	6.86558e-05	Transmission to daughter colonies	0.00160185	-0.00581692
Bacillaceae	-0.0132519	-0.0130412	0.000210713	Complete vertical transmission	-0.00924268	-0.00400925
Bacillaceae	-0.0204991	-0.0200732	0.000425938	Transmission to founding reproductives	-0.0171764	-0.00332271
Bacillaceae	-0.00593682	-0.00578959	0.000147229	Transmission to daughter colonies	-0.0024785	-0.00345832
Bacillales	-0.0159715	-0.015725	0.000246529	Complete vertical transmission	-0.0139909	-0.00198063
Bacillales	-0.0194097	-0.0190051	0.000404606	Transmission to founding reproductives	-0.0151874	-0.00422228
Bacillales	-0.00946843	-0.00927693	0.000191506	Transmission to daughter colonies	-0.00707931	-0.00238913
Bacilli	-0.0619836	-0.0598287	0.00215486	Complete vertical transmission	-0.0403481	-0.0216355
Bacilli	-0.0793431	-0.0763902	0.0029529	Transmission to founding reproductives	-0.0569322	-0.022411
Bacilli	-0.0389213	-0.037479	0.0014423	Transmission to daughter colonies	-0.0228472	-0.0160741
Bacteroidaceae	-0.0418604	-0.0399001	0.00196036	Complete vertical transmission	-0.0441446	0.00228419
Bacteroidaceae	-0.0725622	-0.0687609	0.00380124	Transmission to founding reproductives	-0.0694534	-0.00310877
Bacteroidaceae	-0.0208735	-0.0198966	0.000976959	Transmission to daughter colonies	-0.0208909	1.73606e-05
Bacteroidales	-0.00270236	-0.000514644	0.00218771	Complete vertical transmission	-0.000997473	-0.00170488
Bacteroidales	0.0101428	0.00688821	-0.00325462	Transmission to founding reproductives	0.00600231	0.00414052
Bacteroidales	-0.00634723	-0.00315878	0.00318845	Transmission to daughter colonies	0.00252828	-0.00887551
Bacteroidetes	0.0158088	0.0103776	-0.00543117	Complete vertical transmission	0.0156437	0.00016508
Bacteroidetes	0.019251	0.0123547	-0.0068963	Transmission to founding reproductives	0.0143922	0.00485884
Bacteroidetes	0.00754125	0.00566411	-0.00187714	Transmission to daughter colonies	0.0117514	-0.00421018
Bacteroidaceae._Bacteroides	-0.0450881	-0.0430502	0.0020379	Complete vertical transmission	-0.0494532	0.00436514
Bacteroidaceae._Bacteroides	-0.0752484	-0.0712234	0.00402503	Transmission to founding reproductives	-0.0718109	-0.00343751
Bacteroidaceae._Bacteroides	-0.0201194	-0.0190157	0.00110361	Transmission to daughter colonies	-0.0196075	-0.000511828
Marinilabiaceae._Uncultured_1	0.00737352	0.00700299	-0.000370522	Complete vertical transmission	0.0125784	-0.00520486
Marinilabiaceae._Uncultured_1	-0.019252	-0.0191739	7.81032e-05	Transmission to founding reproductives	-0.000453112	-0.0187989
Marinilabiaceae._Uncultured_1	0.0349057	0.0341789	-0.00072677	Transmission to daughter colonies	0.0226236	0.0122821
Porphyromonadaceae_1._Dysgonomonas	0.0287756	0.0260204	-0.00275518	Complete vertical transmission	0.0193509	0.0094247
Porphyromonadaceae_1._Dysgonomonas	0.0294721	0.026945	-0.00252706	Transmission to founding reproductives	0.0188972	0.0105748
Porphyromonadaceae_1._Dysgonomonas	0.0128104	0.0123342	-0.000476185	Transmission to daughter colonies	0.00245418	0.0103562
Porphyromonadaceae_3._Cluster_IV	-0.045155	-0.0449381	0.000216905	Complete vertical transmission	-0.0280981	-0.0170569
Porphyromonadaceae_3._Cluster_IV	-0.0242793	-0.0241836	9.5697e-05	Transmission to founding reproductives	-0.0136379	-0.0106413
Porphyromonadaceae_3._Cluster_IV	-0.0189784	-0.0189198	5.86364e-05	Transmission to daughter colonies	-0.0104611	-0.00851732
Porphyromonadaceae_3._Tannerella	0.178685	0.17315	-0.00553466	Complete vertical transmission	0.0327686	0.145916
Porphyromonadaceae_3._Tannerella	0.15884	0.153839	-0.00500146	Transmission to founding reproductives	0.0572756	0.101565
Porphyromonadaceae_3._Tannerella	0.126737	0.122712	-0.0040252	Transmission to daughter colonies	0.000363908	0.126373
Porphyromonadaceae_Cluster_V._Termite_Cockroach_cluster	-0.00509204	-0.00505611	3.59338e-05	Complete vertical transmission	5.52149e-05	-0.00514726
Porphyromonadaceae_Cluster_V._Termite_Cockroach_cluster	-0.00125731	-0.0012438	1.35052e-05	Transmission to founding reproductives	0.00768786	-0.00894517
Porphyromonadaceae_Cluster_V._Termite_Cockroach_cluster	0.00154934	0.00159565	4.63175e-05	Transmission to daughter colonies	0.00561954	-0.00407021
Porphyromonadaceae_Gut_group._Termite_cluster_III	-0.0375704	-0.0371162	0.00045425	Complete vertical transmission	-0.0597623	0.0221918
Porphyromonadaceae_Gut_group._Termite_cluster_III	-0.0205015	-0.0201826	0.000318837	Transmission to founding reproductives	-0.114175	0.093674
Porphyromonadaceae_Gut_group._Termite_cluster_III	-0.0123754	-0.0121595	0.000215846	Transmission to daughter colonies	-0.00175532	-0.01062
Rikenellaceae._Alisitpes_IV	-0.133909	-0.11759	0.0163188	Complete vertical transmission	-0.126594	-0.00731489
Rikenellaceae._Alisitpes_IV	-0.188469	-0.169117	0.0193526	Transmission to founding reproductives	-0.197642	0.00917246
Rikenellaceae._Alisitpes_IV	-0.0771863	-0.0659188	0.0112675	Transmission to daughter colonies	-0.0663036	-0.0108827
Rikenellaceae._Alistipes_II	0.0948969	0.0810181	-0.0138788	Complete vertical transmission	0.10699	-0.012093
Rikenellaceae._Alistipes_II	0.135909	0.116012	-0.0198962	Transmission to founding reproductives	0.14754	-0.0116313
Rikenellaceae._Alistipes_II	0.0565539	0.0505544	-0.00599945	Transmission to daughter colonies	0.0686607	-0.0121068
SB_1._Termite_cluster	0.0314562	0.0306448	-0.000811398	Complete vertical transmission	0.009066	0.0223902
SB_1._Termite_cluster	0.0320406	0.0310633	-0.000977288	Transmission to founding reproductives	0.021126	0.0109145
SB_1._Termite_cluster	0.0285717	0.0278276	-0.00074406	Transmission to daughter colonies	0.0195376	0.00903405
Bacteroidia	-0.00083831	-7.99915e-06	0.000830311	Complete vertical transmission	-0.00175945	0.000921137
Bacteroidia	0.00678402	0.00477269	-0.00201133	Transmission to founding reproductives	0.00553729	0.00124673
Bacteroidia	-0.00788882	-0.00377055	0.00411827	Transmission to daughter colonies	0.000442021	-0.00833084
Betaproteobacteria	-0.0016076	-0.00147509	0.00013251	Complete vertical transmission	0.00107314	-0.00268074
Betaproteobacteria	-0.00536778	-0.00486004	0.000507742	Transmission to founding reproductives	0.000880232	-0.00624802
Betaproteobacteria	0.00350634	0.00324682	-0.000259522	Transmission to daughter colonies	-0.00413433	0.00764068
Blue	0.00659381	0.00525559	-0.00133822	Complete vertical transmission	-0.00144952	0.00804332
Blue	0.0161546	0.0124325	-0.00372208	Transmission to founding reproductives	-7.37643e-05	0.0162284
Blue	-0.010765	-0.00765986	0.00310516	Transmission to daughter colonies	0.00313311	-0.0138981
Campylobacteraceae	0.0115023	0.0100878	-0.0014145	Complete vertical transmission	0.00596165	0.00554068
Campylobacteraceae	0.00932945	0.007969	-0.00136045	Transmission to founding reproductives	0.00485374	0.00447571
Campylobacteraceae	0.00904835	0.00781398	-0.00123436	Transmission to daughter colonies	0.00690775	0.0021406
Campylobacterales	0.0128086	0.0110398	-0.0017688	Complete vertical transmission	0.00550967	0.00729889
Campylobacterales	0.0104488	0.0089263	-0.00152249	Transmission to founding reproductives	0.00532358	0.00512521
Campylobacterales	0.00702915	0.00620544	-0.000823711	Transmission to daughter colonies	0.00268152	0.00434763
Candidate_phylum_TG3	-0.024012	-0.0232956	0.00071642	Complete vertical transmission	-0.0266213	0.00260922
Candidate_phylum_TG3	-0.0430044	-0.041302	0.0017024	Transmission to founding reproductives	-0.0456572	0.00265278
Candidate_phylum_TG3	-0.0304843	-0.0298523	0.00063204	Transmission to daughter colonies	-0.0334201	0.00293573
Termite_cluster_IV._Subcluster_IVb	-0.0244627	-0.023623	0.000839747	Complete vertical transmission	-0.0288314	0.00436868
Termite_cluster_IV._Subcluster_IVb	-0.0367141	-0.0352848	0.00142927	Transmission to founding reproductives	-0.0386925	0.00197844
Termite_cluster_IV._Subcluster_IVb	-0.0321619	-0.031558	0.000603905	Transmission to daughter colonies	-0.0364691	0.0043072
Clostridia	-0.0165748	-0.0163672	0.000207584	Complete vertical transmission	0.0179832	-0.034558
Clostridia	-0.0222455	-0.0220058	0.000239694	Transmission to founding reproductives	0.000100276	-0.0223458
Clostridia	-0.0067966	-0.00667991	0.000116696	Transmission to daughter colonies	0.0232159	-0.0300125
Clostridia_1	0.00362157	0.00275626	-0.000865306	Complete vertical transmission	-0.0576955	0.0613171
Clostridia_1	-0.00198736	-0.000945823	0.00104153	Transmission to founding reproductives	-0.0481054	0.0461181
Clostridia_1	0.0110185	0.00912237	-0.00189616	Transmission to daughter colonies	-0.0571333	0.0681518
Clostridia_2	-0.0319596	-0.0311897	0.000769844	Complete vertical transmission	-0.0267928	-0.00516681
Clostridia_2	-0.0194316	-0.0190472	0.000384486	Transmission to founding reproductives	-0.0243043	0.00487267
Clostridia_2	-0.0159497	-0.0155944	0.000355305	Transmission to daughter colonies	-0.00863066	-0.00731909
Clostridiaceae_1	-0.0307983	-0.029223	0.00157535	Complete vertical transmission	-0.0329941	0.00219578
Clostridiaceae_1	-0.0309189	-0.0289355	0.00198339	Transmission to founding reproductives	-0.0415182	0.0105993
Clostridiaceae_1	-0.0305205	-0.0290672	0.00145327	Transmission to daughter colonies	-0.0417908	0.0112703
Clostridiales	-0.000865535	-0.000262765	0.000602769	Complete vertical transmission	-0.0577303	0.0568648
Clostridiales	-0.0165329	-0.0106583	0.00587468	Transmission to founding reproductives	-0.0527916	0.0362586
Clostridiales	-0.000262973	0.000267375	0.000530348	Transmission to daughter colonies	-0.0553148	0.0550519
Clostridiales_1	-0.0277976	-0.0271521	0.000645501	Complete vertical transmission	-0.024103	-0.00369456
Clostridiales_1	-0.0119291	-0.0116282	0.000300872	Transmission to founding reproductives	-0.0157429	0.0038138
Clostridiales_1	-0.0113729	-0.0110745	0.000298362	Transmission to daughter colonies	-0.00389007	-0.00748281
Coriobacteriaceae	0.0477946	0.0439508	-0.00384379	Complete vertical transmission	0.0342254	0.0135692
Coriobacteriaceae	0.0460194	0.0419635	-0.00405587	Transmission to founding reproductives	0.0338477	0.0121717
Coriobacteriaceae	0.0279655	0.0253909	-0.00257455	Transmission to daughter colonies	0.01491	0.0130555
Coriobacteriales	0.0414672	0.0379179	-0.00354925	Complete vertical transmission	0.028808	0.0126592
Coriobacteriales	0.0454453	0.0410633	-0.00438204	Transmission to founding reproductives	0.0342845	0.0111608
Coriobacteriales	0.0225768	0.0203259	-0.00225091	Transmission to daughter colonies	0.00795741	0.0146194
Deltaproteobacteria	0.0769443	0.0708577	-0.00608658	Complete vertical transmission	0.0597153	0.017229
Deltaproteobacteria	0.0631439	0.0584171	-0.00472677	Transmission to founding reproductives	0.0405662	0.0225777
Deltaproteobacteria	0.0637683	0.0577676	-0.00600072	Transmission to daughter colonies	0.0496715	0.0140968
Desulfobacteraceae	-0.0114007	-0.0111521	0.000248572	Complete vertical transmission	-0.0185981	0.00719737
Desulfobacteraceae	-0.0245925	-0.0240255	0.000566914	Transmission to founding reproductives	-0.0260503	0.00145788
Desulfobacteraceae	-0.0473431	-0.0470635	0.000279577	Transmission to daughter colonies	-0.0643509	0.0170078
Desulfobacterales	-0.00469511	-0.00454747	0.000147633	Complete vertical transmission	0.00129999	-0.0059951
Desulfobacterales	-0.0216515	-0.0211641	0.000487391	Transmission to founding reproductives	-0.0155558	-0.00609572
Desulfobacterales	-0.0125816	-0.0124183	0.000163308	Transmission to daughter colonies	-0.0102314	-0.00235019
Desulfobulbaceae	0.00859655	0.00848321	-0.000113337	Complete vertical transmission	0.0151128	-0.00651623
Desulfobulbaceae	-0.00134008	-0.00145812	-0.000118046	Transmission to founding reproductives	-0.00234964	0.00100956
Desulfobulbaceae	0.00662477	0.00653477	-8.99916e-05	Transmission to daughter colonies	0.0134978	-0.00687299
Desulfovibrionaceae	0.0866988	0.0776625	-0.00903634	Complete vertical transmission	0.0507566	0.0359422
Desulfovibrionaceae	0.0917676	0.0823772	-0.00939034	Transmission to founding reproductives	0.047919	0.0438486
Desulfovibrionaceae	0.080677	0.0716805	-0.00899652	Transmission to daughter colonies	0.0533861	0.0272909
Desulfovibrionales	0.0924533	0.0834966	-0.00895677	Complete vertical transmission	0.0571718	0.0352815
Desulfovibrionales	0.0939324	0.0843057	-0.00962664	Transmission to founding reproductives	0.057578	0.0363544
Desulfovibrionales	0.0888687	0.0790035	-0.00986524	Transmission to daughter colonies	0.061025	0.0278437
Epsilonproteobacteria	0.0129087	0.0115139	-0.00139473	Complete vertical transmission	0.00769812	0.00521054
Epsilonproteobacteria	0.0120283	0.0106096	-0.00141871	Transmission to founding reproductives	0.00690996	0.00511831
Epsilonproteobacteria	0.00885289	0.0076741	-0.00117879	Transmission to daughter colonies	0.0052874	0.00356549
Erysipelotrichaceae	-0.0093108	-0.00922999	8.08077e-05	Complete vertical transmission	-0.00856451	-0.000746285
Erysipelotrichaceae	-0.00943921	-0.00936401	7.51998e-05	Transmission to founding reproductives	-0.0092173	-0.000221913
Erysipelotrichaceae	-0.00766111	-0.00760288	5.82333e-05	Transmission to daughter colonies	-0.0048263	-0.00283481
Erysipelotrichales	-0.00585517	-0.0057762	7.89723e-05	Complete vertical transmission	-0.00464239	-0.00121278
Erysipelotrichales	-0.00618484	-0.00611845	6.63922e-05	Transmission to founding reproductives	-0.00530365	-0.000881189
Erysipelotrichales	-0.0101864	-0.0101253	6.11753e-05	Transmission to daughter colonies	-0.00963961	-0.000546839
Erysipelotrichi	-0.00629623	-0.00622618	7.00448e-05	Complete vertical transmission	-0.00535903	-0.000937199
Erysipelotrichi	-0.00880062	-0.00873159	6.90358e-05	Transmission to founding reproductives	-0.00799691	-0.000803711
Erysipelotrichi	-0.00715561	-0.00707318	8.24365e-05	Transmission to daughter colonies	-0.00520243	-0.00195319
Firmicutes	-0.0502567	-0.0350942	0.0151625	Complete vertical transmission	-0.0640935	0.0138368
Firmicutes	-0.0669282	-0.0463445	0.0205838	Transmission to founding reproductives	-0.0702377	0.00330946
Firmicutes	-0.0350288	-0.0239245	0.0111043	Transmission to daughter colonies	-0.0510348	0.016006
Bacillaceae._Bacillus	-0.0130079	-0.0127624	0.000245477	Complete vertical transmission	-0.0103627	-0.00264524
Bacillaceae._Bacillus	-0.0174155	-0.0170436	0.00037194	Transmission to founding reproductives	-0.0137054	-0.00371014
Bacillaceae._Bacillus	-0.0084003	-0.00819196	0.000208341	Transmission to daughter colonies	-0.00444147	-0.00395882
Streptococcaceae._Lactovum	-0.0143128	-0.0138941	0.000418683	Complete vertical transmission	-0.0092499	-0.00506293
Streptococcaceae._Lactovum	-0.0271032	-0.0260448	0.00105838	Transmission to founding reproductives	-0.0182965	-0.00880671
Streptococcaceae._Lactovum	-0.00818652	-0.0078638	0.000322719	Transmission to daughter colonies	-0.0028056	-0.00538093
Clostridiaceae_1._Arthropod_cluster	-0.0253761	-0.0241417	0.00123442	Complete vertical transmission	-0.0256667	0.0002906
Clostridiaceae_1._Arthropod_cluster	-0.0274377	-0.0255911	0.00184657	Transmission to founding reproductives	-0.0354778	0.00804012
Clostridiaceae_1._Arthropod_cluster	-0.0286967	-0.0271176	0.00157909	Transmission to daughter colonies	-0.0387216	0.0100249
Lachnospiraceae._Gut_cluster_13	0.0769104	0.0705629	-0.00634747	Complete vertical transmission	0.0593694	0.017541
Lachnospiraceae._Gut_cluster_13	0.0677022	0.0616331	-0.00606908	Transmission to founding reproductives	0.06444	0.00326219
Lachnospiraceae._Gut_cluster_13	0.0537234	0.048664	-0.00505939	Transmission to daughter colonies	0.0413107	0.0124126
Lachnospiraceae._Uncultured_13	-0.0381622	-0.0370996	0.00106258	Complete vertical transmission	0.00227439	-0.0404366
Lachnospiraceae._Uncultured_13	-0.0318538	-0.0307753	0.0010785	Transmission to founding reproductives	0.00648521	-0.038339
Lachnospiraceae._Uncultured_13	-0.0443012	-0.0429464	0.00135484	Transmission to daughter colonies	-0.00855745	-0.0357437
Ruminococcaceae._Gut_cluster_1	-0.127017	-0.122389	0.00462837	Complete vertical transmission	-0.234859	0.107842
Ruminococcaceae._Gut_cluster_1	-0.103195	-0.0975609	0.00563371	Transmission to founding reproductives	-0.223095	0.1199
Ruminococcaceae._Gut_cluster_1	-0.0863739	-0.0841597	0.00221414	Transmission to daughter colonies	-0.189682	0.103308
Ruminococcaceae._Insect_cluster	-0.171019	-0.158895	0.012124	Complete vertical transmission	-0.163191	-0.00782854
Ruminococcaceae._Insect_cluster	-0.158473	-0.144777	0.0136957	Transmission to founding reproductives	-0.137799	-0.0206736
Ruminococcaceae._Insect_cluster	-0.100239	-0.0918066	0.00843283	Transmission to daughter colonies	-0.101361	0.00112179
Ruminococcaceae._Termite_cockroach_cluster	0.293463	0.278181	-0.0152815	Complete vertical transmission	0.168403	0.125059
Ruminococcaceae._Termite_cockroach_cluster	0.301698	0.284888	-0.0168103	Transmission to founding reproductives	0.204544	0.0971541
Ruminococcaceae._Termite_cockroach_cluster	0.2736	0.258913	-0.0146866	Transmission to daughter colonies	0.135981	0.137618
Ruminococcaceae._Uncultured_24	0.0159507	0.0158185	-0.000132272	Complete vertical transmission	0.0314331	-0.0154823
Ruminococcaceae._Uncultured_24	-0.00468124	-0.00460761	7.36323e-05	Transmission to founding reproductives	0.00816292	-0.0128442
Ruminococcaceae._Uncultured_24	0.00497652	0.00495598	-2.05388e-05	Transmission to daughter colonies	0.0263542	-0.0213777
Veillonellaceae._Dendrosporobacter	-0.0223535	-0.0218347	0.000518803	Complete vertical transmission	-0.0181756	-0.00417796
Veillonellaceae._Dendrosporobacter	-0.0169826	-0.0165856	0.000396991	Transmission to founding reproductives	-0.0188798	0.00189722
Veillonellaceae._Dendrosporobacter	-0.0119637	-0.0116583	0.000305345	Transmission to daughter colonies	-0.00475675	-0.00720692
Ruminococcaceae._Ruminiclostridium_6	-0.0147433	-0.0145615	0.000181858	Complete vertical transmission	0.0207607	-0.035504
Ruminococcaceae._Ruminiclostridium_7	-0.0129476	-0.0127828	0.000164826	Transmission to founding reproductives	0.00895786	-0.0219055
Ruminococcaceae._Ruminiclostridium_8	-0.00765197	-0.00756333	8.86408e-05	Transmission to daughter colonies	0.0301126	-0.0377646
Erysipelotrichaceae._Erysipelothrix	-0.0070007	-0.00693224	6.84568e-05	Complete vertical transmission	-0.00498229	-0.00201841
Erysipelotrichaceae._Erysipelothrix	-0.00650527	-0.00645641	4.88592e-05	Transmission to founding reproductives	-0.00635398	-0.000151287
Erysipelotrichaceae._Erysipelothrix	-0.00636901	-0.00629187	7.71442e-05	Transmission to daughter colonies	-0.00603129	-0.000337719
Green	0.0146717	0.010482	-0.00418973	Complete vertical transmission	-0.0750497	0.0897214
Green	-0.00955047	-0.00664739	0.00290308	Transmission to founding reproductives	-0.0581238	0.0485733
Green	0.0336451	0.0235501	-0.010095	Transmission to daughter colonies	-0.0681702	0.101815
incertae_sedis	-0.0257672	-0.0249355	0.000831652	Complete vertical transmission	-0.0303869	0.00461974
incertae_sedis	-0.0330367	-0.0315812	0.00145552	Transmission to founding reproductives	-0.0340744	0.0010377
incertae_sedis	-0.0344859	-0.0338143	0.000671607	Transmission to daughter colonies	-0.0380275	0.00354161
Lachnospiraceae	0.0418336	0.0383156	-0.00351802	Complete vertical transmission	0.0467213	-0.00488771
Lachnospiraceae	0.0348876	0.0314767	-0.00341095	Transmission to founding reproductives	0.046703	-0.0118154
Lachnospiraceae	0.0218926	0.0194881	-0.00240453	Transmission to daughter colonies	0.0320232	-0.0101306
Lactobacillales	-0.0178404	-0.0172937	0.000546701	Complete vertical transmission	-0.00960799	-0.00823244
Lactobacillales	-0.0239187	-0.0231028	0.000815871	Transmission to founding reproductives	-0.0154684	-0.00845033
Lactobacillales	-0.00964889	-0.00934034	0.000308557	Transmission to daughter colonies	-0.00362925	-0.00601965
Marinilabiaceae	0.0129007	0.0124486	-0.000452072	Complete vertical transmission	0.0188568	-0.00595611
Marinilabiaceae	-0.00731688	-0.00747424	-0.000157356	Transmission to founding reproductives	0.0116665	-0.0189834
Marinilabiaceae	0.0276778	0.0270524	-0.000625373	Transmission to daughter colonies	0.00848062	0.0191971
Netw_degree	-0.00381885	-0.0022418	0.00157705	Complete vertical transmission	-0.00857907	0.00476022
Netw_degree	0.00190548	0.000288901	-0.00161657	Transmission to founding reproductives	-0.0042128	0.00611828
Netw_degree	-0.00730171	-0.0039425	0.0033592	Transmission to daughter colonies	-0.00256175	-0.00473995
Netw_degree_neg	-0.0061615	-0.00296515	0.00319635	Complete vertical transmission	-0.00856533	0.00240383
Netw_degree_neg	-0.00268196	-0.0026016	8.03624e-05	Transmission to founding reproductives	-0.0149604	0.0122784
Netw_degree_neg	-0.0169758	-0.00866317	0.0083126	Transmission to daughter colonies	-0.010155	-0.00682074
Netw_degree_pos	0.00237627	0.00196639	-0.000409885	Complete vertical transmission	0.00713923	-0.00476296
Netw_degree_pos	0.00731688	0.00283625	-0.00448063	Transmission to founding reproductives	0.014027	-0.00671008
Netw_degree_pos	0.00894478	0.00527127	-0.00367351	Transmission to daughter colonies	0.0144832	-0.00553842
Porphyromonadaceae_1	0.0284975	0.0258953	-0.00260213	Complete vertical transmission	0.0188292	0.00966824
Porphyromonadaceae_1	0.0280247	0.025448	-0.00257677	Transmission to founding reproductives	0.0197271	0.00829763
Porphyromonadaceae_1	0.0142735	0.013669	-0.000604586	Transmission to daughter colonies	0.00264836	0.0116252
Porphyromonadaceae_3	0.124899	0.121537	-0.00336226	Complete vertical transmission	0.0207938	0.104106
Porphyromonadaceae_3	0.13264	0.128392	-0.00424832	Transmission to founding reproductives	0.0551357	0.0775046
Porphyromonadaceae_3	0.112379	0.109249	-0.00312943	Transmission to daughter colonies	0.017313	0.0950658
Porphyromonadaceae_Cluster_V	-0.00114302	-0.00110022	4.27942e-05	Complete vertical transmission	0.0052963	-0.00643932
Porphyromonadaceae_Cluster_V	0.00121847	0.0012643	4.58264e-05	Transmission to founding reproductives	0.00786319	-0.00664472
Porphyromonadaceae_Cluster_V	0.00251602	0.00258051	6.44885e-05	Transmission to daughter colonies	0.00710273	-0.00458671
Porphyromonadaceae_Gut_group	-0.0281636	-0.0277936	0.000369907	Complete vertical transmission	-0.0539047	0.0257411
Porphyromonadaceae_Gut_group	-0.0214642	-0.0211606	0.000303617	Transmission to founding reproductives	-0.106384	0.0849196
Porphyromonadaceae_Gut_group	-0.00132731	-0.00116855	0.000158761	Transmission to daughter colonies	0.00775788	-0.0090852
Proteobacteria	0.044363	0.0347596	-0.0096034	Complete vertical transmission	0.0416151	0.00274795
Proteobacteria	0.0233798	0.0191875	-0.00419235	Transmission to founding reproductives	0.0224339	0.000945944
Proteobacteria	0.0304779	0.024352	-0.00612589	Transmission to daughter colonies	0.0232074	0.00727054
Sphingomonadaceae._Sphingomonas	0.00147139	0.0014234	-4.79852e-05	Complete vertical transmission	0.00620072	-0.00472934
Sphingomonadaceae._Sphingomonas	-0.00250771	-0.00255293	-4.52289e-05	Transmission to founding reproductives	-0.000428055	-0.00207965
Sphingomonadaceae._Sphingomonas	-0.00447319	-0.00440054	7.26519e-05	Transmission to daughter colonies	0.000960107	-0.0054333
Rhodocyclaceae_3._Termite_cluster	0.0011969	0.00111228	-8.46266e-05	Complete vertical transmission	0.0038336	-0.0026367
Rhodocyclaceae_3._Termite_cluster	-0.00827761	-0.00754073	0.000736871	Transmission to founding reproductives	-5.66481e-05	-0.00822096
Rhodocyclaceae_3._Termite_cluster	0.00374573	0.00355874	-0.000186995	Transmission to daughter colonies	-0.00293503	0.00668076
Desulfobacteraceae._Desulfobotulus	-0.0171633	-0.0168716	0.000291719	Complete vertical transmission	-0.0262644	0.00910116
Desulfobacteraceae._Desulfobotulus	-0.0235159	-0.0228896	0.000626297	Transmission to founding reproductives	-0.0253043	0.00178839
Desulfobacteraceae._Desulfobotulus	-0.0404635	-0.0400652	0.000398292	Transmission to daughter colonies	-0.0518734	0.0114098
Desulfobulbaceae._Desulforhopalus	0.00923266	0.00904944	-0.000183217	Complete vertical transmission	0.0150472	-0.00581456
Desulfobulbaceae._Desulforhopalus	-0.00524542	-0.00526138	-1.59652e-05	Transmission to founding reproductives	-0.00443974	-0.000805682
Desulfobulbaceae._Desulforhopalus	0.00491857	0.00486834	-5.02318e-05	Transmission to daughter colonies	0.0110298	-0.00611124
Desulfovibrionaceae._Gut_cluster_3	0.0727346	0.0654098	-0.00732481	Complete vertical transmission	0.036723	0.0360117
Desulfovibrionaceae._Gut_cluster_3	0.0870615	0.0781406	-0.00892088	Transmission to founding reproductives	0.0454406	0.0416209
Desulfovibrionaceae._Gut_cluster_3	0.0999352	0.0889446	-0.0109906	Transmission to daughter colonies	0.0725515	0.0273837
Campylobacteraceae._Arcobacter	-0.0263025	-0.0233247	0.00297776	Complete vertical transmission	-0.0180477	-0.00825476
Campylobacteraceae._Arcobacter	-0.0362855	-0.0330032	0.00328232	Transmission to founding reproductives	-0.0261715	-0.010114
Campylobacteraceae._Arcobacter	-0.0168659	-0.0149732	0.00189264	Transmission to daughter colonies	-0.00585163	-0.0110142
Campylobacteraceae._Sulfurospirillum	0.187265	0.181307	-0.00595704	Complete vertical transmission	0.153441	0.0338231
Campylobacteraceae._Sulfurospirillum	0.20354	0.195996	-0.00754391	Transmission to founding reproductives	0.164253	0.0392868
Campylobacteraceae._Sulfurospirillum	0.184785	0.178502	-0.00628314	Transmission to daughter colonies	0.1557	0.029085
Red	-0.118733	-0.0886415	0.0300917	Complete vertical transmission	-0.0726681	-0.0460651
Red	-0.109155	-0.0807914	0.0283634	Transmission to founding reproductives	-0.0642214	-0.0449335
Red	-0.0949146	-0.0695338	0.0253808	Transmission to daughter colonies	-0.0619526	-0.032962
Rhodocyclaceae_3	-0.000598506	-0.000486815	0.000111692	Complete vertical transmission	0.0018045	-0.00240301
Rhodocyclaceae_3	-0.00790054	-0.00710317	0.000797376	Transmission to founding reproductives	7.46295e-05	-0.00797517
Rhodocyclaceae_3	0.00199974	0.00178756	-0.000212188	Transmission to daughter colonies	-0.0037312	0.00573094
Rhodocyclales	-0.00106513	-0.000767473	0.000297653	Complete vertical transmission	0.00151037	-0.00257549
Rhodocyclales	-0.00633013	-0.00579668	0.000533457	Transmission to founding reproductives	0.00327729	-0.00960742
Rhodocyclales	0.00494754	0.00462661	-0.000320926	Transmission to daughter colonies	-0.00127499	0.00622253
Rikenellaceae	-0.00337697	-0.00287758	0.000499397	Complete vertical transmission	0.0196624	-0.0230394
Rikenellaceae	0.00516366	0.00130425	-0.00385941	Transmission to founding reproductives	0.0031725	0.00199116
Rikenellaceae	-0.0140557	-0.00783717	0.00621855	Transmission to daughter colonies	0.0145813	-0.028637
Ruminococcaceae	-0.0288575	-0.02413	0.00472744	Complete vertical transmission	-0.116552	0.0876949
Ruminococcaceae	-0.0380755	-0.0319199	0.00615559	Transmission to founding reproductives	-0.0997609	0.0616854
Ruminococcaceae	-0.0128244	-0.0114627	0.00136175	Transmission to daughter colonies	-0.121061	0.108237
SB_1	0.0283707	0.0275279	-0.000842751	Complete vertical transmission	0.00620565	0.022165
SB_1	0.029418	0.0285064	-0.000911636	Transmission to founding reproductives	0.018192	0.011226
SB_1	0.0321644	0.0312781	-0.000886333	Transmission to daughter colonies	0.0224622	0.00970224
Sphingobacteria	0.0265176	0.0257203	-0.000797366	Complete vertical transmission	0.00443208	0.0220856
Sphingobacteria	0.0317114	0.0306649	-0.00104648	Transmission to founding reproductives	0.0215857	0.0101257
Sphingobacteria	0.0443705	0.0431494	-0.0012211	Transmission to daughter colonies	0.0355228	0.00884772
Sphingobacteriales_1	0.0260445	0.025274	-0.00077058	Complete vertical transmission	0.00838017	0.0176644
Sphingobacteriales_1	0.025745	0.0248677	-0.000877258	Transmission to founding reproductives	0.0140553	0.0116897
Sphingobacteriales_1	0.0309993	0.0301742	-0.000825099	Transmission to daughter colonies	0.0241904	0.00680887
Sphingomonadaceae	0.0013881	0.00137345	-1.46444e-05	Complete vertical transmission	0.00778096	-0.00639287
Sphingomonadaceae	-0.00806823	-0.00806163	6.5982e-06	Transmission to founding reproductives	-0.00509894	-0.00296929
Sphingomonadaceae	-0.00665295	-0.00656584	8.71063e-05	Transmission to daughter colonies	-0.00292118	-0.00373176
Sphingomonadales	-0.000137211	-0.000163445	-2.62336e-05	Complete vertical transmission	0.00367105	-0.00380826
Sphingomonadales	-0.00787975	-0.00784255	3.72058e-05	Transmission to founding reproductives	-0.0052443	-0.00263545
Sphingomonadales	-0.00467234	-0.0045727	9.96372e-05	Transmission to daughter colonies	-0.000104028	-0.00456831
Spirochaetaceae	0.00373765	0.00377238	3.47251e-05	Complete vertical transmission	0.0102773	-0.00653969
Spirochaetaceae	0.0147196	0.0145297	-0.000189899	Transmission to founding reproductives	0.0213593	-0.00663965
Spirochaetaceae	-0.00608889	-0.00598454	0.000104354	Transmission to daughter colonies	-0.00307801	-0.00301089
Spirochaetaceae_Treponema_I	-0.00691791	-0.00685758	6.03231e-05	Complete vertical transmission	-0.00604239	-0.000875514
Spirochaetaceae_Treponema_I	-0.00290501	-0.00287865	2.63641e-05	Transmission to founding reproductives	-0.0017544	-0.00115061
Spirochaetaceae_Treponema_I	-0.0102323	-0.0101279	0.000104421	Transmission to daughter colonies	-0.00871229	-0.00152005
Spirochaetales	-0.0345537	-0.0340745	0.000479258	Complete vertical transmission	-0.0258689	-0.00868487
Spirochaetales	0.0068683	0.00674538	-0.000122916	Transmission to founding reproductives	0.0158219	-0.00895358
Spirochaetales	-0.0408715	-0.0401756	0.000695886	Transmission to daughter colonies	-0.0336107	-0.00726082
Spirochaetes	-0.00641113	-0.00636303	4.81004e-05	Complete vertical transmission	-0.00540622	-0.00100491
Spirochaetes	-0.00298839	-0.00296522	2.31723e-05	Transmission to founding reproductives	-0.00182004	-0.00116835
Spirochaetes	-0.0096669	-0.00956151	0.000105394	Transmission to daughter colonies	-0.00791044	-0.00175646
Spirochaetaceae_Treponema_I._Treponema_Ie	-0.00839309	-0.00833275	6.03447e-05	Complete vertical transmission	-0.00713219	-0.00126091
Spirochaetaceae_Treponema_I._Treponema_Ie	-0.00156866	-0.00155381	1.48543e-05	Transmission to founding reproductives	-0.000967749	-0.000600916
Spirochaetaceae_Treponema_I._Treponema_Ie	-0.0145437	-0.0144181	0.000125583	Transmission to daughter colonies	-0.011401	-0.00314266
Spirochaetaceae._Sphaerochaeta	-0.00694942	-0.00685425	9.51631e-05	Complete vertical transmission	-0.00238072	-0.00456869
Spirochaetaceae._Sphaerochaeta	0.0137433	0.0134809	-0.000262413	Transmission to founding reproductives	0.022188	-0.00844469
Spirochaetaceae._Sphaerochaeta	-0.00637901	-0.00626211	0.000116898	Transmission to daughter colonies	-0.00153012	-0.00484888
Spirochaetes.1	-0.0323519	-0.0320014	0.00035045	Complete vertical transmission	-0.0240038	-0.00834808
Spirochaetes.1	0.00455944	0.0044897	-6.97443e-05	Transmission to founding reproductives	0.0139247	-0.00936526
Spirochaetes.1	-0.0399287	-0.0392647	0.000663954	Transmission to daughter colonies	-0.0337288	-0.00619988
Spirochaetia	-0.00667158	-0.0065664	0.000105178	Complete vertical transmission	-0.00165133	-0.00502025
Spirochaetia	0.00857272	0.00841227	-0.000160458	Transmission to founding reproductives	0.0140427	-0.00546997
Spirochaetia	-0.00958656	-0.009371	0.000215557	Transmission to daughter colonies	-0.00607059	-0.00351596
Step	-0.0185661	-0.00703419	0.0115319	Complete vertical transmission	0.063917	-0.0824832
Step	0	0	0	Transmission to founding reproductives	0	0
Step	0	0	0	Transmission to daughter colonies	0	0
Streptococcaceae	-0.0133344	-0.012949	0.000385395	Complete vertical transmission	-0.00589701	-0.00743736
Streptococcaceae	-0.0164444	-0.0158771	0.000567328	Transmission to founding reproductives	-0.00898849	-0.00745594
Streptococcaceae	-0.00912199	-0.00875312	0.000368862	Transmission to daughter colonies	-0.00196358	-0.00715841
Subphylum_2	-0.0220983	-0.0215147	0.000583606	Complete vertical transmission	-0.0259479	0.0038496
Subphylum_2	-0.0350419	-0.0337042	0.00133767	Transmission to founding reproductives	-0.0388368	0.00379487
Subphylum_2	-0.0298213	-0.0291442	0.000677104	Transmission to daughter colonies	-0.0339044	0.00408316
Synergistaceae	0.0570276	0.0563734	-0.000654163	Complete vertical transmission	0.0644415	-0.00741395
Synergistaceae	0.0519504	0.0512979	-0.000652514	Transmission to founding reproductives	0.0622001	-0.0102497
Synergistaceae	0.0576864	0.0570375	-0.000648971	Transmission to daughter colonies	0.0544656	0.00322081
Synergistales	0.0638956	0.0632043	-0.000691235	Complete vertical transmission	0.0695674	-0.00567189
Synergistales	0.0511657	0.0504486	-0.000717118	Transmission to founding reproductives	0.0641831	-0.0130174
Synergistales	0.0726644	0.0718269	-0.000837557	Transmission to daughter colonies	0.0709206	0.00174385
Synergistetes	0.065995	0.0652939	-0.000701164	Complete vertical transmission	0.0700725	-0.00407746
Synergistetes	0.0536603	0.0528798	-0.000780548	Transmission to founding reproductives	0.0659092	-0.0122488
Synergistetes	0.0544606	0.0538443	-0.00061631	Transmission to daughter colonies	0.0521085	0.00235216
Synergistaceae._Candidatus_Tammella	0.0568891	0.0562589	-0.000630214	Complete vertical transmission	0.0640184	-0.00712929
Synergistaceae._Candidatus_Tammella	0.0593833	0.0585726	-0.000810712	Transmission to founding reproductives	0.0737111	-0.0143277
Synergistaceae._Candidatus_Tammella	0.0574681	0.0568225	-0.000645589	Transmission to daughter colonies	0.0515038	0.00596432
Synergistia	0.0601347	0.0594335	-0.000701264	Complete vertical transmission	0.0668885	-0.00675376
Synergistia	0.058205	0.0574308	-0.00077422	Transmission to founding reproductives	0.0736595	-0.0154545
Synergistia	0.0555693	0.0549317	-0.000637609	Transmission to daughter colonies	0.0526855	0.0028838
Termite_cluster_1	-0.0784288	-0.0751862	0.0032426	Complete vertical transmission	-0.0683792	-0.0100496
Termite_cluster_1	-0.0568349	-0.054544	0.0022909	Transmission to founding reproductives	-0.0634059	0.00657098
Termite_cluster_1	-0.032189	-0.0305345	0.00165442	Transmission to daughter colonies	-0.0163457	-0.0158433
Termite_cluster_IV	-0.0300178	-0.0290598	0.000957962	Complete vertical transmission	-0.0328469	0.00282915
Termite_cluster_IV	-0.0363382	-0.0349385	0.00139971	Transmission to founding reproductives	-0.0402133	0.0038751
Termite_cluster_IV	-0.0312549	-0.0306206	0.000634309	Transmission to daughter colonies	-0.0373558	0.00610089
Veillonellaceae	-0.0253393	-0.0247383	0.000601066	Complete vertical transmission	-0.0204327	-0.00490659
Veillonellaceae	-0.0167777	-0.0164053	0.000372345	Transmission to founding reproductives	-0.0192466	0.00246894
Veillonellaceae	-0.0121582	-0.0118696	0.000288591	Transmission to daughter colonies	-0.00580406	-0.00635417
Yellow	0.0436749	0.0306954	-0.0129795	Complete vertical transmission	0.0618018	-0.0181269
Yellow	0.0584544	0.0415643	-0.0168901	Transmission to founding reproductives	0.0674573	-0.00900288
Yellow	0.0349278	0.0250764	-0.00985136	Transmission to daughter colonies	0.0488578	-0.01393

## Sheet: Supp. Table 11
Supplemental Table 11. Metadata for all sequenced samples, including pedigree information, caste, collection year, batch, and number of guts pooled. The guts of the parental colony queens was divided in three for extraction and sequencing, and later pooled in silico
SampleID	Caste	Subcaste	Timepoint	Cross	Pedigree	Collection Year	Number of termites	Batch
1	Queen	Section_C	Parental colony	Yellow	Maternal	2016	0.33	1
101	King	Male	Founding reproductive	Father	Paternal	2018	10	2
102	King	Male	Founding reproductive	Father	Paternal	2018	10	2
103	Worker	Minor	Parental colony	Father	Paternal	2018	10	2
104	Worker	Minor	Parental colony	Father	Paternal	2018	10	2
105	Worker	Minor	Parental colony	Father	Paternal	2018	10	2
110	Worker	Minor	Parental colony	Green	Maternal	2016	5	2
111	Worker	Minor	Parental colony	Green	Maternal	2016	5	2
112	Worker	Minor	Parental colony	Blue	Maternal	2016	5	2
113	Worker	Major	Parental colony	Blue	Maternal	2016	5	2
114	Worker	Minor	Parental colony	Yellow	Maternal	2016	8	2
115	Worker	Minor	Parental colony	Yellow	Maternal	2016	8	2
116	Worker	Minor	Parental colony	Red	Maternal	2016	8	2
117	Worker	Minor	Parental colony	Red	Maternal	2016	8	2
11b	Queen	Female	Founding reproductive	Blue	Maternal	2016	6	1
12c	Queen	Female	Founding reproductive	Blue	Maternal	2016	6	1
13	Queen	Section_C	Parental colony	Red	Maternal	2016	0.33	1
14	King	NA	Parental colony	Red	Maternal	2016	1	1
17	Queen	Female	Founding reproductive	Red	Maternal	2016	6	1
18c	Queen	Female	Founding reproductive	Red	Maternal	2016	6	1
19	Queen	Section_C	Parental colony	Green	Maternal	2016	0.33	1
2	King	NA	Parental colony	Green	Maternal	2016	1	1
20c	Queen	NA	Daughter colony	Red	Daughter	2016	2	1
23	Worker	Minor	Daughter colony	Red	Daughter	2016	10	1
24	Worker	Minor	Daughter colony	Red	Daughter	2016	10	1
25	Larva	NA	Daughter colony	Red	Daughter	2016	10	1
26	Worker	Major	Daughter colony	Red	Daughter	2016	10	1
27	Worker	Major	Daughter colony	Red	Daughter	2016	10	1
30b	Queen	NA	Daughter colony	Green	Daughter	2016	1	1
33	Worker	Minor	Daughter colony	Green	Daughter	2016	10	1
34b	Worker	Minor	Daughter colony	Green	Daughter	2016	10	1
35	Larva	NA	Daughter colony	Green	Daughter	2016	10	1
36	Worker	Major	Daughter colony	Green	Daughter	2016	10	1
37b	Worker	Major	Daughter colony	Green	Daughter	2016	10	1
40c	Queen	NA	Daughter colony	Blue	Daughter	2016	2	1
42	Larva	NA	Daughter colony	Blue	Daughter	2016	10	1
43	Worker	Minor	Daughter colony	Blue	Daughter	2016	10	1
44	Worker	Minor	Daughter colony	Blue	Daughter	2016	10	1
46b	Worker	Major	Daughter colony	Blue	Daughter	2016	10	1
47b	Worker	Major	Daughter colony	Blue	Daughter	2016	10	1
5	Queen	Female	Founding reproductive	Yellow	Maternal	2016	5	1
50c	Queen	NA	Daughter colony	Yellow	Daughter	2016	2	1
51	Queen	Female	Founding reproductive	Green	Maternal	2016	6	1
52b	Worker	Minor	Daughter colony	Yellow	Daughter	2016	10	1
53b	Worker	Minor	Daughter colony	Yellow	Daughter	2016	10	1
54	Larva	NA	Daughter colony	Yellow	Daughter	2016	10	1
55	Worker	Major	Daughter colony	Yellow	Daughter	2016	10	1
56b	Worker	Major	Daughter colony	Yellow	Daughter	2016	10	1
57c	Queen	Female	Founding reproductive	Green	Maternal	2016	7	1
6c	Queen	Female	Founding reproductive	Yellow	Maternal	2016	5	1
7	Queen	Section_C	Parental colony	Blue	Maternal	2016	0.33	1
8	King	NA	Parental colony	Blue	Maternal	2016	1	1
Blue-A	Queen	Section_A	Parental colony	Blue	Maternal	2016	0.33	2
Blue-B	Queen	Section_B	Parental colony	Blue	Maternal	2016	0.33	2
Green-A	Queen	Section_A	Parental colony	Green	Maternal	2016	0.33	2
Green-B	Queen	Section_B	Parental colony	Green	Maternal	2016	0.33	2
Red-A	Queen	Section_A	Parental colony	Red	Maternal	2016	0.33	2
Red-B	Queen	Section_B	Parental colony	Red	Maternal	2016	0.33	2
Yellow-A	Queen	Section_A	Parental colony	Yellow	Maternal	2016	0.33	2
Yellow-B	Queen	Section_B	Parental colony	Yellow	Maternal	2016	0.33	2
mock	mock	NA	NA	NA	NA	NA	NA	1
121	mock	NA	NA	NA	NA	NA	NA	2
NTC01	NA	NA	NA	NA	NA	NA	NA	NA
NTC02	NA	NA	NA	NA	NA	NA	NA	NA
NTC03	NA	NA	NA	NA	NA	NA	NA	NA
NTC04	NA	NA	NA	NA	NA	NA	NA	NA
NTC05	NA	NA	NA	NA	NA	NA	NA	NA
NTC06	NA	NA	NA	NA	NA	NA	NA	NA
NTC07	NA	NA	NA	NA	NA	NA	NA	NA

## Sheet: Supp. Table 12
Supplemental Table 12. Concentration of 16S rRNA gene copies found per sample sequenced. The number of termites extracted, elution volume, and dilution factors prior to ddPCR are included, which were used to estimate to the total copies per gut (Extended Data Fig. 2). NTC refers to non-template controls, which were ddH2O.
SampleID	Caste	Cross	Pedigree	Number of termites	Elution volume (uL)	ddPCR 16S concentration	Dilution factor prior to ddPCR	Dilution factor for ddPCR
1	Queen	Yellow	Maternal	0.33	200	1.7	5.5	1
101	King	Father	Paternal	10	200	263	1	100
102	King	Father	Paternal	10	200	544	1	100
103	Worker	Father	Paternal	10	200	1043	1	100
104	Worker	Father	Paternal	10	200	984	1	100
105	Worker	Father	Paternal	10	200	646	1	100
110	Worker	Green	Maternal	5	200	1268	1	100
111	Worker	Green	Maternal	5	200	1307	1	100
112	Worker	Blue	Maternal	5	200	1802	1	100
113	Worker	Blue	Maternal	5	200	1087	1	100
114	Worker	Yellow	Maternal	8	200	3710	1	100
115	Worker	Yellow	Maternal	8	200	5640	1	100
116	Worker	Red	Maternal	8	200	2520	1	100
117	Worker	Red	Maternal	8	200	1810	1	100
11b	Queen	Blue	Maternal	6	200	1058	12.25	10
12c	Queen	Blue	Maternal	6	200	1653	12.25	1
13	Queen	Red	Maternal	0.33	200	14.5	4	1
14	King	Red	Maternal	1	200	2700	4	1
17	Queen	Red	Maternal	6	200	3680	4	1
18c	Queen	Red	Maternal	6	200	2690	12.25	1
19	Queen	Green	Maternal	0.33	200	109	4	1
2	King	Green	Maternal	1	200	2040	10	1
20c	Queen	Red	Daughter	2	200	2640	12.25	1
23	Worker	Red	Daughter	10	200	1320	4	1
24	Worker	Red	Daughter	10	200	2650	4	1
25	Larva	Red	Daughter	10	200	101	4	1
26	Worker	Red	Daughter	10	200	2100	4	1
27	Worker	Red	Daughter	10	200	1852	4	1
30b	Queen	Green	Daughter	1	200	198	12.25	1
33	Worker	Green	Daughter	10	200	1496	5.5	1
34b	Worker	Green	Daughter	10	200	930	12.25	1
35	Larva	Green	Daughter	10	200	150	4	1
36	Worker	Green	Daughter	10	200	4770	4	2
37b	Worker	Green	Daughter	10	200	2550	12.25	1
40c	Queen	Blue	Daughter	2	200	4120	12.25	1
42	Larva	Blue	Daughter	10	200	88	4	1
43	Worker	Blue	Daughter	10	200	3640	4	1
44	Worker	Blue	Daughter	10	200	2810	5.5	1
46b	Worker	Blue	Daughter	10	200	2041	4	1
47b	Worker	Blue	Daughter	10	200	2860	12.25	1
5	Queen	Yellow	Maternal	5	200	3270	4	1
50c	Queen	Yellow	Daughter	2	200	2960	12.25	1
51	Queen	Green	Maternal	6	200	2760	5.5	1
52b	Worker	Yellow	Daughter	10	200	1172	12.25	1
53b	Worker	Yellow	Daughter	10	200	2840	12.25	1
54	Larva	Yellow	Daughter	10	200	124	4	1
55	Worker	Yellow	Daughter	10	200	567	4	1
56b	Worker	Yellow	Daughter	10	200	2500	12.25	1
57c	Queen	Green	Maternal	7	200	3060	12.25	1
6c	Queen	Yellow	Maternal	5	200	2330	12.25	1
7	Queen	Blue	Maternal	0.33	200	11.4	4	1
8	King	Blue	Maternal	1	200	2760	4	1
Blue-A	Queen	Blue	Maternal	0.33	200	6.1	1	10
Blue-B	Queen	Blue	Maternal	0.33	200	22.5	1	10
Green-A	Queen	Green	Maternal	0.33	200	41.1	1	10
Green-B	Queen	Green	Maternal	0.33	200	6110	1	10
Red-A	Queen	Red	Maternal	0.33	200	7.8	1	100
Red-B	Queen	Red	Maternal	0.33	200	1.5	1	100
Yellow-A	Queen	Yellow	Maternal	0.33	200	2.3	1	10
Yellow-B	Queen	Yellow	Maternal	0.33	200	1.5	1	10
NTC01	NA	NA	NA	NA	NA	0.49	NA	1
NTC02	NA	NA	NA	NA	NA	1	NA	1
NTC03	NA	NA	NA	NA	NA	1.4	NA	1
NTC04	NA	NA	NA	NA	NA	1.1	NA	1
NTC05	NA	NA	NA	NA	NA	1.1	NA	1
NTC06	NA	NA	NA	NA	NA	0.8	NA	1
NTC07	NA	NA	NA	NA	NA	1.1	NA	1

## Sheet: Supp. Table 13
Supplementary Table 13: Prokaryote taxonomy of the Macrotermes natalensis gut microbiome.
ASV sequence	Phylum	Class	Order	Family	Genus
ACTCCTACGGGAGGCAGCAGTAGGGAATCTTCGGCAATGGGGGGAACCCTGACCGAGCAACGCCGCGTGAGTGAAGAAGGTTTTCGGATCGTAAAACTCTGTTGTAAGTAAAGAACGGGTGAGAGAGTGGAAAGCTCTCACTATGACGGTAACTTACCAGAAAGGGACGGCTAACTACGTGCCAGCAGCCGCGGTAATACGTAGGTCCCGAGCGTTGTCCGGATTTATTGGGCGTAAAGCGAGCGCAGGTGGTTTTTTAAGTCTGGTGTAAAAGGCTACTGCTTAACAGTAGTATGCATTGGAAACTGGAGAACTTGAGTGCAGGAGAGGAGAGTGGAATTCCATGTGTAGCGGTGAAATGCGTAGATATATGGAGGAACACCGGAGGCGAAAGCGGCT…	Firmicutes	Bacilli	Lactobacillales	Enterococcaceae	Enterococcus_3
ACTCCTACGGGAGGCAGCAGTAGGGAATCTTCGGCAATGGGGGGAACCCTGACCGAGCAACGCCGCGTGAGTGAAGAAGGTTTTCGGATCGTAAAACTCTGTTGTAAGTAAAGAACGGGTGAGAGAGTGGAAAGCTCTCACTATGACGGTAACTTACCAGAAAGGGACGGCTAACTACGTGCCAGCAGCCGCGGTAATACGTAGGTCCCGAGCGTTGTCCGGATTTATTGGGCGTAAAGCGAGCGCAGGTGGTTTTTTAAGTCTGGTGTAAAAGGCTACTGCTTAACAGTAGTATGCATTGGAAACTGGAGAACTTGAGTGCAGGAGAGGAGAGTGGAATTCCATGTGTAGCGGTGAAATGCGTAGATATATGGAGGAACACCGGAGGCGAAAGCGGCT…	Firmicutes	Bacilli	Lactobacillales	Enterococcaceae	Enterococcus_3
ACTCCTACGGGAGGCAGCAGTAGGGAATCTTCGGCAATGGGGGGAACCCTGACCGAGCAACGCCGCGTGAGTGAAGAAGGTTTTCGGATCGTAAAACTCTGTTGTAAGTAAAGAACGGGTGAGAGAGTGGAAAGCTCTCACTATGACGGTAACTTACCAGAAAGGGACGGCTAACTACGTGCCAGCAGCCGCGGTAATACGTAGGTCCCGAGCGTTGTCCGGATTTATTGGGCGTAAAGCGAGCGCAGGTGGTTTTTTAAGTCTGGTGTAAAAGGCTACTGCTTAACAGTAGTATGCATTGGAAACTGGAGAACTTGAGTGCAGGAGAGGAGAGTGGAATTCCATGTGTAGCGGTGAAATGCGTAGATATATGGAGGAACACCGGAGGCGAAAGCGGCT…	Firmicutes	Bacilli	Lactobacillales	Enterococcaceae	Enterococcus_3
ACTCCTACGGGAGGCAGCAGTAGGGAATCTTCGGCAATGGGGGGAACCCTGACCGAGCAACGCCGCGTGAGTGAAGAAGGTTTTCGGATCGTAAAACTCTGTTGTAAGTAAAGAACGGGTGAGAGAGTGGAAAGCTCTCACTATGACGGTAACTTACCAGAAAGGGACGGCTAACTACGTGCCAGCAGCCGCGGTAATACGTAGGTCCCGAGCGTTGTCCGGATTTATTGGGCGTAAAGCGAGCGCAGGTGGTTTTTTAAGTCTGGTGTAAAAGGCTACTGCTTAACAGTAGTATGCATTGGAAACTGGAGAACTTGAGTGCAGGAGAGGAGAGTGGAATTCCATGTGTAGCGGTGAAATGCGTAGATATATGGAGGAACACCGGAGGCGAAAGCGGCT…	Firmicutes	Bacilli	Lactobacillales	Enterococcaceae	Enterococcus_3
ACTCCTACGGGAGGCAGCAGTAGGGAATCTTCGGCAATGGGGGGAACCCTGACCGAGCAACGCCGCGTGAGTGAAGAAGGTTTTCGGATCGTAAAACTCTGTTGTAAGTAAAGAACGGGTGAGAGAGTGGAAAGCTCTCACTATGACGGTAACTTACCAGAAAGGGACGGCTAACTACGTGCCAGCAGCCGCGGTAATACGTAGGTCCCGAGCGTTGTCCGGATTTATTGGGCGTAAAGCGAGCGCAGGTGGTTTTTTAAGTCTGGTGTAAAAGGCTACTGCTTAACAGTAGTATGCATTGGAAACTGGAGAACTTGAGTGCAGGAGAGGAGAGTGGAATTCCATGTGTAGCGGTGAAATGCGTAGATATATGGAGGAACACCGGAGGCGAAAGCGGCT…	Firmicutes	Bacilli	Lactobacillales	Enterococcaceae	Enterococcus_3
ACTCCTACGGGAGGCAGCAGTAGGGAATCTTCGGCAATGGGGGGAACCCTGACCGAGCAACGCCGCGTGAGTGAAGAAGGTTTTCGGATCGTAAAACTCTGTTGTAAGTAAAGAACGGGTGAGAGAGTGGAAAGCTCTCACTATGACGGTAACTTACCAGAAAGGGACGGCTAACTACGTGCCAGCAGCCGCGGTAATACGTAGGTCCCGAGCGTTGTCCGGATTTATTGGGCGTAAAGCGAGCGCAGGTGGTTTTTTAAGTCTGGTGTAAAAGGCTACTGCTTAACAGTAGTATGCATTGGAAACTGGAGAACTTGAGTGCAGGAGAGGAGAGTGGAATTCCATGTGTAGCGGTGAAATGCGTAGATATATGGAGGAACACCGGAGGCGAAAGCGGCT…	Firmicutes	Bacilli	Lactobacillales	Enterococcaceae	Enterococcus_3
ACTCCTACGGGAGGCAGCAGTAGGGAATCTTCGGCAATGGGGGGAACCCTGACCGAGCAACGCCGCGTGAGTGAAGAAGGTTTTCGGATCGTAAAACTCTGTTGTAAGTAAAGAACGGGTGAGAGAGTGGAAAGCTCTCACTATGACGGTAACTTACCAGAAAGGGACGGCTAACTACGTGCCAGCAGCCGCGGTAATACGTAGGTCCCGAGCGTTGTCCGGATTTATTGGGCGTAAAGCGAGCGCAGGTGGTTTTTTAAGTCTGGTGTAAAAGGCTACTGCTTAACAGTAGTATGCATTGGAAACTGGAGAACTTGAGTGCAGGAGAGGAGAGTGGAATTCCATGTGTAGCGGTGAAATGCGTAGATATATGGAGGAACACCGGAGGCGAAAGCGGCT…	Firmicutes	Bacilli	Lactobacillales	Enterococcaceae	Enterococcus_3
ACTCCTACGGGAGGCAGCAGTAGGGAATCTTCGGCAATGGGGGGAACCCTGACCGAGCAACGCCGCGTGAGTGAAGAAGGTTTTCGGATCGTAAAACTCTGTTGTAAGTAAAGAACGGGTGAGAGAGTGGAAAGCTCTCACTATGACGGTAACTTACCAGAAAGGGACGGCTAACTACGTGCCAGCAGCCGCGGTAATACGTAGGTCCCGAGCGTTGTCCGGATTTATTGGGCGTAAAGCGAGCGCAGGTGGTTTTTTAAGTCTGGTGTAAAAGGCTACTGCTTAACAGTAGTATGCATTGGAAACTGGAGAACTTGAGTGCAGGAGAGGAGAGTGGAATTCCATGTGTAGCGGTGAAATGCGTAGATATATGGAGGAACACCGGAGGCGAAAGCGGCT…	Firmicutes	Bacilli	Lactobacillales	Enterococcaceae	Enterococcus_3
ACTCCTACGGGAGGCAGCAGTAGGGAATCTTCGGCAATGGGGGGAACCCTGACCGAGCAACGCCGCGTGAGTGAAGAAGGTTTTCGGATCGTAAAACTCTGTTGTAAGTAAAGAACGGGTGAGAGAGTGGAAAGCTCTCACTATGACGGTAACTTACCAGAAAGGGACGGCTAACTACGTGCCAGCAGCCGCGGTAATACGTAGGTCCCGAGCGTTGTCCGGATTTATTGGGCGTAAAGCGAGCGCAGGTGGTTTTTTAAGTCTGGTGTAAAAGGCTACTGCTTAACAGTAGTATGCATTGGAAACTGGAGAACTTGAGTGCAGGAGAGGAGAGTGGAATTCCATGTGTAGCGGTGAAATGCGTAGATATATGGAGGAACACCGGAGGCGAAAGCGGCT…	Firmicutes	Bacilli	Lactobacillales	Enterococcaceae	Enterococcus_3
ACTCCTACGGGAGGCAGCAGTAGGGAATCTTCGGCAATGGGGGGAACCCTGACCGAGCAACGCCGCGTGAGTGAAGAAGGTTTTCGGATCGTAAAACTCTGTTGTAAGTAAAGAACGGGTGAGAGAGTGGAAAGCTCTCACTATGACGGTAACTTACCAGAAAGGGACGGCTAACTACGTGCCAGCAGCCGCGGTAATACGTAGGTCCCGAGCGTTGTCCGGATTTATTGGGCGTAAAGCGAGCGCAGGTGGTTTTTTAAGTCTGGTGTAAAAGGCTACTGCTTAACAGTAGTATGCATTGGAAACTGGAGAACTTGAGTGCAGGAGAGGAGAGTGGAATTCCATGTGTAGCGGTGAAATGCGTAGATATATGGAGGAACACCGGAGGCGAAAGCGGCT…	Firmicutes	Bacilli	Lactobacillales	Enterococcaceae	Enterococcus_3
ACTCCTACGGGAGGCAGCAGTAGGGAATCTTCGGCAATGGGCGCAAGCCTGACCGAGCAACGCCGCGTGAGTGAAGAAGGTTTTCGGATCGTAAAGCTCTGTTGATAGAGAAGAACAGGTGAGAGAGTGGAAAATTCTTGCTTTGACGGTATCTATCCAGAAAGGGACGGCTAACTACGTGCCAGCAGCCGCGGTAATACGTAGGTCCCGAGCGTTGTCCGGATTTATTGGGCGTAAAGCGAGCGCAGGTGGTTCTTTAAGTCTGATGTAAAAGGCAGTGGCTCAACCATTGTAGGCATTGGAAACTGGGGAACTTGAGTGCAGTAGAGGAGAGTGGAATTCCATGTGTAGCGGTGAAATGCGTAGATATATGGAGGAACACCGGAGGCGAAAGCGGCT…	Firmicutes	Bacilli	Lactobacillales	Streptococcaceae	Lactococcus_3
ACTCCTACGGGAGGCAGCAGTAGGGAATCTTCGGCAATGGGGGGAACCCTGACCGAGCAACGCCGCGTGAGTGAAGAAGGTTTTCGGATCGTAAAACTCTGTTGTAAGTAAAGAACGGGTGAGAGAGTGGAAAGCTCTCACTATGACGGTAACTTACCAGAAAGGGACGGCTAACTACGTGCCAGCAGCCGCGGTAATACGTAGGTCCCGAGCGTTGTCCGGATTTATTGGGCGTAAAGCGAGCGCAGGTGGTTTTTTAAGTCTGGTGTAAAAGGCTACTGCTTAACAGTAGTATGCATTGGAAACTGGAGAACTTGAGTGCAGGAGAGGAGAGTGGAATTCCATGTGTAGCGGTGAAATGCGTAGATATATGGAGGAACACCGGAGGCGAAAGCGGCT…	Firmicutes	Bacilli	Lactobacillales	Enterococcaceae	Enterococcus_3
ACTCCTACGGGAGGCAGCAGTAGGGAATCTTCGGCAATGGGGGGAACCCTGACCGAGCAACGCCGCGTGAGTGAAGAAGGTTTTCGGATCGTAAAACTCTGTTGTAAGTAAAGAACGGGTGAGAGAGTGGAAAGCTCTCACTATGACGGTAACTTACCAGAAAGGGACGGCTAACTACGTGCCAGCAGCCGCGGTAATACGTAGGTCCCGAGCGTTGTCCGGATTTATTGGGCGTAAAGCGAGCGCAGGTGGTTTTTTAAGTCTGGTGTAAAAGGCTACTGCTTAACAGTAGTATGCATTGGAAACTGGAGAACTTGAGTGCAGGAGAGGAGAGTGGAATTCCATGTGTAGCGGTGAAATGCGTAGATATATGGAGGAACACCGGAGGCGAAAGCGGCT…	Firmicutes	Bacilli	Lactobacillales	Enterococcaceae	Enterococcus_3
ACTCCTACGGGAGGCAGCAGTAGGGAATCTTCGGCAATGGGGGGAACCCTGACCGAGCAACGCCGCGTGAGTGAAGAAGGTTTTCGGATCGTAAAACTCTGTTGTAAGTAAAGAACGGGTGAGAGAGTGGAAAGCTCTCACTATGACGGTAACTTACCAGAAAGGGACGGCTAACTACGTGCCAGCAGCCGCGGTAATACGTAGGTCCCGAGCGTTGTCCGGATTTATTGGGCGTAAAGCGAGCGCAGGTGGTTTTTTAAGTCTGGTGTAAAAGGCTACTGCTTAACAGTAGTATGCATTGGAAACTGGAGAACTTGAGTGCAGGAGAGGAGAGTGGAATTCCATGTGTAGCGGTGAAATGCGTAGATATATGGAGGAACACCGGAGGCGAAAGCGGCT…	Firmicutes	Bacilli	Lactobacillales	Enterococcaceae	Enterococcus_3
ACTCCTACGGGAGGCAGCAGTAGGGAATCTTCGGCAATGGGGGGAACCCTGACCGAGCAACGCCGCGTGAGTGAAGAAGGTTTTCGGATCGTAAAACTCTGTTGTAAGTAAAGAACGGGTGAGAGAGTGGAAAGCTCTCACTATGACGGTAACTTACCAGAAAGGGACGGCTAACTACGTGCCAGCAGCCGCGGTAATACGTAGGTCCCGAGCGTTGTCCGGATTTATTGGGCGTAAAGCGAGCGCAGGTGGTTTTTTAAGTCTGGTGTAAAAGGCTACTGCTTAACAGTAGTATGCATTGGAAACTGGAGAACTTGAGTGCAGGAGAGGAGAGTGGAATTCCATGTGTAGCGGTGAAATGCGTAGATATATGGAGGAACACCGGAGGCGAAAGCGGCT…	Firmicutes	Bacilli	Lactobacillales	Enterococcaceae	Enterococcus_3
ACTCCTACGGGAGGCAGCAGTAGGGAATCTTCGGCAATGGGCGCAAGCCTGACCGAGCAACGCCGCGTGAGTGAAGAAGGTTTTCGGATCGTAAAGCTCTGTTGATAGAGAAGAACAGGTGAGAGAGTGGAAAATTCTTGCTTTGACGGTATCTATCCAGAAAGGGACGGCTAACTACGTGCCAGCAGCCGCGGTAATACGTAGGTCCCGAGCGTTGTCCGGATTTATTGGGCGTAAAGCGAGCGCAGGTGGTTCTTTAAGTCTGATGTAAAAGGCAGTGGCTCAACCATTGTAGGCATTGGAAACTGGGGAACTTGAGTGCAGTAGAGGAGAGTGGAATTCCATGTGTAGCGGTGAAATGCGTAGATATATGGAGGAACACCGGAGGCGAAAGCGGCT…	Firmicutes	Bacilli	Lactobacillales	Streptococcaceae	Lactococcus_3
ACTCCTACGGGAGGCAGCAGTAGGGAATCTTCGGCAATGGGCGCAAGCCTGACCGAGCAACGCCGCGTGAGTGAAGAAGGTTTTCGGATCGTAAAGCTCTGTTGATAGAGAAGAACAGGTGAGAGAGTGGAAAATTCTTGCTTTGACGGTATCTATCCAGAAAGGGACGGCTAACTACGTGCCAGCAGCCGCGGTAATACGTAGGTCCCGAGCGTTGTCCGGATTTATTGGGCGTAAAGCGAGCGCAGGTGGTTCTTTAAGTCTGATGTAAAAGGCAGTGGCTCAACCATTGTAGGCATTGGAAACTGGGGAACTTGAGTGCAGTAGAGGAGAGTGGAATTCCATGTGTAGCGGTGAAATGCGTAGATATATGGAGGAACACCGGAGGCGAAAGCGGCT…	Firmicutes	Bacilli	Lactobacillales	Streptococcaceae	Lactococcus_3
ACTCCTACGGGAGGCAGCAGTAGGGAATCTTCGGCAATGGGCGCAAGCCTGACCGAGCAACGCCGCGTGAGTGAAGAAGGTTTTCGGATCGTAAAGCTCTGTTGATAGAGAAGAACAGGTGAGAGAGTGGAAAATTCTTGCTTTGACGGTATCTATCCAGAAAGGGACGGCTAACTACGTGCCAGCAGCCGCGGTAATACGTAGGTCCCGAGCGTTGTCCGGATTTATTGGGCGTAAAGCGAGCGCAGGTGGTTCTTTAAGTCTGATGTAAAAGGCAGTGGCTCAACCATTGTAGGCATTGGAAACTGGGGAACTTGAGTGCAGTAGAGGAGAGTGGAATTCCATGTGTAGCGGTGAAATGCGTAGATATATGGAGGAACACCGGAGGCGAAAGCGGCT…	Firmicutes	Bacilli	Lactobacillales	Streptococcaceae	Lactococcus_3
ACTCCTACGGGAGGCAGCAGTAGGGAATCTTCGGCAATGGGGGGAACCCTGACCGAGCAACGCCGCGTGAGTGAAGAAGGTTTTCGGATCGTAAAACTCTGTTGTAAGTAAAGAACGGGTGAGAGAGTGGAAAGCTCTCACTATGACGGTAACTTACCAGAAAGGGACGGCTAACTACGTGCCAGCAGCCGCGGTAATACGTAGGTCCCGAGCGTTGTCCGGATTTATTGGGCGTAAAGCGAGCGCAGGTGGTTTTTTAAGTCTGGTGTAAAAGGCTACTGCTTAACAGTAGTATGCATTGGAAACTGGAGAACTTGAGTGCAGGAGAGGAGAGTGGAATTCCATGTGTAGCGGTGAAATGCGTAGATATATGGAGGAACACCGGAGGCGAAAGCGGCT…	Firmicutes	Bacilli	Lactobacillales	Enterococcaceae	Enterococcus_3
ACTCCTACGGGAGGCAGCAGTAGGGAATCTTCGGCAATGGGGGGAACCCTGACCGAGCAACGCCGCGTGAGTGAAGAAGGTTTTCGGATCGTAAAACTCTGTTGTAAGTAAAGAACGGGTGAGAGAGTGGAAAGCTCTCACTATGACGGTAACTTACCAGAAAGGGACGGCTAACTACGTGCCAGCAGCCGCGGTAATACGTAGGTCCCGAGCGTTGTCCGGATTTATTGGGCGTAAAGCGAGCGCAGGTGGTTTTTTAAGTCTGGTGTAAAAGGCTACTGCTTAACAGTAGTATGCATTGGAAACTGGAGAACTTGAGTGCAGGAGAGGAGAGTGGAATTCCATGTGTAGCGGTGAAATGCGTAGATATATGGAGGAACACCGGAGGCGAAAGCGGCT…	Firmicutes	Bacilli	Lactobacillales	Enterococcaceae	Enterococcus_3
ACTCCTACGGGAGGCAGCAGTAGGGAATCTTCGGCAATGGGGGGAACCCTGACCGAGCAACGCCGCGTGAGTGAAGAAGGTTTTCGGATCGTAAAACTCTGTTGTAAGTAAAGAACGGGTGAGAGAGTGGAAAGCTCTCACTATGACGGTAACTTACCAGAAAGGGACGGCTAACTACGTGCCAGCAGCCGCGGTAATACGTAGGTCCCGAGCGTTGTCCGGATTTATTGGGCGTAAAGCGAGCGCAGGTGGTTTTTTAAGTCTGGTGTAAAAGGCTACTGCTTAACAGTAGTATGCATTGGAAACTGGAGAACTTGAGTGCAGGAGAGGAGAGTGGAATTCCATGTGTAGCGGTGAAATGCGTAGATATATGGAGGAACACCGGAGGCGAAAGCGGCT…	Firmicutes	Bacilli	Lactobacillales	Enterococcaceae	Enterococcus_3
ACTCCTACGGGAGGCAGCAGTAGGGAATCTTCGGCAATGGGGGGAACCCTGACCGAGCAACGCCGCGTGAGTGAAGAAGGTTTTCGGATCGTAAAACTCTGTTGTAAGTAAAGAACGGGTGAGAGAGTGGAAAGCTCTCACTATGACGGTAACTTACCAGAAAGGGACGGCTAACTACGTGCCAGCAGCCGCGGTAATACGTAGGTCCCGAGCGTTGTCCGGATTTATTGGGCGTAAAGCGAGCGCAGGTGGTTTTTTAAGTCTGGTGTAAAAGGCTACTGCTTAACAGTAGTATGCATTGGAAACTGGAGAACTTGAGTGCAGGAGAGGAGAGTGGAATTCCATGTGTAGCGGTGAAATGCGTAGATATATGGAGGAACACCGGAGGCGAAAGCGGCT…	Firmicutes	Bacilli	Lactobacillales	Enterococcaceae	Enterococcus_3
ACTCCTACGGGAGGCAGCAGTAGGGAATCTTCGGCAATGGGCGCAAGCCTGACCGAGCAACGCCGCGTGAGTGAAGAAGGTTTTCGGATCGTAAAGCTCTGTTGATAGAGAAGAACAGGTGAGAGAGTGGAAAATTCTTGCTTTGACGGTATCTATCCAGAAAGGGACGGCTAACTACGTGCCAGCAGCCGCGGTAATACGTAGGTCCCGAGCGTTGTCCGGATTTATTGGGCGTAAAGCGAGCGCAGGTGGTTCTTTAAGTCTGATGTAAAAGGCAGTGGCTCAACCATTGTAGGCATTGGAAACTGGGGAACTTGAGTGCAGTAGAGGAGAGTGGAATTCCATGTGTAGCGGTGAAATGCGTAGATATATGGAGGAACACCGGAGGCGAAAGCGGCT…	Firmicutes	Bacilli	Lactobacillales	Streptococcaceae	Lactococcus_3
ACTCCTACGGGAGGCAGCAGTAGGGAATCTTCGGCAATGGGCGCAAGCCTGACCGAGCAACGCCGCGTGAGTGAAGAAGGTTTTCGGATCGTAAAGCTCTGTTGATAGAGAAGAACAGGTGAGAGAGTGGAAAATTCTTGCTTTGACGGTATCTATCCAGAAAGGGACGGCTAACTACGTGCCAGCAGCCGCGGTAATACGTAGGTCCCGAGCGTTGTCCGGATTTATTGGGCGTAAAGCGAGCGCAGGTGGTTCTTTAAGTCTGATGTAAAAGGCAGTGGCTCAACCATTGTAGGCATTGGAAACTGGGGAACTTGAGTGCAGTAGAGGAGAGTGGAATTCCATGTGTAGCGGTGAAATGCGTAGATATATGGAGGAACACCGGAGGCGAAAGCGGCT…	Firmicutes	Bacilli	Lactobacillales	Streptococcaceae	Lactococcus_3
ACTCCTACGGGAGGCAGCAGTGGGGAATATTGCACAATGGAGGGAACTCTGATGCAGCAACGCCGCGTGGAGGAAGACACATTTCGGTGCGTAAACTCCTTTTATATAAGAAGATAATGACGGTAATATATGAATAAGCACCGGCAAACTCCGTGCCAGCAGCCGCGGTAATACGGGGGGTGCAAGCGTTACTCGGAATCACTGGGCGTAAAGAGCGTGTAGGCGGATAAATAAGTTTGAAGTGAAATCCTATAGCTTAACTATAGAACTGCTTTGAAAACTGTTAATCTAGAATGTGGGAGAGGTAGATGGAATTTCTGGTGTAGGGGTAAAATCCGTAGAGATCAGAAGGAATACCGATTGCGAAGGCGATCTACTGGAACAATATTGACGCTGAGA…	Proteobacteria	Epsilonproteobacteria	Campylobacterales	Campylobacteraceae	Arcobacter
ACTCCTACGGGAGGCAGCAGTAGGGAATCTTCGGCAATGGGCGCAAGCCTGACCGAGCAACGCCGCGTGAGTGAAGAAGGTTTTCGGATCGTAAAGCTCTGTTGATAGAGAAGAACAGGTGAGAGAGTGGAAAATTCTTGCTTTGACGGTATCTATCCAGAAAGGGACGGCTAACTACGTGCCAGCAGCCGCGGTAATACGTAGGTCCCGAGCGTTGTCCGGATTTATTGGGCGTAAAGCGAGCGCAGGTGGTTCTTTAAGTCTGATGTAAAAGGCAGTGGCTCAACCATTGTAGGCATTGGAAACTGGGGAACTTGAGTGCAGTAGAGGAGAGTGGAATTCCATGTGTAGCGGTGAAATGCGTAGATATATGGAGGAACACCGGAGGCGAAAGCGGCT…	Firmicutes	Bacilli	Lactobacillales	Streptococcaceae	Lactococcus_3
ACTCCTACGGGAGGCAGCAGTGGGGAATTTTGGACAATGGGGGCAACCCTGATCCAGCCATGCCGCGTGAGTGAAGAAGGCCTTCGGGTTGTAAAGCTCTTTCGGCCGGGAAGAAATCGTGGAGGCTAAAACCCTTCATGGATGACGGTACCGGAACAAGAAGCACCGGCTAACTACGTGCCAGCAGCCGCGGTAATACGTAGGGTGCGAGCGTTAATCGGAATTACTGGGCGTAAAGCGTGCGCAGGCGGTTTTGTAAGACAGGCGTGAAATCCCCGGGCTCAACCTGGGAACTGCGCTTGTGACTGCAAGGCTAGAGTACGGCAGAGGGGGGTGGAATTCCACGTGTAGCAGTGAAATGCGTAGAGATGTGGAGGAACACCAATGGCGAAGGCAGCC…	Proteobacteria	Betaproteobacteria	Rhodocyclales	Rhodocyclaceae_3	Termite_cluster
ACTCCTACGGGAGGCAGCAGTAGGGAATCTTCGGCAATGGGCGCAAGCCTGACCGAGCAACGCCGCGTGAGTGAAGAAGGTTTTCGGATCGTAAAGCTCTGTTGATAGAGAAGAACAGGTGAGAGAGTGGAAAATTCTTGCTTTGACGGTATCTATCCAGAAAGGGACGGCTAACTACGTGCCAGCAGCCGCGGTAATACGTAGGTCCCGAGCGTTGTCCGGATTTATTGGGCGTAAAGCGAGCGCAGGTGGTTCTTTAAGTCTGATGTAAAAGGCAGTGGCTCAACCATTGTAGGCATTGGAAACTGGGGAACTTGAGTGCAGTAGAGGAGAGTGGAATTCCATGTGTAGCGGTGAAATGCGTAGATATATGGAGGAACACCGGAGGCGAAAGCGGCT…	Firmicutes	Bacilli	Lactobacillales	Streptococcaceae	Lactococcus_3
ACTCCTACGGGAGGCAGCAGTAGGGAATCTTCGGCAATGGGCGCAAGCCTGACCGAGCAACGCCGCGTGAGTGAAGAAGGTTTTCGGATCGTAAAGCTCTGTTGATAGAGAAGAACAGGTGAGAGAGTGGAAAATTCTTGCTTTGACGGTATCTATCCAGAAAGGGACGGCTAACTACGTGCCAGCAGCCGCGGTAATACGTAGGTCCCGAGCGTTGTCCGGATTTATTGGGCGTAAAGCGAGCGCAGGTGGTTCTTTAAGTCTGATGTAAAAGGCAGTGGCTCAACCATTGTAGGCATTGGAAACTGGGGAACTTGAGTGCAGTAGAGGAGAGTGGAATTCCATGTGTAGCGGTGAAATGCGTAGATATATGGAGGAACACCGGAGGCGAAAGCGGCT…	Firmicutes	Bacilli	Lactobacillales	Streptococcaceae	Lactococcus_3
ACTCCTACGGGAGGCAGCAGTAGGGAATCTTCGGCAATGGGCGCAAGCCTGACCGAGCAACGCCGCGTGAGTGAAGAAGGTTTTCGGATCGTAAAGCTCTGTTGATAGAGAAGAACAGGTGAGAGAGTGGAAAATTCTTGCTTTGACGGTATCTATCCAGAAAGGGACGGCTAACTACGTGCCAGCAGCCGCGGTAATACGTAGGTCCCGAGCGTTGTCCGGATTTATTGGGCGTAAAGCGAGCGCAGGTGGTTCTTTAAGTCTGATGTAAAAGGCAGTGGCTCAACCATTGTAGGCATTGGAAACTGGGGAACTTGAGTGCAGTAGAGGAGAGTGGAATTCCATGTGTAGCGGTGAAATGCGTAGATATATGGAGGAACACCGGAGGCGAAAGCGGCT…	Firmicutes	Bacilli	Lactobacillales	Streptococcaceae	Lactococcus_3
ACTCCTACGGGAGGCAGCAGTGGGGAATATTGCACAATGGAGGGAACTCTGATGCAGCAACGCCGCGTGGAGGAAGACACATTTCGGTGCGTAAACTCCTTTTATATAAGAAGATAATGACGGTAATATATGAATAAGCACCGGCAAACTCCGTGCCAGCAGCCGCGGTAATACGGGGGGTGCAAGCGTTACTCGGAATCACTGGGCGTAAAGAGCGTGTAGGCGGATAAATAAGTTTGAAGTGAAATCCTATAGCTTAACTATAGAACTGCTTTGAAAACTGTTAATCTAGAATGTGGGAGAGGTAGATGGAATTTCTGGTGTAGGGGTAAAATCCGTAGAGATCAGAAGGAATACCGATTGCGAAGGCGATCTACTGGAACAATATTGACGCTGAGA…	Proteobacteria	Epsilonproteobacteria	Campylobacterales	Campylobacteraceae	Arcobacter
ACTCCTACGGGAGGCAGCAGTGGGGAATTTTGGACAATGGGGGCAACCCTGATCCAGCCATGCCGCGTGAGTGAAGAAGGCCTTCGGGTTGTAAAGCTCTTTCGGCCGGGAAGAAATCGTGGAGGCTAAAACCCTTCATGGATGACGGTACCGGAACAAGAAGCACCGGCTAACTACGTGCCAGCAGCCGCGGTAATACGTAGGGTGCGAGCGTTAATCGGAATTACTGGGCGTAAAGCGTGCGCAGGCGGTTTTGTAAGACAGGCGTGAAATCCCCGGGCTCAACCTGGGAACTGCGCTTGTGACTGCAAGGCTAGAGTACGGCAGAGGGGGGTGGAATTCCACGTGTAGCAGTGAAATGCGTAGAGATGTGGAGGAACACCAATGGCGAAGGCAGCC…	Proteobacteria	Betaproteobacteria	Rhodocyclales	Rhodocyclaceae_3	Termite_cluster
ACTCCTACGGGAGGCAGCAGTAGGGAATCTTCGGCAATGGGCGCAAGCCTGACCGAGCAACGCCGCGTGAGTGAAGAAGGTTTTCGGATCGTAAAGCTCTGTTGATAGAGAAGAACAGGTGAGAGAGTGGAAAATTCTTGCTTTGACGGTATCTATCCAGAAAGGGACGGCTAACTACGTGCCAGCAGCCGCGGTAATACGTAGGTCCCGAGCGTTGTCCGGATTTATTGGGCGTAAAGCGAGCGCAGGTGGTTCTTTAAGTCTGATGTAAAAGGCAGTGGCTCAACCATTGTAGGCATTGGAAACTGGGGAACTTGAGTGCAGTAGAGGAGAGTGGAATTCCATGTGTAGCGGTGAAATGCGTAGATATATGGAGGAACACCGGAGGCGAAAGCGGCT…	Firmicutes	Bacilli	Lactobacillales	Streptococcaceae	Lactococcus_3
ACTCCTACGGGAGGCAGCAGTAGGGAATCTTCGGCAATGGGCGCAAGCCTGACCGAGCAACGCCGCGTGAGTGAAGAAGGTTTTCGGATCGTAAAGCTCTGTTGATAGAGAAGAACAGGTGAGAGAGTGGAAAATTCTTGCTTTGACGGTATCTATCCAGAAAGGGACGGCTAACTACGTGCCAGCAGCCGCGGTAATACGTAGGTCCCGAGCGTTGTCCGGATTTATTGGGCGTAAAGCGAGCGCAGGTGGTTCTTTAAGTCTGATGTAAAAGGCAGTGGCTCAACCATTGTAGGCATTGGAAACTGGGGAACTTGAGTGCAGTAGAGGAGAGTGGAATTCCATGTGTAGCGGTGAAATGCGTAGATATATGGAGGAACACCGGAGGCGAAAGCGGCT…	Firmicutes	Bacilli	Lactobacillales	Streptococcaceae	Lactococcus_3
ACTCCTACGGGAGGCAGCAGTGGGGAATTTTGGACAATGGGGGCAACCCTGATCCAGCCATGCCGCGTGAGTGAAGAAGGCCTTCGGGTTGTAAAGCTCTTTCGGCCGGGAAGAAATCGTGGAGGCTAAAACCCTTCATGGATGACGGTACCGGAACAAGAAGCACCGGCTAACTACGTGCCAGCAGCCGCGGTAATACGTAGGGTGCGAGCGTTAATCGGAATTACTGGGCGTAAAGCGTGCGCAGGCGGTTTTGTAAGACAGGCGTGAAATCCCCGGGCTCAACCTGGGAACTGCGCTTGTGACTGCAAGGCTAGAGTACGGCAGAGGGGGGTGGAATTCCACGTGTAGCAGTGAAATGCGTAGAGATGTGGAGGAACACCAATGGCGAAGGCAGCC…	Proteobacteria	Betaproteobacteria	Rhodocyclales	Rhodocyclaceae_3	Termite_cluster
ACTCCTACGGGAGGCAGCAGTGGGGAATATTGCACAATGGAGGGAACTCTGATGCAGCAACGCCGCGTGGAGGAAGACACATTTCGGTGCGTAAACTCCTTTTATATAAGAAGATAATGACGGTAATATATGAATAAGCACCGGCAAACTCCGTGCCAGCAGCCGCGGTAATACGGGGGGTGCAAGCGTTACTCGGAATCACTGGGCGTAAAGAGCGTGTAGGCGGATAAATAAGTTTGAAGTGAAATCCTATAGCTTAACTATAGAACTGCTTTGAAAACTGTTAATCTAGAATGTGGGAGAGGTAGATGGAATTTCTGGTGTAGGGGTAAAATCCGTAGAGATCAGAAGGAATACCGATTGCGAAGGCGATCTACTGGAACAATATTGACGCTGAGA…	Proteobacteria	Epsilonproteobacteria	Campylobacterales	Campylobacteraceae	Arcobacter
ACTCCTACGGGAGGCAGCAGTAGGGAATCTTCGGCAATGGGCGCAAGCCTGACCGAGCAACGCCGCGTGAGTGAAGAAGGTTTTCGGATCGTAAAGCTCTGTTGATAGAGAAGAACAGGTGAGAGAGTGGAAAATTCTTGCTTTGACGGTATCTATCCAGAAAGGGACGGCTAACTACGTGCCAGCAGCCGCGGTAATACGTAGGTCCCGAGCGTTGTCCGGATTTATTGGGCGTAAAGCGAGCGCAGGTGGTTCTTTAAGTCTGATGTAAAAGGCAGTGGCTCAACCATTGTAGGCATTGGAAACTGGGGAACTTGAGTGCAGTAGAGGAGAGTGGAATTCCATGTGTAGCGGTGAAATGCGTAGATATATGGAGGAACACCGGAGGCGAAAGCGGCT…	Firmicutes	Bacilli	Lactobacillales	Streptococcaceae	Lactococcus_3
ACTCCTACGGGAGGCAGCAGTGGGGAATATTGCACAATGGAGGGAACTCTGATGCAGCAACGCCGCGTGGAGGAAGACACATTTCGGTGCGTAAACTCCTTTTATATAAGAAGATAATGACGGTAATATATGAATAAGCACCGGCAAACTCCGTGCCAGCAGCCGCGGTAATACGGGGGGTGCAAGCGTTACTCGGAATCACTGGGCGTAAAGAGCGTGTAGGCGGATAAATAAGTTTGAAGTGAAATCCTATAGCTTAACTATAGAACTGCTTTGAAAACTGTTAATCTAGAATGTGGGAGAGGTAGATGGAATTTCTGGTGTAGGGGTAAAATCCGTAGAGATCAGAAGGAATACCGATTGCGAAGGCGATCTACTGGAACAATATTGACGCTGAGA…	Proteobacteria	Epsilonproteobacteria	Campylobacterales	Campylobacteraceae	Arcobacter
ACTCCTACGGGAGGCAGCAGTAGGGAATCTTCGGCAATGGGCGCAAGCCTGACCGAGCAACGCCGCGTGAGTGAAGAAGGTTTTCGGATCGTAAAGCTCTGTTGATAGAGAAGAACAGGTGAGAGAGTGGAAAATTCTTGCTTTGACGGTATCTATCCAGAAAGGGACGGCTAACTACGTGCCAGCAGCCGCGGTAATACGTAGGTCCCGAGCGTTGTCCGGATTTATTGGGCGTAAAGCGAGCGCAGGTGGTTCTTTAAGTCTGATGTAAAAGGCAGTGGCTCAACCATTGTAGGCATTGGAAACTGGGGAACTTGAGTGCAGTAGAGGAGAGTGGAATTCCATGTGTAGCGGTGAAATGCGTAGATATATGGAGGAACACCGGAGGCGAAAGCGGCT…	Firmicutes	Bacilli	Lactobacillales	Streptococcaceae	Lactococcus_3
ACTCCTACGGGAGGCAGCAGTGGGGAATATTGCACAATGGAGGGAACTCTGATGCAGCAACGCCGCGTGGAGGAAGACACATTTCGGTGCGTAAACTCCTTTTATATAAGAAGATAATGACGGTAATATATGAATAAGCACCGGCAAACTCCGTGCCAGCAGCCGCGGTAATACGGGGGGTGCAAGCGTTACTCGGAATCACTGGGCGTAAAGAGCGTGTAGGCGGATAAATAAGTTTGAAGTGAAATCCTATAGCTTAACTATAGAACTGCTTTGAAAACTGTTAATCTAGAATGTGGGAGAGGTAGATGGAATTTCTGGTGTAGGGGTAAAATCCGTAGAGATCAGAAGGAATACCGATTGCGAAGGCGATCTACTGGAACAATATTGACGCTGAGA…	Proteobacteria	Epsilonproteobacteria	Campylobacterales	Campylobacteraceae	Arcobacter
ACTCCTACGGGAGGCAGCAGTGGGGAATTTTGGACAATGGGGGCAACCCTGATCCAGCCATGCCGCGTGAGTGAAGAAGGCCTTCGGGTTGTAAAGCTCTTTCGGCCGGGAAGAAATCGTGGAGGCTAAAACCCTTCATGGATGACGGTACCGGAACAAGAAGCACCGGCTAACTACGTGCCAGCAGCCGCGGTAATACGTAGGGTGCGAGCGTTAATCGGAATTACTGGGCGTAAAGCGTGCGCAGGCGGTTTTGTAAGACAGGCGTGAAATCCCCGGGCTCAACCTGGGAACTGCGCTTGTGACTGCAAGGCTAGAGTACGGCAGAGGGGGGTGGAATTCCACGTGTAGCAGTGAAATGCGTAGAGATGTGGAGGAACACCAATGGCGAAGGCAGCC…	Proteobacteria	Betaproteobacteria	Rhodocyclales	Rhodocyclaceae_3	Termite_cluster
ACTCCTACGGGAGGCAGCAGTGGGGAATTTTGGACAATGGGGGCAACCCTGATCCAGCCATGCCGCGTGAGTGAAGAAGGCCTTCGGGTTGTAAAGCTCTTTCGGCCGGGAAGAAATCGTGGAGGCTAAAACCCTTCATGGATGACGGTACCGGAACAAGAAGCACCGGCTAACTACGTGCCAGCAGCCGCGGTAATACGTAGGGTGCGAGCGTTAATCGGAATTACTGGGCGTAAAGCGTGCGCAGGCGGTTTTGTAAGACAGGCGTGAAATCCCCGGGCTCAACCTGGGAACTGCGCTTGTGACTGCAAGGCTAGAGTACGGCAGAGGGGGGTGGAATTCCACGTGTAGCAGTGAAATGCGTAGAGATGTGGAGGAACACCAATGGCGAAGGCAGCC…	Proteobacteria	Betaproteobacteria	Rhodocyclales	Rhodocyclaceae_3	Termite_cluster
ACTCCTACGGGAGGCAGCAGTAGGGAATCTTCGGCAATGGGCGCAAGCCTGACCGAGCAACGCCGCGTGAGTGAAGAAGGTTTTCGGATCGTAAAGCTCTGTTGATAGAGAAGAACAGGTGAGAGAGTGGAAAATTCTTGCTTTGACGGTATCTATCCAGAAAGGGACGGCTAACTACGTGCCAGCAGCCGCGGTAATACGTAGGTCCCGAGCGTTGTCCGGATTTATTGGGCGTAAAGCGAGCGCAGGTGGTTCTTTAAGTCTGATGTAAAAGGCAGTGGCTCAACCATTGTAGGCATTGGAAACTGGGGAACTTGAGTGCAGTAGAGGAGAGTGGAATTCCATGTGTAGCGGTGAAATGCGTAGATATATGGAGGAACACCGGAGGCGAAAGCGGCT…	Firmicutes	Bacilli	Lactobacillales	Streptococcaceae	Anthococcus
ACTCCTACGGGAGGCAGCAGTGGGGAATTTTGGACAATGGGGGCAACCCTGATCCAGCCATGCCGCGTGAGTGAAGAAGGCCTTCGGGTTGTAAAGCTCTTTCGGCCGGGAAGAAATCGTGGAGGCTAAAACCCTTCATGGATGACGGTACCGGAACAAGAAGCACCGGCTAACTACGTGCCAGCAGCCGCGGTAATACGTAGGGTGCGAGCGTTAATCGGAATTACTGGGCGTAAAGCGTGCGCAGGCGGTTTTGTAAGACAGGCGTGAAATCCCCGGGCTCAACCTGGGAACTGCGCTTGTGACTGCAAGGCTAGAGTACGGCAGAGGGGGGTGGAATTCCACGTGTAGCAGTGAAATGCGTAGAGATGTGGAGGAACACCAATGGCGAAGGCAGCC…	Proteobacteria	Betaproteobacteria	Rhodocyclales	Rhodocyclaceae_3	Termite_cluster
ACTCCTACGGGAGGCAGCAGTGGGGAATTTTGGACAATGGGGGCAACCCTGATCCAGCCATGCCGCGTGAGTGAAGAAGGCCTTCGGGTTGTAAAGCTCTTTCGGCCGGGAAGAAATCGTGGAGGCTAAAACCCTTCATGGATGACGGTACCGGAACAAGAAGCACCGGCTAACTACGTGCCAGCAGCCGCGGTAATACGTAGGGTGCGAGCGTTAATCGGAATTACTGGGCGTAAAGCGTGCGCAGGCGGTTTTGTAAGACAGGCGTGAAATCCCCGGGCTCAACCTGGGAACTGCGCTTGTGACTGCAAGGCTAGAGTACGGCAGAGGGGGGTGGAATTCCACGTGTAGCAGTGAAATGCGTAGAGATGTGGAGGAACACCAATGGCGAAGGCAGCC…	Proteobacteria	Betaproteobacteria	Rhodocyclales	Rhodocyclaceae_3	Termite_cluster
ACTCCTACGGGAGGCAGCAGTGGGGAATATTGCACAATGGAGGGAACTCTGATGCAGCAACGCCGCGTGGAGGAAGACACATTTCGGTGCGTAAACTCCTTTTATATAAGAAGATAATGACGGTAATATATGAATAAGCACCGGCAAACTCCGTGCCAGCAGCCGCGGTAATACGGGGGGTGCAAGCGTTACTCGGAATCACTGGGCGTAAAGAGCGTGTAGGCGGATAAATAAGTTTGAAGTGAAATCCTATAGCTTAACTATAGAACTGCTTTGAAAACTGTTAATCTAGAATGTGGGAGAGGTAGATGGAATTTCTGGTGTAGGGGTAAAATCCGTAGAGATCAGAAGGAATACCGATTGCGAAGGCGATCTACTGGAACAATATTGACGCTGAGA…	Proteobacteria	Epsilonproteobacteria	Campylobacterales	Campylobacteraceae	Arcobacter
ACTCCTACGGGAGGCAGCAGTAGGGAATCTTCGGCAATGGGCGCAAGCCTGACCGAGCAACGCCGCGTGAGTGAAGAAGGTTTTCGGATCGTAAAGCTCTGTTGATAGAGAAGAACAGGTGAGAGAGTGGAAAATTCTTGCTTTGACGGTATCTATCCAGAAAGGGACGGCTAACTACGTGCCAGCAGCCGCGGTAATACGTAGGTCCCGAGCGTTGTCCGGATTTATTGGGCGTAAAGCGAGCGCAGGTGGTTCTTTAAGTCTGATGTAAAAGGCAGTGGCTCAACCATTGTAGGCATTGGAAACTGGGGAACTTGAGTGCAGTAGAGGAGAGTGGAATTCCATGTGTAGCGGTGAAATGCGTAGATATATGGAGGAACACCGGAGGCGAAAGCGGCT…	Firmicutes	Bacilli	Lactobacillales	Streptococcaceae	Lactococcus_3
ACTCCTACGGGAGGCAGCAGTAGGGAATCTTCGGCAATGGGCGCAAGCCTGACCGAGCAACGCCGCGTGAGTGAAGAAGGTTTTCGGATCGTAAAGCTCTGTTGATAGAGAAGAACAGGTGAGAGAGTGGAAAATTCTTGCTTTGACGGTATCTATCCAGAAAGGGACGGCTAACTACGTGCCAGCAGCCGCGGTAATACGTAGGTCCCGAGCGTTGTCCGGATTTATTGGGCGTAAAGCGAGCGCAGGTGGTTCTTTAAGTCTGATGTAAAAGGCAGTGGCTCAACCATTGTAGGCATTGGAAACTGGGGAACTTGAGTGCAGTAGAGGAGAGTGGAATTCCATGTGTAGCGGTGAAATGCGTAGATATATGGAGGAACACCGGAGGCGAAAGCGGCT…	Firmicutes	Bacilli	Lactobacillales	Streptococcaceae	Lactococcus_3
ACTCCTACGGGAGGCAGCAGTGGGGAATATTGCACAATGGAGGGAACTCTGATGCAGCAACGCCGCGTGGAGGAAGACACATTTCGGTGCGTAAACTCCTTTTATATAAGAAGATAATGACGGTAATATATGAATAAGCACCGGCAAACTCCGTGCCAGCAGCCGCGGTAATACGGGGGGTGCAAGCGTTACTCGGAATCACTGGGCGTAAAGAGCGTGTAGGCGGATAAATAAGTTTGAAGTGAAATCCTATAGCTTAACTATAGAACTGCTTTGAAAACTGTTAATCTAGAATGTGGGAGAGGTAGATGGAATTTCTGGTGTAGGGGTAAAATCCGTAGAGATCAGAAGGAATACCGATTGCGAAGGCGATCTACTGGAACAATATTGACGCTGAGA…	Proteobacteria	Epsilonproteobacteria	Campylobacterales	Campylobacteraceae	Arcobacter
ACTCCTACGGGAGGCAGCAGTGGGGAATATTGCACAATGGAGGGAACTCTGATGCAGCAACGCCGCGTGGAGGAAGACACATTTCGGTGCGTAAACTCCTTTTATATAAGAAGATAATGACGGTAATATATGAATAAGCACCGGCAAACTCCGTGCCAGCAGCCGCGGTAATACGGGGGGTGCAAGCGTTACTCGGAATCACTGGGCGTAAAGAGCGTGTAGGCGGATAAATAAGTTTGAAGTGAAATCCTATAGCTTAACTATAGAACTGCTTTGAAAACTGTTAATCTAGAATGTGGGAGAGGTAGATGGAATTTCTGGTGTAGGGGTAAAATCCGTAGAGATCAGAAGGAATACCGATTGCGAAGGCGATCTACTGGAACAATATTGACGCTGAGA…	Proteobacteria	Epsilonproteobacteria	Campylobacterales	Campylobacteraceae	Arcobacter
ACTCCTACGGGAGGCAGCAGTGGGGAATTTTGGACAATGGGGGCAACCCTGATCCAGCCATGCCGCGTGAGTGAAGAAGGCCTTCGGGTTGTAAAGCTCTTTCGGCCGGGAAGAAATCGTGGAGGCTAAAACCCTTCATGGATGACGGTACCGGAACAAGAAGCACCGGCTAACTACGTGCCAGCAGCCGCGGTAATACGTAGGGTGCGAGCGTTAATCGGAATTACTGGGCGTAAAGCGTGCGCAGGCGGTTTTGTAAGACAGGCGTGAAATCCCCGGGCTCAACCTGGGAACTGCGCTTGTGACTGCAAGGCTAGAGTACGGCAGAGGGGGGTGGAATTCCACGTGTAGCAGTGAAATGCGTAGAGATGTGGAGGAACACCAATGGCGAAGGCAGCC…	Proteobacteria	Betaproteobacteria	Rhodocyclales	Rhodocyclaceae_3	Termite_cluster
ACTCCTACGGGAGGCAGCAGTGGGGAATTTTGGACAATGGGGGCAACCCTGATCCAGCCATGCCGCGTGAGTGAAGAAGGCCTTCGGGTTGTAAAGCTCTTTCGGCCGGGAAGAAATCGTGGAGGCTAAAACCCTTCATGGATGACGGTACCGGAACAAGAAGCACCGGCTAACTACGTGCCAGCAGCCGCGGTAATACGTAGGGTGCGAGCGTTAATCGGAATTACTGGGCGTAAAGCGTGCGCAGGCGGTTTTGTAAGACAGGCGTGAAATCCCCGGGCTCAACCTGGGAACTGCGCTTGTGACTGCAAGGCTAGAGTACGGCAGAGGGGGGTGGAATTCCACGTGTAGCAGTGAAATGCGTAGAGATGTGGAGGAACACCAATGGCGAAGGCAGCC…	Proteobacteria	Betaproteobacteria	Rhodocyclales	Rhodocyclaceae_3	Termite_cluster
ACTCCTACGGGAGGCAGCAGTAGGGAATCTTCGGCAATGGGCGCAAGCCTGACCGAGCAACGCCGCGTGAGTGAAGAAGGTTTTCGGATCGTAAAGCTCTGTTGATAGAGAAGAACAGGTGAGAGAGTGGAAAATTCTTGCTTTGACGGTATCTATCCAGAAAGGGACGGCTAACTACGTGCCAGCAGCCGCGGTAATACGTAGGTCCCGAGCGTTGTCCGGATTTATTGGGCGTAAAGCGAGCGCAGGTGGTTCTTTAAGTCTGATGTAAAAGGCAGTGGCTCAACCATTGTAGGCATTGGAAACTGGGGAACTTGAGTGCAGTAGAGGAGAGTGGAATTCCATGTGTAGCGGTGAAATGCGTAGATATATGGAGGAACACCGGAGGCGAAAGCGGCT…	Firmicutes	Bacilli	Lactobacillales	Streptococcaceae	Lactococcus_3
ACTCCTACGGGAGGCAGCAGTGGGGAATATTGCACAATGGAGGGAACTCTGATGCAGCAACGCCGCGTGGAGGAAGACACATTTCGGTGCGTAAACTCCTTTTATATAAGAAGATAATGACGGTAATATATGAATAAGCACCGGCAAACTCCGTGCCAGCAGCCGCGGTAATACGGGGGGTGCAAGCGTTACTCGGAATCACTGGGCGTAAAGAGCGTGTAGGCGGATAAATAAGTTTGAAGTGAAATCCTATAGCTTAACTATAGAACTGCTTTGAAAACTGTTAATCTAGAATGTGGGAGAGGTAGATGGAATTTCTGGTGTAGGGGTAAAATCCGTAGAGATCAGAAGGAATACCGATTGCGAAGGCGATCTACTGGAACAATATTGACGCTGAGA…	Proteobacteria	Epsilonproteobacteria	Campylobacterales	Campylobacteraceae	Arcobacter
ACTCCTACGGGAGGCAGCAGTGGGGAATATTGCACAATGGAGGGAACTCTGATGCAGCAACGCCGCGTGGAGGAAGACACATTTCGGTGCGTAAACTCCTTTTATATAAGAAGATAATGACGGTAATATATGAATAAGCACCGGCAAACTCCGTGCCAGCAGCCGCGGTAATACGGGGGGTGCAAGCGTTACTCGGAATCACTGGGCGTAAAGAGCGTGTAGGCGGATAAATAAGTTTGAAGTGAAATCCTATAGCTTAACTATAGAACTGCTTTGAAAACTGTTAATCTAGAATGTGGGAGAGGTAGATGGAATTTCTGGTGTAGGGGTAAAATCCGTAGAGATCAGAAGGAATACCGATTGCGAAGGCGATCTACTGGAACAATATTGACGCTGAGA…	Proteobacteria	Epsilonproteobacteria	Campylobacterales	Campylobacteraceae	Arcobacter
ACTCCTACGGGAGGCAGCAGTGGGGAATATTGCACAATGGAGGGAACTCTGATGCAGCAACGCCGCGTGGAGGAAGACACATTTCGGTGCGTAAACTCCTTTTATATAAGAAGATAATGACGGTAATATATGAATAAGCACCGGCAAACTCCGTGCCAGCAGCCGCGGTAATACGGGGGGTGCAAGCGTTACTCGGAATCACTGGGCGTAAAGAGCGTGTAGGCGGATAAATAAGTTTGAAGTGAAATCCTATAGCTTAACTATAGAACTGCTTTGAAAACTGTTAATCTAGAATGTGGGAGAGGTAGATGGAATTTCTGGTGTAGGGGTAAAATCCGTAGAGATCAGAAGGAATACCGATTGCGAAGGCGATCTACTGGAACAATATTGACGCTGAGA…	Proteobacteria	Epsilonproteobacteria	Campylobacterales	Campylobacteraceae	Arcobacter
ACTCCTACGGGAGGCAGCAGTGGGGAATTTTGGACAATGGGGGCAACCCTGATCCAGCCATGCCGCGTGAGTGAAGAAGGCCTTCGGGTTGTAAAGCTCTTTCGGCCGGGAAGAAATCGTGGAGGCTAAAACCCTTCATGGATGACGGTACCGGAACAAGAAGCACCGGCTAACTACGTGCCAGCAGCCGCGGTAATACGTAGGGTGCGAGCGTTAATCGGAATTACTGGGCGTAAAGCGTGCGCAGGCGGTTTTGTAAGACAGGCGTGAAATCCCCGGGCTCAACCTGGGAACTGCGCTTGTGACTGCAAGGCTAGAGTACGGCAGAGGGGGGTGGAATTCCACGTGTAGCAGTGAAATGCGTAGAGATGTGGAGGAACACCAATGGCGAAGGCAGCC…	Proteobacteria	Betaproteobacteria	Rhodocyclales	Rhodocyclaceae_3	Termite_cluster
ACTCCTACGGGAGGCAGCAGTGGGGAATATTGCACAATGGAGGGAACTCTGATGCAGCAACGCCGCGTGGAGGAAGACACATTTCGGTGCGTAAACTCCTTTTATATAAGAAGATAATGACGGTAATATATGAATAAGCACCGGCAAACTCCGTGCCAGCAGCCGCGGTAATACGGGGGGTGCAAGCGTTACTCGGAATCACTGGGCGTAAAGAGCGTGTAGGCGGATAAATAAGTTTGAAGTGAAATCCTATAGCTTAACTATAGAACTGCTTTGAAAACTGTTAATCTAGAATGTGGGAGAGGTAGATGGAATTTCTGGTGTAGGGGTAAAATCCGTAGAGATCAGAAGGAATACCGATTGCGAAGGCGATCTACTGGAACAATATTGACGCTGAGA…	Proteobacteria	Epsilonproteobacteria	Campylobacterales	Campylobacteraceae	Arcobacter
ACTCCTACGGGAGGCAGCAGTGGGGAATTTTGGACAATGGGGGCAACCCTGATCCAGCCATGCCGCGTGAGTGAAGAAGGCCTTCGGGTTGTAAAGCTCTTTCGGCCGGGAAGAAATCGTGGAGGCTAAAACCCTTCATGGATGACGGTACCGGAACAAGAAGCACCGGCTAACTACGTGCCAGCAGCCGCGGTAATACGTAGGGTGCGAGCGTTAATCGGAATTACTGGGCGTAAAGCGTGCGCAGGCGGTTTTGTAAGACAGGCGTGAAATCCCCGGGCTCAACCTGGGAACTGCGCTTGTGACTGCAAGGCTAGAGTACGGCAGAGGGGGGTGGAATTCCACGTGTAGCAGTGAAATGCGTAGAGATGTGGAGGAACACCAATGGCGAAGGCAGCC…	Proteobacteria	Betaproteobacteria	Rhodocyclales	Rhodocyclaceae_3	Termite_cluster
ACTCCTACGGGAGGCAGCAGTGGGGAATTTTGGACAATGGGGGCAACCCTGATCCAGCCATGCCGCGTGAGTGAAGAAGGCCTTCGGGTTGTAAAGCTCTTTCGGCCGGGAAGAAATCGTGGAGGCTAAAACCCTTCATGGATGACGGTACCGGAACAAGAAGCACCGGCTAACTACGTGCCAGCAGCCGCGGTAATACGTAGGGTGCGAGCGTTAATCGGAATTACTGGGCGTAAAGCGTGCGCAGGCGGTTTTGTAAGACAGGCGTGAAATCCCCGGGCTCAACCTGGGAACTGCGCTTGTGACTGCAAGGCTAGAGTACGGCAGAGGGGGGTGGAATTCCACGTGTAGCAGTGAAATGCGTAGAGATGTGGAGGAACACCAATGGCGAAGGCAGCC…	Proteobacteria	Betaproteobacteria	Rhodocyclales	Rhodocyclaceae_3	Termite_cluster
ACTCCTACGGGAGGCAGCAGTGGGGAATTTTGGACAATGGGGGCAACCCTGATCCAGCCATGCCGCGTGAGTGAAGAAGGCCTTCGGGTTGTAAAGCTCTTTCGGCCGGGAAGAAATCGTGGAGGCTAAAACCCTTCATGGATGACGGTACCGGAACAAGAAGCACCGGCTAACTACGTGCCAGCAGCCGCGGTAATACGTAGGGTGCGAGCGTTAATCGGAATTACTGGGCGTAAAGCGTGCGCAGGCGGTTTTGTAAGACAGGCGTGAAATCCCCGGGCTCAACCTGGGAACTGCGCTTGTGACTGCAAGGCTAGAGTACGGCAGAGGGGGGTGGAATTCCACGTGTAGCAGTGAAATGCGTAGAGATGTGGAGGAACACCAATGGCGAAGGCAGCC…	Proteobacteria	Betaproteobacteria	Rhodocyclales	Rhodocyclaceae_3	Termite_cluster
ACTCCTACGGGAGGCAGCAGTAGGGAATCTTCGGCAATGGGGGGAACCCTGACCGAGCAACGCCGCGTGAGTGAAGAAGGTTTTCGGATCGTAAAACTCTGTTGTAAGTAAAGAACGGATGAGAGAGTGGAAAGTTCTCATCGTGACGGTAACTTACCAGAAAGGGACGGCTAACTACGTGCCAGCAGCCGCGGTAATACGTAGGTCCCGAGCGTTGTCCGGATTTATTGGGCGTAAAGCGAGCGCAGGTGGTTTTTTAAGTCTGGTGTAAAAGGCTACTGCTTAACAGTAGTATGCATTGGAAACTGGAGAACTTGAGTGCAGGAGAGGAGAGTGGAATTCCATGTGTAGCGGTGAAATGCGTAGATATATGGAGGAACACCGGAGGCGAAAGCGGCT…	Firmicutes	Bacilli	Lactobacillales	Enterococcaceae	Enterococcus_3
ACTCCTACGGGAGGCAGCAGTGGGGAATTTTGGACAATGGGGGCAACCCTGATCCAGCCATGCCGCGTGAGTGAAGAAGGCCTTCGGGTTGTAAAGCTCTTTCGGCCGGGAAGAAATCGTGGAGGCTAAAACCCTTCATGGATGACGGTACCGGAACAAGAAGCACCGGCTAACTACGTGCCAGCAGCCGCGGTAATACGTAGGGTGCGAGCGTTAATCGGAATTACTGGGCGTAAAGCGTGCGCAGGCGGTTTTGTAAGACAGGCGTGAAATCCCCGGGCTCAACCTGGGAACTGCGCTTGTGACTGCAAGGCTAGAGTACGGCAGAGGGGGGTGGAATTCCACGTGTAGCAGTGAAATGCGTAGAGATGTGGAGGAACACCAATGGCGAAGGCAGCC…	Proteobacteria	Betaproteobacteria	Rhodocyclales	Rhodocyclaceae_3	Termite_cluster
ACTCCTACGGGAGGCAGCAGTGGGGAATATTGCACAATGGGGGAAACCCTGATGCAGCGACGCCGCGTGAGTGAAGACGGTCTTCGGATTGTAAAGCTCTGTTGCGGGGGACGATAATGACGGTACCCCGTGAGGAAGCCACGGCTAACTACGTGCCAGCAGCCGCGGTAATACGTAGGTGGCAAGCGTTGTCCGGAATTACTGGGTGTAAAGGGAGCGTAGGCGGGCAATTAAGTTGGATGTGAAATCCACAGGCTTAACCTGTGGCGTGCATCCAAAACTGAATGTCTTGAGTGATGTAGAGGCAGGCGGAATTCCTAGTGTAGCGGTGAAATGCGTAGATATTAGGAGGAACACCAGTGGCGAAGGCGGCCTGCTGGGCATTAACTGACGCTGAGG…	Firmicutes	Clostridia_1	Clostridiales	Ruminococcaceae	Insect_cluster
ACTCCTACGGGAGGCAGCAGTAGGGAATCTTCGGCAATGGGGGGAACCCTGACCGAGCAACGCCGCGTGAGTGAAGAAGGTTTTCGGATCGTAAAACTCTGTTGTAAGTAAAGAACGGATGAGAGAGTGGAAAGTTCTCATCGTGACGGTAACTTACCAGAAAGGGACGGCTAACTACGTGCCAGCAGCCGCGGTAATACGTAGGTCCCGAGCGTTGTCCGGATTTATTGGGCGTAAAGCGAGCGCAGGTGGTTTTTTAAGTCTGGTGTAAAAGGCTACTGCTTAACAGTAGTATGCATTGGAAACTGGAGAACTTGAGTGCAGGAGAGGAGAGTGGAATTCCATGTGTAGCGGTGAAATGCGTAGATATATGGAGGAACACCGGAGGCGAAAGCGGCT…	Firmicutes	Bacilli	Lactobacillales	Enterococcaceae	Enterococcus_3
ACTCCTACGGGAGGCAGCAGTGGGGAATATTGCACAATGGAGGGAACTCTGATGCAGCAACGCCGCGTGGAGGAAGACACATTTCGGTGCGTAAACTCCTTTTATATAAGAAGATAATGACGGTAATATATGAATAAGCACCGGCAAACTCCGTGCCAGCAGCCGCGGTAATACGGGGGGTGCAAGCGTTACTCGGAATCACTGGGCGTAAAGAGCGTGTAGGCGGATAAATAAGTTTGAAGTGAAATCCTATAGCTTAACTATAGAACTGCTTTGAAAACTGTTAATCTAGAATGTGGGAGAGGTAGATGGAATTTCTGGTGTAGGGGTAAAATCCGTAGAGATCAGAAGGAATACCGATTGCGAAGGCGATCTACTGGAACAATATTGACGCTGAGA…	Proteobacteria	Epsilonproteobacteria	Campylobacterales	Campylobacteraceae	Arcobacter
ACTCCTACGGGAGGCAGCAGTGGGGAATATTGCACAATGGGGGAAACCCTGATGCAGCGACGCCGCGTGAGTGAAGACGGTCTTCGGATTGTAAAGCTCTGTTGCGGGGGACGATAATGACGGTACCCCGTGAGGAAGCCACGGCTAACTACGTGCCAGCAGCCGCGGTAATACGTAGGTGGCAAGCGTTGTCCGGAATTACTGGGTGTAAAGGGAGCGTAGGCGGGCAATTAAGTTGGATGTGAAATCCACAGGCTTAACCTGTGGCGTGCATCCAAAACTGAATGTCTTGAGTGATGTAGAGGCAGGCGGAATTCCTAGTGTAGCGGTGAAATGCGTAGATATTAGGAGGAACACCAGTGGCGAAGGCGGCCTGCTGGGCATTAACTGACGCTGAGG…	Firmicutes	Clostridia_1	Clostridiales	Ruminococcaceae	Insect_cluster
ACTCCTACGGGAGGCAGCAGTGGGGAATTTTGGACAATGGGCGAAAGCCTGATCCAGCAATGCCGCGTGTGTGAAGAAGGCCTTCGGGTTGTAAAGCACTTTTGTCCGGAAAGAAATCCTTGGCTCTAATACAGTCGGGGGATGACGGTACCGGAAGAATAAGCACCGGCTAACTACGTGCCAGCAGCCGCGGTAATACGTAGGGTGCGAGCGTTAATCGGAATTACTGGGCGTAAAGCGTGCGCAGGCGGTTTGCTAAGACCGATGTGAAATCCCCGGGCTCAACCTGGGAACTGCATTGGTGACTGGCAGGCTAGAGTATGGCAGAGGGGGGTAGAATTCCACGTGTAGCAGTGAAATGCGTAGAGATGTGGAGGAATACCGATGGCGAAGGCAGCC…	Proteobacteria	Betaproteobacteria	Rhodocyclales	Rhodocyclaceae_3	Termite_cluster
ACTCCTACGGGAGGCAGCAGTGGGGAATATTGCACAATGGAGGGAACTCTGATGCAGCAACGCCGCGTGGAGGAAGACACATTTCGGTGCGTAAACTCCTTTTATATAAGAAGATAATGACGGTAATATATGAATAAGCACCGGCAAACTCCGTGCCAGCAGCCGCGGTAATACGGGGGGTGCAAGCGTTACTCGGAATCACTGGGCGTAAAGAGCGTGTAGGCGGATAAATAAGTTTGAAGTGAAATCCTATAGCTTAACTATAGAACTGCTTTGAAAACTGTTAATCTAGAATGTGGGAGAGGTAGATGGAATTTCTGGTGTAGGGGTAAAATCCGTAGAGATCAGAAGGAATACCGATTGCGAAGGCGATCTACTGGAACAATATTGACGCTGAGA…	Proteobacteria	Epsilonproteobacteria	Campylobacterales	Campylobacteraceae	Arcobacter
ACTCCTACGGGAGGCAGCAGTGGGGAATTTTGGACAATGGGGGCAACCCTGATCCAGCCATGCCGCGTGAGTGAAGAAGGCCTTCGGGTTGTAAAGCTCTTTCGGCCGGGAAGAAATCGTGGAGGCTAAAACCCTTCATGGATGACGGTACCGGAACAAGAAGCACCGGCTAACTACGTGCCAGCAGCCGCGGTAATACGTAGGGTGCGAGCGTTAATCGGAATTACTGGGCGTAAAGCGTGCGCAGGCGGTTTTGTAAGACAGGCGTGAAATCCCCGGGCTCAACCTGGGAACTGCGCTTGTGACTGCAAGGCTAGAGTACGGCAGAGGGGGGTGGAATTCCACGTGTAGCAGTGAAATGCGTAGAGATGTGGAGGAACACCAATGGCGAAGGCAGCC…	Proteobacteria	Betaproteobacteria	Rhodocyclales	Rhodocyclaceae_3	Termite_cluster
ACTCCTACGGGAGGCAGCAGTAGGGAATCTTCGGCAATGGGGGGAACCCTGACCGAGCAACGCCGCGTGAGTGAAGAAGGTTTTCGGATCGTAAAACTCTGTTGTAAGTAAAGAACGGATGAGAGAGTGGAAAGTTCTCATCGTGACGGTAACTTACCAGAAAGGGACGGCTAACTACGTGCCAGCAGCCGCGGTAATACGTAGGTCCCGAGCGTTGTCCGGATTTATTGGGCGTAAAGCGAGCGCAGGTGGTTTTTTAAGTCTGGTGTAAAAGGCTACTGCTTAACAGTAGTATGCATTGGAAACTGGAGAACTTGAGTGCAGGAGAGGAGAGTGGAATTCCATGTGTAGCGGTGAAATGCGTAGATATATGGAGGAACACCGGAGGCGAAAGCGGCT…	Firmicutes	Bacilli	Lactobacillales	Enterococcaceae	Enterococcus_3
ACTCCTACGGGAGGCAGCAGTGGGGAATTTTGCGCAATGGGCGAAAGCCTGACGCAGCAACGCCGCGTGCGGGATGAAGGCCTTCGGGTTGTAAACCGCTTTCAGCAGGGAAGATTATGACGGTACCTGCAGAAGAAGCTCCGGCTAACTACGTGCCAGCAGCCGCGGTAATACGTAGGGAGCAAGCGTTATCCGGATTCATTGGGCGTAAAGAGCGCGTAGGCGGCTTGTTAAGTCAGGTGTCAAATCCGAGGGCTCAACCCCCGGCCGCACCTGAAACTGGCAGGCTTGAGTTCGGTAGAGGAAGGTGGAATTCCCAGTGTAGCGGTGGAATGCGCAGATATTGGGAAGAACACCGGTGGCGAAGGCGGCCTTCTGGGCCGTAACTGACGCTGAGGC…	Actinobacteria	Actinobacteria	Coriobacteriales	Coriobacteriaceae	Uncultured_10
ACTCCTACGGGAGGCAGCAGTAGGGAATCTTCGGCAATGGGGGGAACCCTGACCGAGCAACGCCGCGTGAGTGAAGAAGGTTTTCGGATCGTAAAACTCTGTTGTAAGTAAAGAACGGATGAGAGAGTGGAAAGTTCTCATCGTGACGGTAACTTACCAGAAAGGGACGGCTAACTACGTGCCAGCAGCCGCGGTAATACGTAGGTCCCGAGCGTTGTCCGGATTTATTGGGCGTAAAGCGAGCGCAGGTGGTTTTTTAAGTCTGGTGTAAAAGGCTACTGCTTAACAGTAGTATGCATTGGAAACTGGAGAACTTGAGTGCAGGAGAGGAGAGTGGAATTCCATGTGTAGCGGTGAAATGCGTAGATATATGGAGGAACACCGGAGGCGAAAGCGGCT…	Firmicutes	Bacilli	Lactobacillales	Enterococcaceae	Enterococcus_3
ACTCCTACGGGAGGCAGCAGTGGGGAATATTGCACAATGGAGGGAACTCTGATGCAGCAACGCCGCGTGGAGGAAGACACATTTCGGTGCGTAAACTCCTTTTATATAAGAAGATAATGACGGTAATATATGAATAAGCACCGGCAAACTCCGTGCCAGCAGCCGCGGTAATACGGGGGGTGCAAGCGTTACTCGGAATCACTGGGCGTAAAGAGCGTGTAGGCGGATAAATAAGTTTGAAGTGAAATCCTATAGCTTAACTATAGAACTGCTTTGAAAACTGTTAATCTAGAATGTGGGAGAGGTAGATGGAATTTCTGGTGTAGGGGTAAAATCCGTAGAGATCAGAAGGAATACCGATTGCGAAGGCGATCTACTGGAACAATATTGACGCTGAGA…	Proteobacteria	Epsilonproteobacteria	Campylobacterales	Campylobacteraceae	Arcobacter
ACTCCTACGGGAGGCAGCAGTAGGGAATCTTCGGCAATGGGGGGAACCCTGACCGAGCAACGCCGCGTGAGTGAAGAAGGTTTTCGGATCGTAAAACTCTGTTGTAAGTAAAGAACGGATGAGAGAGTGGAAAGTTCTCATCGTGACGGTAACTTACCAGAAAGGGACGGCTAACTACGTGCCAGCAGCCGCGGTAATACGTAGGTCCCGAGCGTTGTCCGGATTTATTGGGCGTAAAGCGAGCGCAGGTGGTTTTTTAAGTCTGGTGTAAAAGGCTACTGCTTAACAGTAGTATGCATTGGAAACTGGAGAACTTGAGTGCAGGAGAGGAGAGTGGAATTCCATGTGTAGCGGTGAAATGCGTAGATATATGGAGGAACACCGGAGGCGAAAGCGGCT…	Firmicutes	Bacilli	Lactobacillales	Enterococcaceae	Enterococcus_3
ACTCCTACGGGAGGCAGCAGTGGGGAATTTTGCGCAATGGGCGAAAGCCTGACGCAGCAACGCCGCGTGCGGGATGAAGGCCTTCGGGTTGTAAACCGCTTTCAGCAGGGAAGATTATGACGGTACCTGCAGAAGAAGCTCCGGCTAACTACGTGCCAGCAGCCGCGGTAATACGTAGGGAGCAAGCGTTATCCGGATTCATTGGGCGTAAAGAGCGCGTAGGCGGCTTGTTAAGTCAGGTGTCAAATCCGAGGGCTCAACCCCCGGCCGCACCTGAAACTGGCAGGCTTGAGTTCGGTAGAGGAAGGTGGAATTCCCAGTGTAGCGGTGGAATGCGCAGATATTGGGAAGAACACCGGTGGCGAAGGCGGCCTTCTGGGCCGTAACTGACGCTGAGGC…	Actinobacteria	Actinobacteria	Coriobacteriales	Coriobacteriaceae	Uncultured_10
ACTCCTACGGGAGGCAGCAGTAGGGAATCTTCGGCAATGGGGGGAACCCTGACCGAGCAACGCCGCGTGAGTGAAGAAGGTTTTCGGATCGTAAAACTCTGTTGTAAGTAAAGAACGGATGAGAGAGTGGAAAGTTCTCATCGTGACGGTAACTTACCAGAAAGGGACGGCTAACTACGTGCCAGCAGCCGCGGTAATACGTAGGTCCCGAGCGTTGTCCGGATTTATTGGGCGTAAAGCGAGCGCAGGTGGTTTTTTAAGTCTGGTGTAAAAGGCTACTGCTTAACAGTAGTATGCATTGGAAACTGGAGAACTTGAGTGCAGGAGAGGAGAGTGGAATTCCATGTGTAGCGGTGAAATGCGTAGATATATGGAGGAACACCGGAGGCGAAAGCGGCT…	Firmicutes	Bacilli	Lactobacillales	Enterococcaceae	Enterococcus_3
ACTCCTACGGGAGGCAGCAGTGGGGAATATTGCACAATGGGGGAAACCCTGATGCAGCGACGCCGCGTGAGTGAAGACGGTCTTCGGATTGTAAAGCTCTGTTGCGGGGGACGATAATGACGGTACCCCGTGAGGAAGCCACGGCTAACTACGTGCCAGCAGCCGCGGTAATACGTAGGTGGCAAGCGTTGTCCGGAATTACTGGGTGTAAAGGGAGCGTAGGCGGGCAATTAAGTTGGATGTGAAATCCACAGGCTTAACCTGTGGCGTGCATCCAAAACTGAATGTCTTGAGTGATGTAGAGGCAGGCGGAATTCCTAGTGTAGCGGTGAAATGCGTAGATATTAGGAGGAACACCAGTGGCGAAGGCGGCCTGCTGGGCATTAACTGACGCTGAGG…	Firmicutes	Clostridia_1	Clostridiales	Ruminococcaceae	Insect_cluster
ACTCCTACGGGAGGCAGCAGTGGGGAATATTGCACAATGGAGGGAACTCTGATGCAGCAACGCCGCGTGGAGGAAGACACATTTCGGTGCGTAAACTCCTTTTATATAAGAAGATAATGACGGTAATATATGAATAAGCACCGGCAAACTCCGTGCCAGCAGCCGCGGTAATACGGGGGGTGCAAGCGTTACTCGGAATCACTGGGCGTAAAGAGCGTGTAGGCGGATAAATAAGTTTGAAGTGAAATCCTATAGCTTAACTATAGAACTGCTTTGAAAACTGTTAATCTAGAATGTGGGAGAGGTAGATGGAATTTCTGGTGTAGGGGTAAAATCCGTAGAGATCAGAAGGAATACCGATTGCGAAGGCGATCTACTGGAACAATATTGACGCTGAGA…	Proteobacteria	Epsilonproteobacteria	Campylobacterales	Campylobacteraceae	Arcobacter
ACTCCTACGGGAGGCAGCAGTAGGGAATCTTCGGCAATGGGGGGAACCCTGACCGAGCAACGCCGCGTGAGTGAAGAAGGTTTTCGGATCGTAAAACTCTGTTGTAAGTAAAGAACGGATGAGAGAGTGGAAAGTTCTCATCGTGACGGTAACTTACCAGAAAGGGACGGCTAACTACGTGCCAGCAGCCGCGGTAATACGTAGGTCCCGAGCGTTGTCCGGATTTATTGGGCGTAAAGCGAGCGCAGGTGGTTTTTTAAGTCTGGTGTAAAAGGCTACTGCTTAACAGTAGTATGCATTGGAAACTGGAGAACTTGAGTGCAGGAGAGGAGAGTGGAATTCCATGTGTAGCGGTGAAATGCGTAGATATATGGAGGAACACCGGAGGCGAAAGCGGCT…	Firmicutes	Bacilli	Lactobacillales	Enterococcaceae	Enterococcus_3
ACTCCTACGGGAGGCAGCAGTGGGGAATTTTGGACAATGGGCGAAAGCCTGATCCAGCAATGCCGCGTGTGTGAAGAAGGCCTTCGGGTTGTAAAGCACTTTTGTCCGGAAAGAAATCCTTGGCTCTAATACAGTCGGGGGATGACGGTACCGGAAGAATAAGCACCGGCTAACTACGTGCCAGCAGCCGCGGTAATACGTAGGGTGCGAGCGTTAATCGGAATTACTGGGCGTAAAGCGTGCGCAGGCGGTTTGCTAAGACCGATGTGAAATCCCCGGGCTCAACCTGGGAACTGCATTGGTGACTGGCAGGCTAGAGTATGGCAGAGGGGGGTAGAATTCCACGTGTAGCAGTGAAATGCGTAGAGATGTGGAGGAATACCGATGGCGAAGGCAGCC…	Proteobacteria	Betaproteobacteria	Rhodocyclales	Rhodocyclaceae_3	Termite_cluster
ACTCCTACGGGAGGCAGCAGTGGGGAATATTGCACAATGGAGGGAACTCTGATGCAGCAACGCCGCGTGGAGGAAGACACATTTCGGTGCGTAAACTCCTTTTATATAAGAAGATAATGACGGTAATATATGAATAAGCACCGGCAAACTCCGTGCCAGCAGCCGCGGTAATACGGGGGGTGCAAGCGTTACTCGGAATCACTGGGCGTAAAGAGCGTGTAGGCGGATAAATAAGTTTGAAGTGAAATCCTATAGCTTAACTATAGAACTGCTTTGAAAACTGTTAATCTAGAATGTGGGAGAGGTAGATGGAATTTCTGGTGTAGGGGTAAAATCCGTAGAGATCAGAAGGAATACCGATTGCGAAGGCGATCTACTGGAACAATATTGACGCTGAGA…	Proteobacteria	Epsilonproteobacteria	Campylobacterales	Campylobacteraceae	Arcobacter
ACTCCTACGGGAGGCAGCAGTGGGGAATTTTGGACAATGGGGGCAACCCTGATCCAGCCATGCCGCGTGAGTGAAGAAGGCCTTCGGGTTGTAAAGCTCTTTCGGCCGGGAAGAAATCGTGGAGGCTAAAACCCTTCATGGATGACGGTACCGGAACAAGAAGCACCGGCTAACTACGTGCCAGCAGCCGCGGTAATACGTAGGGTGCGAGCGTTAATCGGAATTACTGGGCGTAAAGCGTGCGCAGGCGGTTTTGTAAGACAGGCGTGAAATCCCCGGGCTCAACCTGGGAACTGCGCTTGTGACTGCAAGGCTAGAGTACGGCAGAGGGGGGTGGAATTCCACGTGTAGCAGTGAAATGCGTAGAGATGTGGAGGAACACCAATGGCGAAGGCAGCC…	Proteobacteria	Betaproteobacteria	Rhodocyclales	Rhodocyclaceae_3	Termite_cluster
ACTCCTACGGGAGGCAGCAGTAGGGAATCTTCGGCAATGGGGGGGACCCTGACCGAGCAACGCCGCGTGAGTGAAGAAGGTTTTCGGATCGTAAAACTCTGTTGTAAGTAAAGAACGGGTGAGAGAGTGGAAAGCTCTCACTATGACGGTAACTTACCAGAAAGGGACGGCTAACTACGTGCCAGCAGCCGCGGTAATACGTAGGTCCCGAGCGTTGTCCGGATTTATTGGGCGTAAAGCGAGCGCAGGTGGTTTTTTAAGTCTGGTGTAAAAGGCTACTGCTTAACAGTAGTATGCATTGGAAACTGGAGAACTTGAGTGCAGGAGAGGAGAGTGGAATTCCATGTGTAGCGGTGAAATGCGTAGATATATGGAGGAACACCGGAGGCGAAAGCGGCT…	Firmicutes	Bacilli	Lactobacillales	Enterococcaceae	Enterococcus_3
ACTCCTACGGGAGGCAGCAGTAGGGAATCTTCGGCAATGGGGGGAACCCTGACCGAGCAACGCCGCGTGAGTGAAGAAGGTTTTCGGATCGTAAAACTCTGTTGTAAGTAAAGAACGGATGAGAGAGTGGAAAGTTCTCATCGTGACGGTAACTTACCAGAAAGGGACGGCTAACTACGTGCCAGCAGCCGCGGTAATACGTAGGTCCCGAGCGTTGTCCGGATTTATTGGGCGTAAAGCGAGCGCAGGTGGTTTTTTAAGTCTGGTGTAAAAGGCTACTGCTTAACAGTAGTATGCATTGGAAACTGGAGAACTTGAGTGCAGGAGAGGAGAGTGGAATTCCATGTGTAGCGGTGAAATGCGTAGATATATGGAGGAACACCGGAGGCGAAAGCGGCT…	Firmicutes	Bacilli	Lactobacillales	Enterococcaceae	Enterococcus_3
ACTCCTACGGGAGGCAGCAGTAGGGAATCTTCGGCAATGGGGGGAACCCTGACCGAGCAACGCCGCGTGAGTGAAGAAGGTTTTCGGATCGTAAAACTCTGTTGTAAGTAAAGAACGGATGAGAGAGTGGAAAGTTCTCATCGTGACGGTAACTTACCAGAAAGGGACGGCTAACTACGTGCCAGCAGCCGCGGTAATACGTAGGTCCCGAGCGTTGTCCGGATTTATTGGGCGTAAAGCGAGCGCAGGTGGTTTTTTAAGTCTGGTGTAAAAGGCTACTGCTTAACAGTAGTATGCATTGGAAACTGGAGAACTTGAGTGCAGGAGAGGAGAGTGGAATTCCATGTGTAGCGGTGAAATGCGTAGATATATGGAGGAACACCGGAGGCGAAAGCGGCT…	Firmicutes	Bacilli	Lactobacillales	Enterococcaceae	Enterococcus_3
ACTCCTACGGGAGGCAGCAGTAGGGAATCTTCGGCAATGGGGGGAACCCTGACCGAGCAACGCCGCGTGAGTGAAGAAGGTTTTCGGATCGTAAAACTCTGTTGTAAGTAAAGAACGGATGAGAGAGTGGAAAGTTCTCATCGTGACGGTAACTTACCAGAAAGGGACGGCTAACTACGTGCCAGCAGCCGCGGTAATACGTAGGTCCCGAGCGTTGTCCGGATTTATTGGGCGTAAAGCGAGCGCAGGTGGTTTTTTAAGTCTGGTGTAAAAGGCTACTGCTTAACAGTAGTATGCATTGGAAACTGGAGAACTTGAGTGCAGGAGAGGAGAGTGGAATTCCATGTGTAGCGGTGAAATGCGTAGATATATGGAGGAACACCGGAGGCGAAAGCGGCT…	Firmicutes	Bacilli	Lactobacillales	Enterococcaceae	Enterococcus_3
ACTCCTACGGGAGGCAGCAGTGGGGAATATTGCACAATGGAGGGAACTCTGATGCAGCAACGCCGCGTGGAGGAAGACACATTTCGGTGCGTAAACTCCTTTTATATAAGAAGATAATGACGGTAATATATGAATAAGCACCGGCAAACTCCGTGCCAGCAGCCGCGGTAATACGGGGGGTGCAAGCGTTACTCGGAATCACTGGGCGTAAAGAGCGTGTAGGCGGATAAATAAGTTTGAAGTGAAATCCTATAGCTTAACTATAGAACTGCTTTGAAAACTGTTAATCTAGAATGTGGGAGAGGTAGATGGAATTTCTGGTGTAGGGGTAAAATCCGTAGAGATCAGAAGGAATACCGATTGCGAAGGCGATCTACTGGAACAATATTGACGCTGAGA…	Proteobacteria	Epsilonproteobacteria	Campylobacterales	Campylobacteraceae	Arcobacter
ACTCCTACGGGAGGCAGCAGTAGGGAATCTTCGGCAATGGGGGGAACCCTGACCGAGCAACGCCGCGTGAGTGAAGAAGGTTTTCGGATCGTAAAACTCTGTTGTAAGTAAAGAACGGATGAGAGAGTGGAAAGTTCTCATCGTGACGGTAACTTACCAGAAAGGGACGGCTAACTACGTGCCAGCAGCCGCGGTAATACGTAGGTCCCGAGCGTTGTCCGGATTTATTGGGCGTAAAGCGAGCGCAGGTGGTTTTTTAAGTCTGGTGTAAAAGGCTACTGCTTAACAGTAGTATGCATTGGAAACTGGAGAACTTGAGTGCAGGAGAGGAGAGTGGAATTCCATGTGTAGCGGTGAAATGCGTAGATATATGGAGGAACACCGGAGGCGAAAGCGGCT…	Firmicutes	Bacilli	Lactobacillales	Enterococcaceae	Enterococcus_3
ACTCCTACGGGAGGCAGCAGTGGGGAATTTTGGACAATGGGCGAAAGCCTGATCCAGCAATGCCGCGTGTGTGAAGAAGGCCTTCGGGTTGTAAAGCACTTTTGTCCGGAAAGAAATCCTTGGCTCTAATACAGTCGGGGGATGACGGTACCGGAAGAATAAGCACCGGCTAACTACGTGCCAGCAGCCGCGGTAATACGTAGGGTGCGAGCGTTAATCGGAATTACTGGGCGTAAAGCGTGCGCAGGCGGTTTGCTAAGACCGATGTGAAATCCCCGGGCTCAACCTGGGAACTGCATTGGTGACTGGCAGGCTAGAGTATGGCAGAGGGGGGTAGAATTCCACGTGTAGCAGTGAAATGCGTAGAGATGTGGAGGAATACCGATGGCGAAGGCAGCC…	Proteobacteria	Betaproteobacteria	Rhodocyclales	Rhodocyclaceae_3	Termite_cluster
ACTCCTACGGGAGGCAGCAGTGGGGAATATTGCACAATGGGGGAAACCCTGATGCAGCGACGCCGCGTGAGTGAAGACGGTCTTCGGATTGTAAAGCTCTGTTGCGGGGGACGATAATGACGGTACCCCGTGAGGAAGCCACGGCTAACTACGTGCCAGCAGCCGCGGTAATACGTAGGTGGCAAGCGTTGTCCGGAATTACTGGGTGTAAAGGGAGCGTAGGCGGGCAATTAAGTTGGATGTGAAATCCACAGGCTTAACCTGTGGCGTGCATCCAAAACTGAATGTCTTGAGTGATGTAGAGGCAGGCGGAATTCCTAGTGTAGCGGTGAAATGCGTAGATATTAGGAGGAACACCAGTGGCGAAGGCGGCCTGCTGGGCATTAACTGACGCTGAGG…	Firmicutes	Clostridia_1	Clostridiales	Ruminococcaceae	Insect_cluster
ACTCCTACGGGAGGCAGCAGTGGGGAATATTGCACAATGGGGGAAACCCTGATGCAGCGACGCCGCGTGAGTGAAGACGGTCTTCGGATTGTAAAGCTCTGTTGCGGGGGACGATAATGACGGTACCCCGTGAGGAAGCCACGGCTAACTACGTGCCAGCAGCCGCGGTAATACGTAGGTGGCAAGCGTTGTCCGGAATTACTGGGTGTAAAGGGAGCGTAGGCGGGCAATTAAGTTGGATGTGAAATCCACAGGCTTAACCTGTGGCGTGCATCCAAAACTGAATGTCTTGAGTGATGTAGAGGCAGGCGGAATTCCTAGTGTAGCGGTGAAATGCGTAGATATTAGGAGGAACACCAGTGGCGAAGGCGGCCTGCTGGGCATTAACTGACGCTGAGG…	Firmicutes	Clostridia_1	Clostridiales	Ruminococcaceae	Insect_cluster
ACTCCTACGGGAGGCAGCAGTGGGGAATTTTGCGCAATGGGCGAAAGCCTGACGCAGCAACGCCGCGTGCGGGATGAAGGCCTTCGGGTTGTAAACCGCTTTCAGCAGGGAAGATTATGACGGTACCTGCAGAAGAAGCTCCGGCTAACTACGTGCCAGCAGCCGCGGTAATACGTAGGGAGCAAGCGTTATCCGGATTCATTGGGCGTAAAGAGCGCGTAGGCGGCTTGTTAAGTCAGGTGTCAAATCCGAGGGCTCAACCCCCGGCCGCACCTGAAACTGGCAGGCTTGAGTTCGGTAGAGGAAGGTGGAATTCCCAGTGTAGCGGTGGAATGCGCAGATATTGGGAAGAACACCGGTGGCGAAGGCGGCCTTCTGGGCCGTAACTGACGCTGAGGC…	Actinobacteria	Actinobacteria	Coriobacteriales	Coriobacteriaceae	Uncultured_10
ACTCCTACGGGAGGCAGCAGTAGGGAATCTTCGGCAATGGGGGGAACCCTGACCGAGCAACGCCGCGTGAGTGAAGAAGGTTTTCGGATCGTAAAACTCTGTTGTAAGTAAAGAACGGATGAGAGAGTGGAAAGTTCTCATCGTGACGGTAACTTACCAGAAAGGGACGGCTAACTACGTGCCAGCAGCCGCGGTAATACGTAGGTCCCGAGCGTTGTCCGGATTTATTGGGCGTAAAGCGAGCGCAGGTGGTTTTTTAAGTCTGGTGTAAAAGGCTACTGCTTAACAGTAGTATGCATTGGAAACTGGAGAACTTGAGTGCAGGAGAGGAGAGTGGAATTCCATGTGTAGCGGTGAAATGCGTAGATATATGGAGGAACACCGGAGGCGAAAGCGGCT…	Firmicutes	Bacilli	Lactobacillales	Enterococcaceae	Enterococcus_3
ACTCCTACGGGAGGCAGCAGTGAGGAATATTGGTCAATGGGCGAGAGCCTGAACCAGCCAAATCGCGTGAAGGAAGACTGCCTTATGGGTTGTAAACTTCTTTTATACAGGAATAAAAAGAGTTACGTGTAACTTATTGCATGTACTGTATGAATAAGCATCGGCTAACTCCGTGCCAGCAGCCGCGGTAATACGGAGGATGCGAGCGTTATCCGGATTTATTGGGTTTAAAGGGTGCGCAGGCGGGAACTTAAGTCAGCGGTGAAATCTCGACGCTTAACGTCGAAACTGCCGTTGAAACTGGGTTTCTTGAGTATAGATGAAGTAGGCGGAATTCGTTGTGTAGCGGTGACATGCTTAGATATAACGAGGAACTCCGATTGCGTAGGCAGCTTACTA…	Bacteroidetes	Bacteroidia	Bacteroidales	Porphyromonadaceae_1	Dysgonomonas
ACTCCTACGGGAGGCAGCAGTAGGGAATCTTCGGCAATGGGGGGAACCCTGACCGAGCAACGCCGCGTGAGTGAAGAAGGTTTTCGGATCGTAAAACTCTGTTGTAAGTAAAGAACGGATGAGAGAGTGGAAAGTTCTCATCGTGACGGTAACTTACCAGAAAGGGACGGCTAACTACGTGCCAGCAGCCGCGGTAATACGTAGGTCCCGAGCGTTGTCCGGATTTATTGGGCGTAAAGCGAGCGCAGGTGGTTTTTTAAGTCTGGTGTAAAAGGCTACTGCTTAACAGTAGTATGCATTGGAAACTGGAGAACTTGAGTGCAGGAGAGGAGAGTGGAATTCCATGTGTAGCGGTGAAATGCGTAGATATATGGAGGAACACCGGAGGCGAAAGCGGCT…	Firmicutes	Bacilli	Lactobacillales	Enterococcaceae	Enterococcus_3
ACTCCTACGGGAGGCAGCAGTGGGGAATTTTGCGCAATGGGCGAAAGCCTGACGCAGCAACGCCGCGTGCGGGATGAAGGCCTTCGGGTTGTAAACCGCTTTCAGCAGGGAAGATTATGACGGTACCTGCAGAAGAAGCTCCGGCTAACTACGTGCCAGCAGCCGCGGTAATACGTAGGGAGCAAGCGTTATCCGGATTCATTGGGCGTAAAGAGCGCGTAGGCGGCTTGTTAAGTCAGGTGTCAAATCCGAGGGCTCAACCCCCGGCCGCACCTGAAACTGGCAGGCTTGAGTTCGGTAGAGGAAGGTGGAATTCCCAGTGTAGCGGTGGAATGCGCAGATATTGGGAAGAACACCGGTGGCGAAGGCGGCCTTCTGGGCCGTAACTGACGCTGAGGC…	Actinobacteria	Actinobacteria	Coriobacteriales	Coriobacteriaceae	Uncultured_10
ACTCCTACGGGAGGCAGCAGTGGGGAATATTGCACAATGGGGGAAACCCTGATGCAGCGACGCCGCGTGAGTGAAGACGGTCTTCGGATTGTAAAGCTCTGTTGCGGGGGACGATAATGACGGTACCCCGTGAGGAAGCCACGGCTAACTACGTGCCAGCAGCCGCGGTAATACGTAGGTGGCAAGCGTTGTCCGGAATTACTGGGTGTAAAGGGAGCGTAGGCGGGCAATTAAGTTGGATGTGAAATCCACAGGCTTAACCTGTGGCGTGCATCCAAAACTGAATGTCTTGAGTGATGTAGAGGCAGGCGGAATTCCTAGTGTAGCGGTGAAATGCGTAGATATTAGGAGGAACACCAGTGGCGAAGGCGGCCTGCTGGGCATTAACTGACGCTGAGG…	Firmicutes	Clostridia_1	Clostridiales	Ruminococcaceae	Insect_cluster
ACTCCTACGGGAGGCAGCAGTGAGGAATATTGGTCAATGGACGCAAGTCTGAACCAGCCATGCCGCGTGCAGGAAGACGGCTCTATGAGTTGTAAACTGCTTTTGTACGAGGGTAAACCCAGATACGTGTATCTGGCTGAAAGTATCGTACGAATAAGGATCGGCTAACTCCGTGCCAGCAGCCGCGGTAATACGGAGGATCCAAGCGTTATCCGGATTTATTGGGTTTAAAGGGTGCGTAGGCGGTTTGTTAAGTTAGAGGTGAAATCCCGTGGCTCAACCACGGAACTGCCTCTGATACTGGCAGGCTAGAGAATGGTTGCTGTGGGCGGAATGTGTGGTGTAGCGGTGAAATGCTTAGAGATCACACAGAACACCGATTGCGAAGGCAGCTCACAA…	Bacteroidetes	Bacteroidia	Bacteroidales	Rikenellaceae	Alisitpes_IV
ACTCCTACGGGAGGCAGCAGTGGGGAATATTGCACAATGGGGGAAACCCTGATGCAGCGACGCCGCGTGAGTGAAGACGGTCTTCGGATTGTAAAGCTCTGTTGCGGGGGACGATAATGACGGTACCCCGTGAGGAAGCCACGGCTAACTACGTGCCAGCAGCCGCGGTAATACGTAGGTGGCAAGCGTTGTCCGGAATTACTGGGTGTAAAGGGAGCGTAGGCGGGCAATTAAGTTGGATGTGAAATCCACAGGCTTAACCTGTGGCGTGCATCCAAAACTGAATGTCTTGAGTGATGTAGAGGCAGGCGGAATTCCTAGTGTAGCGGTGAAATGCGTAGATATTAGGAGGAACACCAGTGGCGAAGGCGGCCTGCTGGGCATTAACTGACGCTGAGG…	Firmicutes	Clostridia_1	Clostridiales	Ruminococcaceae	Insect_cluster
ACTCCTACGGGAGGCAGCAGTAGGGAATCTTCGGCAATGGGGGGGACCCTGACCGAGCAACGCCGCGTGAGTGAAGAAGGTTTTCGGATCGTAAAACTCTGTTGTAAGTAAAGAACGGGTGAGAGAGTGGAAAGCTCTCACTATGACGGTAACTTACCAGAAAGGGACGGCTAACTACGTGCCAGCAGCCGCGGTAATACGTAGGTCCCGAGCGTTGTCCGGATTTATTGGGCGTAAAGCGAGCGCAGGTGGTTTTTTAAGTCTGGTGTAAAAGGCTACTGCTTAACAGTAGTATGCATTGGAAACTGGAGAACTTGAGTGCAGGAGAGGAGAGTGGAATTCCATGTGTAGCGGTGAAATGCGTAGATATATGGAGGAACACCGGAGGCGAAAGCGGCT…	Firmicutes	Bacilli	Lactobacillales	Enterococcaceae	Enterococcus_3
ACTCCTACGGGAGGCAGCAGTGGGGAATTTTGCGCAATGGGCGAAAGCCTGACGCAGCAACGCCGCGTGCGGGATGAAGGCCTTCGGGTTGTAAACCGCTTTCAGCAGGGAAGATTATGACGGTACCTGCAGAAGAAGCTCCGGCTAACTACGTGCCAGCAGCCGCGGTAATACGTAGGGAGCAAGCGTTATCCGGATTCATTGGGCGTAAAGAGCGCGTAGGCGGCTTGTTAAGTCAGGTGTCAAATCCGAGGGCTCAACCCCCGGCCGCACCTGAAACTGGCAGGCTTGAGTTCGGTAGAGGAAGGTGGAATTCCCAGTGTAGCGGTGGAATGCGCAGATATTGGGAAGAACACCGGTGGCGAAGGCGGCCTTCTGGGCCGTAACTGACGCTGAGGC…	Actinobacteria	Actinobacteria	Coriobacteriales	Coriobacteriaceae	Uncultured_10
ACTCCTACGGGAGGCAGCAGTGGGGAATTTTGCGCAATGGGCGAAAGCCTGACGCAGCAACGCCGCGTGCGGGATGAAGGCCTTCGGGTTGTAAACCGCTTTCAGCAGGGAAGATTATGACGGTACCTGCAGAAGAAGCTCCGGCTAACTACGTGCCAGCAGCCGCGGTAATACGTAGGGAGCAAGCGTTATCCGGATTCATTGGGCGTAAAGAGCGCGTAGGCGGCTTGTTAAGTCAGGTGTCAAATCCGAGGGCTCAACCCCCGGCCGCACCTGAAACTGGCAGGCTTGAGTTCGGTAGAGGAAGGTGGAATTCCCAGTGTAGCGGTGGAATGCGCAGATATTGGGAAGAACACCGGTGGCGAAGGCGGCCTTCTGGGCCGTAACTGACGCTGAGGC…	Actinobacteria	Actinobacteria	Coriobacteriales	Coriobacteriaceae	Uncultured_10
ACTCCTACGGGAGGCAGCAGTGGGGAATTTTGGACAATGGGCGAAAGCCTGATCCAGCAATGCCGCGTGTGTGAAGAAGGCCTTCGGGTTGTAAAGCACTTTTGTCCGGAAAGAAATCCTTGGCTCTAATACAGTCGGGGGATGACGGTACCGGAAGAATAAGCACCGGCTAACTACGTGCCAGCAGCCGCGGTAATACGTAGGGTGCGAGCGTTAATCGGAATTACTGGGCGTAAAGCGTGCGCAGGCGGTTTGCTAAGACCGATGTGAAATCCCCGGGCTCAACCTGGGAACTGCATTGGTGACTGGCAGGCTAGAGTATGGCAGAGGGGGGTAGAATTCCACGTGTAGCAGTGAAATGCGTAGAGATGTGGAGGAATACCGATGGCGAAGGCAGCC…	Proteobacteria	Betaproteobacteria	Rhodocyclales	Rhodocyclaceae_3	Termite_cluster
ACTCCTACGGGAGGCAGCAGTGGGGAATATTGCACAATGGGGGAAACCCTGATGCAGCGACGCCGCGTGAGTGAAGACGGTCTTCGGATTGTAAAGCTCTGTTGCGGGGGACGATAATGACGGTACCCCGTGAGGAAGCCACGGCTAACTACGTGCCAGCAGCCGCGGTAATACGTAGGTGGCAAGCGTTGTCCGGAATTACTGGGTGTAAAGGGAGCGTAGGCGGGCAATTAAGTTGGATGTGAAATCCACAGGCTTAACCTGTGGCGTGCATCCAAAACTGAATGTCTTGAGTGATGTAGAGGCAGGCGGAATTCCTAGTGTAGCGGTGAAATGCGTAGATATTAGGAGGAACACCAGTGGCGAAGGCGGCCTGCTGGGCATTAACTGACGCTGAGG…	Firmicutes	Clostridia_1	Clostridiales	Ruminococcaceae	Insect_cluster
ACTCCTACGGGAGGCAGCAGTGGGGAATATTGCACAATGGGGGAAACCCTGATGCAGCGACGCCGCGTGAGTGAAGACGGTCTTCGGATTGTAAAGCTCTGTTGCGGGGGACGATAATGACGGTACCCCGTGAGGAAGCCACGGCTAACTACGTGCCAGCAGCCGCGGTAATACGTAGGTGGCAAGCGTTGTCCGGAATTACTGGGTGTAAAGGGAGCGTAGGCGGGCAATTAAGTTGGATGTGAAATCCACAGGCTTAACCTGTGGCGTGCATCCAAAACTGAATGTCTTGAGTGATGTAGAGGCAGGCGGAATTCCTAGTGTAGCGGTGAAATGCGTAGATATTAGGAGGAACACCAGTGGCGAAGGCGGCCTGCTGGGCATTAACTGACGCTGAGG…	Firmicutes	Clostridia_1	Clostridiales	Ruminococcaceae	Insect_cluster
ACTCCTACGGGAGGCAGCAGTGAGGAATATTGGTCAATGGGCGAGAGCCTGAACCAGCCAAATCGCGTGAAGGAAGACTGCCTTATGGGTTGTAAACTTCTTTTATACAGGAATAAAAAGAGTTACGTGTAACTTATTGCATGTACTGTATGAATAAGCATCGGCTAACTCCGTGCCAGCAGCCGCGGTAATACGGAGGATGCGAGCGTTATCCGGATTTATTGGGTTTAAAGGGTGCGCAGGCGGGAACTTAAGTCAGCGGTGAAATCTCGACGCTTAACGTCGAAACTGCCGTTGAAACTGGGTTTCTTGAGTATAGATGAAGTAGGCGGAATTCGTTGTGTAGCGGTGACATGCTTAGATATAACGAGGAACTCCGATTGCGTAGGCAGCTTACTA…	Bacteroidetes	Bacteroidia	Bacteroidales	Porphyromonadaceae_1	Dysgonomonas
ACTCCTACGGGAGGCAGCAGTAGGGAATCTTCGGCAATGGGGGGGACCCTGACCGAGCAACGCCGCGTGAGTGAAGAAGGTTTTCGGATCGTAAAACTCTGTTGTAAGTAAAGAACGGGTGAGAGAGTGGAAAGCTCTCACTATGACGGTAACTTACCAGAAAGGGACGGCTAACTACGTGCCAGCAGCCGCGGTAATACGTAGGTCCCGAGCGTTGTCCGGATTTATTGGGCGTAAAGCGAGCGCAGGTGGTTTTTTAAGTCTGGTGTAAAAGGCTACTGCTTAACAGTAGTATGCATTGGAAACTGGAGAACTTGAGTGCAGGAGAGGAGAGTGGAATTCCATGTGTAGCGGTGAAATGCGTAGATATATGGAGGAACACCGGAGGCGAAAGCGGCT…	Firmicutes	Bacilli	Lactobacillales	Enterococcaceae	Enterococcus_3
ACTCCTACGGGAGGCAGCAGTAGGGAATCTTCGGCAATGGGGGGGACCCTGACCGAGCAACGCCGCGTGAGTGAAGAAGGTTTTCGGATCGTAAAACTCTGTTGTAAGTAAAGAACGGGTGAGAGAGTGGAAAGCTCTCACTATGACGGTAACTTACCAGAAAGGGACGGCTAACTACGTGCCAGCAGCCGCGGTAATACGTAGGTCCCGAGCGTTGTCCGGATTTATTGGGCGTAAAGCGAGCGCAGGTGGTTTTTTAAGTCTGGTGTAAAAGGCTACTGCTTAACAGTAGTATGCATTGGAAACTGGAGAACTTGAGTGCAGGAGAGGAGAGTGGAATTCCATGTGTAGCGGTGAAATGCGTAGATATATGGAGGAACACCGGAGGCGAAAGCGGCT…	Firmicutes	Bacilli	Lactobacillales	Enterococcaceae	Enterococcus_3
ACTCCTACGGGAGGCAGCAGTAGGGAATCTTCGGCAATGGGGGGGACCCTGACCGAGCAACGCCGCGTGAGTGAAGAAGGTTTTCGGATCGTAAAACTCTGTTGTAAGTAAAGAACGGGTGAGAGAGTGGAAAGCTCTCACTATGACGGTAACTTACCAGAAAGGGACGGCTAACTACGTGCCAGCAGCCGCGGTAATACGTAGGTCCCGAGCGTTGTCCGGATTTATTGGGCGTAAAGCGAGCGCAGGTGGTTTTTTAAGTCTGGTGTAAAAGGCTACTGCTTAACAGTAGTATGCATTGGAAACTGGAGAACTTGAGTGCAGGAGAGGAGAGTGGAATTCCATGTGTAGCGGTGAAATGCGTAGATATATGGAGGAACACCGGAGGCGAAAGCGGCT…	Firmicutes	Bacilli	Lactobacillales	Enterococcaceae	Enterococcus_3
ACTCCTACGGGAGGCAGCAGTGGGGAATATTGCACAATGGGCGAAAGCCTGATGCAGCAACGCCGCGTGAGTGATGACGGTCTTCGGATTGTAAAGCTCTTTGATTAGGGACGATAATGACGGTACCTAAAGAACAAGCCACGGCTAACTACGTGCCAGCAGCCGCGGTAATACGTAGGTGGCAAGCGTTGTCCGGATTTATTGGGCGTAAAGGGAGCGTAGGCGGACCTTTAAGTCAGATGTGAAATACCCAGGGCTCAACCCGGGTGCTGCATTTGATACTGGAGGTCTAGAGTACAGGAGAGGAGAGTGGAATTCCTAGTGTAGCGGTGAAATGCGTAGAGATTAGGAAGAACACCAGTGGCGAAGGCGACTCTCTGGACTGTAACTGACGCTGAG…	Firmicutes	Clostridia_1	Clostridiales	Clostridiaceae_1	Arthropod_cluster
ACTCCTACGGGAGGCAGCAGTAGGGAATCTTCGGCAATGGGGGGAACCCTGACCGAGCAACGCCGCGTGAGTGAAGAAGGTTTTCGGATCGTAAAACTCTGTTGTAAGTAAAGAACGGATGAGAGAGTGGAAAGTTCTCATCGTGACGGTAACTTACCAGAAAGGGACGGCTAACTACGTGCCAGCAGCCGCGGTAATACGTAGGTCCCGAGCGTTGTCCGGATTTATTGGGCGTAAAGCGAGCGCAGGTGGTTTTTTAAGTCTGGTGTAAAAGGCTACTGCTTAACAGTAGTATGCATTGGAAACTGGAGAACTTGAGTGCAGGAGAGGAGAGTGGAATTCCATGTGTAGCGGTGAAATGCGTAGATATATGGAGGAACACCGGAGGCGAAAGCGGCT…	Firmicutes	Bacilli	Lactobacillales	Enterococcaceae	Enterococcus_3
ACTCCTACGGGAGGCAGCAGTGAGGAATATTGGTCAATGGGGGCAACCCTGAACCAGCCATGCCGCGTGCAGGAAGACGGCTCTATGAGTTGTAAACTGCTTTTATACAGGGATAAATCCATGTACGTGTACGTGGTTGAAGGTACTGTATGAATAAGGATCGGCTAACTCCGTGCCAGCAGCCGCGGTAATACGGAGGATCCAAGCGTTATCCGGATTTATTGGGTTTAAAGGGTGCGTAGGCGGTTTGTTAAGTTAGAGGTGAAATCCGGTGGCTCAACCACCGAACTGCCTCTGATACTGGCAGGCTAGAGATTAGATGCGGTAGGCGGAATGTGTAGTGTAGCGGTGAAATGCTTAGAGATTACACAGAACACCGATTGCGAAGGCAGCTTACCA…	Bacteroidetes	Bacteroidia	Bacteroidales	Rikenellaceae	Alistipes_II
ACTCCTACGGGAGGCAGCAGTGGGGAATATTGCACAATGGGCGAAAGCCTGATGCAGCAACGCCGCGTGAGTGATGACGGTCTTCGGATTGTAAAGCTCTTTGATTAGGGACGATAATGACGGTACCTAAAGAACAAGCCACGGCTAACTACGTGCCAGCAGCCGCGGTAATACGTAGGTGGCAAGCGTTGTCCGGATTTATTGGGCGTAAAGGGAGCGTAGGCGGACCTTTAAGTCAGATGTGAAATACCCAGGGCTCAACCCGGGTGCTGCATTTGATACTGGAGGTCTAGAGTACAGGAGAGGAGAGTGGAATTCCTAGTGTAGCGGTGAAATGCGTAGAGATTAGGAAGAACACCAGTGGCGAAGGCGACTCTCTGGACTGTAACTGACGCTGAG…	Firmicutes	Clostridia_1	Clostridiales	Clostridiaceae_1	Arthropod_cluster
ACTCCTACGGGAGGCAGCAGTGGGGAATTTTGCGCAATGGGCGAAAGCCTGACGCAGCAACGCCGCGTGCGGGATGAAGGCCTTCGGGTTGTAAACCGCTTTCAGCAGGGAAGATTATGACGGTACCTGCAGAAGAAGCTCCGGCTAACTACGTGCCAGCAGCCGCGGTAATACGTAGGGAGCAAGCGTTATCCGGATTCATTGGGCGTAAAGAGCGCGTAGGCGGCTTGTTAAGTCAGGTGTCAAATCCGAGGGCTCAACCCCCGGCCGCACCTGAAACTGGCAGGCTTGAGTTCGGTAGAGGAAGGTGGAATTCCCAGTGTAGCGGTGGAATGCGCAGATATTGGGAAGAACACCGGTGGCGAAGGCGGCCTTCTGGGCCGTAACTGACGCTGAGGC…	Actinobacteria	Actinobacteria	Coriobacteriales	Coriobacteriaceae	Uncultured_10
ACTCCTACGGGAGGCAGCAGTAGGGAATCTTCGGCAATGGGGGGAACCCTGACCGAGCAACGCCGCGTGAGTGAAGAAGGTTTTCGGATCGTAAAACTCTGTTGTAAGTAAAGAACGGATGAGAGAGTGGAAAGTTCTCATCGTGACGGTAACTTACCAGAAAGGGACGGCTAACTACGTGCCAGCAGCCGCGGTAATACGTAGGTCCCGAGCGTTGTCCGGATTTATTGGGCGTAAAGCGAGCGCAGGTGGTTTTTTAAGTCTGGTGTAAAAGGCTACTGCTTAACAGTAGTATGCATTGGAAACTGGAGAACTTGAGTGCAGGAGAGGAGAGTGGAATTCCATGTGTAGCGGTGAAATGCGTAGATATATGGAGGAACACCGGAGGCGAAAGCGGCT…	Firmicutes	Bacilli	Lactobacillales	Enterococcaceae	Enterococcus_3
ACTCCTACGGGAGGCAGCAGTGGGGAATTTTGCGCAATGGGCGAAAGCCTGACGCAGCAACGCCGCGTGCGGGATGAAGGCCTTCGGGTTGTAAACCGCTTTCAGCAGGGAAGATTATGACGGTACCTGCAGAAGAAGCTCCGGCTAACTACGTGCCAGCAGCCGCGGTAATACGTAGGGAGCAAGCGTTATCCGGATTCATTGGGCGTAAAGAGCGCGTAGGCGGCTTGTTAAGTCAGGTGTCAAATCCGAGGGCTCAACCCCCGGCCGCACCTGAAACTGGCAGGCTTGAGTTCGGTAGAGGAAGGTGGAATTCCCAGTGTAGCGGTGGAATGCGCAGATATTGGGAAGAACACCGGTGGCGAAGGCGGCCTTCTGGGCCGTAACTGACGCTGAGGC…	Actinobacteria	Actinobacteria	Coriobacteriales	Coriobacteriaceae	Uncultured_10
ACTCCTACGGGAGGCAGCAGTGAGGAATATTGGTCAATGGACGCAAGTCTGAACCAGCCATGCCGCGTGCAGGAAGACGGCTCTATGAGTTGTAAACTGCTTTTGTACGAGGGTAAACCCAGATACGTGTATCTGGCTGAAAGTATCGTACGAATAAGGATCGGCTAACTCCGTGCCAGCAGCCGCGGTAATACGGAGGATCCAAGCGTTATCCGGATTTATTGGGTTTAAAGGGTGCGTAGGCGGTTTGTTAAGTTAGAGGTGAAATCCCGTGGCTCAACCACGGAACTGCCTCTGATACTGGCAGGCTAGAGAATGGTTGCTGTGGGCGGAATGTGTGGTGTAGCGGTGAAATGCTTAGAGATCACACAGAACACCGATTGCGAAGGCAGCTCACAA…	Bacteroidetes	Bacteroidia	Bacteroidales	Rikenellaceae	Alisitpes_IV
ACTCCTACGGGAGGCAGCAGTGGGGAATTTTGGACAATGGGCGAAAGCCTGATCCAGCAATGCCGCGTGTGTGAAGAAGGCCTTCGGGTTGTAAAGCACTTTTGTCCGGAAAGAAATCCTTGGCTCTAATACAGTCGGGGGATGACGGTACCGGAAGAATAAGCACCGGCTAACTACGTGCCAGCAGCCGCGGTAATACGTAGGGTGCGAGCGTTAATCGGAATTACTGGGCGTAAAGCGTGCGCAGGCGGTTTGCTAAGACCGATGTGAAATCCCCGGGCTCAACCTGGGAACTGCATTGGTGACTGGCAGGCTAGAGTATGGCAGAGGGGGGTAGAATTCCACGTGTAGCAGTGAAATGCGTAGAGATGTGGAGGAATACCGATGGCGAAGGCAGCC…	Proteobacteria	Betaproteobacteria	Rhodocyclales	Rhodocyclaceae_3	Termite_cluster
ACTCCTACGGGAGGCAGCAGTGGGGAATTTTGCGCAATGGGCGAAAGCCTGACGCAGCAACGCCGCGTGCGGGATGAAGGCCTTCGGGTTGTAAACCGCTTTCAGCAGGGAAGATTATGACGGTACCTGCAGAAGAAGCTCCGGCTAACTACGTGCCAGCAGCCGCGGTAATACGTAGGGAGCAAGCGTTATCCGGATTCATTGGGCGTAAAGAGCGCGTAGGCGGCTTGTTAAGTCAGGTGTCAAATCCGAGGGCTCAACCCCCGGCCGCACCTGAAACTGGCAGGCTTGAGTTCGGTAGAGGAAGGTGGAATTCCCAGTGTAGCGGTGGAATGCGCAGATATTGGGAAGAACACCGGTGGCGAAGGCGGCCTTCTGGGCCGTAACTGACGCTGAGGC…	Actinobacteria	Actinobacteria	Coriobacteriales	Coriobacteriaceae	Uncultured_10
ACTCCTACGGGAGGCAGCAGTAGGGAATCTTCGGCAATGGGGGGGACCCTGACCGAGCAACGCCGCGTGAGTGAAGAAGGTTTTCGGATCGTAAAACTCTGTTGTAAGTAAAGAACGGGTGAGAGAGTGGAAAGCTCTCACTATGACGGTAACTTACCAGAAAGGGACGGCTAACTACGTGCCAGCAGCCGCGGTAATACGTAGGTCCCGAGCGTTGTCCGGATTTATTGGGCGTAAAGCGAGCGCAGGTGGTTTTTTAAGTCTGGTGTAAAAGGCTACTGCTTAACAGTAGTATGCATTGGAAACTGGAGAACTTGAGTGCAGGAGAGGAGAGTGGAATTCCATGTGTAGCGGTGAAATGCGTAGATATATGGAGGAACACCGGAGGCGAAAGCGGCT…	Firmicutes	Bacilli	Lactobacillales	Enterococcaceae	Enterococcus_3
ACTCCTACGGGAGGCAGCAGTGGGGAATATTGCACAATGGGGGAAACCCTGATGCAGCGACGCCGCGTGAGTGAAGAAGTATTTCGGTATGTAAAGCTCTATCAGCAGGGAAGAAAATGACGGTACCTGACTAAGAAGCCCCGGCTAACTACGTGCCAGCAGCCGCGGTAATACGTAGGGGGCAAGCGTTATCCGGATTTACTGGGTGTAAAGGGAGCGTAGACGGCATGGTAAGTCTGAAGTGAAAGCCCGGGGCTCAACCCCGTGGACTGCTTTGGAAACTGTCAGGCTAGAGTGCAGGAGAGGTAAGTGGAATTCCTAGTGTAGCGGTGGAATGCGTAGATATTAGGAGGAACACCAGTGGCGAAGGCGGCTTACTGGACTGTAACTGACGTTGAG…	Firmicutes	Clostridia	Clostridiales	Lachnospiraceae	NA
ACTCCTACGGGAGGCAGCAGTGGGGAATTTTGCGCAATGGGCGAAAGCCTGACGCAGCAACGCCGCGTGCGGGATGAAGGCCTTCGGGTTGTAAACCGCTTTCAGCAGGGAAGATTATGACGGTACCTGCAGAAGAAGCTCCGGCTAACTACGTGCCAGCAGCCGCGGTAATACGTAGGGAGCAAGCGTTATCCGGATTCATTGGGCGTAAAGAGCGCGTAGGCGGCTTGTTAAGTCAGGTGTCAAATCCGAGGGCTCAACCCCCGGCCGCACCTGAAACTGGCAGGCTTGAGTTCGGTAGAGGAAGGTGGAATTCCCAGTGTAGCGGTGGAATGCGCAGATATTGGGAAGAACACCGGTGGCGAAGGCGGCCTTCTGGGCCGTAACTGACGCTGAGGC…	Actinobacteria	Actinobacteria	Coriobacteriales	Coriobacteriaceae	Uncultured_10
ACTCCTACGGGAGGCAGCAGTGGGGAATATTGCACAATGGGCGCAAGCCTGATGCAGCCATGCCGCGTGTATGAAGAAGGCCTTCGGGTTGTAAAGTACTTTCAGCGGGGAGGAAGGGAGTAAAGTTAATACCTTTGCTCATTGACGTTACCCGCAGAAGAAGCACCGGCTAACTCCGTGCCAGCAGCCGCGGTAATACGGAGGGTGCAAGCGTTAATCGGAATTACTGGGCGTAAAGCGCACGCAGGCGGTTTGTTAAGTCAGATGTGAAATCCCCGGGCTCAACCTGGGAACTGCATCTGATACTGGCAAGCTTGAGTCTCGTAGAGGGGGGTAGAATTCCAGGTGTAGCGGTGAAATGCGTAGAGATCTGGAGGAATACCGGTGGCGAAGGCGGCC…	Proteobacteria	Gammaproteobacteria_1	Enterobacteriales	Enterobacteriaceae	Escherichia_blattae_cluster
ACTCCTACGGGAGGCAGCAGTAGGGAATCTTCGGCAATGGGGGGGACCCTGACCGAGCAACGCCGCGTGAGTGAAGAAGGTTTTCGGATCGTAAAACTCTGTTGTAAGTAAAGAACGGGTGAGAGAGTGGAAAGCTCTCACTATGACGGTAACTTACCAGAAAGGGACGGCTAACTACGTGCCAGCAGCCGCGGTAATACGTAGGTCCCGAGCGTTGTCCGGATTTATTGGGCGTAAAGCGAGCGCAGGTGGTTTTTTAAGTCTGGTGTAAAAGGCTACTGCTTAACAGTAGTATGCATTGGAAACTGGAGAACTTGAGTGCAGGAGAGGAGAGTGGAATTCCATGTGTAGCGGTGAAATGCGTAGATATATGGAGGAACACCGGAGGCGAAAGCGGCT…	Firmicutes	Bacilli	Lactobacillales	Enterococcaceae	Enterococcus_3
ACTCCTACGGGAGGCAGCAGTAGGGAATCTTCGGCAATGGGCGCAAGCCTGACCGAGCAACGCCGCGTGAGTGAAGAAGGTTTTCGGATCGTAAAGCTCTGTTGATAGAGAAGAACGGGTGAGAGAGTGGAAAATTCTTGCTTTGACGGTATCTATCCAGAAAGGGACGGCTAACTACGTGCCAGCAGCCGCGGTAATACGTAGGTCCCGAGCGTTGTCCGGATTTATTGGGCGTAAAGCGAGCGCAGGTGGTTCTTTAAGTCTGATGTAAAAGGCAGTGGCTCAACCATTGTAGGCATTGGAAACTGGGGAACTTGAGTGCAGTAGAGGAGAGTGGAATTCCATGTGTAGCGGTGAAATGCGTAGATATATGGAGGAACACCGGAGGCGAAAGCGGCT…	Firmicutes	Bacilli	Lactobacillales	Streptococcaceae	Lactococcus_3
ACTCCTACGGGAGGCAGCAGTGGGGAATATTGCGCAATGGGCGAAAGCCTGACGCAGCGACGCCGCGTGAGGGATGAAGGCCTTCGGGTCGTAAACCTCTGTCAGGAGGGAAGAAGTGCGAACGTGCTAATCAGCGTTCGTTTGACGGTACCTCCAAAGGAAGCACCGGCTAACTCCGTGCCAGCAGCCGCGGTAATACGGAGGGTGCAAGCGTTAATCGGAATCACTGGGCGTAAAGCGCGCGTAGGCGGCTTGTTAAGTCAGGGGTGAAATCCCACGGCCCACCCGTGGAACTGCCCTTGATACTGTCAGGCTAGAGTGTGTGAGAGGATAGCGGAATTCCTGGTGTAGGAGTGAAATCCGTAGAGATCAGGAGGAACATCAGTGGCGAAGGCGGCT…	Proteobacteria	Deltaproteobacteria	Desulfovibrionales	Desulfovibrionaceae	Gut_cluster_3
ACTCCTACGGGAGGCAGCAGTGGGGAATATTGCACAATGGGGGAAACCCTGATGCAGCGACGCCGCGTGAGTGAAGACGGTCTTCGGATTGTAAAGCTCTGTTGCGGGGGACGATAATGACGGTACCCCGTGAGGAAGCCACGGCTAACTACGTGCCAGCAGCCGCGGTAATACGTAGGTGGCAAGCGTTGTCCGGAATTACTGGGTGTAAAGGGAGCGTAGGCGGGCAATTAAGTTGGATGTGAAATCCACAGGCTTAACCTGTGGCGTGCATCCAAAACTGAATGTCTTGAGTGATGTAGAGGCAGGCGGAATTCCTAGTGTAGCGGTGAAATGCGTAGATATTAGGAGGAACACCAGTGGCGAAGGCGGCCTGCTGGGCATTAACTGACGCTGAGG…	Firmicutes	Clostridia_1	Clostridiales	Ruminococcaceae	Insect_cluster
ACTCCTACGGGAGGCAGCAGTGGGGAATATTGCACAATGGGGGAAACCCTGATGCAGCAACGCCGCGTGGAGGATGAAGCATTTCGGTGTGTAAACTCCTTTTATTTGGGAAGATAATGACGGTACCAAATGAATAAGCACCGGCTAACTCCGTGCCAGCAGCCGCGGTAATACGGAGGGTGCAAGCGTTACTCGGAATTACTGGGCGTAAAGGGTGCGTAGGCGGGTTATCAAGTCTTGAGTGAAATCCAACAGCTTAACTGTTGAACTGCTTAAGAAACTGGTAGCCTAGAGTGAGGGAGAGGTAGATGGAATTGGTGGTGTAGGGGTAAAATCCATAGATATCACCAGGAATACTCATTGCGAAGGCGATCTACTGGAACTTAACTGACGCTGAGG…	Proteobacteria	Epsilonproteobacteria	Campylobacterales	Campylobacteraceae	Sulfurospirillum
ACTCCTACGGGAGGCAGCAGTGGGGAATTTTGCGCAATGGGCGAAAGCCTGACGCAGCAACGCCGCGTGCGGGATGAAGGCCTTCGGGTTGTAAACCGCTTTCAGCAGGGAAGATTATGACGGTACCTGCAGAAGAAGCTCCGGCTAACTACGTGCCAGCAGCCGCGGTAATACGTAGGGAGCAAGCGTTATCCGGATTCATTGGGCGTAAAGAGCGCGTAGGCGGCTTGTTAAGTCAGGTGTCAAATCCGAGGGCTCAACCCCCGGCCGCACCTGAAACTGGCAGGCTTGAGTTCGGTAGAGGAAGGTGGAATTCCCAGTGTAGCGGTGGAATGCGCAGATATTGGGAAGAACACCGGTGGCGAAGGCGGCCTTCTGGGCCGTAACTGACGCTGAGGC…	Actinobacteria	Actinobacteria	Coriobacteriales	Coriobacteriaceae	Uncultured_10
ACTCCTACGGGAGGCAGCAGTAGGGAATCTTCGGCAATGGGGGGAACCCTGACCGAGCAACGCCGCGTGAGTGAAGAAGGTTTTCGGATCGTAAAACTCTGTTGTAAGTAAAGAACGGATGAGAGAGTGGAAAGTTCTCATCGTGACGGTAACTTACCAGAAAGGGACGGCTAACTACGTGCCAGCAGCCGCGGTAATACGTAGGTCCCGAGCGTTGTCCGGATTTATTGGGCGTAAAGCGAGCGCAGGTGGTTTTTTAAGTCTGGTGTAAAAGGCTACTGCTTAACAGTAGTATGCATTGGAAACTGGAGAACTTGAGTGCAGGAGAGGAGAGTGGAATTCCATGTGTAGCGGTGAAATGCGTAGATATATGGAGGAACACCGGAGGCGAAAGCGGCT…	Firmicutes	Bacilli	Lactobacillales	Enterococcaceae	Enterococcus_3
ACTCCTACGGGAGGCAGCAGTGGGGAATATTGCACAATGGGGGAAACCCTGATGCAGCGACGCCGCGTGAGTGAAGACGGTCTTCGGATTGTAAAGCTCTGTTGCGGGGGACGATAATGACGGTACCCCGTGAGGAAGCCACGGCTAACTACGTGCCAGCAGCCGCGGTAATACGTAGGTGGCAAGCGTTGTCCGGAATTACTGGGTGTAAAGGGAGCGTAGGCGGGCAATTAAGTTGGATGTGAAATCCACAGGCTTAACCTGTGGCGTGCATCCAAAACTGAATGTCTTGAGTGATGTAGAGGCAGGCGGAATTCCTAGTGTAGCGGTGAAATGCGTAGATATTAGGAGGAACACCAGTGGCGAAGGCGGCCTGCTGGGCATTAACTGACGCTGAGG…	Firmicutes	Clostridia_1	Clostridiales	Ruminococcaceae	Insect_cluster
ACTCCTACGGGAGGCAGCAGTAGGGAATCTTCGGCAATGGGGGGGACCCTGACCGAGCAACGCCGCGTGAGTGAAGAAGGTTTTCGGATCGTAAAACTCTGTTGTAAGTAAAGAACGGGTGAGAGAGTGGAAAGCTCTCACTATGACGGTAACTTACCAGAAAGGGACGGCTAACTACGTGCCAGCAGCCGCGGTAATACGTAGGTCCCGAGCGTTGTCCGGATTTATTGGGCGTAAAGCGAGCGCAGGTGGTTTTTTAAGTCTGGTGTAAAAGGCTACTGCTTAACAGTAGTATGCATTGGAAACTGGAGAACTTGAGTGCAGGAGAGGAGAGTGGAATTCCATGTGTAGCGGTGAAATGCGTAGATATATGGAGGAACACCGGAGGCGAAAGCGGCT…	Firmicutes	Bacilli	Lactobacillales	Enterococcaceae	Enterococcus_3
ACTCCTACGGGAGGCAGCAGTGGGGAATATTGCACAATGGGGGAAACCCTGATGCAGCGACGCCGCGTGAGTGAAGAAGTATTTCGGTATGTAAAGCTCTATCAGCAGGGAAGAAAATGACGGTACCTGACTAAGAAGCCCCGGCTAACTACGTGCCAGCAGCCGCGGTAATACGTAGGGGGCAAGCGTTATCCGGATTTACTGGGTGTAAAGGGAGCGTAGACGGCATGGTAAGTCTGAAGTGAAAGCCCGGGGCTCAACCCCGTGGACTGCTTTGGAAACTGTCAGGCTAGAGTGCAGGAGAGGTAAGTGGAATTCCTAGTGTAGCGGTGGAATGCGTAGATATTAGGAGGAACACCAGTGGCGAAGGCGGCTTACTGGACTGTAACTGACGTTGAG…	Firmicutes	Clostridia_1	Clostridiales	Lachnospiraceae	Uncultured_13
ACTCCTACGGGAGGCAGCAGTGGGGAATTTTGGACAATGGGCGAAAGCCTGATCCAGCAATGCCGCGTGTGTGAAGAAGGCCTTCGGGTTGTAAAGCACTTTTGTCCGGAAAGAAATCCTTGGCTCTAATACAGTCGGGGGATGACGGTACCGGAAGAATAAGCACCGGCTAACTACGTGCCAGCAGCCGCGGTAATACGTAGGGTGCGAGCGTTAATCGGAATTACTGGGCGTAAAGCGTGCGCAGGCGGTTTGCTAAGACCGATGTGAAATCCCCGGGCTCAACCTGGGAACTGCATTGGTGACTGGCAGGCTAGAGTATGGCAGAGGGGGGTAGAATTCCACGTGTAGCAGTGAAATGCGTAGAGATGTGGAGGAATACCGATGGCGAAGGCAGCC…	Proteobacteria	Betaproteobacteria	Rhodocyclales	Rhodocyclaceae_3	Termite_cluster
ACTCCTACGGGAGGCAGCAGTGGGGAATATTGCACAATGGGCGAAAGCCTGATGCAGCAACGCCGCGTGAGTGATGACGGTCTTCGGATTGTAAAGCTCTTTGATTAGGGACGATAATGACGGTACCTAAAGAACAAGCCACGGCTAACTACGTGCCAGCAGCCGCGGTAATACGTAGGTGGCAAGCGTTGTCCGGATTTATTGGGCGTAAAGGGAGCGTAGGCGGACCTTTAAGTCAGATGTGAAATACCCAGGGCTCAACCCGGGTGCTGCATTTGATACTGGAGGTCTAGAGTACAGGAGAGGAGAGTGGAATTCCTAGTGTAGCGGTGAAATGCGTAGAGATTAGGAAGAACACCAGTGGCGAAGGCGACTCTCTGGACTGTAACTGACGCTGAG…	Firmicutes	Clostridia_1	Clostridiales	Clostridiaceae_1	Arthropod_cluster
ACTCCTACGGGAGGCAGCAGTGGGGAATTTTGGACAATGGGCGAAAGCCTGATCCAGCAATGCCGCGTGTGTGAAGAAGGCCTTCGGGTTGTAAAGCACTTTTGTCCGGAAAGAAATCCTTGGCTCTAATACAGTCGGGGGATGACGGTACCGGAAGAATAAGCACCGGCTAACTACGTGCCAGCAGCCGCGGTAATACGTAGGGTGCGAGCGTTAATCGGAATTACTGGGCGTAAAGCGTGCGCAGGCGGTTTGCTAAGACCGATGTGAAATCCCCGGGCTCAACCTGGGAACTGCATTGGTGACTGGCAGGCTAGAGTATGGCAGAGGGGGGTAGAATTCCACGTGTAGCAGTGAAATGCGTAGAGATGTGGAGGAATACCGATGGCGAAGGCAGCC…	Proteobacteria	Betaproteobacteria	Rhodocyclales	Rhodocyclaceae_3	Termite_cluster
ACTCCTACGGGAGGCAGCAGTGGGGAATATTGGGCAATGGGCGAAAGCCTGACCCAGCAACGCCGCGTGAGGGAAGAAGGTTTTCGGATCGTAAACCTCTGTCGCAAGGGACGAGTAGAAGACGGTACCTTGCAAGGAAGCTCCGGCTAACTACGTGCCAGCAGCCGCGGTAATACGTAGGGAGCGAGCGTTGTCCGGAATGACTGGGCGTAAAGGGCGCGTAGGTGGCCCTATAAGTTAGGAGTGAAAGTCCCGCTTTCAAGGTGGGAATTGCTTTTAATACTGTAGGGCTTGAGTGTGGGAGAGGATAGCGGAATTCCCGGTGTAGCGGTGAAATGCGTAGAGATCGGGAGGAACACCAGTGGCGAAGGCGGCTATCTGGACCAAGACTGACACTGA…	Firmicutes	Clostridia_1	Clostridiales	Lachnospiraceae	Gut_cluster_13
ACTCCTACGGGAGGCAGCAGTAGGGAATCTTCGGCAATGGGGGGGACCCTGACCGAGCAACGCCGCGTGAGTGAAGAAGGTTTTCGGATCGTAAAACTCTGTTGTAAGTAAAGAACGGGTGAGAGAGTGGAAAGCTCTCACTATGACGGTAACTTACCAGAAAGGGACGGCTAACTACGTGCCAGCAGCCGCGGTAATACGTAGGTCCCGAGCGTTGTCCGGATTTATTGGGCGTAAAGCGAGCGCAGGTGGTTTTTTAAGTCTGGTGTAAAAGGCTACTGCTTAACAGTAGTATGCATTGGAAACTGGAGAACTTGAGTGCAGGAGAGGAGAGTGGAATTCCATGTGTAGCGGTGAAATGCGTAGATATATGGAGGAACACCGGAGGCGAAAGCGGCT…	Firmicutes	Bacilli	Lactobacillales	Enterococcaceae	Enterococcus_3
ACTCCTACGGGAGGCAGCAGTAGGGAATCTTCGGCAATGGGGGGGACCCTGACCGAGCAACGCCGCGTGAGTGAAGAAGGTTTTCGGATCGTAAAACTCTGTTGTAAGTAAAGAACGGGTGAGAGAGTGGAAAGCTCTCACTATGACGGTAACTTACCAGAAAGGGACGGCTAACTACGTGCCAGCAGCCGCGGTAATACGTAGGTCCCGAGCGTTGTCCGGATTTATTGGGCGTAAAGCGAGCGCAGGTGGTTTTTTAAGTCTGGTGTAAAAGGCTACTGCTTAACAGTAGTATGCATTGGAAACTGGAGAACTTGAGTGCAGGAGAGGAGAGTGGAATTCCATGTGTAGCGGTGAAATGCGTAGATATATGGAGGAACACCGGAGGCGAAAGCGGCT…	Firmicutes	Bacilli	Lactobacillales	Enterococcaceae	Enterococcus_3
ACTCCTACGGGAGGCAGCAGTGGGGAATATTGCACAATGGGGGAAACCCTGATGCAGCGACGCCGCGTGAGTGAAGAAGTATTTCGGTATGTAAAGCTCTATCAGCAGGGAAGAAAATGACGGTACCTGACTAAGAAGCCCCGGCTAACTACGTGCCAGCAGCCGCGGTAATACGTAGGGGGCAAGCGTTATCCGGATTTACTGGGTGTAAAGGGAGCGTAGACGGCATGGTAAGTCTGAAGTGAAAGCCCGGGGCTCAACCCCGTGGACTGCTTTGGAAACTGTCAGGCTAGAGTGCAGGAGAGGTAAGTGGAATTCCTAGTGTAGCGGTGGAATGCGTAGATATTAGGAGGAACACCAGTGGCGAAGGCGGCTTACTGGACTGTAACTGACGTTGAG…	Firmicutes	Clostridia_1	Clostridiales	Lachnospiraceae	Uncultured_13
ACTCCTACGGGAGGCAGCAGTGAGGAATATTGGTCAATGGGCGAGAGCCTGAACCAGCCAAATCGCGTGAAGGAAGACTGCCTTATGGGTTGTAAACTTCTTTTATACAGGAATAAAAAGAGTTACGTGTAACTTATTGCATGTACTGTATGAATAAGCATCGGCTAACTCCGTGCCAGCAGCCGCGGTAATACGGAGGATGCGAGCGTTATCCGGATTTATTGGGTTTAAAGGGTGCGCAGGCGGGAACTTAAGTCAGCGGTGAAATCTCGACGCTTAACGTCGAAACTGCCGTTGAAACTGGGTTTCTTGAGTATAGATGAAGTAGGCGGAATTCGTTGTGTAGCGGTGACATGCTTAGATATAACGAGGAACTCCGATTGCGTAGGCAGCTTACTA…	Bacteroidetes	Bacteroidia	Bacteroidales	Porphyromonadaceae_1	Dysgonomonas
ACTCCTACGGGAGGCAGCAGTGGGGAATTTTGGACAATGGGCGAAAGCCTGATCCAGCAATGCCGCGTGTGTGAAGAAGGCCTTCGGGTTGTAAAGCACTTTTGTCCGGAAAGAAATCCTTGGCTCTAATACAGTCGGGGGATGACGGTACCGGAAGAATAAGCACCGGCTAACTACGTGCCAGCAGCCGCGGTAATACGTAGGGTGCGAGCGTTAATCGGAATTACTGGGCGTAAAGCGTGCGCAGGCGGTTTGCTAAGACCGATGTGAAATCCCCGGGCTCAACCTGGGAACTGCATTGGTGACTGGCAGGCTAGAGTATGGCAGAGGGGGGTAGAATTCCACGTGTAGCAGTGAAATGCGTAGAGATGTGGAGGAATACCGATGGCGAAGGCAGCC…	Proteobacteria	Betaproteobacteria	Rhodocyclales	Rhodocyclaceae_3	Termite_cluster
ACTCCTACGGGAGGCAGCAGTGAGGAATATTGGTCAATGGGGGCAACCCTGAACCAGCCATGCCGCGTGCAGGAAGACGGCTCTATGAGTTGTAAACTGCTTTTATACAGGGATAAATCCATGTACGTGTACGTGGTTGAAGGTACTGTATGAATAAGGATCGGCTAACTCCGTGCCAGCAGCCGCGGTAATACGGAGGATCCAAGCGTTATCCGGATTTATTGGGTTTAAAGGGTGCGTAGGCGGTTTGTTAAGTTAGAGGTGAAATCCGGTGGCTCAACCACCGAACTGCCTCTGATACTGGCAGGCTAGAGATTAGATGCGGTAGGCGGAATGTGTAGTGTAGCGGTGAAATGCTTAGAGATTACACAGAACACCGATTGCGAAGGCAGCTTACCA…	Bacteroidetes	Bacteroidia	Bacteroidales	Rikenellaceae	Alistipes_II
ACTCCTACGGGAGGCAGCAGTGAGGAATATTGGTCAATGGGCGAGAGCCTGAACCAGCCAAATCGCGTGAAGGAAGACTGCCTTATGGGTTGTAAACTTCTTTTATACAGGAATAAAAAGAGTTACGTGTAACTTATTGCATGTACTGTATGAATAAGCATCGGCTAACTCCGTGCCAGCAGCCGCGGTAATACGGAGGATGCGAGCGTTATCCGGATTTATTGGGTTTAAAGGGTGCGCAGGCGGGAACTTAAGTCAGCGGTGAAATCTCGACGCTTAACGTCGAAACTGCCGTTGAAACTGGGTTTCTTGAGTATAGATGAAGTAGGCGGAATTCGTTGTGTAGCGGTGACATGCTTAGATATAACGAGGAACTCCGATTGCGTAGGCAGCTTACTA…	Bacteroidetes	Bacteroidia	Bacteroidales	Porphyromonadaceae_1	Dysgonomonas
ACTCCTACGGGAGGCAGCAGTGGGGAATATTGCACAATGGGCGCAAGCCTGATGCAGCCATGCCGCGTGTATGAAGAAGGCCTTCGGGTTGTAAAGTACTTTCAGCGGGGAGGAAGGGAGTAAAGTTAATACCTTTGCTCATTGACGTTACCCGCAGAAGAAGCACCGGCTAACTCCGTGCCAGCAGCCGCGGTAATACGGAGGGTGCAAGCGTTAATCGGAATTACTGGGCGTAAAGCGCACGCAGGCGGTTTGTTAAGTCAGATGTGAAATCCCCGGGCTCAACCTGGGAACTGCATCTGATACTGGCAAGCTTGAGTCTCGTAGAGGGGGGTAGAATTCCAGGTGTAGCGGTGAAATGCGTAGAGATCTGGAGGAATACCGGTGGCGAAGGCGGCC…	Proteobacteria	Gammaproteobacteria_1	Enterobacteriales	Enterobacteriaceae	Escherichia_blattae_cluster
ACTCCTACGGGAGGCAGCAGTAGGGAATCTTCGGCAATGGGCGCAAGCCTGACCGAGCAACGCCGCGTGAGTGAAGAAGGTTTTCGGATCGTAAAGCTCTGTTGATAGAGAAGAACGGGTGAGAGAGTGGAAAATTCTTGCTTTGACGGTATCTATCCAGAAAGGGACGGCTAACTACGTGCCAGCAGCCGCGGTAATACGTAGGTCCCGAGCGTTGTCCGGATTTATTGGGCGTAAAGCGAGCGCAGGTGGTTCTTTAAGTCTGATGTAAAAGGCAGTGGCTCAACCATTGTAGGCATTGGAAACTGGGGAACTTGAGTGCAGTAGAGGAGAGTGGAATTCCATGTGTAGCGGTGAAATGCGTAGATATATGGAGGAACACCGGAGGCGAAAGCGGCT…	Firmicutes	Bacilli	Lactobacillales	Streptococcaceae	Lactococcus_3
ACTCCTACGGGAGGCAGCAGTAGGGAATCTTCGGCAATGGGCGCAAGCCTGACCGAGCAACGCCGCGTGAGTGAAGAAGGTTTTCGGATCGTAAAGCTCTGTTGATAGAGAAGAACGGGTGAGAGAGTGGAAAATTCTTGCTTTGACGGTATCTATCCAGAAAGGGACGGCTAACTACGTGCCAGCAGCCGCGGTAATACGTAGGTCCCGAGCGTTGTCCGGATTTATTGGGCGTAAAGCGAGCGCAGGTGGTTCTTTAAGTCTGATGTAAAAGGCAGTGGCTCAACCATTGTAGGCATTGGAAACTGGGGAACTTGAGTGCAGTAGAGGAGAGTGGAATTCCATGTGTAGCGGTGAAATGCGTAGATATATGGAGGAACACCGGAGGCGAAAGCGGCT…	Firmicutes	Bacilli	Lactobacillales	Streptococcaceae	Lactococcus_3
ACTCCTACGGGAGGCAGCAGTGGGGAATTTTGCGCAATGGGCGAAAGCCTGACGCAGCAACGCCGCGTGCGGGATGAAGGCCTTCGGGTTGTAAACCGCTTTCAGCAGGGAAGATTATGACGGTACCTGCAGAAGAAGCTCCGGCTAACTACGTGCCAGCAGCCGCGGTAATACGTAGGGAGCAAGCGTTATCCGGATTCATTGGGCGTAAAGAGCGCGTAGGCGGCTTGTTAAGTCAGGTGTCAAATCCGAGGGCTCAACCCCCGGCCGCACCTGAAACTGGCAGGCTTGAGTTCGGTAGAGGAAGGTGGAATTCCCAGTGTAGCGGTGGAATGCGCAGATATTGGGAAGAACACCGGTGGCGAAGGCGGCCTTCTGGGCCGTAACTGACGCTGAGGC…	Actinobacteria	Actinobacteria	Coriobacteriales	Coriobacteriaceae	Uncultured_10
ACTCCTACGGGAGGCAGCAGTGGGGAATTTTGCGCAATGGGCGAAAGCCTGACGCAGCAACGCCGCGTGCGGGATGAAGGCCTTCGGGTTGTAAACCGCTTTCAGCAGGGAAGATTATGACGGTACCTGCAGAAGAAGCTCCGGCTAACTACGTGCCAGCAGCCGCGGTAATACGTAGGGAGCAAGCGTTATCCGGATTCATTGGGCGTAAAGAGCGCGTAGGCGGCTTGTTAAGTCAGGTGTCAAATCCGAGGGCTCAACCCCCGGCCGCACCTGAAACTGGCAGGCTTGAGTTCGGTAGAGGAAGGTGGAATTCCCAGTGTAGCGGTGGAATGCGCAGATATTGGGAAGAACACCGGTGGCGAAGGCGGCCTTCTGGGCCGTAACTGACGCTGAGGC…	Actinobacteria	Actinobacteria	Coriobacteriales	Coriobacteriaceae	Uncultured_10
ACTCCTACGGGAGGCAGCAGTAGGGAATCTTCGGCAATGGGCGCAAGCCTGACCGAGCAACGCCGCGTGAGTGAAGAAGGTTTTCGGATCGTAAAGCTCTGTTGATAGAGAAGAACGGGTGAGAGAGTGGAAAATTCTTGCTTTGACGGTATCTATCCAGAAAGGGACGGCTAACTACGTGCCAGCAGCCGCGGTAATACGTAGGTCCCGAGCGTTGTCCGGATTTATTGGGCGTAAAGCGAGCGCAGGTGGTTCTTTAAGTCTGATGTAAAAGGCAGTGGCTCAACCATTGTAGGCATTGGAAACTGGGGAACTTGAGTGCAGTAGAGGAGAGTGGAATTCCATGTGTAGCGGTGAAATGCGTAGATATATGGAGGAACACCGGAGGCGAAAGCGGCT…	Firmicutes	Bacilli	Lactobacillales	Streptococcaceae	Lactococcus_3
ACTCCTACGGGAGGCAGCAGTGGGGAATATTGCACAATGGGCGCAAGCCTGATGCAGCCATGCCGCGTGTATGAAGAAGGCCTTCGGGTTGTAAAGTACTTTCAGCGGGGAGGAAGGGAGTAAAGTTAATACCTTTGCTCATTGACGTTACCCGCAGAAGAAGCACCGGCTAACTCCGTGCCAGCAGCCGCGGTAATACGGAGGGTGCAAGCGTTAATCGGAATTACTGGGCGTAAAGCGCACGCAGGCGGTTTGTTAAGTCAGATGTGAAATCCCCGGGCTCAACCTGGGAACTGCATCTGATACTGGCAAGCTTGAGTCTCGTAGAGGGGGGTAGAATTCCAGGTGTAGCGGTGAAATGCGTAGAGATCTGGAGGAATACCGGTGGCGAAGGCGGCC…	Proteobacteria	Gammaproteobacteria_1	Enterobacteriales	Enterobacteriaceae	Escherichia_blattae_cluster
ACTCCTACGGGAGGCAGCAGTGGGGAATATTGCACAATGGGGGAAACCCTGATGCAGCAACGCCGCGTGGAGGATGAAGCATTTCGGTGTGTAAACTCCTTTTATTTGGGAAGATAATGACGGTACCAAATGAATAAGCACCGGCTAACTCCGTGCCAGCAGCCGCGGTAATACGGAGGGTGCAAGCGTTACTCGGAATTACTGGGCGTAAAGGGTGCGTAGGCGGGTTATCAAGTCTTGAGTGAAATCCAACAGCTTAACTGTTGAACTGCTTAAGAAACTGGTAGCCTAGAGTGAGGGAGAGGTAGATGGAATTGGTGGTGTAGGGGTAAAATCCATAGATATCACCAGGAATACTCATTGCGAAGGCGATCTACTGGAACTTAACTGACGCTGAGG…	Proteobacteria	Epsilonproteobacteria	Campylobacterales	Campylobacteraceae	Sulfurospirillum
ACTCCTACGGGAGGCAGCAGTGGGGAATATTGCACAATGGGGGAAACCCTGATGCAGCGACGCCGCGTGAGTGAAGACGGTCTTCGGATTGTAAAGCTCTGTTGCGGGGGACGATAATGACGGTACCCCGTGAGGAAGCCACGGCTAACTACGTGCCAGCAGCCGCGGTAATACGTAGGTGGCAAGCGTTGTCCGGAATTACTGGGTGTAAAGGGAGCGTAGGCGGGCAATTAAGTTGGATGTGAAATCCACAGGCTTAACCTGTGGCGTGCATCCAAAACTGAATGTCTTGAGTGATGTAGAGGCAGGCGGAATTCCTAGTGTAGCGGTGAAATGCGTAGATATTAGGAGGAACACCAGTGGCGAAGGCGGCCTGCTGGGCATTAACTGACGCTGAGG…	Firmicutes	Clostridia_1	Clostridiales	Ruminococcaceae	Insect_cluster
ACTCCTACGGGAGGCAGCAGTGAGGAATATTGGTCAATGGACGCAAGTCTGAACCAGCCATGCCGCGTGCAGGAAGACGGCTCTATGAGTTGTAAACTGCTTTTGTACGAGGGTAAACCCAGATACGTGTATCTGGCTGAAAGTATCGTACGAATAAGGATCGGCTAACTCCGTGCCAGCAGCCGCGGTAATACGGAGGATCCAAGCGTTATCCGGATTTATTGGGTTTAAAGGGTGCGTAGGCGGTTTGTTAAGTTAGAGGTGAAATCCCGTGGCTCAACCACGGAACTGCCTCTGATACTGGCAGGCTAGAGAATGGTTGCTGTGGGCGGAATGTGTGGTGTAGCGGTGAAATGCTTAGAGATCACACAGAACACCGATTGCGAAGGCAGCTCACAA…	Bacteroidetes	Bacteroidia	Bacteroidales	Rikenellaceae	Alisitpes_IV
ACTCCTACGGGAGGCAGCAGTGGGGAATATTGGGCAATGGGCGAAAGCCTGACCCAGCAACGCCGCGTGAGGGAAGAAGGTTTTCGGATCGTAAACCTCTGTCGCAAGGGACGAGTAGAAGACGGTACCTTGCAAGGAAGCTCCGGCTAACTACGTGCCAGCAGCCGCGGTAATACGTAGGGAGCGAGCGTTGTCCGGAATGACTGGGCGTAAAGGGCGCGTAGGTGGCCCTATAAGTTAGGAGTGAAAGTCCCGCTTTCAAGGTGGGAATTGCTTTTAATACTGTAGGGCTTGAGTGTGGGAGAGGATAGCGGAATTCCCGGTGTAGCGGTGAAATGCGTAGAGATCGGGAGGAACACCAGTGGCGAAGGCGGCTATCTGGACCAAGACTGACACTGA…	Firmicutes	Clostridia_1	Clostridiales	Lachnospiraceae	Gut_cluster_13
ACTCCTACGGGAGGCAGCAGTGGGGAATTTTGGACAATGGGCGAAAGCCTGATCCAGCAATGCCGCGTGTGTGAAGAAGGCCTTCGGGTTGTAAAGCACTTTTGTCCGGAAAGAAATCCTTGGCTCTAATACAGTCGGGGGATGACGGTACCGGAAGAATAAGCACCGGCTAACTACGTGCCAGCAGCCGCGGTAATACGTAGGGTGCGAGCGTTAATCGGAATTACTGGGCGTAAAGCGTGCGCAGGCGGTTTGCTAAGACCGATGTGAAATCCCCGGGCTCAACCTGGGAACTGCATTGGTGACTGGCAGGCTAGAGTATGGCAGAGGGGGGTAGAATTCCACGTGTAGCAGTGAAATGCGTAGAGATGTGGAGGAATACCGATGGCGAAGGCAGCC…	Proteobacteria	Betaproteobacteria	Rhodocyclales	Rhodocyclaceae_3	Termite_cluster
ACTCCTACGGGAGGCAGCAGTGGGGAATTTTGGACAATGGGCGAAAGCCTGATCCAGCAATGCCGCGTGTGTGAAGAAGGCCTTCGGGTTGTAAAGCACTTTTGTCCGGAAAGAAATCCTTGGCTCTAATACAGTCGGGGGATGACGGTACCGGAAGAATAAGCACCGGCTAACTACGTGCCAGCAGCCGCGGTAATACGTAGGGTGCGAGCGTTAATCGGAATTACTGGGCGTAAAGCGTGCGCAGGCGGTTTGCTAAGACCGATGTGAAATCCCCGGGCTCAACCTGGGAACTGCATTGGTGACTGGCAGGCTAGAGTATGGCAGAGGGGGGTAGAATTCCACGTGTAGCAGTGAAATGCGTAGAGATGTGGAGGAATACCGATGGCGAAGGCAGCC…	Proteobacteria	Betaproteobacteria	Rhodocyclales	Rhodocyclaceae_3	Termite_cluster
ACTCCTACGGGAGGCAGCAGTGGGGAATTTTGCGCAATGGGCGAAAGCCTGACGCAGCAACGCCGCGTGCGGGATGAAGGCCTTCGGGTTGTAAACCGCTTTCAGCAGGGAAGATTATGACGGTACCTGCAGAAGAAGCTCCGGCTAACTACGTGCCAGCAGCCGCGGTAATACGTAGGGAGCAAGCGTTATCCGGATTCATTGGGCGTAAAGAGCGCGTAGGCGGCTTGTTAAGTCAGGTGTCAAATCCGAGGGCTCAACCCCCGGCCGCACCTGAAACTGGCAGGCTTGAGTTCGGTAGAGGAAGGTGGAATTCCCAGTGTAGCGGTGGAATGCGCAGATATTGGGAAGAACACCGGTGGCGAAGGCGGCCTTCTGGGCCGTAACTGACGCTGAGGC…	Actinobacteria	Actinobacteria	Coriobacteriales	Coriobacteriaceae	Uncultured_10
ACTCCTACGGGAGGCAGCAGTGGGGAATATTGCACAATGGGCGCAAGCCTGATGCAGCCATGCCGCGTGTATGAAGAAGGCCTTCGGGTTGTAAAGTACTTTCAGCGGGGAGGAAGGGAGTAAAGTTAATACCTTTGCTCATTGACGTTACCCGCAGAAGAAGCACCGGCTAACTCCGTGCCAGCAGCCGCGGTAATACGGAGGGTGCAAGCGTTAATCGGAATTACTGGGCGTAAAGCGCACGCAGGCGGTTTGTTAAGTCAGATGTGAAATCCCCGGGCTCAACCTGGGAACTGCATCTGATACTGGCAAGCTTGAGTCTCGTAGAGGGGGGTAGAATTCCAGGTGTAGCGGTGAAATGCGTAGAGATCTGGAGGAATACCGGTGGCGAAGGCGGCC…	Proteobacteria	Gammaproteobacteria_1	Enterobacteriales	Enterobacteriaceae	Escherichia_blattae_cluster
ACTCCTACGGGAGGCAGCAGTGAGGAATATTGGTCAATGGGCGAGAGCCTGAACCAGCCAAATCGCGTGAAGGAAGACTGCCTTATGGGTTGTAAACTTCTTTTATACAGGAATAAAAAGAGTTACGTGTAACTTATTGCATGTACTGTATGAATAAGCATCGGCTAACTCCGTGCCAGCAGCCGCGGTAATACGGAGGATGCGAGCGTTATCCGGATTTATTGGGTTTAAAGGGTGCGCAGGCGGGAACTTAAGTCAGCGGTGAAATCTCGACGCTTAACGTCGAAACTGCCGTTGAAACTGGGTTTCTTGAGTATAGATGAAGTAGGCGGAATTCGTTGTGTAGCGGTGACATGCTTAGATATAACGAGGAACTCCGATTGCGTAGGCAGCTTACTA…	Bacteroidetes	Bacteroidia	Bacteroidales	Porphyromonadaceae_1	Dysgonomonas
ACTCCTACGGGAGGCAGCAGTGGGGAATATTGCACAATGGGCGAAAGCCTGATGCAGCAACGCCGCGTGAGTGATGACGGTCTTCGGATTGTAAAGCTCTTTGATTAGGGACGATAATGACGGTACCTAAAGAACAAGCCACGGCTAACTACGTGCCAGCAGCCGCGGTAATACGTAGGTGGCAAGCGTTGTCCGGATTTATTGGGCGTAAAGGGAGCGTAGGCGGACCTTTAAGTCAGATGTGAAATACCCAGGGCTCAACCCGGGTGCTGCATTTGATACTGGAGGTCTAGAGTACAGGAGAGGAGAGTGGAATTCCTAGTGTAGCGGTGAAATGCGTAGAGATTAGGAAGAACACCAGTGGCGAAGGCGACTCTCTGGACTGTAACTGACGCTGAG…	Firmicutes	Clostridia_1	Clostridiales	Clostridiaceae_1	Arthropod_cluster
ACTCCTACGGGAGGCAGCAGTAGGGAATCTTCGGCAATGGGGGGGACCCTGACCGAGCAACGCCGCGTGAGTGAAGAAGGTTTTCGGATCGTAAAACTCTGTTGTAAGTAAAGAACGGGTGAGAGAGTGGAAAGCTCTCACTATGACGGTAACTTACCAGAAAGGGACGGCTAACTACGTGCCAGCAGCCGCGGTAATACGTAGGTCCCGAGCGTTGTCCGGATTTATTGGGCGTAAAGCGAGCGCAGGTGGTTTTTTAAGTCTGGTGTAAAAGGCTACTGCTTAACAGTAGTATGCATTGGAAACTGGAGAACTTGAGTGCAGGAGAGGAGAGTGGAATTCCATGTGTAGCGGTGAAATGCGTAGATATATGGAGGAACACCGGAGGCGAAAGCGGCT…	Firmicutes	Bacilli	Lactobacillales	Enterococcaceae	Enterococcus_3
ACTCCTACGGGAGGCAGCAGTGGGGAATATTGCGCAATGGGCGAAAGCCTGACGCAGCGACGCCGCGTGAGGGATGAAGGCCTTCGGGTCGTAAACCTCTGTCAGGAGGGAAGAAGTGCGAACGTGCTAATCAGCGTTCGTTTGACGGTACCTCCAAAGGAAGCACCGGCTAACTCCGTGCCAGCAGCCGCGGTAATACGGAGGGTGCAAGCGTTAATCGGAATCACTGGGCGTAAAGCGCGCGTAGGCGGCTTGTTAAGTCAGGGGTGAAATCCCACGGCCCACCCGTGGAACTGCCCTTGATACTGTCAGGCTAGAGTGTGTGAGAGGATAGCGGAATTCCTGGTGTAGGAGTGAAATCCGTAGAGATCAGGAGGAACATCAGTGGCGAAGGCGGCT…	Proteobacteria	Deltaproteobacteria	Desulfovibrionales	Desulfovibrionaceae	Gut_cluster_3
ACTCCTACGGGAGGCAGCAGTGAGGAATATTGGTCAATGGGGGCAACCCTGAACCAGCCATGCCGCGTGCAGGAAGACGGCTCTATGAGTTGTAAACTGCTTTTATACAGGGATAAATCCATGTACGTGTACGTGGTTGAAGGTACTGTATGAATAAGGATCGGCTAACTCCGTGCCAGCAGCCGCGGTAATACGGAGGATCCAAGCGTTATCCGGATTTATTGGGTTTAAAGGGTGCGTAGGCGGTTTGTTAAGTTAGAGGTGAAATCCGGTGGCTCAACCACCGAACTGCCTCTGATACTGGCAGGCTAGAGATTAGATGCGGTAGGCGGAATGTGTAGTGTAGCGGTGAAATGCTTAGAGATTACACAGAACACCGATTGCGAAGGCAGCTTACCA…	Bacteroidetes	Bacteroidia	Bacteroidales	Rikenellaceae	Alistipes_II
ACTCCTACGGGAGGCAGCAGTGAGGAATATTGGTCAATGGGGGCAACCCTGAACCAGCCATGCCGCGTGCAGGAAGACGGCTCTATGAGTTGTAAACTGCTTTTATACAGGGATAAATCCATGTACGTGTACGTGGTTGAAGGTACTGTATGAATAAGGATCGGCTAACTCCGTGCCAGCAGCCGCGGTAATACGGAGGATCCAAGCGTTATCCGGATTTATTGGGTTTAAAGGGTGCGTAGGCGGTTTGTTAAGTTAGAGGTGAAATCCGGTGGCTCAACCACCGAACTGCCTCTGATACTGGCAGGCTAGAGATTAGATGCGGTAGGCGGAATGTGTAGTGTAGCGGTGAAATGCTTAGAGATTACACAGAACACCGATTGCGAAGGCAGCTTACCA…	Bacteroidetes	Bacteroidia	Bacteroidales	Rikenellaceae	Alistipes_II
ACTCCTACGGGAGGCAGCAGTGGGGAATATTGCGCAATGGGCGAAAGCCTGACGCAGCGACGCCGCGTGAGGGATGAAGGCCTTCGGGTCGTAAACCTCTGTCAGGAGGGAAGAAGTGCGAACGTGCTAATCAGCGTTCGTTTGACGGTACCTCCAAAGGAAGCACCGGCTAACTCCGTGCCAGCAGCCGCGGTAATACGGAGGGTGCAAGCGTTAATCGGAATCACTGGGCGTAAAGCGCGCGTAGGCGGCTTGTTAAGTCAGGGGTGAAATCCCACGGCCCACCCGTGGAACTGCCCTTGATACTGTCAGGCTAGAGTGTGTGAGAGGATAGCGGAATTCCTGGTGTAGGAGTGAAATCCGTAGAGATCAGGAGGAACATCAGTGGCGAAGGCGGCT…	Proteobacteria	Deltaproteobacteria	Desulfovibrionales	Desulfovibrionaceae	Gut_cluster_3
ACTCCTACGGGAGGCAGCAGTGGGGAATATTGCACAATGGGGGAAACCCTGATGCAGCGACGCCGCGTGAGTGAAGAAGTATTTCGGTATGTAAAGCTCTATCAGCAGGGAAGAAAATGACGGTACCTGACTAAGAAGCCCCGGCTAACTACGTGCCAGCAGCCGCGGTAATACGTAGGGGGCAAGCGTTATCCGGATTTACTGGGTGTAAAGGGAGCGTAGACGGCATGGTAAGTCTGAAGTGAAAGCCCGGGGCTCAACCCCGTGGACTGCTTTGGAAACTGTCAGGCTAGAGTGCAGGAGAGGTAAGTGGAATTCCTAGTGTAGCGGTGGAATGCGTAGATATTAGGAGGAACACCAGTGGCGAAGGCGGCTTACTGGACTGTAACTGACGTTGAG…	Firmicutes	Clostridia_1	Clostridiales	Lachnospiraceae	Uncultured_13
ACTCCTACGGGAGGCAGCAGTGAGGAATATTGGTCAATGGACGCAAGTCTGAACCAGCCATGCCGCGTGCAGGAAGACGGCTCTATGAGTTGTAAACTGCTTTTGTACGAGGGTAAACCCAGATACGTGTATCTGGCTGAAAGTATCGTACGAATAAGGATCGGCTAACTCCGTGCCAGCAGCCGCGGTAATACGGAGGATCCAAGCGTTATCCGGATTTATTGGGTTTAAAGGGTGCGTAGGCGGTTTGTTAAGTTAGAGGTGAAATCCCGTGGCTCAACCACGGAACTGCCTCTGATACTGGCAGGCTAGAGAATGGTTGCTGTGGGCGGAATGTGTGGTGTAGCGGTGAAATGCTTAGAGATCACACAGAACACCGATTGCGAAGGCAGCTCACAA…	Bacteroidetes	Bacteroidia	Bacteroidales	Rikenellaceae	Alisitpes_IV
ACTCCTACGGGAGGCAGCAGTAGGGAATCTTCGGCAATGGGCGCAAGCCTGACCGAGCAACGCCGCGTGAGTGAAGAAGGTTTTCGGATCGTAAAGCTCTGTTGATAGAGAAGAACGGGTGAGAGAGTGGAAAATTCTTGCTTTGACGGTATCTATCCAGAAAGGGACGGCTAACTACGTGCCAGCAGCCGCGGTAATACGTAGGTCCCGAGCGTTGTCCGGATTTATTGGGCGTAAAGCGAGCGCAGGTGGTTCTTTAAGTCTGATGTAAAAGGCAGTGGCTCAACCATTGTAGGCATTGGAAACTGGGGAACTTGAGTGCAGTAGAGGAGAGTGGAATTCCATGTGTAGCGGTGAAATGCGTAGATATATGGAGGAACACCGGAGGCGAAAGCGGCT…	Firmicutes	Bacilli	Lactobacillales	Streptococcaceae	Lactococcus_3
ACTCCTACGGGAGGCAGCAGTGAGGAATATTGGTCAATGGGGGCAACCCTGAACCAGCCATGCCGCGTGCAGGAAGACGGCTCTATGAGTTGTAAACTGCTTTTATACAGGGATAAATCCATGTACGTGTACGTGGTTGAAGGTACTGTATGAATAAGGATCGGCTAACTCCGTGCCAGCAGCCGCGGTAATACGGAGGATCCAAGCGTTATCCGGATTTATTGGGTTTAAAGGGTGCGTAGGCGGTTTGTTAAGTTAGAGGTGAAATCCGGTGGCTCAACCACCGAACTGCCTCTGATACTGGCAGGCTAGAGATTAGATGCGGTAGGCGGAATGTGTAGTGTAGCGGTGAAATGCTTAGAGATTACACAGAACACCGATTGCGAAGGCAGCTTACCA…	Bacteroidetes	Bacteroidia	Bacteroidales	Rikenellaceae	Alistipes_II
ACTCCTACGGGAGGCAGCAGTGAGGAATATTGGTCAATGGACGCAAGTCTGAACCAGCCATGCCGCGTGCAGGAAGACGGCTCTATGAGTTGTAAACTGCTTTTGTGCGAGGGTAAACCCCCTTACGTGTAAGGGGCTGAAAGTATCGTACGAATAAGGATCGGCTAACTCCGTGCCAGCAGCCGCGGTAATACGGAGGATCCAAGCGTTATCCGGATTTATTGGGTTTAAAGGGTGCGTAGGCGGTTTGTTAAGTTAGAGGTGAAATCCCGTGGCTCAACCACGGAACTGCCTCTGATACTGGCAGGCTAGAGAATGGTTGCTGTGGGCGGAATGTGTGGTGTAGCGGTGAAATGCTTAGAGATCACACAGAACACCGATTGCGAAGGCAGCTCACAA…	Bacteroidetes	Bacteroidia	Bacteroidales	Rikenellaceae	Alisitpes_IV
ACTCCTACGGGAGGCAGCAGTGAGGAATATTGGTCAATGGGCGAGAGCCTGAACCAGCCAAATCGCGTGAAGGAAGACTGCCTTATGGGTTGTAAACTTCTTTTATACAGGAATAAAAAGAGTTACGTGTAACTTATTGCATGTACTGTATGAATAAGCATCGGCTAACTCCGTGCCAGCAGCCGCGGTAATACGGAGGATGCGAGCGTTATCCGGATTTATTGGGTTTAAAGGGTGCGCAGGCGGGAACTTAAGTCAGCGGTGAAATCTCGACGCTTAACGTCGAAACTGCCGTTGAAACTGGGTTTCTTGAGTATAGATGAAGTAGGCGGAATTCGTTGTGTAGCGGTGACATGCTTAGATATAACGAGGAACTCCGATTGCGTAGGCAGCTTACTA…	Bacteroidetes	Bacteroidia	Bacteroidales	Porphyromonadaceae_1	Dysgonomonas
ACTCCTACGGGAGGCAGCAGTGGGGAATATTGCACAATGGGCGCAAGCCTGATGCAGCCATGCCGCGTGTATGAAGAAGGCCTTCGGGTTGTAAAGTACTTTCAGCGGGGAGGAAGGGAGTAAAGTTAATACCTTTGCTCATTGACGTTACCCGCAGAAGAAGCACCGGCTAACTCCGTGCCAGCAGCCGCGGTAATACGGAGGGTGCAAGCGTTAATCGGAATTACTGGGCGTAAAGCGCACGCAGGCGGTTTGTTAAGTCAGATGTGAAATCCCCGGGCTCAACCTGGGAACTGCATCTGATACTGGCAAGCTTGAGTCTCGTAGAGGGGGGTAGAATTCCAGGTGTAGCGGTGAAATGCGTAGAGATCTGGAGGAATACCGGTGGCGAAGGCGGCC…	Proteobacteria	Gammaproteobacteria_1	Enterobacteriales	Enterobacteriaceae	Escherichia_blattae_cluster
ACTCCTACGGGAGGCAGCAGTGGGGAATATTGCGCAATGGGCGAAAGCCTGACGCAGCGACGCCGCGTGAGGGATGAAGGCCTTCGGGTCGTAAACCTCTGTCAGGAGGGAAGAAGTGCGAACGTGCTAATCAGCGTTCGTTTGACGGTACCTCCAAAGGAAGCACCGGCTAACTCCGTGCCAGCAGCCGCGGTAATACGGAGGGTGCAAGCGTTAATCGGAATCACTGGGCGTAAAGCGCGCGTAGGCGGCTTGTTAAGTCAGGGGTGAAATCCCACGGCCCACCCGTGGAACTGCCCTTGATACTGTCAGGCTAGAGTGTGTGAGAGGATAGCGGAATTCCTGGTGTAGGAGTGAAATCCGTAGAGATCAGGAGGAACATCAGTGGCGAAGGCGGCT…	Proteobacteria	Deltaproteobacteria	Desulfovibrionales	Desulfovibrionaceae	Gut_cluster_3
ACTCCTACGGGAGGCAGCAGTGGGGAATATTGCACAATGGGGGAAACCCTGATGCAGCAACGCCGCGTGGAGGATGAAGCATTTCGGTGTGTAAACTCCTTTTATTTGGGAAGATAATGACGGTACCAAATGAATAAGCACCGGCTAACTCCGTGCCAGCAGCCGCGGTAATACGGAGGGTGCAAGCGTTACTCGGAATTACTGGGCGTAAAGGGTGCGTAGGCGGGTTATCAAGTCTTGAGTGAAATCCAACAGCTTAACTGTTGAACTGCTTAAGAAACTGGTAGCCTAGAGTGAGGGAGAGGTAGATGGAATTGGTGGTGTAGGGGTAAAATCCATAGATATCACCAGGAATACTCATTGCGAAGGCGATCTACTGGAACTTAACTGACGCTGAGG…	Proteobacteria	Epsilonproteobacteria	Campylobacterales	Campylobacteraceae	Sulfurospirillum
ACTCCTACGGGAGGCAGCAGTGGGGAATATTGCACAATGGGGGAAACCCTGATGCAGCAACGCCGCGTGGAGGATGAAGCATTTCGGTGTGTAAACTCCTTTTATTTGGGAAGATAATGACGGTACCAAATGAATAAGCACCGGCTAACTCCGTGCCAGCAGCCGCGGTAATACGGAGGGTGCAAGCGTTACTCGGAATTACTGGGCGTAAAGGGTGCGTAGGCGGGTTATCAAGTCTTGAGTGAAATCCAACAGCTTAACTGTTGAACTGCTTAAGAAACTGGTAGCCTAGAGTGAGGGAGAGGTAGATGGAATTGGTGGTGTAGGGGTAAAATCCATAGATATCACCAGGAATACTCATTGCGAAGGCGATCTACTGGAACTTAACTGACGCTGAGG…	Proteobacteria	Epsilonproteobacteria	Campylobacterales	Campylobacteraceae	Sulfurospirillum
ACTCCTACGGGAGGCAGCAGTAGGGAATCTTCGGCAATGGGGGGGACCCTGACCGAGCAACGCCGCGTGAGTGAAGAAGGTTTTCGGATCGTAAAACTCTGTTGTAAGTAAAGAACGGGTGAGAGAGTGGAAAGCTCTCACTATGACGGTAACTTACCAGAAAGGGACGGCTAACTACGTGCCAGCAGCCGCGGTAATACGTAGGTCCCGAGCGTTGTCCGGATTTATTGGGCGTAAAGCGAGCGCAGGTGGTTTTTTAAGTCTGGTGTAAAAGGCTACTGCTTAACAGTAGTATGCATTGGAAACTGGAGAACTTGAGTGCAGGAGAGGAGAGTGGAATTCCATGTGTAGCGGTGAAATGCGTAGATATATGGAGGAACACCGGAGGCGAAAGCGGCT…	Firmicutes	Bacilli	Lactobacillales	Enterococcaceae	Enterococcus_3
ACTCCTACGGGAGGCAGCAGTGAGGAATATTGGTCAATGGACGCAAGTCTGAACCAGCCATGCCGCGTGCAGGAAGACGGCTCTATGAGTTGTAAACTGCTTTTGTACGAGGGTAAACCCAGATACGTGTATCTGGCTGAAAGTATCGTACGAATAAGGATCGGCTAACTCCGTGCCAGCAGCCGCGGTAATACGGAGGATCCAAGCGTTATCCGGATTTATTGGGTTTAAAGGGTGCGTAGGCGGTTTGTTAAGTTAGAGGTGAAATCCCGTGGCTCAACCACGGAACTGCCTCTGATACTGGCAGGCTAGAGAATGGTTGCTGTGGGCGGAATGTGTGGTGTAGCGGTGAAATGCTTAGAGATCACACAGAACACCGATTGCGAAGGCAGCTCACAA…	Bacteroidetes	Bacteroidia	Bacteroidales	Rikenellaceae	Alisitpes_IV
ACTCCTACGGGAGGCAGCAGTGGGGAATATTGCACAATGGGCGAAAGCCTGATGCAGCAACGCCGCGTGAGTGATGACGGTCTTCGGATTGTAAAGCTCTTTGATTAGGGACGATAATGACGGTACCTAAAGAACAAGCCACGGCTAACTACGTGCCAGCAGCCGCGGTAATACGTAGGTGGCAAGCGTTGTCCGGATTTATTGGGCGTAAAGGGAGCGTAGGCGGACCTTTAAGTCAGATGTGAAATACCCAGGGCTCAACCCGGGTGCTGCATTTGATACTGGAGGTCTAGAGTACAGGAGAGGAGAGTGGAATTCCTAGTGTAGCGGTGAAATGCGTAGAGATTAGGAAGAACACCAGTGGCGAAGGCGACTCTCTGGACTGTAACTGACGCTGAG…	Firmicutes	Clostridia_1	Clostridiales	Clostridiaceae_1	Arthropod_cluster
ACTCCTACGGGAGGCAGCAGTAGGGAATCTTCGGCAATGGGCGCAAGCCTGACCGAGCAACGCCGCGTGAGTGAAGAAGGTTTTCGGATCGTAAAGCTCTGTTGATAGAGAAGAACGGGTGAGAGAGTGGAAAATTCTTGCTTTGACGGTATCTATCCAGAAAGGGACGGCTAACTACGTGCCAGCAGCCGCGGTAATACGTAGGTCCCGAGCGTTGTCCGGATTTATTGGGCGTAAAGCGAGCGCAGGTGGTTCTTTAAGTCTGATGTAAAAGGCAGTGGCTCAACCATTGTAGGCATTGGAAACTGGGGAACTTGAGTGCAGTAGAGGAGAGTGGAATTCCATGTGTAGCGGTGAAATGCGTAGATATATGGAGGAACACCGGAGGCGAAAGCGGCT…	Firmicutes	Bacilli	Lactobacillales	Streptococcaceae	Lactococcus_3
ACTCCTACGGGAGGCAGCAGTGGGGAATATTGCACAATGGGCGAAAGCCTGATGCAGCAACGCCGCGTGAGTGATGACGGTCTTCGGATTGTAAAGCTCTTTGATTAGGGACGATAATGACGGTACCTAAAGAACAAGCCACGGCTAACTACGTGCCAGCAGCCGCGGTAATACGTAGGTGGCAAGCGTTGTCCGGATTTATTGGGCGTAAAGGGAGCGTAGGCGGACCTTTAAGTCAGATGTGAAATACCCAGGGCTCAACCCGGGTGCTGCATTTGATACTGGAGGTCTAGAGTACAGGAGAGGAGAGTGGAATTCCTAGTGTAGCGGTGAAATGCGTAGAGATTAGGAAGAACACCAGTGGCGAAGGCGACTCTCTGGACTGTAACTGACGCTGAG…	Firmicutes	Clostridia_1	Clostridiales	Clostridiaceae_1	Arthropod_cluster
ACTCCTACGGGAGGCAGCAGTGGGGAATATTGCACAATGGGCGCAAGCCTGATGCAGCCATGCCGCGTGTATGAAGAAGGCCTTCGGGTTGTAAAGTACTTTCAGCGGGGAGGAAGGGAGTAAAGTTAATACCTTTGCTCATTGACGTTACCCGCAGAAGAAGCACCGGCTAACTCCGTGCCAGCAGCCGCGGTAATACGGAGGGTGCAAGCGTTAATCGGAATTACTGGGCGTAAAGCGCACGCAGGCGGTTTGTTAAGTCAGATGTGAAATCCCCGGGCTCAACCTGGGAACTGCATCTGATACTGGCAAGCTTGAGTCTCGTAGAGGGGGGTAGAATTCCAGGTGTAGCGGTGAAATGCGTAGAGATCTGGAGGAATACCGGTGGCGAAGGCGGCC…	Proteobacteria	Gammaproteobacteria_1	Enterobacteriales	Enterobacteriaceae	Escherichia_blattae_cluster
ACTCCTACGGGAGGCAGCAGTGGGGAATATTGGGCAATGGGCGAAAGCCTGACCCAGCAACGCCGCGTGAGGGAAGAAGGTTTTCGGATCGTAAACCTCTGTCGCAAGGGACGAGTAGAAGACGGTACCTTGCAAGGAAGCTCCGGCTAACTACGTGCCAGCAGCCGCGGTAATACGTAGGGAGCGAGCGTTGTCCGGAATGACTGGGCGTAAAGGGCGCGTAGGTGGCCCTATAAGTTAGGAGTGAAAGTCCCGCTTTCAAGGTGGGAATTGCTTTTAATACTGTAGGGCTTGAGTGTGGGAGAGGATAGCGGAATTCCCGGTGTAGCGGTGAAATGCGTAGAGATCGGGAGGAACACCAGTGGCGAAGGCGGCTATCTGGACCAAGACTGACACTGA…	Firmicutes	Clostridia_1	Clostridiales	Lachnospiraceae	Gut_cluster_13
ACTCCTACGGGAGGCAGCAGTGAGGAATATTGGTCAATGGGCGAGAGCCTGAACCAGCCAAATCGCGTGAAGGAAGACTGCCTTATGGGTTGTAAACTTCTTTTATACAGGAATAAAAAGAGTTACGTGTAACTTATTGCATGTACTGTATGAATAAGCATCGGCTAACTCCGTGCCAGCAGCCGCGGTAATACGGAGGATGCGAGCGTTATCCGGATTTATTGGGTTTAAAGGGTGCGCAGGCGGGAACTTAAGTCAGCGGTGAAATCTCGACGCTTAACGTCGAAACTGCCGTTGAAACTGGGTTTCTTGAGTATAGATGAAGTAGGCGGAATTCGTTGTGTAGCGGTGACATGCTTAGATATAACGAGGAACTCCGATTGCGTAGGCAGCTTACTA…	Bacteroidetes	Bacteroidia	Bacteroidales	Porphyromonadaceae_1	Dysgonomonas
ACTCCTACGGGAGGCAGCAGTGAGGAATATTGGTCAATGGGCGAGAGCCTGAACCAGCCAAATCGCGTGAAGGAAGACTGCCTTATGGGTTGTAAACTTCTTTTATACAGGAATAAAAAGAGTTACGTGTAACTTATTGCATGTACTGTATGAATAAGCATCGGCTAACTCCGTGCCAGCAGCCGCGGTAATACGGAGGATGCGAGCGTTATCCGGATTTATTGGGTTTAAAGGGTGCGCAGGCGGGAACTTAAGTCAGCGGTGAAATCTCGACGCTTAACGTCGAAACTGCCGTTGAAACTGGGTTTCTTGAGTATAGATGAAGTAGGCGGAATTCGTTGTGTAGCGGTGACATGCTTAGATATAACGAGGAACTCCGATTGCGTAGGCAGCTTACTA…	Bacteroidetes	Bacteroidia	Bacteroidales	Porphyromonadaceae_1	Dysgonomonas
ACTCCTACGGGAGGCAGCAGTGGGGAATTTTGGACAATGGGCGAAAGCCTGATCCAGCAATGCCGCGTGTGTGAAGAAGGCCTTCGGGTTGTAAAGCACTTTTGTCCGGAAAGAAATCCTTGGCTCTAATACAGTCGGGGGATGACGGTACCGGAAGAATAAGCACCGGCTAACTACGTGCCAGCAGCCGCGGTAATACGTAGGGTGCGAGCGTTAATCGGAATTACTGGGCGTAAAGCGTGCGCAGGCGGTTTGCTAAGACCGATGTGAAATCCCCGGGCTCAACCTGGGAACTGCATTGGTGACTGGCAGGCTAGAGTATGGCAGAGGGGGGTAGAATTCCACGTGTAGCAGTGAAATGCGTAGAGATGTGGAGGAATACCGATGGCGAAGGCAGCC…	Proteobacteria	Betaproteobacteria	Rhodocyclales	Rhodocyclaceae_3	Termite_cluster
ACTCCTACGGGAGGCAGCAGTGGGGAATATTGCACAATGGGGGAAACCCTGATGCAGCAACGCCGCGTGGAGGATGAAGCATTTCGGTGTGTAAACTCCTTTTATTTGGGAAGATAATGACGGTACCAAATGAATAAGCACCGGCTAACTCCGTGCCAGCAGCCGCGGTAATACGGAGGGTGCAAGCGTTACTCGGAATTACTGGGCGTAAAGGGTGCGTAGGCGGGTTATCAAGTCTTGAGTGAAATCCAACAGCTTAACTGTTGAACTGCTTAAGAAACTGGTAGCCTAGAGTGAGGGAGAGGTAGATGGAATTGGTGGTGTAGGGGTAAAATCCATAGATATCACCAGGAATACTCATTGCGAAGGCGATCTACTGGAACTTAACTGACGCTGAGG…	Proteobacteria	Epsilonproteobacteria	Campylobacterales	Campylobacteraceae	Sulfurospirillum
ACTCCTACGGGAGGCAGCAGTGAGGAATATTGGTCAATGGACGAGAGTCTGAACCAGCCAAGTAGCGTGAAGGATGACTGCCCTATGGGTTGTAAACTTCTTTTATACGGGAATAAAATGCGGTACGTGTACCGTTTTGTATGTACCGTATGAATAAGGATCGGCTAACTCCGTGCCAGCAGCCGCGGTAATACGGAGGATCCGAGCGTTATCCGGATTTATTGGGTTTAAAGGGAGCGTAGGCGGAAGCTTAAGTCAGTTGTGAAAGTTTGAGGCTCAACCTTAAAATTGCAGTTGAAACTGGGTTTCTTGAGTGCGGCATAGGTGGGCGGAATTCGTGGTGTAGCGGTGAAATGCTTAGATATCACGAAGAACTCCGATTGCGAAGGCAGCTCACTG…	Bacteroidetes	Bacteroidia	Bacteroidales	Porphyromonadaceae_1	Dysgonomonas
ACTCCTACGGGAGGCAGCAGTGGGGAATATTGCACAATGGGCGAAAGCCTGATGCAGCAACGCCGCGTGAGTGATGACGGTCTTCGGATTGTAAAGCTCTTTGATTAGGGACGATAATGACGGTACCTAAAGAACAAGCCACGGCTAACTACGTGCCAGCAGCCGCGGTAATACGTAGGTGGCAAGCGTTGTCCGGATTTATTGGGCGTAAAGGGAGCGTAGGCGGACCTTTAAGTCAGATGTGAAATACCCAGGGCTCAACCCGGGTGCTGCATTTGATACTGGAGGTCTAGAGTACAGGAGAGGAGAGTGGAATTCCTAGTGTAGCGGTGAAATGCGTAGAGATTAGGAAGAACACCAGTGGCGAAGGCGACTCTCTGGACTGTAACTGACGCTGAG…	Firmicutes	Clostridia_1	Clostridiales	Clostridiaceae_1	Arthropod_cluster
ACTCCTACGGGAGGCAGCAGTGGGGAATTTTGGACAATGGGCGAAAGCCTGATCCAGCAATGCCGCGTGTGTGAAGAAGGCCTTCGGGTTGTAAAGCACTTTTGTCCGGAAAGAAATCCTTGGCTCTAATACAGTCGGGGGATGACGGTACCGGAAGAATAAGCACCGGCTAACTACGTGCCAGCAGCCGCGGTAATACGTAGGGTGCGAGCGTTAATCGGAATTACTGGGCGTAAAGCGTGCGCAGGCGGTTTGCTAAGACCGATGTGAAATCCCCGGGCTCAACCTGGGAACTGCATTGGTGACTGGCAGGCTAGAGTATGGCAGAGGGGGGTAGAATTCCACGTGTAGCAGTGAAATGCGTAGAGATGTGGAGGAATACCGATGGCGAAGGCAGCC…	Proteobacteria	Betaproteobacteria	Rhodocyclales	Rhodocyclaceae_3	Termite_cluster
ACTCCTACGGGAGGCAGCAGTGGGGAATTTTGCGCAATGGGCGAAAGCCTGACGCAGCAACGCCGCGTGCGGGATGAAGGCCTTCGGGTTGTAAACCGCTTTCAGCAGGGAAGATTATGACGGTACCTGCAGAAGAAGCTCCGGCTAACTACGTGCCAGCAGCCGCGGTAATACGTAGGGAGCAAGCGTTATCCGGATTCATTGGGCGTAAAGAGCGCGTAGGCGGCTTGTTAAGTCAGGTGTCAAATCCGAGGGCTCAACCCCCGGCCGCACCTGAAACTGGCAGGCTTGAGTTCGGTAGAGGAAGGTGGAATTCCCAGTGTAGCGGTGGAATGCGCAGATATTGGGAAGAACACCGGTGGCGAAGGCGGCCTTCTGGGCCGTAACTGACGCTGAGGC…	Actinobacteria	Actinobacteria	Coriobacteriales	Coriobacteriaceae	Uncultured_10
ACTCCTACGGGAGGCAGCAGTGGGGAATATTGCGCAATGGGCGAAAGCCTGACGCAGCGACGCCGCGTGAGGGATGAAGGCCTTCGGGTCGTAAACCTCTGTCAGGAGGGAAGAAGTGCGAACGTGCTAATCAGCGTTCGTTTGACGGTACCTCCAAAGGAAGCACCGGCTAACTCCGTGCCAGCAGCCGCGGTAATACGGAGGGTGCAAGCGTTAATCGGAATCACTGGGCGTAAAGCGCGCGTAGGCGGCTTGTTAAGTCAGGGGTGAAATCCCACGGCCCACCCGTGGAACTGCCCTTGATACTGTCAGGCTAGAGTGTGTGAGAGGATAGCGGAATTCCTGGTGTAGGAGTGAAATCCGTAGAGATCAGGAGGAACATCAGTGGCGAAGGCGGCT…	Proteobacteria	Deltaproteobacteria	Desulfovibrionales	Desulfovibrionaceae	Gut_cluster_3
ACTCCTACGGGAGGCAGCAGTGAGGAATATTGGTCAATGGGGGCAACCCTGAACCAGCCATGCCGCGTGCAGGAAGACGGCTCTATGAGTTGTAAACTGCTTTTATACAGGGATAAATCCATGTACGTGTACGTGGTTGAAGGTACTGTATGAATAAGGATCGGCTAACTCCGTGCCAGCAGCCGCGGTAATACGGAGGATCCAAGCGTTATCCGGATTTATTGGGTTTAAAGGGTGCGTAGGCGGTTTGTTAAGTTAGAGGTGAAATCCGGTGGCTCAACCACCGAACTGCCTCTGATACTGGCAGGCTAGAGATTAGATGCGGTAGGCGGAATGTGTAGTGTAGCGGTGAAATGCTTAGAGATTACACAGAACACCGATTGCGAAGGCAGCTTACCA…	Bacteroidetes	Bacteroidia	Bacteroidales	Rikenellaceae	Alistipes_II
ACTCCTACGGGAGGCAGCAGTGGGGAATATTGCACAATGGGGGAAACCCTGATGCAGCAACGCCGCGTGGAGGATGAAGCATTTCGGTGTGTAAACTCCTTTTATTTGGGAAGATAATGACGGTACCAAATGAATAAGCACCGGCTAACTCCGTGCCAGCAGCCGCGGTAATACGGAGGGTGCAAGCGTTACTCGGAATTACTGGGCGTAAAGGGTGCGTAGGCGGGTTATCAAGTCTTGAGTGAAATCCAACAGCTTAACTGTTGAACTGCTTAAGAAACTGGTAGCCTAGAGTGAGGGAGAGGTAGATGGAATTGGTGGTGTAGGGGTAAAATCCATAGATATCACCAGGAATACTCATTGCGAAGGCGATCTACTGGAACTTAACTGACGCTGAGG…	Proteobacteria	Epsilonproteobacteria	Campylobacterales	Campylobacteraceae	Sulfurospirillum
ACTCCTACGGGAGGCAGCAGTAGGGAATCTTCGGCAATGGGGGGGACCCTGACCGAGCAACGCCGCGTGAGTGAAGAAGGTTTTCGGATCGTAAAACTCTGTTGTAAGTAAAGAACGGGTGAGAGAGTGGAAAGCTCTCACTATGACGGTAACTTACCAGAAAGGGACGGCTAACTACGTGCCAGCAGCCGCGGTAATACGTAGGTCCCGAGCGTTGTCCGGATTTATTGGGCGTAAAGCGAGCGCAGGTGGTTTTTTAAGTCTGGTGTAAAAGGCTACTGCTTAACAGTAGTATGCATTGGAAACTGGAGAACTTGAGTGCAGGAGAGGAGAGTGGAATTCCATGTGTAGCGGTGAAATGCGTAGATATATGGAGGAACACCGGAGGCGAAAGCGGCT…	Firmicutes	Bacilli	Lactobacillales	Enterococcaceae	Enterococcus_3
ACTCCTACGGGAGGCAGCAGTGAGGAATATTGGTCAATGGGCGAGAGCCTGAACCAGCCAAATCGCGTGAAGGAAGACTGCCTTATGGGTTGTAAACTTCTTTTATACAGGAATAAAAAGAGTTACGTGTAACTTATTGCATGTACTGTATGAATAAGCATCGGCTAACTCCGTGCCAGCAGCCGCGGTAATACGGAGGATGCGAGCGTTATCCGGATTTATTGGGTTTAAAGGGTGCGCAGGCGGGAACTTAAGTCAGCGGTGAAATCTCGACGCTTAACGTCGAAACTGCCGTTGAAACTGGGTTTCTTGAGTATAGATGAAGTAGGCGGAATTCGTTGTGTAGCGGTGACATGCTTAGATATAACGAGGAACTCCGATTGCGTAGGCAGCTTACTA…	Bacteroidetes	Bacteroidia	Bacteroidales	Porphyromonadaceae_1	Dysgonomonas
ACTCCTACGGGAGGCAGCAGTGGGGAATATTGCACAATGGGCGAAAGCCTGATGCAGCAACGCCGCGTGAGTGATGACGGTCTTCGGATTGTAAAGCTCTTTGATTAGGGACGATAATGACGGTACCTAAAGAACAAGCCACGGCTAACTACGTGCCAGCAGCCGCGGTAATACGTAGGTGGCAAGCGTTGTCCGGATTTATTGGGCGTAAAGGGAGCGTAGGCGGACCTTTAAGTCAGATGTGAAATACCCAGGGCTCAACCCGGGTGCTGCATTTGATACTGGAGGTCTAGAGTACAGGAGAGGAGAGTGGAATTCCTAGTGTAGCGGTGAAATGCGTAGAGATTAGGAAGAACACCAGTGGCGAAGGCGACTCTCTGGACTGTAACTGACGCTGAG…	Firmicutes	Clostridia_1	Clostridiales	Clostridiaceae_1	Arthropod_cluster
ACTCCTACGGGAGGCAGCAGTGAGGAATATTGGTCAATGGACGCAAGTCTGAACCAGCCATGCCGCGTGCAGGAAGACGGCTCTATGAGTTGTAAACTGCTTTTGTGCGAGGGTAAACCCCCTTACGTGTAAGGGGCTGAAAGTATCGTACGAATAAGGATCGGCTAACTCCGTGCCAGCAGCCGCGGTAATACGGAGGATCCAAGCGTTATCCGGATTTATTGGGTTTAAAGGGTGCGTAGGCGGTTTGTTAAGTTAGAGGTGAAATCCCGTGGCTCAACCACGGAACTGCCTCTGATACTGGCAGGCTAGAGAATGGTTGCTGTGGGCGGAATGTGTGGTGTAGCGGTGAAATGCTTAGAGATCACACAGAACACCGATTGCGAAGGCAGCTCACAA…	Bacteroidetes	Bacteroidia	Bacteroidales	Rikenellaceae	Alisitpes_IV
ACTCCTACGGGAGGCAGCAGTGGGGAATATTGCACAATGGGCGAAAGCCTGATGCAGCAACGCCGCGTGAGTGATGACGGTCTTCGGATTGTAAAGCTCTTTGATTAGGGACGATAATGACGGTACCTAAAGAACAAGCCACGGCTAACTACGTGCCAGCAGCCGCGGTAATACGTAGGTGGCAAGCGTTGTCCGGATTTATTGGGCGTAAAGGGAGCGTAGGCGGACCTTTAAGTCAGATGTGAAATACCCAGGGCTCAACCCGGGTGCTGCATTTGATACTGGAGGTCTAGAGTACAGGAGAGGAGAGTGGAATTCCTAGTGTAGCGGTGAAATGCGTAGAGATTAGGAAGAACACCAGTGGCGAAGGCGACTCTCTGGACTGTAACTGACGCTGAG…	Firmicutes	Clostridia_1	Clostridiales	Clostridiaceae_1	Arthropod_cluster
ACTCCTACGGGAGGCAGCAGTGGGGAATATTGCACAATGGGGGAAACCCTGATGCAGCGACGCCGCGTGAGTGAAGAAGTATTTCGGTATGTAAAGCTCTATCAGCAGGGAAGAAAATGACGGTACCTGACTAAGAAGCCCCGGCTAACTACGTGCCAGCAGCCGCGGTAATACGTAGGGGGCAAGCGTTATCCGGATTTACTGGGTGTAAAGGGAGCGTAGACGGCATGGTAAGTCTGAAGTGAAAGCCCGGGGCTCAACCCCGTGGACTGCTTTGGAAACTGTCAGGCTAGAGTGCAGGAGAGGTAAGTGGAATTCCTAGTGTAGCGGTGGAATGCGTAGATATTAGGAGGAACACCAGTGGCGAAGGCGGCTTACTGGACTGTAACTGACGTTGAG…	Firmicutes	Clostridia_1	Clostridiales	Lachnospiraceae	Uncultured_13
ACTCCTACGGGAGGCAGCAGTGGGGAATATTGCACAATGGGGGAAACCCTGATGCAGCGACGCCGCGTGAGTGAAGAAGTATTTCGGTATGTAAAGCTCTATCAGCAGGGAAGAAAATGACGGTACCTGACTAAGAAGCCCCGGCTAACTACGTGCCAGCAGCCGCGGTAATACGTAGGGGGCAAGCGTTATCCGGATTTACTGGGTGTAAAGGGAGCGTAGACGGCATGGTAAGTCTGAAGTGAAAGCCCGGGGCTCAACCCCGTGGACTGCTTTGGAAACTGTCAGGCTAGAGTGCAGGAGAGGTAAGTGGAATTCCTAGTGTAGCGGTGGAATGCGTAGATATTAGGAGGAACACCAGTGGCGAAGGCGGCTTACTGGACTGTAACTGACGTTGAG…	Firmicutes	Clostridia_1	Clostridiales	Lachnospiraceae	Uncultured_13
ACTCCTACGGGAGGCAGCAGTGGGGAATTTTGCGCAATGGGCGAAAGCCTGACGCAGCAACGCCGCGTGCGGGATGAAGGCCTTCGGGTTGTAAACCGCTTTCAGCAGGGAAGATTATGACGGTACCTGCAGAAGAAGCTCCGGCTAACTACGTGCCAGCAGCCGCGGTAATACGTAGGGAGCAAGCGTTATCCGGATTCATTGGGCGTAAAGAGCGCGTAGGCGGCTTGTTAAGTCAGGTGTCAAATCCGAGGGCTCAACCCCCGGCCGCACCTGAAACTGGCAGGCTTGAGTTCGGTAGAGGAAGGTGGAATTCCCAGTGTAGCGGTGGAATGCGCAGATATTGGGAAGAACACCGGTGGCGAAGGCGGCCTTCTGGGCCGTAACTGACGCTGAGGC…	Actinobacteria	Actinobacteria	Coriobacteriales	Coriobacteriaceae	Uncultured_10
ACTCCTACGGGAGGCAGCAGTGGGGAATATTGCACAATGGGGGAAACCCTGATGCAGCGACGCCGCGTGAGTGAAGAAGTATTTCGGTATGTAAAGCTCTATCAGCAGGGAAGAAAATGACGGTACCTGACTAAGAAGCCCCGGCTAACTACGTGCCAGCAGCCGCGGTAATACGTAGGGGGCAAGCGTTATCCGGATTTACTGGGTGTAAAGGGAGCGTAGACGGCATGGTAAGTCTGAAGTGAAAGCCCGGGGCTCAACCCCGTGGACTGCTTTGGAAACTGTCAGGCTAGAGTGCAGGAGAGGTAAGTGGAATTCCTAGTGTAGCGGTGGAATGCGTAGATATTAGGAGGAACACCAGTGGCGAAGGCGGCTTACTGGACTGTAACTGACGTTGAG…	Firmicutes	Clostridia_1	Clostridiales	Lachnospiraceae	Uncultured_13
ACTCCTACGGGAGGCAGCAGTGGGGAATATTGCACAATGGACGGAAGTCTGATGCAGCAACGCCGCGTGGAGGATGACACATTTCGGTGCGTAAACTCCTTTTATGTAAGAAGATAATGACGGTATTATATGAATAAGCACCGGCTAACTCCGTGCCAGCAGCCGCGGTAATACGGGGGGTGCAAGCGTTACTCGGAATCACTGGGCGTAAAGAGCGTGTAGGCGGATTGATAAGTTTGAAGTGAAATCCTATAGCTTAACTATAGAACTGCTTTGAAAACTGTTAGTCTAGAATGTGGGAGAGGTAGATGGAATTTCTGGTGTAGGGGTAAAATCCGTAGAGATCAGAAGGAATACCGATTGCGAAGGCGATCTACTGGAACAATATTGACGCTGAGA…	Proteobacteria	Epsilonproteobacteria	Campylobacterales	Campylobacteraceae	Arcobacter
ACTCCTACGGGAGGCAGCAGTGGGGAATATTGCGCAATGGGCGAAAGCCTGACGCAGCGACGCCGCGTGAGGGATGAAGGCCTTCGGGTCGTAAACCTCTGTCAGGAGGGAAGAAGTGCGAACGTGCTAATCAGCGTTCGTTTGACGGTACCTCCAAAGGAAGCACCGGCTAACTCCGTGCCAGCAGCCGCGGTAATACGGAGGGTGCAAGCGTTAATCGGAATCACTGGGCGTAAAGCGCGCGTAGGCGGCTTGTTAAGTCAGGGGTGAAATCCCACGGCCCACCCGTGGAACTGCCCTTGATACTGTCAGGCTAGAGTGTGTGAGAGGATAGCGGAATTCCTGGTGTAGGAGTGAAATCCGTAGAGATCAGGAGGAACATCAGTGGCGAAGGCGGCT…	Proteobacteria	Deltaproteobacteria	Desulfovibrionales	Desulfovibrionaceae	Gut_cluster_3
ACTCCTACGGGAGGCAGCAGTGGGGAATTTTGGACAATGGGGGCAACCCTGATCCAGCCATGCCGCGTGAGTGAAGAAGGCCTTCGGGTTGTAAAGCTCTTTTGTACGGGAAGAAAAGGTTATTGCTAATATCGATGATACTTGACGGTACCGTAAGAATAAGCACCGGCTAACTACGTGCCAGCAGCCGCGGTAATACGTAGGGTGCAAGCGTTAATCGGAATTACTGGGCGTAAAGCGTGCGCAGGCGGCTTGTTGTGTCTGCTGTGAAATCCCCGGGCTTAACCTGGGAACTGCGGTGGAAACTGGCAAGCTTGAGTGTGGCAGAGGGGGGTGGAATTCCACGTGTAGCAGTGAAATGCGTAGAGATGTGGAGGAACACCGATGGCGAAGGCAGCC…	Proteobacteria	Betaproteobacteria	Rhodocyclales	Rhodocyclaceae_3	Termite_cluster
ACTCCTACGGGAGGCAGCAGTGAGGAATATTGGTCAATGGACGCAAGTCTGAACCAGCCATGCCGCGTGCAGGAAGACGGCTCTATGAGTTGTAAACTGCTTTTGTACGAGGGTAAACCCAGATACGTGTATCTGGCTGAAAGTATCGTACGAATAAGGATCGGCTAACTCCGTGCCAGCAGCCGCGGTAATACGGAGGATCCAAGCGTTATCCGGATTTATTGGGTTTAAAGGGTGCGTAGGCGGTTTGTTAAGTTAGAGGTGAAATCCCGTGGCTCAACCACGGAACTGCCTCTGATACTGGCAGGCTAGAGAATGGTTGCTGTGGGCGGAATGTGTGGTGTAGCGGTGAAATGCTTAGAGATCACACAGAACACCGATTGCGAAGGCAGCTCACAA…	Bacteroidetes	Bacteroidia	Bacteroidales	Rikenellaceae	Alisitpes_IV
ACTCCTACGGGAGGCAGCAGTGGGGAATATTGCGCAATGGGCGAAAGCCTGACGCAGCGACGCCGCGTGAGGGATGAAGGCCTTCGGGTCGTAAACCTCTGTCAGGAGGGAAGAAGTGCGAACGTGCTAATCAGCGTTCGTTTGACGGTACCTCCAAAGGAAGCACCGGCTAACTCCGTGCCAGCAGCCGCGGTAATACGGAGGGTGCAAGCGTTAATCGGAATCACTGGGCGTAAAGCGCGCGTAGGCGGCTTGTTAAGTCAGGGGTGAAATCCCACGGCCCACCCGTGGAACTGCCCTTGATACTGTCAGGCTAGAGTGTGTGAGAGGATAGCGGAATTCCTGGTGTAGGAGTGAAATCCGTAGAGATCAGGAGGAACATCAGTGGCGAAGGCGGCT…	Proteobacteria	Deltaproteobacteria	Desulfovibrionales	Desulfovibrionaceae	Gut_cluster_3
ACTCCTACGGGAGGCAGCAGTGGGGAATATTGCACAATGGGGGAAACCCTGATGCAGCAACGCCGCGTGGAGGATGAAGCATTTCGGTGTGTAAACTCCTTTTATTTGGGAAGATAATGACGGTACCAAATGAATAAGCACCGGCTAACTCCGTGCCAGCAGCCGCGGTAATACGGAGGGTGCAAGCGTTACTCGGAATTACTGGGCGTAAAGGGTGCGTAGGCGGGTTATCAAGTCTTGAGTGAAATCCAACAGCTTAACTGTTGAACTGCTTAAGAAACTGGTAGCCTAGAGTGAGGGAGAGGTAGATGGAATTGGTGGTGTAGGGGTAAAATCCATAGATATCACCAGGAATACTCATTGCGAAGGCGATCTACTGGAACTTAACTGACGCTGAGG…	Proteobacteria	Epsilonproteobacteria	Campylobacterales	Campylobacteraceae	Sulfurospirillum
ACTCCTACGGGAGGCAGCAGTGGGGAATATTGGGCAATGGGCGAAAGCCTGACCCAGCAACGCCGCGTGAGGGAAGAAGGTTTTCGGATCGTAAACCTCTGTCGCAAGGGACGAGTAGAAGACGGTACCTTGCAAGGAAGCTCCGGCTAACTACGTGCCAGCAGCCGCGGTAATACGTAGGGAGCGAGCGTTGTCCGGAATGACTGGGCGTAAAGGGCGCGTAGGTGGCCCTATAAGTTAGGAGTGAAAGTCCCGCTTTCAAGGTGGGAATTGCTTTTAATACTGTAGGGCTTGAGTGTGGGAGAGGATAGCGGAATTCCCGGTGTAGCGGTGAAATGCGTAGAGATCGGGAGGAACACCAGTGGCGAAGGCGGCTATCTGGACCAAGACTGACACTGA…	Firmicutes	Clostridia_1	Clostridiales	Lachnospiraceae	Gut_cluster_13
ACTCCTACGGGAGGCAGCAGTGGGGAATATTGCACAATGGGGGAAACCCTGATGCAGCAACGCCGCGTGGAGGATGAAGCATTTCGGTGTGTAAACTCCTTTTATTTGGGAAGATAATGACGGTACCAAATGAATAAGCACCGGCTAACTCCGTGCCAGCAGCCGCGGTAATACGGAGGGTGCAAGCGTTACTCGGAATTACTGGGCGTAAAGGGTGCGTAGGCGGGTTATCAAGTCTTGAGTGAAATCCAACAGCTTAACTGTTGAACTGCTTAAGAAACTGGTAGCCTAGAGTGAGGGAGAGGTAGATGGAATTGGTGGTGTAGGGGTAAAATCCATAGATATCACCAGGAATACTCATTGCGAAGGCGATCTACTGGAACTTAACTGACGCTGAGG…	Proteobacteria	Epsilonproteobacteria	Campylobacterales	Campylobacteraceae	Sulfurospirillum
ACTCCTACGGGAGGCAGCAGTGGGGAATATTGCACAATGGGCGCAAGCCTGATGCAGCCATGCCGCGTGTATGAAGAAGGCCTTCGGGTTGTAAAGTACTTTCAGCGGGGAGGAAGGGAGTAAAGTTAATACCTTTGCTCATTGACGTTACCCGCAGAAGAAGCACCGGCTAACTCCGTGCCAGCAGCCGCGGTAATACGGAGGGTGCAAGCGTTAATCGGAATTACTGGGCGTAAAGCGCACGCAGGCGGTTTGTTAAGTCAGATGTGAAATCCCCGGGCTCAACCTGGGAACTGCATCTGATACTGGCAAGCTTGAGTCTCGTAGAGGGGGGTAGAATTCCAGGTGTAGCGGTGAAATGCGTAGAGATCTGGAGGAATACCGGTGGCGAAGGCGGCC…	Proteobacteria	Gammaproteobacteria_1	Enterobacteriales	Enterobacteriaceae	Escherichia_blattae_cluster
ACTCCTACGGGAGGCAGCAGTGAGGAATATTGGTCAATGGGGGCAACCCTGAACCAGCCATGCCGCGTGCAGGAAGACGGCTCTATGAGTTGTAAACTGCTTTTATACAGGGATAAATCATGATACGTGTATCATGTTGCAGGTACTGTATGAATAAGGATCGGCTAACTCCGTGCCAGCAGCCGCGGTAATACGGAGGATCCAAGCGTTATCCGGATTTATTGGGTTTAAAGGGTGCGTAGGCGGCACGGTAAGTTAGCGGTGAAATCGCGGGGCTCAACCCCGCAACTGCCGTTAAAACTGCCGAGCTAGAGAGTAGATGCGGTAGGCGGAATGTGTAGTGTAGCGGTGAAATGCTTAGAGATTACACAGAACACCGATTGCGAAGGCAGCTTACCA…	Bacteroidetes	Bacteroidia	Bacteroidales	Rikenellaceae	Alistipes_II
ACTCCTACGGGAGGCAGCAGTGAGGAATATTGGTCAATGGACGCAAGTCTGAACCAGCCATGCCGCGTGCAGGAAGACGGCTCTATGAGTTGTAAACTGCTTTTGTACGAGGGTAAACCCAGATACGTGTATCTGGCTGAAAGTATCGTACGAATAAGGATCGGCTAACTCCGTGCCAGCAGCCGCGGTAATACGGAGGATCCAAGCGTTATCCGGATTTATTGGGTTTAAAGGGTGCGTAGGCGGTTTGTTAAGTTAGAGGTGAAATCCCGTGGCTCAACCACGGAACTGCCTCTGATACTGGCAGGCTAGAGAATGGTTGCTGTGGGCGGAATGTGTGGTGTAGCGGTGAAATGCTTAGAGATCACACAGAACACCGATTGCGAAGGCAGCTCACAA…	Bacteroidetes	Bacteroidia	Bacteroidales	Rikenellaceae	Alisitpes_IV
ACTCCTACGGGAGGCAGCAGTGAGGAATATTGGTCAATGGTCGGAAGACTGAACCAGCCAAGTCGCGTGAAGGAAGAAGGATCTATGGTTCGTAAACTTCTTTTATGGGGGAATAAGTATGGGGACGTGTCCCTGTTTATTGCATGTACCCCATGAATAAGCATCGGCTAACTCCGTGCCAGCAGCCGCGGTAATACGGAGGATGCGAGCGTTATCCGGATTTATTGGGTTTAAAGGGTGCGTAGGTGGATGTTTAAGTCCGCGGTGAAAGGTTGTCGCTTAACGATAAAATTGCCGTTGAAACTGGATATCTTGAGTATGTTTGAAGTAGGCGGAATGCGTGGTGTAGCGGTGAAATGCATAGATATCACGCAGAACTCCGATAGCGAAGGCAGCTTA…	Bacteroidetes	Bacteroidia	Bacteroidales	Porphyromonadaceae_3	Tannerella
ACTCCTACGGGAGGCAGCAGTGGGGAATATTGCACAATGGGCGCAAGCCTGATGCAGCCATGCCGCGTGTATGAAGAAGGCCTTCGGGTTGTAAAGTACTTTCAGCGGGGAGGAAGGGAGTAAAGTTAATACCTTTGCTCATTGACGTTACCCGCAGAAGAAGCACCGGCTAACTCCGTGCCAGCAGCCGCGGTAATACGGAGGGTGCAAGCGTTAATCGGAATTACTGGGCGTAAAGCGCACGCAGGCGGTTTGTTAAGTCAGATGTGAAATCCCCGGGCTCAACCTGGGAACTGCATCTGATACTGGCAAGCTTGAGTCTCGTAGAGGGGGGTAGAATTCCAGGTGTAGCGGTGAAATGCGTAGAGATCTGGAGGAATACCGGTGGCGAAGGCGGCC…	Proteobacteria	Gammaproteobacteria_1	Enterobacteriales	Enterobacteriaceae	Escherichia_blattae_cluster
ACTCCTACGGGAGGCAGCAGTGGGGAATATTGCACAATGGGGGAAACCCTGATGCAGCGACGCCGCGTGAGTGAAGAAGTATTTCGGTATGTAAAGCTCTATCAGCAGGGAAGAAAATGACGGTACCTGACTAAGAAGCCCCGGCTAACTACGTGCCAGCAGCCGCGGTAATACGTAGGGGGCAAGCGTTATCCGGATTTACTGGGTGTAAAGGGAGCGTAGACGGCATGGTAAGTCTGAAGTGAAAGCCCGGGGCTCAACCCCGTGGACTGCTTTGGAAACTGTCAGGCTAGAGTGCAGGAGAGGTAAGTGGAATTCCTAGTGTAGCGGTGGAATGCGTAGATATTAGGAGGAACACCAGTGGCGAAGGCGGCTTACTGGACTGTAACTGACGTTGAG…	Firmicutes	Clostridia	Clostridiales	Lachnospiraceae	NA
ACTCCTACGGGAGGCAGCAGTGGGGAATATTGCACAATGGGGGAAACCCTGATGCAGCGACGCCGCGTGAGTGAAGAAGTATTTCGGTATGTAAAGCTCTATCAGCAGGGAAGAAAATGACGGTACCTGACTAAGAAGCCCCGGCTAACTACGTGCCAGCAGCCGCGGTAATACGTAGGGGGCAAGCGTTATCCGGATTTACTGGGTGTAAAGGGAGCGTAGACGGCATGGTAAGTCTGAAGTGAAAGCCCGGGGCTCAACCCCGTGGACTGCTTTGGAAACTGTCAGGCTAGAGTGCAGGAGAGGTAAGTGGAATTCCTAGTGTAGCGGTGGAATGCGTAGATATTAGGAGGAACACCAGTGGCGAAGGCGGCTTACTGGACTGTAACTGACGTTGAG…	Firmicutes	Clostridia	Clostridiales	Lachnospiraceae	NA
ACTCCTACGGGAGGCAGCAGTGGGGAATATTGCACAATGGGGGAAACCCTGATGCAGCGACGCCGCGTGAGTGAAGACGGTCTTCGGATTGTAAAGCTCTGTTGCGGGGGACGATAATGACGGTACCCCGTGAGGAAGCCACGGCTAACTACGTGCCAGCAGCCGCGGTAATACGTAGGTGGCAAGCGTTGTCCGGAATTACTGGGTGTAAAGGGAGCGTAGGCGGGCAATTAAGTTGGATGTGAAATCCACAGGCTTAACCTGTGGCGTGCATCCAAAACTGAATGTCTTGAGTGATGTAGAGGCAGGCGGAATTCCTAGTGTAGCGGTGAAATGCGTAGATATTAGGAGGAACACCAGTGGCGAAGGCGGCCTGCTGGGCATTAACTGACGCTGAGG…	Firmicutes	Clostridia_1	Clostridiales	Ruminococcaceae	Insect_cluster
ACTCCTACGGGAGGCAGCAGTGAGGAATATTGGTCAATGGACGCAAGTCTGAACCAGCCATGCCGCGTGCAGGAAGACGGCTCTATGAGTTGTAAACTGCTTTTGTACGAGGGTAAACCCAGATACGTGTATCTGGCTGAAAGTATCGTACGAATAAGGATCGGCTAACTCCGTGCCAGCAGCCGCGGTAATACGGAGGATCCAAGCGTTATCCGGATTTATTGGGTTTAAAGGGTGCGTAGGCGGTTTGTTAAGTTAGAGGTGAAATCCCGTGGCTCAACCACGGAACTGCCTCTGATACTGGCAGGCTAGAGAATGGTTGCTGTGGGCGGAATGTGTGGTGTAGCGGTGAAATGCTTAGAGATCACACAGAACACCGATTGCGAAGGCAGCTCACAA…	Bacteroidetes	Bacteroidia	Bacteroidales	Rikenellaceae	Alisitpes_IV
ACTCCTACGGGAGGCAGCAGTGAGGAATATTGGTCAATGGGGGCAACCCTGAACCAGCCATGCCGCGTGCAGGAAGACGGCTCTATGAGTTGTAAACTGCTTTTATACAGGGATAAATCCATGTACGTGTACGTGGTTGAAGGTACTGTATGAATAAGGATCGGCTAACTCCGTGCCAGCAGCCGCGGTAATACGGAGGATCCAAGCGTTATCCGGATTTATTGGGTTTAAAGGGTGCGTAGGCGGTTTGTTAAGTTAGAGGTGAAATCCGGTGGCTCAACCACCGAACTGCCTCTGATACTGGCAGGCTAGAGATTAGATGCGGTAGGCGGAATGTGTAGTGTAGCGGTGAAATGCTTAGAGATTACACAGAACACCGATTGCGAAGGCAGCTTACCA…	Bacteroidetes	Bacteroidia	Bacteroidales	Rikenellaceae	Alistipes_II
ACTCCTACGGGAGGCAGCAGTGAGGAATATTGGTCAATGGGGGCAACCCTGAACCAGCCATGCCGCGTGCAGGAAGACGGCTCTATGAGTTGTAAACTGCTTTTATACAGGGATAAATCCATGTACGTGTACGTGGTTGAAGGTACTGTATGAATAAGGATCGGCTAACTCCGTGCCAGCAGCCGCGGTAATACGGAGGATCCAAGCGTTATCCGGATTTATTGGGTTTAAAGGGTGCGTAGGCGGTTTGTTAAGTTAGAGGTGAAATCCGGTGGCTCAACCACCGAACTGCCTCTGATACTGGCAGGCTAGAGATTAGATGCGGTAGGCGGAATGTGTAGTGTAGCGGTGAAATGCTTAGAGATTACACAGAACACCGATTGCGAAGGCAGCTTACCA…	Bacteroidetes	Bacteroidia	Bacteroidales	Rikenellaceae	Alistipes_II
ACTCCTACGGGAGGCAGCAGTGAGGAATATTGGTCAATGGACGAGAGTCTGAACCAGCCAAGTAGCGTGAAGGATGACTGCCCTATGGGTTGTAAACTTCTTTTATACGGGAATAAAATGCGGTACGTGTACCGTTTTGTATGTACCGTATGAATAAGGATCGGCTAACTCCGTGCCAGCAGCCGCGGTAATACGGAGGATCCGAGCGTTATCCGGATTTATTGGGTTTAAAGGGAGCGTAGGCGGAAGCTTAAGTCAGTTGTGAAAGTTTGAGGCTCAACCTTAAAATTGCAGTTGAAACTGGGTTTCTTGAGTGCGGCATAGGTGGGCGGAATTCGTGGTGTAGCGGTGAAATGCTTAGATATCACGAAGAACTCCGATTGCGAAGGCAGCTCACTG…	Bacteroidetes	Bacteroidia	Bacteroidales	Porphyromonadaceae_1	Dysgonomonas
ACTCCTACGGGAGGCAGCAGTGGGGAATATTGGGCAATGGGCGAAAGCCTGACCCAGCAACGCCGCGTGAGGGAAGAAGGTTTTCGGATCGTAAACCTCTGTCGCAAGGGACGAGTAGAAGACGGTACCTTGCAAGGAAGCTCCGGCTAACTACGTGCCAGCAGCCGCGGTAATACGTAGGGAGCGAGCGTTGTCCGGAATGACTGGGCGTAAAGGGCGCGTAGGTGGCCCTATAAGTTAGGAGTGAAAGTCCCGCTTTCAAGGTGGGAATTGCTTTTAATACTGTAGGGCTTGAGTGTGGGAGAGGATAGCGGAATTCCCGGTGTAGCGGTGAAATGCGTAGAGATCGGGAGGAACACCAGTGGCGAAGGCGGCTATCTGGACCAAGACTGACACTGA…	Firmicutes	Clostridia_1	Clostridiales	Lachnospiraceae	Gut_cluster_13
ACTCCTACGGGAGGCAGCAGTGGGGAATATTGCACAATGGGGGAAACCCTGATGCAGCGACGCCGCGTGAGTGAAGACGGTCTTCGGATTGTAAAGCTCTGTTGCGGGGGACGATAATGACGGTACCCCGTGAGGAAGCCACGGCTAACTACGTGCCAGCAGCCGCGGTAATACGTAGGTGGCAAGCGTTGTCCGGAATTACTGGGTGTAAAGGGAGCGTAGGCGGGCAATTAAGTTGGATGTGAAATCCACAGGCTTAACCTGTGGCGTGCATCCAAAACTGAATGTCTTGAGTGATGTAGAGGCAGGCGGAATTCCTAGTGTAGCGGTGAAATGCGTAGATATTAGGAGGAACACCAGTGGCGAAGGCGGCCTGCTGGGCATTAACTGACGCTGAGG…	Firmicutes	Clostridia_1	Clostridiales	Ruminococcaceae	Insect_cluster
ACTCCTACGGGAGGCAGCAGTGAGGAATATTGGTCAATGGACGAGAGTCTGAACCAGCCAAGTAGCGTGAAGGATGACTGCCCTATGGGTTGTAAACTTCTTTTATACGGGAATAAAATGCGGTACGTGTACCGTTTTGTATGTACCGTATGAATAAGGATCGGCTAACTCCGTGCCAGCAGCCGCGGTAATACGGAGGATCCGAGCGTTATCCGGATTTATTGGGTTTAAAGGGAGCGTAGGCGGAAGCTTAAGTCAGTTGTGAAAGTTTGAGGCTCAACCTTAAAATTGCAGTTGAAACTGGGTTTCTTGAGTGCGGCATAGGTGGGCGGAATTCGTGGTGTAGCGGTGAAATGCTTAGATATCACGAAGAACTCCGATTGCGAAGGCAGCTCACTG…	Bacteroidetes	Bacteroidia	Bacteroidales	Porphyromonadaceae_1	Dysgonomonas
ACTCCTACGGGAGGCAGCAGTGAGGAATATTGGTCAATGGACGCAAGTCTGAACCAGCCATGCCGCGTGCAGGAAGACGGCTCTATGAGTTGTAAACTGCTTTTGTACGAGGGTAAACCCAGATACGTGTATCTGGCTGAAAGTATCGTACGAATAAGGATCGGCTAACTCCGTGCCAGCAGCCGCGGTAATACGGAGGATCCAAGCGTTATCCGGATTTATTGGGTTTAAAGGGTGCGTAGGCGGTTTGTTAAGTTAGAGGTGAAATCCCGTGGCTCAACCACGGAACTGCCTCTGATACTGGCAGGCTAGAGAATGGTTGCTGTGGGCGGAATGTGTGGTGTAGCGGTGAAATGCTTAGAGATCACACAGAACACCGATTGCGAAGGCAGCTCACAA…	Bacteroidetes	Bacteroidia	Bacteroidales	Rikenellaceae	Alisitpes_IV
ACTCCTACGGGAGGCAGCAGTGGGGAATATTGCGCAATGGGCGAAAGCCTGACGCAGCGACGCCGCGTGAGGGATGAAGGCCTTCGGGTCGTAAACCTCTGTCAGGAGGGAAGAAGTGCGAACGTGCTAATCAGCGTTCGTTTGACGGTACCTCCAAAGGAAGCACCGGCTAACTCCGTGCCAGCAGCCGCGGTAATACGGAGGGTGCAAGCGTTAATCGGAATCACTGGGCGTAAAGCGCGCGTAGGCGGCTTGTTAAGTCAGGGGTGAAATCCCACGGCCCACCCGTGGAACTGCCCTTGATACTGTCAGGCTAGAGTGTGTGAGAGGATAGCGGAATTCCTGGTGTAGGAGTGAAATCCGTAGAGATCAGGAGGAACATCAGTGGCGAAGGCGGCT…	Proteobacteria	Deltaproteobacteria	Desulfovibrionales	Desulfovibrionaceae	Gut_cluster_3
ACTCCTACGGGAGGCAGCAGTGAGGAATATTGGTCAATGGGCGAGAGCCTGAACCAGCCAAATCGCGTGAAGGAAGACTGCCTTATGGGTTGTAAACTTCTTTTATACAGGAATAAAAAGAGTTACGTGTAACTTATTGCATGTACTGTATGAATAAGCATCGGCTAACTCCGTGCCAGCAGCCGCGGTAATACGGAGGATGCGAGCGTTATCCGGATTTATTGGGTTTAAAGGGTGCGCAGGCGGGAACTTAAGTCAGCGGTGAAATCTCGACGCTTAACGTCGAAACTGCCGTTGAAACTGGGTTTCTTGAGTATAGATGAAGTAGGCGGAATTCGTTGTGTAGCGGTGACATGCTTAGATATAACGAGGAACTCCGATTGCGTAGGCAGCTTACTA…	Bacteroidetes	Bacteroidia	Bacteroidales	Porphyromonadaceae_1	Dysgonomonas
ACTCCTACGGGAGGCAGCAGTGAGGAATATTGGTCAATGGGGGCAACCCTGAACCAGCCATGCCGCGTGCAGGAAGACGGCTCTATGAGTTGTAAACTGCTTTTATACAGGGATAAATCCATGTACGTGTACGTGGTTGAAGGTACTGTATGAATAAGGATCGGCTAACTCCGTGCCAGCAGCCGCGGTAATACGGAGGATCCAAGCGTTATCCGGATTTATTGGGTTTAAAGGGTGCGTAGGCGGTTTGTTAAGTTAGAGGTGAAATCCGGTGGCTCAACCACCGAACTGCCTCTGATACTGGCAGGCTAGAGATTAGATGCGGTAGGCGGAATGTGTAGTGTAGCGGTGAAATGCTTAGAGATTACACAGAACACCGATTGCGAAGGCAGCTTACCA…	Bacteroidetes	Bacteroidia	Bacteroidales	Rikenellaceae	Alistipes_II
ACTCCTACGGGAGGCAGCAGTGGGGAATATTGCACAATGGGCGCAAGCCTGATGCAGCCATGCCGCGTGTATGAAGAAGGCCTTCGGGTTGTAAAGTACTTTCAGCGGGGAGGAAGGGAGTAAAGTTAATACCTTTGCTCATTGACGTTACCCGCAGAAGAAGCACCGGCTAACTCCGTGCCAGCAGCCGCGGTAATACGGAGGGTGCAAGCGTTAATCGGAATTACTGGGCGTAAAGCGCACGCAGGCGGTTTGTTAAGTCAGATGTGAAATCCCCGGGCTCAACCTGGGAACTGCATCTGATACTGGCAAGCTTGAGTCTCGTAGAGGGGGGTAGAATTCCAGGTGTAGCGGTGAAATGCGTAGAGATCTGGAGGAATACCGGTGGCGAAGGCGGCC…	Proteobacteria	Gammaproteobacteria_1	Enterobacteriales	Enterobacteriaceae	Escherichia_blattae_cluster
ACTCCTACGGGAGGCAGCAGTGAGGAATATTGGTCAATGGGCGAGAGCCTGAACCAGCCAAATCGCGTGAAGGAAGACTGCCTTATGGGTTGTAAACTTCTTTTATACAGGAATAAAAAGAGTTACGTGTAACTTATTGCATGTACTGTATGAATAAGCATCGGCTAACTCCGTGCCAGCAGCCGCGGTAATACGGAGGATGCGAGCGTTATCCGGATTTATTGGGTTTAAAGGGTGCGCAGGCGGGAACTTAAGTCAGCGGTGAAATCTCGACGCTTAACGTCGAAACTGCCGTTGAAACTGGGTTTCTTGAGTATAGATGAAGTAGGCGGAATTCGTTGTGTAGCGGTGACATGCTTAGATATAACGAGGAACTCCGATTGCGTAGGCAGCTTACTA…	Bacteroidetes	Bacteroidia	Bacteroidales	Porphyromonadaceae_1	Dysgonomonas
ACTCCTACGGGAGGCAGCAGTGAGGAATATTGGTCAATGGACGCAAGTCTGAACCAGCCATGCCGCGTGCAGGAAGACGGCTCTATGAGTTGTAAACTGCTTTTGTACGAGGGTAAACCCAGATACGTGTATCTGGCTGAAAGTATCGTACGAATAAGGATCGGCTAACTCCGTGCCAGCAGCCGCGGTAATACGGAGGATCCAAGCGTTATCCGGATTTATTGGGTTTAAAGGGTGCGTAGGCGGTTTGTTAAGTTAGAGGTGAAATCCCGTGGCTCAACCACGGAACTGCCTCTGATACTGGCAGGCTAGAGAATGGTTGCTGTGGGCGGAATGTGTGGTGTAGCGGTGAAATGCTTAGAGATCACACAGAACACCGATTGCGAAGGCAGCTCACAA…	Bacteroidetes	Bacteroidia	Bacteroidales	Rikenellaceae	Alisitpes_IV
ACTCCTACGGGAGGCAGCAGTAGGGAATCTTCGGCAATGGGCGCAAGCCTGACCGAGCAACGCCGCGTGAGTGAAGAAGGTTTTCGGATCGTAAAGCTCTGTTGATAGAGAAGAACGGGTGAGAGAGTGGAAAATTCTTGCTTTGACGGTATCTATCCAGAAAGGGACGGCTAACTACGTGCCAGCAGCCGCGGTAATACGTAGGTCCCGAGCGTTGTCCGGATTTATTGGGCGTAAAGCGAGCGCAGGTGGTTCTTTAAGTCTGATGTAAAAGGCAGTGGCTCAACCATTGTAGGCATTGGAAACTGGGGAACTTGAGTGCAGTAGAGGAGAGTGGAATTCCATGTGTAGCGGTGAAATGCGTAGATATATGGAGGAACACCGGAGGCGAAAGCGGCT…	Firmicutes	Bacilli	Lactobacillales	Streptococcaceae	Lactococcus_3
ACTCCTACGGGAGGCAGCAGTGAGGAATATTGGTCAATGGGCGAGAGCCTGAACCAGCCAAATCGCGTGAAGGAAGACTGCCTTATGGGTTGTAAACTTCTTTTATACAGGAATAAAAAGAGTTACGTGTAACTTATTGCATGTACTGTATGAATAAGCATCGGCTAACTCCGTGCCAGCAGCCGCGGTAATACGGAGGATGCGAGCGTTATCCGGATTTATTGGGTTTAAAGGGTGCGCAGGCGGGAACTTAAGTCAGCGGTGAAATCTCGACGCTTAACGTCGAAACTGCCGTTGAAACTGGGTTTCTTGAGTATAGATGAAGTAGGCGGAATTCGTTGTGTAGCGGTGACATGCTTAGATATAACGAGGAACTCCGATTGCGTAGGCAGCTTACTA…	Bacteroidetes	Bacteroidia	Bacteroidales	Porphyromonadaceae_1	Dysgonomonas
ACTCCTACGGGAGGCAGCAGTGGGGAATATTGCGCAATGGGCGAAAGCCTGACGCAGCGACGCCGCGTGAGGGATGAAGGCCTTCGGGTCGTAAACCTCTGTCAGGAGGGAAGAAGTGCGAACGTGCTAATCAGCGTTCGTTTGACGGTACCTCCAAAGGAAGCACCGGCTAACTCCGTGCCAGCAGCCGCGGTAATACGGAGGGTGCAAGCGTTAATCGGAATCACTGGGCGTAAAGCGCGCGTAGGCGGCTTGTTAAGTCAGGGGTGAAATCCCACGGCCCACCCGTGGAACTGCCCTTGATACTGTCAGGCTAGAGTGTGTGAGAGGATAGCGGAATTCCTGGTGTAGGAGTGAAATCCGTAGAGATCAGGAGGAACATCAGTGGCGAAGGCGGCT…	Proteobacteria	Deltaproteobacteria	Desulfovibrionales	Desulfovibrionaceae	Gut_cluster_3
ACTCCTACGGGAGGCAGCAGTGAGGAATATTGGTCAATGGACGAGAGTCTGAACCAGCCAAGTAGCGTGAAGGATGACTGCCCTATGGGTTGTAAACTTCTTTTATACGGGAATAAAATGCGGTACGTGTACCGTTTTGTATGTACCGTATGAATAAGGATCGGCTAACTCCGTGCCAGCAGCCGCGGTAATACGGAGGATCCGAGCGTTATCCGGATTTATTGGGTTTAAAGGGAGCGTAGGCGGAAGCTTAAGTCAGTTGTGAAAGTTTGAGGCTCAACCTTAAAATTGCAGTTGAAACTGGGTTTCTTGAGTGCGGCATAGGTGGGCGGAATTCGTGGTGTAGCGGTGAAATGCTTAGATATCACGAAGAACTCCGATTGCGAAGGCAGCTCACTG…	Bacteroidetes	Bacteroidia	Bacteroidales	Porphyromonadaceae_1	Dysgonomonas
ACTCCTACGGGAGGCAGCAGTAGGGAATCTTCGGCAATGGGCGCAAGCCTGACCGAGCAACGCCGCGTGAGTGAAGAAGGTTTTCGGATCGTAAAGCTCTGTTGATAGAGAAGAACGGGTGAGAGAGTGGAAAATTCTTGCTTTGACGGTATCTATCCAGAAAGGGACGGCTAACTACGTGCCAGCAGCCGCGGTAATACGTAGGTCCCGAGCGTTGTCCGGATTTATTGGGCGTAAAGCGAGCGCAGGTGGTTCTTTAAGTCTGATGTAAAAGGCAGTGGCTCAACCATTGTAGGCATTGGAAACTGGGGAACTTGAGTGCAGTAGAGGAGAGTGGAATTCCATGTGTAGCGGTGAAATGCGTAGATATATGGAGGAACACCGGAGGCGAAAGCGGCT…	Firmicutes	Bacilli	Lactobacillales	Streptococcaceae	Lactococcus_3
ACTCCTACGGGAGGCAGCAGTGGGGGATATTGCACAATGGGCGAAAGCCTGATGCAGCGACGCCGCGTGAGGGAAGAAGGTTTTCGGATTGTAAACCTCTGTCTTCGAGGACGAAGAAGTGACGGTACTCGAGGAGGAAGCCACGGCTAACTACGTGCCAGCAGCCGCGGTAAAACGTAGGTGGCAAGCGTTGTCCGGAATTACTGGGTGTAAAGGGAGCGCAGGCGGGACGATAAGTTGAATGTGAAATGTATGGGCTCAACCCATAGACTGCGTTCAAAACTATCGTTCTTGAGTGATGTAGAGGCAGGCGGAATTCCCGGTGTAGCGGTGGAATGCGTAGATATCGGGAGGAACACCAGTGGCGAAGGCGGCCTGCTGGGCATAAACTGACGCTGA…	Firmicutes	Clostridia_1	Clostridiales	Ruminococcaceae	Termite_cockroach_cluster
ACTCCTACGGGAGGCAGCAGTGGGGAATATTGCACAATGGGCGCAAGCCTGATGCAGCCATGCCGCGTGTATGAAGAAGGCCTTCGGGTTGTAAAGTACTTTCAGCGGGGAGGAAGGGAGTAAAGTTAATACCTTTGCTCATTGACGTTACCCGCAGAAGAAGCACCGGCTAACTCCGTGCCAGCAGCCGCGGTAATACGGAGGGTGCAAGCGTTAATCGGAATTACTGGGCGTAAAGCGCACGCAGGCGGTTTGTTAAGTCAGATGTGAAATCCCCGGGCTCAACCTGGGAACTGCATCTGATACTGGCAAGCTTGAGTCTCGTAGAGGGGGGTAGAATTCCAGGTGTAGCGGTGAAATGCGTAGAGATCTGGAGGAATACCGGTGGCGAAGGCGGCC…	Proteobacteria	Gammaproteobacteria_1	Enterobacteriales	Enterobacteriaceae	Escherichia_blattae_cluster
ACTCCTACGGGAGGCAGCAGTGAGGAATATTGGTCAATGGACGCAAGTCTGAACCAGCCATGCCGCGTGCAGGAAGACGGCTCTATGAGTTGTAAACTGCTTTTGTACGAGGGTAAACCCAGATACGTGTATCTGGCTGAAAGTATCGTACGAATAAGGATCGGCTAACTCCGTGCCAGCAGCCGCGGTAATACGGAGGATCCAAGCGTTATCCGGATTTATTGGGTTTAAAGGGTGCGTAGGCGGTTTGTTAAGTTAGAGGTGAAATCCCGTGGCTCAACCACGGAACTGCCTCTGATACTGGCAGGCTAGAGAATGGTTGCTGTGGGCGGAATGTGTGGTGTAGCGGTGAAATGCTTAGAGATCACACAGAACACCGATTGCGAAGGCAGCTCACAA…	Bacteroidetes	Bacteroidia	Bacteroidales	Rikenellaceae	Alisitpes_IV
ACTCCTACGGGAGGCAGCAGTGGGGAATATTGCACAATGGGCGCAAGCCTGATGCAGCCATGCCGCGTGTATGAAGAAGGCCTTCGGGTTGTAAAGTACTTTCAGCGGGGAGGAAGGGAGTAAAGTTAATACCTTTGCTCATTGACGTTACCCGCAGAAGAAGCACCGGCTAACTCCGTGCCAGCAGCCGCGGTAATACGGAGGGTGCAAGCGTTAATCGGAATTACTGGGCGTAAAGCGCACGCAGGCGGTTTGTTAAGTCAGATGTGAAATCCCCGGGCTCAACCTGGGAACTGCATCTGATACTGGCAAGCTTGAGTCTCGTAGAGGGGGGTAGAATTCCAGGTGTAGCGGTGAAATGCGTAGAGATCTGGAGGAATACCGGTGGCGAAGGCGGCC…	Proteobacteria	Gammaproteobacteria_1	Enterobacteriales	Enterobacteriaceae	Escherichia_blattae_cluster
ACTCCTACGGGAGGCAGCAGTGAGGAATATTCCACAATGGGCGAAAGCCTGATGGAGCAATGCCGCGTGCAGGATGAAGGCCTTCGGGTTGTAAACTGCTTTTATTAGAGAAGAATATGACGGTAACTAATGAATAAGGGTCGGCTAACTACGTGCCAGCAGCCGCGGTCATACGTAGGACCCAAGCGTTATCCGGAGTGACTGGGCGTAAAGAGTTGCGTAGGCGGTTAGATAAGCGAGTGATGAAAACTATCGGCTCAACCGGTAGCCTATTATTCGAACTGTTTAACTCGAGAGTATCAGAGGTCGCTGGAATTCCTTGTGTAGGAGTGAAATCCGTAGATATAAGGAGGAACACCAATGGCGTAGGCAGGCGACTGGGATATTTCTGACGCTAAG…	Patescibacteria	Saccharimonadia	Saccharimonadales	NA	NA
ACTCCTACGGGAGGCAGCAGTGGGGAATATTGCACAATGGGGGAAACCCTGATGCAGCAACGCCGCGTGGAGGATGAAGCATTTCGGTGTGTAAACTCCTTTTATTTGGGAAGATAATGACGGTACCAAATGAATAAGCACCGGCTAACTCCGTGCCAGCAGCCGCGGTAATACGGAGGGTGCAAGCGTTACTCGGAATTACTGGGCGTAAAGGGTGCGTAGGCGGGTTATCAAGTCTTGAGTGAAATCCAACAGCTTAACTGTTGAACTGCTTAAGAAACTGGTAGCCTAGAGTGAGGGAGAGGTAGATGGAATTGGTGGTGTAGGGGTAAAATCCATAGATATCACCAGGAATACTCATTGCGAAGGCGATCTACTGGAACTTAACTGACGCTGAGG…	Proteobacteria	Epsilonproteobacteria	Campylobacterales	Campylobacteraceae	Sulfurospirillum
ACTCCTACGGGAGGCAGCAGTAGGGAATCTTCGGCAATGGGCGCAAGCCTGACCGAGCAACGCCGCGTGAGTGAAGAAGGTTTTCGGATCGTAAAGCTCTGTTGATAGAGAAGAACGGGTGAGAGAGTGGAAAATTCTTGCTTTGACGGTATCTATCCAGAAAGGGACGGCTAACTACGTGCCAGCAGCCGCGGTAATACGTAGGTCCCGAGCGTTGTCCGGATTTATTGGGCGTAAAGCGAGCGCAGGTGGTTCTTTAAGTCTGATGTAAAAGGCAGTGGCTCAACCATTGTAGGCATTGGAAACTGGGGAACTTGAGTGCAGTAGAGGAGAGTGGAATTCCATGTGTAGCGGTGAAATGCGTAGATATATGGAGGAACACCGGAGGCGAAAGCGGCT…	Firmicutes	Bacilli	Lactobacillales	Streptococcaceae	Lactococcus_3
ACTCCTACGGGAGGCAGCAGTGGGGAATATTGCACAATGGGGGAAACCCTGATGCAGCGACGCCGCGTGAGTGAAGACGGTCTTCGGATTGTAAAGCTCTGTTGCGGGGGACGATAATGACGGTACCCCGTGAGGAAGCCACGGCTAACTACGTGCCAGCAGCCGCGGTAATACGTAGGTGGCAAGCGTTGTCCGGAATTACTGGGTGTAAAGGGAGCGTAGGCGGGCAATTAAGTTGGATGTGAAATCCACAGGCTTAACCTGTGGCGTGCATCCAAAACTGAATGTCTTGAGTGATGTAGAGGCAGGCGGAATTCCTAGTGTAGCGGTGAAATGCGTAGATATTAGGAGGAACACCAGTGGCGAAGGCGGCCTGCTGGGCATTAACTGACGCTGAGG…	Firmicutes	Clostridia_1	Clostridiales	Ruminococcaceae	Insect_cluster
ACTCCTACGGGAGGCAGCAGTGAGGAATATTGGTCAATGGGGGCAACCCTGAACCAGCCATGCCGCGTGCAGGAAGACGGCTCTATGAGTTGTAAACTGCTTTTATACAGGGATAAATCCATGTACGTGTACGTGGTTGAAGGTACTGTATGAATAAGGATCGGCTAACTCCGTGCCAGCAGCCGCGGTAATACGGAGGATCCAAGCGTTATCCGGATTTATTGGGTTTAAAGGGTGCGTAGGCGGTTTGTTAAGTTAGAGGTGAAATCCGGTGGCTCAACCACCGAACTGCCTCTGATACTGGCAGGCTAGAGATTAGATGCGGTAGGCGGAATGTGTAGTGTAGCGGTGAAATGCTTAGAGATTACACAGAACACCGATTGCGAAGGCAGCTTACCA…	Bacteroidetes	Bacteroidia	Bacteroidales	Rikenellaceae	Alistipes_II
ACTCCTACGGGAGGCAGCAGTGGGGAATATTGCACAATGGGCGCAAGCCTGATGCAGCCATGCCGCGTGTATGAAGAAGGCCTTCGGGTTGTAAAGTACTTTCAGCGGGGAGGAAGGGAGTAAAGTTAATACCTTTGCTCATTGACGTTACCCGCAGAAGAAGCACCGGCTAACTCCGTGCCAGCAGCCGCGGTAATACGGAGGGTGCAAGCGTTAATCGGAATTACTGGGCGTAAAGCGCACGCAGGCGGTTTGTTAAGTCAGATGTGAAATCCCCGGGCTCAACCTGGGAACTGCATCTGATACTGGCAAGCTTGAGTCTCGTAGAGGGGGGTAGAATTCCAGGTGTAGCGGTGAAATGCGTAGAGATCTGGAGGAATACCGGTGGCGAAGGCGGCC…	Proteobacteria	Gammaproteobacteria_1	Enterobacteriales	Enterobacteriaceae	Escherichia_blattae_cluster
ACTCCTACGGGAGGCAGCAGTGGGGAATATTGCACAATGGGCGAAAGCCTGATGCAGCAACGCCGCGTGAGTGATGACGGTCTTCGGATTGTAAAGCTCTTTGATTAGGGACGATAATGACGGTACCTAAAGAACAAGCCACGGCTAACTACGTGCCAGCAGCCGCGGTAATACGTAGGTGGCAAGCGTTGTCCGGATTTATTGGGCGTAAAGGGAGCGTAGGCGGACCTTTAAGTCAGATGTGAAATACCCAGGGCTCAACCCGGGTGCTGCATTTGATACTGGAGGTCTAGAGTACAGGAGAGGAGAGTGGAATTCCTAGTGTAGCGGTGAAATGCGTAGAGATTAGGAAGAACACCAGTGGCGAAGGCGACTCTCTGGACTGTAACTGACGCTGAG…	Firmicutes	Clostridia_1	Clostridiales	Clostridiaceae_1	Arthropod_cluster
ACTCCTACGGGAGGCAGCAGTGGGGAATATTGCACAATGGGGGAAACCCTGATGCAGCGACGCCGCGTGAGTGAAGACGGTCTTCGGATTGTAAAGCTCTGTTGCGGGGGACGATAATGACGGTACCCCGTGAGGAAGCCACGGCTAACTACGTGCCAGCAGCCGCGGTAATACGTAGGTGGCAAGCGTTGTCCGGAATTACTGGGTGTAAAGGGAGCGTAGGCGGGCAATTAAGTTGGATGTGAAATCCACAGGCTTAACCTGTGGCGTGCATCCAAAACTGAATGTCTTGAGTGATGTAGAGGCAGGCGGAATTCCTAGTGTAGCGGTGAAATGCGTAGATATTAGGAGGAACACCAGTGGCGAAGGCGGCCTGCTGGGCATTAACTGACGCTGAGG…	Firmicutes	Clostridia_1	Clostridiales	Ruminococcaceae	Insect_cluster
ACTCCTACGGGAGGCAGCAGTGGGGAATATTGGGCAATGGGCGAAAGCCTGACCCAGCAACGCCGCGTGAGGGAAGAAGGTTTTCGGATCGTAAACCTCTGTCGCAAGGGACGAGTAGAAGACGGTACCTTGCAAGGAAGCTCCGGCTAACTACGTGCCAGCAGCCGCGGTAATACGTAGGGAGCGAGCGTTGTCCGGAATGACTGGGCGTAAAGGGCGCGTAGGTGGCCCTATAAGTTAGGAGTGAAAGTCCCGCTTTCAAGGTGGGAATTGCTTTTAATACTGTAGGGCTTGAGTGTGGGAGAGGATAGCGGAATTCCCGGTGTAGCGGTGAAATGCGTAGAGATCGGGAGGAACACCAGTGGCGAAGGCGGCTATCTGGACCAAGACTGACACTGA…	Firmicutes	Clostridia_1	Clostridiales	Lachnospiraceae	Gut_cluster_13
ACTCCTACGGGAGGCAGCAGTGGGGAATATTGCGCAATGGGCGAAAGCCTGACGCAGCGACGCCGCGTGAGGGATGAAGGCCTTCGGGTCGTAAACCTCTGTCAGGAGGGAAGAAGTGCGAACGTGCTAATCAGCGTTCGTTTGACGGTACCTCCAAAGGAAGCACCGGCTAACTCCGTGCCAGCAGCCGCGGTAATACGGAGGGTGCAAGCGTTAATCGGAATCACTGGGCGTAAAGCGCGCGTAGGCGGCTTGTTAAGTCAGGGGTGAAATCCCACGGCCCACCCGTGGAACTGCCCTTGATACTGTCAGGCTAGAGTGTGTGAGAGGATAGCGGAATTCCTGGTGTAGGAGTGAAATCCGTAGAGATCAGGAGGAACATCAGTGGCGAAGGCGGCT…	Proteobacteria	Deltaproteobacteria	Desulfovibrionales	Desulfovibrionaceae	Gut_cluster_3
ACTCCTACGGGAGGCAGCAGTGGGGAATATTGCACAATGGGGGAAACCCTGATGCAGCAACGCCGCGTGGAGGATGAAGCATTTCGGTGTGTAAACTCCTTTTATTTGGGAAGATAATGACGGTACCAAATGAATAAGCACCGGCTAACTCCGTGCCAGCAGCCGCGGTAATACGGAGGGTGCAAGCGTTACTCGGAATTACTGGGCGTAAAGGGTGCGTAGGCGGGTTATCAAGTCTTGAGTGAAATCCAACAGCTTAACTGTTGAACTGCTTAAGAAACTGGTAGCCTAGAGTGAGGGAGAGGTAGATGGAATTGGTGGTGTAGGGGTAAAATCCATAGATATCACCAGGAATACTCATTGCGAAGGCGATCTACTGGAACTTAACTGACGCTGAGG…	Proteobacteria	Epsilonproteobacteria	Campylobacterales	Campylobacteraceae	Sulfurospirillum
ACTCCTACGGGAGGCAGCAGTGGGGAATATTGCACAATGGGCGCAAGCCTGATGCAGCCATGCCGCGTGTATGAAGAAGGCCTTCGGGTTGTAAAGTACTTTCAGCGGGGAGGAAGGGAGTAAAGTTAATACCTTTGCTCATTGACGTTACCCGCAGAAGAAGCACCGGCTAACTCCGTGCCAGCAGCCGCGGTAATACGGAGGGTGCAAGCGTTAATCGGAATTACTGGGCGTAAAGCGCACGCAGGCGGTTTGTTAAGTCAGATGTGAAATCCCCGGGCTCAACCTGGGAACTGCATCTGATACTGGCAAGCTTGAGTCTCGTAGAGGGGGGTAGAATTCCAGGTGTAGCGGTGAAATGCGTAGAGATCTGGAGGAATACCGGTGGCGAAGGCGGCC…	Proteobacteria	Gammaproteobacteria_1	Enterobacteriales	Enterobacteriaceae	Escherichia_blattae_cluster
ACTCCTACGGGAGGCAGCAGTGGGGAATATTGCGCAATGGGCGAAAGCCTGACGCAGCGACGCCGCGTGAGGGATGAAGGCCTTCGGGTCGTAAACCTCTGTCAGGAGGGAAGAAGTGCGAACGTGCTAATCAGCGTTCGTTTGACGGTACCTCCAAAGGAAGCACCGGCTAACTCCGTGCCAGCAGCCGCGGTAATACGGAGGGTGCAAGCGTTAATCGGAATCACTGGGCGTAAAGCGCGCGTAGGCGGCTTGTTAAGTCAGGGGTGAAATCCCACGGCCCACCCGTGGAACTGCCCTTGATACTGTCAGGCTAGAGTGTGTGAGAGGATAGCGGAATTCCTGGTGTAGGAGTGAAATCCGTAGAGATCAGGAGGAACATCAGTGGCGAAGGCGGCT…	Proteobacteria	Deltaproteobacteria	Desulfovibrionales	Desulfovibrionaceae	Gut_cluster_3
ACTCCTACGGGAGGCAGCAGTGGGGAATATTGCACAATGGGCGAAAGCCTGATGCAGCAACGCCGCGTGAGTGATGACGGTCTTCGGATTGTAAAGCTCTTTGATTAGGGACGATAATGACGGTACCTAAAGAACAAGCCACGGCTAACTACGTGCCAGCAGCCGCGGTAATACGTAGGTGGCAAGCGTTGTCCGGATTTATTGGGCGTAAAGGGAGCGTAGGCGGACCTTTAAGTCAGATGTGAAATACCCAGGGCTCAACCCGGGTGCTGCATTTGATACTGGAGGTCTAGAGTACAGGAGAGGAGAGTGGAATTCCTAGTGTAGCGGTGAAATGCGTAGAGATTAGGAAGAACACCAGTGGCGAAGGCGACTCTCTGGACTGTAACTGACGCTGAG…	Firmicutes	Clostridia_1	Clostridiales	Clostridiaceae_1	Arthropod_cluster
ACTCCTACGGGAGGCAGCAGTGGGGAATTTTGGACAATGGGGGCAACCCTGATCCAGCCATGCCGCGTGAGTGAAGAAGGCCTTCGGGTTGTAAAGCTCTTTTGTACGGGAAGAAAAGGTTATTGCTAATATCGATGATACTTGACGGTACCGTAAGAATAAGCACCGGCTAACTACGTGCCAGCAGCCGCGGTAATACGTAGGGTGCAAGCGTTAATCGGAATTACTGGGCGTAAAGCGTGCGCAGGCGGCTTGTTGTGTCTGCTGTGAAATCCCCGGGCTTAACCTGGGAACTGCGGTGGAAACTGGCAAGCTTGAGTGTGGCAGAGGGGGGTGGAATTCCACGTGTAGCAGTGAAATGCGTAGAGATGTGGAGGAACACCGATGGCGAAGGCAGCC…	Proteobacteria	Betaproteobacteria	Rhodocyclales	Rhodocyclaceae_3	Termite_cluster
ACTCCTACGGGAGGCAGCAGTAGGGAATCTTCGGCAATGGGGGGGACCCTGACCGAGCAACGCCGCGTGAGTGAAGAAGGTTTTCGGATCGTAAAACTCTGTTGTAAGTAAAGAACGGGTGAGAGAGTGGAAAGCTCTCACTATGACGGTAACTTACCAGAAAGGGACGGCTAACTACGTGCCAGCAGCCGCGGTAATACGTAGGTCCCGAGCGTTGTCCGGATTTATTGGGCGTAAAGCGAGCGCAGGTGGTTTTTTAAGTCTGGTGTAAAAGGCTACTGCTTAACAGTAGTATGCATTGGAAACTGGAGAACTTGAGTGCAGGAGAGGAGAGTGGAATTCCATGTGTAGCGGTGAAATGCGTAGATATATGGAGGAACACCGGAGGCGAAAGCGGCT…	Firmicutes	Bacilli	Lactobacillales	Enterococcaceae	Enterococcus_3
ACTCCTACGGGAGGCAGCAGTGAGGAATATTGGTCAATGGGGGCAACCCTGAACCAGCCATGCCGCGTGCAGGAAGACGGCTCTATGAGTTGTAAACTGCTTTTATACAGGGATAAATCCATGTACGTGTACGTGGTTGAAGGTACTGTATGAATAAGGATCGGCTAACTCCGTGCCAGCAGCCGCGGTAATACGGAGGATCCAAGCGTTATCCGGATTTATTGGGTTTAAAGGGTGCGTAGGCGGTTTGTTAAGTTAGAGGTGAAATCCGGTGGCTCAACCACCGAACTGCCTCTGATACTGGCAGGCTAGAGATTAGATGCGGTAGGCGGAATGTGTAGTGTAGCGGTGAAATGCTTAGAGATTACACAGAACACCGATTGCGAAGGCAGCTTACCA…	Bacteroidetes	Bacteroidia	Bacteroidales	Rikenellaceae	Alistipes_II
ACTCCTACGGGAGGCAGCAGTGGGGAATATTGCACAATGGGGGAAACCCTGATGCAGCGACGCCGCGTGAGTGAAGAAGTATTTCGGTATGTAAAGCTCTATCAGCAGGGAAGAAAATGACGGTACCTGACTAAGAAGCCCCGGCTAACTACGTGCCAGCAGCCGCGGTAATACGTAGGGGGCAAGCGTTATCCGGATTTACTGGGTGTAAAGGGAGCGTAGACGGCATGGTAAGTCTGAAGTGAAAGCCCGGGGCTCAACCCCGTGGACTGCTTTGGAAACTGTCAGGCTAGAGTGCAGGAGAGGTAAGTGGAATTCCTAGTGTAGCGGTGGAATGCGTAGATATTAGGAGGAACACCAGTGGCGAAGGCGGCTTACTGGACTGTAACTGACGTTGAG…	Firmicutes	Clostridia_1	Clostridiales	Lachnospiraceae	Uncultured_13
ACTCCTACGGGAGGCAGCAGTGGGGAATATTGCACAATGGGCGCAAGCCTGATGCAGCCATGCCGCGTGTATGAAGAAGGCCTTCGGGTTGTAAAGTACTTTCAGCGGGGAGGAAGGGAGTAAAGTTAATACCTTTGCTCATTGACGTTACCCGCAGAAGAAGCACCGGCTAACTCCGTGCCAGCAGCCGCGGTAATACGGAGGGTGCAAGCGTTAATCGGAATTACTGGGCGTAAAGCGCACGCAGGCGGTTTGTTAAGTCAGATGTGAAATCCCCGGGCTCAACCTGGGAACTGCATCTGATACTGGCAAGCTTGAGTCTCGTAGAGGGGGGTAGAATTCCAGGTGTAGCGGTGAAATGCGTAGAGATCTGGAGGAATACCGGTGGCGAAGGCGGCC…	Proteobacteria	Gammaproteobacteria_1	Enterobacteriales	Enterobacteriaceae	Escherichia_blattae_cluster
ACTCCTACGGGAGGCAGCAGTGGGGGATATTGCACAATGGGCGAAAGCCTGATGCAGCGACGCCGCGTGAGGGAAGAAGGTTTTCGGATTGTAAACCTCTGTCTTCGAGGACGAAGAAGTGACGGTACTCGAGGAGGAAGCCACGGCTAACTACGTGCCAGCAGCCGCGGTAAAACGTAGGTGGCAAGCGTTGTCCGGAATTACTGGGTGTAAAGGGAGCGCAGGCGGGACGATAAGTTGAATGTGAAATGTATGGGCTCAACCCATAGACTGCGTTCAAAACTATCGTTCTTGAGTGATGTAGAGGCAGGCGGAATTCCCGGTGTAGCGGTGGAATGCGTAGATATCGGGAGGAACACCAGTGGCGAAGGCGGCCTGCTGGGCATAAACTGACGCTGA…	Firmicutes	Clostridia_1	Clostridiales	Ruminococcaceae	Termite_cockroach_cluster
ACTCCTACGGGAGGCAGCAGTGGGGAATATTGCGCAATGGGCGAAAGCCTGACGCAGCGACGCCGCGTGAGGGATGAAGGCCTTCGGGTCGTAAACCTCTGTCAGGAGGGAAGAAGTGCGAACGTGCTAATCAGCGTTCGTTTGACGGTACCTCCAAAGGAAGCACCGGCTAACTCCGTGCCAGCAGCCGCGGTAATACGGAGGGTGCAAGCGTTAATCGGAATCACTGGGCGTAAAGCGCGCGTAGGCGGCTTGTTAAGTCAGGGGTGAAATCCCACGGCCCACCCGTGGAACTGCCCTTGATACTGTCAGGCTAGAGTGTGTGAGAGGATAGCGGAATTCCTGGTGTAGGAGTGAAATCCGTAGAGATCAGGAGGAACATCAGTGGCGAAGGCGGCT…	Proteobacteria	Deltaproteobacteria	Desulfovibrionales	Desulfovibrionaceae	Gut_cluster_3
ACTCCTACGGGAGGCAGCAGTGAGGAATATTCCACAATGGGCGAAAGCCTGATGGAGCAATGCCGCGTGCAGGATGAAGGCCTTCGGGTTGTAAACTGCTTTTATTAGAGAAGAATATGACGGTAACTAATGAATAAGGGTCGGCTAACTACGTGCCAGCAGCCGCGGTCATACGTAGGACCCAAGCGTTATCCGGAGTGACTGGGCGTAAAGAGTTGCGTAGGCGGTTAGATAAGCGAGTGATGAAAACTATCGGCTCAACCGGTAGCCTATTATTCGAACTGTTTAACTCGAGAGTATCAGAGGTCGCTGGAATTCCTTGTGTAGGAGTGAAATCCGTAGATATAAGGAGGAACACCAATGGCGTAGGCAGGCGACTGGGATATTTCTGACGCTAAG…	Patescibacteria	Saccharimonadia	Saccharimonadales	NA	NA
ACTCCTACGGGAGGCAGCAGTGGGGAATATTGCACAATGGGGGAAACCCTGATGCAGCAACGCCGCGTGGAGGATGAAGCATTTCGGTGTGTAAACTCCTTTTATTTGGGAAGATAATGACGGTACCAAATGAATAAGCACCGGCTAACTCCGTGCCAGCAGCCGCGGTAATACGGAGGGTGCAAGCGTTACTCGGAATTACTGGGCGTAAAGGGTGCGTAGGCGGGTTATCAAGTCTTGAGTGAAATCCAACAGCTTAACTGTTGAACTGCTTAAGAAACTGGTAGCCTAGAGTGAGGGAGAGGTAGATGGAATTGGTGGTGTAGGGGTAAAATCCATAGATATCACCAGGAATACTCATTGCGAAGGCGATCTACTGGAACTTAACTGACGCTGAGG…	Proteobacteria	Epsilonproteobacteria	Campylobacterales	Campylobacteraceae	Sulfurospirillum
ACTCCTACGGGAGGCAGCAGTGGGGAATTTTGGACAATGGGGGCAACCCTGATCCAGCCATGCCGCGTGAGTGAAGAAGGCCTTCGGGTTGTAAAGCTCTTTTGTACGGGAAGAAAAGGTTATTGCTAATATCGATGATACTTGACGGTACCGTAAGAATAAGCACCGGCTAACTACGTGCCAGCAGCCGCGGTAATACGTAGGGTGCAAGCGTTAATCGGAATTACTGGGCGTAAAGCGTGCGCAGGCGGCTTGTTGTGTCTGCTGTGAAATCCCCGGGCTTAACCTGGGAACTGCGGTGGAAACTGGCAAGCTTGAGTGTGGCAGAGGGGGGTGGAATTCCACGTGTAGCAGTGAAATGCGTAGAGATGTGGAGGAACACCGATGGCGAAGGCAGCC…	Proteobacteria	Betaproteobacteria	Rhodocyclales	Rhodocyclaceae_3	Termite_cluster
ACTCCTACGGGAGGCAGCAGTGAGGAATATTGGTCAATGGACGAGAGTCTGAACCAGCCAAGTAGCGTGAAGGATGACTGCCCTATGGGTTGTAAACTTCTTTTATACGGGAATAAAATGCGGTACGTGTACCGTTTTGTATGTACCGTATGAATAAGGATCGGCTAACTCCGTGCCAGCAGCCGCGGTAATACGGAGGATCCGAGCGTTATCCGGATTTATTGGGTTTAAAGGGAGCGTAGGCGGAAGCTTAAGTCAGTTGTGAAAGTTTGAGGCTCAACCTTAAAATTGCAGTTGAAACTGGGTTTCTTGAGTGCGGCATAGGTGGGCGGAATTCGTGGTGTAGCGGTGAAATGCTTAGATATCACGAAGAACTCCGATTGCGAAGGCAGCTCACTG…	Bacteroidetes	Bacteroidia	Bacteroidales	Porphyromonadaceae_1	Dysgonomonas
ACTCCTACGGGAGGCAGCAGTGGGGAATATTGGGCAATGGGCGAAAGCCTGACCCAGCAACGCCGCGTGAGGGAAGAAGGTTTTCGGATCGTAAACCTCTGTCGCAAGGGACGAGTAGAAGACGGTACCTTGCAAGGAAGCTCCGGCTAACTACGTGCCAGCAGCCGCGGTAATACGTAGGGAGCGAGCGTTGTCCGGAATGACTGGGCGTAAAGGGCGCGTAGGTGGCCCTATAAGTTAGGAGTGAAAGTCCCGCTTTCAAGGTGGGAATTGCTTTTAATACTGTAGGGCTTGAGTGTGGGAGAGGATAGCGGAATTCCCGGTGTAGCGGTGAAATGCGTAGAGATCGGGAGGAACACCAGTGGCGAAGGCGGCTATCTGGACCAAGACTGACACTGA…	Firmicutes	Clostridia_1	Clostridiales	Lachnospiraceae	Gut_cluster_13
ACTCCTACGGGAGGCAGCAGTGGGGAATATTGCACAATGGGGGAAACCCTGATGCAGCAACGCCGCGTGGAGGATGAAGCATTTCGGTGTGTAAACTCCTTTTATTTGGGAAGATAATGACGGTACCAAATGAATAAGCACCGGCTAACTCCGTGCCAGCAGCCGCGGTAATACGGAGGGTGCAAGCGTTACTCGGAATTACTGGGCGTAAAGGGTGCGTAGGCGGGTTATCAAGTCTTGAGTGAAATCCAACAGCTTAACTGTTGAACTGCTTAAGAAACTGGTAGCCTAGAGTGAGGGAGAGGTAGATGGAATTGGTGGTGTAGGGGTAAAATCCATAGATATCACCAGGAATACTCATTGCGAAGGCGATCTACTGGAACTTAACTGACGCTGAGG…	Proteobacteria	Epsilonproteobacteria	Campylobacterales	Campylobacteraceae	Sulfurospirillum
ACTCCTACGGGAGGCAGCAGTGGGGAATATTGCACAATGGGCGAAAGCCTGATGCAGCAACGCCGCGTGAGTGATGACGGTCTTCGGATTGTAAAGCTCTTTGATTAGGGACGATAATGACGGTACCTAAAGAACAAGCCACGGCTAACTACGTGCCAGCAGCCGCGGTAATACGTAGGTGGCAAGCGTTGTCCGGATTTATTGGGCGTAAAGGGAGCGTAGGCGGACCTTTAAGTCAGATGTGAAATACCCAGGGCTCAACCCGGGTGCTGCATTTGATACTGGAGGTCTAGAGTACAGGAGAGGAGAGTGGAATTCCTAGTGTAGCGGTGAAATGCGTAGAGATTAGGAAGAACACCAGTGGCGAAGGCGACTCTCTGGACTGTAACTGACGCTGAG…	Firmicutes	Clostridia_1	Clostridiales	Clostridiaceae_1	Arthropod_cluster
ACTCCTACGGGAGGCAGCAGTGGGGAATATTGCACAATGGGGGAAACCCTGATGCAGCGACGCCGCGTGAGTGAAGACGGTCTTCGGATTGTAAAGCTCTGTTGCGGGGGACGATAATGACGGTACCCCGTGAGGAAGCCACGGCTAACTACGTGCCAGCAGCCGCGGTAATACGTAGGTGGCAAGCGTTGTCCGGAATTACTGGGTGTAAAGGGAGCGTAGGCGGGCAATTAAGTTGGATGTGAAATCCACAGGCTTAACCTGTGGCGTGCATCCAAAACTGAATGTCTTGAGTGATGTAGAGGCAGGCGGAATTCCTAGTGTAGCGGTGAAATGCGTAGATATTAGGAGGAACACCAGTGGCGAAGGCGGCCTGCTGGGCATTAACTGACGCTGAGG…	Firmicutes	Clostridia_1	Clostridiales	Ruminococcaceae	Insect_cluster
ACTCCTACGGGAGGCAGCAGTGGGGAATATTGCACAATGGGGGAAACCCTGATGCAGCAACGCCGCGTGGAGGATGAAGCATTTCGGTGTGTAAACTCCTTTTATTTGGGAAGATAATGACGGTACCAAATGAATAAGCACCGGCTAACTCCGTGCCAGCAGCCGCGGTAATACGGAGGGTGCAAGCGTTACTCGGAATTACTGGGCGTAAAGGGTGCGTAGGCGGGTTATCAAGTCTTGAGTGAAATCCAACAGCTTAACTGTTGAACTGCTTAAGAAACTGGTAGCCTAGAGTGAGGGAGAGGTAGATGGAATTGGTGGTGTAGGGGTAAAATCCATAGATATCACCAGGAATACTCATTGCGAAGGCGATCTACTGGAACTTAACTGACGCTGAGG…	Proteobacteria	Epsilonproteobacteria	Campylobacterales	Campylobacteraceae	Sulfurospirillum
ACTCCTACGGGAGGCAGCAGTGGGGAATATTGCACAATGGACGGAAGTCTGATGCAGCAACGCCGCGTGGAGGATGACACATTTCGGTGCGTAAACTCCTTTTATGTAAGAAGATAATGACGGTATTATATGAATAAGCACCGGCTAACTCCGTGCCAGCAGCCGCGGTAATACGGGGGGTGCAAGCGTTACTCGGAATCACTGGGCGTAAAGAGCGTGTAGGCGGATTGATAAGTTTGAAGTGAAATCCTATAGCTTAACTATAGAACTGCTTTGAAAACTGTTAGTCTAGAATGTGGGAGAGGTAGATGGAATTTCTGGTGTAGGGGTAAAATCCGTAGAGATCAGAAGGAATACCGATTGCGAAGGCGATCTACTGGAACAATATTGACGCTGAGA…	Proteobacteria	Epsilonproteobacteria	Campylobacterales	Campylobacteraceae	Arcobacter
ACTCCTACGGGAGGCAGCAGTGAGGAATATTGGTCAATGGACGCAAGTCTGAACCAGCCATGCCGCGTGCAGGAAGACGGCTCTATGAGTTGTAAACTGCTTTTGTGCGAGGGTAAACCCCCTTACGTGTAAGGGGCTGAAAGTATCGTACGAATAAGGATCGGCTAACTCCGTGCCAGCAGCCGCGGTAATACGGAGGATCCAAGCGTTATCCGGATTTATTGGGTTTAAAGGGTGCGTAGGCGGTTTGTTAAGTTAGAGGTGAAATCCCGTGGCTCAACCACGGAACTGCCTCTGATACTGGCAGGCTAGAGAATGGTTGCTGTGGGCGGAATGTGTGGTGTAGCGGTGAAATGCTTAGAGATCACACAGAACACCGATTGCGAAGGCAGCTCACAA…	Bacteroidetes	Bacteroidia	Bacteroidales	Rikenellaceae	Alisitpes_IV
ACTCCTACGGGAGGCAGCAGTGAGGAATATTGGTCAATGGGGGCAACCCTGAACCAGCCATGCCGCGTGCAGGAAGACGGCTCTATGAGTTGTAAACTGCTTTTATACAGGGATAAATCATGATACGTGTATCATGTTGCAGGTACTGTATGAATAAGGATCGGCTAACTCCGTGCCAGCAGCCGCGGTAATACGGAGGATCCAAGCGTTATCCGGATTTATTGGGTTTAAAGGGTGCGTAGGCGGCACGGTAAGTTAGCGGTGAAATCGCGGGGCTCAACCCCGCAACTGCCGTTAAAACTGCCGAGCTAGAGAGTAGATGCGGTAGGCGGAATGTGTAGTGTAGCGGTGAAATGCTTAGAGATTACACAGAACACCGATTGCGAAGGCAGCTTACCA…	Bacteroidetes	Bacteroidia	Bacteroidales	Rikenellaceae	Alistipes_II
ACTCCTACGGGAGGCAGCAGTAGGGAATCTTCGGCAATGGGCGCAAGCCTGACCGAGCAACGCCGCGTGAGTGAAGAAGGTTTTCGGATCGTAAAGCTCTGTTGATAGAGAAGAACGGGTGAGAGAGTGGAAAATTCTTGCTTTGACGGTATCTATCCAGAAAGGGACGGCTAACTACGTGCCAGCAGCCGCGGTAATACGTAGGTCCCGAGCGTTGTCCGGATTTATTGGGCGTAAAGCGAGCGCAGGTGGTTCTTTAAGTCTGATGTAAAAGGCAGTGGCTCAACCATTGTAGGCATTGGAAACTGGGGAACTTGAGTGCAGTAGAGGAGAGTGGAATTCCATGTGTAGCGGTGAAATGCGTAGATATATGGAGGAACACCGGAGGCGAAAGCGGCT…	Firmicutes	Bacilli	Lactobacillales	Streptococcaceae	Lactococcus_3
ACTCCTACGGGAGGCAGCAGTGAGGAATATTGGTCAATGGGGGCAACCCTGAACCAGCCATGCCGCGTGCAGGAAGACGGCTCTATGAGTTGTAAACTGCTTTTATACAGGGATAAATCCATGTACGTGTACGTGGTTGAAGGTACTGTATGAATAAGGATCGGCTAACTCCGTGCCAGCAGCCGCGGTAATACGGAGGATCCAAGCGTTATCCGGATTTATTGGGTTTAAAGGGTGCGTAGGCGGTTTGTTAAGTTAGAGGTGAAATCCGGTGGCTCAACCACCGAACTGCCTCTGATACTGGCAGGCTAGAGATTAGATGCGGTAGGCGGAATGTGTAGTGTAGCGGTGAAATGCTTAGAGATTACACAGAACACCGATTGCGAAGGCAGCTTACCA…	Bacteroidetes	Bacteroidia	Bacteroidales	Rikenellaceae	Alistipes_II
ACTCCTACGGGAGGCAGCAGTGGGGAATATTGCGCAATGGGCGAAAGCCTGACGCAGCGACGCCGCGTGAGGGATGAAGGCCTTCGGGTCGTAAACCTCTGTCAGGAGGGAAGAAGTGCGAACGTGCTAATCAGCGTTCGTTTGACGGTACCTCCAAAGGAAGCACCGGCTAACTCCGTGCCAGCAGCCGCGGTAATACGGAGGGTGCAAGCGTTAATCGGAATCACTGGGCGTAAAGCGCGCGTAGGCGGCTTGTTAAGTCAGGGGTGAAATCCCACGGCCCACCCGTGGAACTGCCCTTGATACTGTCAGGCTAGAGTGTGTGAGAGGATAGCGGAATTCCTGGTGTAGGAGTGAAATCCGTAGAGATCAGGAGGAACATCAGTGGCGAAGGCGGCT…	Proteobacteria	Deltaproteobacteria	Desulfovibrionales	Desulfovibrionaceae	Gut_cluster_3
ACTCCTACGGGAGGCAGCAGTGGGGAATATTGCGCAATGGGCGAAAGCCTGACGCAGCGACGCCGCGTGAGGGATGAAGGCCTTCGGGTCGTAAACCTCTGTCAGGAGGGAAGAAGTGCGAACGTGCTAATCAGCGTTCGTTTGACGGTACCTCCAAAGGAAGCACCGGCTAACTCCGTGCCAGCAGCCGCGGTAATACGGAGGGTGCAAGCGTTAATCGGAATCACTGGGCGTAAAGCGCGCGTAGGCGGCTTGTTAAGTCAGGGGTGAAATCCCACGGCCCACCCGTGGAACTGCCCTTGATACTGTCAGGCTAGAGTGTGTGAGAGGATAGCGGAATTCCTGGTGTAGGAGTGAAATCCGTAGAGATCAGGAGGAACATCAGTGGCGAAGGCGGCT…	Proteobacteria	Deltaproteobacteria	Desulfovibrionales	Desulfovibrionaceae	Gut_cluster_3
ACTCCTACGGGAGGCAGCAGTGAGGAATATTGGTCAATGGACGAGAGTCTGAACCAGCCAAGTAGCGTGAAGGATGACTGCCCTATGGGTTGTAAACTTCTTTTATACGGGAATAAAATGCGGTACGTGTACCGTTTTGTATGTACCGTATGAATAAGGATCGGCTAACTCCGTGCCAGCAGCCGCGGTAATACGGAGGATCCGAGCGTTATCCGGATTTATTGGGTTTAAAGGGAGCGTAGGCGGAAGCTTAAGTCAGTTGTGAAAGTTTGAGGCTCAACCTTAAAATTGCAGTTGAAACTGGGTTTCTTGAGTGCGGCATAGGTGGGCGGAATTCGTGGTGTAGCGGTGAAATGCTTAGATATCACGAAGAACTCCGATTGCGAAGGCAGCTCACTG…	Bacteroidetes	Bacteroidia	Bacteroidales	Porphyromonadaceae_1	Dysgonomonas
ACTCCTACGGGAGGCAGCAGTAGGGAATCTTCGGCAATGGGCGCAAGCCTGACCGAGCAACGCCGCGTGAGTGAAGAAGGTTTTCGGATCGTAAAGCTCTGTTGATAGAGAAGAACGGGTGAGAGAGTGGAAAATTCTTGCTTTGACGGTATCTATCCAGAAAGGGACGGCTAACTACGTGCCAGCAGCCGCGGTAATACGTAGGTCCCGAGCGTTGTCCGGATTTATTGGGCGTAAAGCGAGCGCAGGTGGTTCTTTAAGTCTGATGTAAAAGGCAGTGGCTCAACCATTGTAGGCATTGGAAACTGGGGAACTTGAGTGCAGTAGAGGAGAGTGGAATTCCATGTGTAGCGGTGAAATGCGTAGATATATGGAGGAACACCGGAGGCGAAAGCGGCT…	Firmicutes	Bacilli	Lactobacillales	Streptococcaceae	Lactococcus_3
ACTCCTACGGGAGGCAGCAGTGGGGAATATTGCACAATGGGGGAAACCCTGATGCAGCGACGCCGCGTGAGTGAAGAAGTATTTCGGTATGTAAAGCTCTATCAGCAGGGAAGAAAATGACGGTACCTGACTAAGAAGCCCCGGCTAACTACGTGCCAGCAGCCGCGGTAATACGTAGGGGGCAAGCGTTATCCGGATTTACTGGGTGTAAAGGGAGCGTAGACGGCATGGTAAGTCTGAAGTGAAAGCCCGGGGCTCAACCCCGTGGACTGCTTTGGAAACTGTCAGGCTAGAGTGCAGGAGAGGTAAGTGGAATTCCTAGTGTAGCGGTGGAATGCGTAGATATTAGGAGGAACACCAGTGGCGAAGGCGGCTTACTGGACTGTAACTGACGTTGAG…	Firmicutes	Clostridia	Clostridiales	Lachnospiraceae	NA
ACTCCTACGGGAGGCAGCAGTGGGGAATATTGGGCAATGGGCGAAAGCCTGACCCAGCAACGCCGCGTGAGGGAAGAAGGTTTTCGGATCGTAAACCTCTGTCGCAAGGGACGAGTAGAAGACGGTACCTTGCAAGGAAGCTCCGGCTAACTACGTGCCAGCAGCCGCGGTAATACGTAGGGAGCGAGCGTTGTCCGGAATGACTGGGCGTAAAGGGCGCGTAGGTGGCCCTATAAGTTAGGAGTGAAAGTCCCGCTTTCAAGGTGGGAATTGCTTTTAATACTGTAGGGCTTGAGTGTGGGAGAGGATAGCGGAATTCCCGGTGTAGCGGTGAAATGCGTAGAGATCGGGAGGAACACCAGTGGCGAAGGCGGCTATCTGGACCAAGACTGACACTGA…	Firmicutes	Clostridia_1	Clostridiales	Lachnospiraceae	Gut_cluster_13
ACTCCTACGGGAGGCAGCAGTGGGGAATATTGCACAATGGGGGAAACCCTGATGCAGCGACGCCGCGTGAGTGAAGACGGTCTTCGGATTGTAAAGCTCTGTTGCGGGGGACGATAATGACGGTACCCCGTGAGGAAGCCACGGCTAACTACGTGCCAGCAGCCGCGGTAATACGTAGGTGGCAAGCGTTGTCCGGAATTACTGGGTGTAAAGGGAGCGTAGGCGGGCAATTAAGTTGGATGTGAAATCCACAGGCTTAACCTGTGGCGTGCATCCAAAACTGAATGTCTTGAGTGATGTAGAGGCAGGCGGAATTCCTAGTGTAGCGGTGAAATGCGTAGATATTAGGAGGAACACCAGTGGCGAAGGCGGCCTGCTGGGCATTAACTGACGCTGAGG…	Firmicutes	Clostridia_1	Clostridiales	Ruminococcaceae	Insect_cluster
ACTCCTACGGGAGGCAGCAGTGAGGAATATTGGTCAATGGACGAGAGTCTGAACCAGCCAAGTAGCGTGAAGGATGACTGCCCTATGGGTTGTAAACTTCTTTTATACGGGAATAAAATGCGGTACGTGTACCGTTTTGTATGTACCGTATGAATAAGGATCGGCTAACTCCGTGCCAGCAGCCGCGGTAATACGGAGGATCCGAGCGTTATCCGGATTTATTGGGTTTAAAGGGAGCGTAGGCGGAAGCTTAAGTCAGTTGTGAAAGTTTGAGGCTCAACCTTAAAATTGCAGTTGAAACTGGGTTTCTTGAGTGCGGCATAGGTGGGCGGAATTCGTGGTGTAGCGGTGAAATGCTTAGATATCACGAAGAACTCCGATTGCGAAGGCAGCTCACTG…	Bacteroidetes	Bacteroidia	Bacteroidales	Porphyromonadaceae_1	Dysgonomonas
ACTCCTACGGGAGGCAGCAGTGAGGAATATTGGTCAATGGACGCAAGTCTGAACCAGCCATGCCGCGTGCAGGAAGACGGCTCTATGAGTTGTAAACTGCTTTTGTACGAGGGTAAACCCAGATACGTGTATCTGGCTGAAAGTATCGTACGAATAAGGATCGGCTAACTCCGTGCCAGCAGCCGCGGTAATACGGAGGATCCAAGCGTTATCCGGATTTATTGGGTTTAAAGGGTGCGTAGGCGGTTTGTTAAGTTAGAGGTGAAATCCCGTGGCTCAACCACGGAACTGCCTCTGATACTGGCAGGCTAGAGAATGGTTGCTGTGGGCGGAATGTGTGGTGTAGCGGTGAAATGCTTAGAGATCACACAGAACACCGATTGCGAAGGCAGCTCACAA…	Bacteroidetes	Bacteroidia	Bacteroidales	Rikenellaceae	Alisitpes_IV
ACTCCTACGGGAGGCAGCAGTGAGGAATATTGGTCAATGGTCGGAAGACTGAACCAGCCAAGTCGCGTGAAGGAAGAAGGATCTATGGTTCGTAAACTTCTTTTATGGGGGAATAAGTATGGGGACGTGTCCCTGTTTATTGCATGTACCCCATGAATAAGCATCGGCTAACTCCGTGCCAGCAGCCGCGGTAATACGGAGGATGCGAGCGTTATCCGGATTTATTGGGTTTAAAGGGTGCGTAGGTGGATGTTTAAGTCCGCGGTGAAAGGTTGTCGCTTAACGATAAAATTGCCGTTGAAACTGGATATCTTGAGTATGTTTGAAGTAGGCGGAATGCGTGGTGTAGCGGTGAAATGCATAGATATCACGCAGAACTCCGATAGCGAAGGCAGCTTA…	Bacteroidetes	Bacteroidia	Bacteroidales	Porphyromonadaceae_3	Tannerella
ACTCCTACGGGAGGCAGCAGTGGGGAATTTTGGACAATGGGGGCAACCCTGATCCAGCCATGCCGCGTGAGTGAAGAAGGCCTTCGGGTTGTAAAGCTCTTTTGTACGGGAAGAAAAGGTTATTGCTAATATCGATGATACTTGACGGTACCGTAAGAATAAGCACCGGCTAACTACGTGCCAGCAGCCGCGGTAATACGTAGGGTGCAAGCGTTAATCGGAATTACTGGGCGTAAAGCGTGCGCAGGCGGCTTGTTGTGTCTGCTGTGAAATCCCCGGGCTTAACCTGGGAACTGCGGTGGAAACTGGCAAGCTTGAGTGTGGCAGAGGGGGGTGGAATTCCACGTGTAGCAGTGAAATGCGTAGAGATGTGGAGGAACACCGATGGCGAAGGCAGCC…	Proteobacteria	Betaproteobacteria	Rhodocyclales	Rhodocyclaceae_3	Termite_cluster
ACTCCTACGGGAGGCAGCAGTGGGGAATATTGCACAATGGGGGAAACCCTGATGCAGCAACGCCGCGTGGAGGATGAAGCATTTCGGTGTGTAAACTCCTTTTATTTGGGAAGATAATGACGGTACCAAATGAATAAGCACCGGCTAACTCCGTGCCAGCAGCCGCGGTAATACGGAGGGTGCAAGCGTTACTCGGAATTACTGGGCGTAAAGGGTGCGTAGGCGGGTTATCAAGTCTTGAGTGAAATCCAACAGCTTAACTGTTGAACTGCTTAAGAAACTGGTAGCCTAGAGTGAGGGAGAGGTAGATGGAATTGGTGGTGTAGGGGTAAAATCCATAGATATCACCAGGAATACTCATTGCGAAGGCGATCTACTGGAACTTAACTGACGCTGAGG…	Proteobacteria	Epsilonproteobacteria	Campylobacterales	Campylobacteraceae	Sulfurospirillum
ACTCCTACGGGAGGCAGCAGTGAGGAATATTGGTCAATGGGCGAGAGCCTGAACCAGCCAAATCGCGTGAAGGAAGACTGCCTTATGGGTTGTAAACTTCTTTTATACAGGAATAAAAAGAGTTACGTGTAACTTATTGCATGTACTGTATGAATAAGCATCGGCTAACTCCGTGCCAGCAGCCGCGGTAATACGGAGGATGCGAGCGTTATCCGGATTTATTGGGTTTAAAGGGTGCGCAGGCGGGAACTTAAGTCAGCGGTGAAATCTCGACGCTTAACGTCGAAACTGCCGTTGAAACTGGGTTTCTTGAGTATAGATGAAGTAGGCGGAATTCGTTGTGTAGCGGTGACATGCTTAGATATAACGAGGAACTCCGATTGCGTAGGCAGCTTACTA…	Bacteroidetes	Bacteroidia	Bacteroidales	Porphyromonadaceae_1	Dysgonomonas
ACTCCTACGGGAGGCAGCAGTGGGGAATATTGCGCAATGGGCGAAAGCCTGACGCAGCGACGCCGCGTGAGGGATGAAGGCCTTCGGGTCGTAAACCTCTGTCAGGAGGGAAGAAGTGCGAACGTGCTAATCAGCGTTCGTTTGACGGTACCTCCAAAGGAAGCACCGGCTAACTCCGTGCCAGCAGCCGCGGTAATACGGAGGGTGCAAGCGTTAATCGGAATCACTGGGCGTAAAGCGCGCGTAGGCGGCTTGTTAAGTCAGGGGTGAAATCCCACGGCCCACCCGTGGAACTGCCCTTGATACTGTCAGGCTAGAGTGTGTGAGAGGATAGCGGAATTCCTGGTGTAGGAGTGAAATCCGTAGAGATCAGGAGGAACATCAGTGGCGAAGGCGGCT…	Proteobacteria	Deltaproteobacteria	Desulfovibrionales	Desulfovibrionaceae	Gut_cluster_3
ACTCCTACGGGAGGCAGCAGTGGGGGATATTGCACAATGGGCGAAAGCCTGATGCAGCGACGCCGCGTGAGGGAAGAAGGTTTTCGGATTGTAAACCTCTGTCTTCGAGGACGAAGAAGTGACGGTACTCGAGGAGGAAGCCACGGCTAACTACGTGCCAGCAGCCGCGGTAAAACGTAGGTGGCAAGCGTTGTCCGGAATTACTGGGTGTAAAGGGAGCGCAGGCGGGACGATAAGTTGAATGTGAAATGTATGGGCTCAACCCATAGACTGCGTTCAAAACTATCGTTCTTGAGTGATGTAGAGGCAGGCGGAATTCCCGGTGTAGCGGTGGAATGCGTAGATATCGGGAGGAACACCAGTGGCGAAGGCGGCCTGCTGGGCATAAACTGACGCTGA…	Firmicutes	Clostridia_1	Clostridiales	Ruminococcaceae	Termite_cockroach_cluster
ACTCCTACGGGAGGCAGCAGTGGGGAATATTGGGCAATGGGCGAAAGCCTGACCCAGCAACGCCGCGTGAGGGAAGAAGGTTTTCGGATCGTAAACCTCTGTCGCAAGGGACGAGTAGAAGACGGTACCTTGCAAGGAAGCTCCGGCTAACTACGTGCCAGCAGCCGCGGTAATACGTAGGGAGCGAGCGTTGTCCGGAATGACTGGGCGTAAAGGGCGCGTAGGTGGCCCTATAAGTTAGGAGTGAAAGTCCCGCTTTCAAGGTGGGAATTGCTTTTAATACTGTAGGGCTTGAGTGTGGGAGAGGATAGCGGAATTCCCGGTGTAGCGGTGAAATGCGTAGAGATCGGGAGGAACACCAGTGGCGAAGGCGGCTATCTGGACCAAGACTGACACTGA…	Firmicutes	Clostridia_1	Clostridiales	Lachnospiraceae	Gut_cluster_13
ACTCCTACGGGAGGCAGCAGTGAGGAATATTGGTCAATGGTCGGAAGACTGAACCAGCCAAGTCGCGTGAAGGAAGAAGGATCTATGGTTCGTAAACTTCTTTTATGGGGGAATAAGTATGGGGACGTGTCCCTGTTTATTGCATGTACCCCATGAATAAGCATCGGCTAACTCCGTGCCAGCAGCCGCGGTAATACGGAGGATGCGAGCGTTATCCGGATTTATTGGGTTTAAAGGGTGCGTAGGTGGATGTTTAAGTCCGCGGTGAAAGGTTGTCGCTTAACGATAAAATTGCCGTTGAAACTGGATATCTTGAGTATGTTTGAAGTAGGCGGAATGCGTGGTGTAGCGGTGAAATGCATAGATATCACGCAGAACTCCGATAGCGAAGGCAGCTTA…	Bacteroidetes	Bacteroidia	Bacteroidales	Porphyromonadaceae_3	Tannerella
ACTCCTACGGGAGGCAGCAGTGGGGAATATTGCACAATGGGCGCAAGCCTGATGCAGCCATGCCGCGTGTATGAAGAAGGCCTTCGGGTTGTAAAGTACTTTCAGCGGGGAGGAAGGGAGTAAAGTTAATACCTTTGCTCATTGACGTTACCCGCAGAAGAAGCACCGGCTAACTCCGTGCCAGCAGCCGCGGTAATACGGAGGGTGCAAGCGTTAATCGGAATTACTGGGCGTAAAGCGCACGCAGGCGGTTTGTTAAGTCAGATGTGAAATCCCCGGGCTCAACCTGGGAACTGCATCTGATACTGGCAAGCTTGAGTCTCGTAGAGGGGGGTAGAATTCCAGGTGTAGCGGTGAAATGCGTAGAGATCTGGAGGAATACCGGTGGCGAAGGCGGCC…	Proteobacteria	Gammaproteobacteria_1	Enterobacteriales	Enterobacteriaceae	Escherichia_blattae_cluster
ACTCCTACGGGAGGCAGCAGTGGGGAATATTGCACAATGGGGGAAACCCTGATGCAGCGACGCCGCGTGAGTGAAGAAGTATTTCGGTATGTAAAGCTCTATCAGCAGGGAAGAAAATGACGGTACCTGACTAAGAAGCCCCGGCTAACTACGTGCCAGCAGCCGCGGTAATACGTAGGGGGCAAGCGTTATCCGGATTTACTGGGTGTAAAGGGAGCGTAGACGGCATGGTAAGTCTGAAGTGAAAGCCCGGGGCTCAACCCCGTGGACTGCTTTGGAAACTGTCAGGCTAGAGTGCAGGAGAGGTAAGTGGAATTCCTAGTGTAGCGGTGGAATGCGTAGATATTAGGAGGAACACCAGTGGCGAAGGCGGCTTACTGGACTGTAACTGACGTTGAG…	Firmicutes	Clostridia_1	Clostridiales	Lachnospiraceae	Uncultured_13
ACTCCTACGGGAGGCAGCAGTGGGGAATATTGCACAATGGGCGAAAGCCTGATGCAGCAACGCCGCGTGAGTGATGACGGTCTTCGGATTGTAAAGCTCTTTGATTAGGGACGATAATGACGGTACCTAAAGAACAAGCCACGGCTAACTACGTGCCAGCAGCCGCGGTAATACGTAGGTGGCAAGCGTTGTCCGGATTTATTGGGCGTAAAGGGAGCGTAGGCGGACCTTTAAGTCAGATGTGAAATACCCAGGGCTCAACCCGGGTGCTGCATTTGATACTGGAGGTCTAGAGTACAGGAGAGGAGAGTGGAATTCCTAGTGTAGCGGTGAAATGCGTAGAGATTAGGAAGAACACCAGTGGCGAAGGCGACTCTCTGGACTGTAACTGACGCTGAG…	Firmicutes	Clostridia_1	Clostridiales	Clostridiaceae_1	Arthropod_cluster
ACTCCTACGGGAGGCAGCAGTGAGGAATATTGGTCAATGGGGGCAACCCTGAACCAGCCATGCCGCGTGCAGGAAGACGGCTCTATGAGTTGTAAACTGCTTTTATACAGGGATAAATCATGATACGTGTATCATGTTGCAGGTACTGTATGAATAAGGATCGGCTAACTCCGTGCCAGCAGCCGCGGTAATACGGAGGATCCAAGCGTTATCCGGATTTATTGGGTTTAAAGGGTGCGTAGGCGGCACGGTAAGTTAGCGGTGAAATCGCGGGGCTCAACCCCGCAACTGCCGTTAAAACTGCCGAGCTAGAGAGTAGATGCGGTAGGCGGAATGTGTAGTGTAGCGGTGAAATGCTTAGAGATTACACAGAACACCGATTGCGAAGGCAGCTTACCA…	Bacteroidetes	Bacteroidia	Bacteroidales	Rikenellaceae	Alistipes_II
ACTCCTACGGGAGGCAGCAGTGGGGAATATTGCACAATGGGGGAAACCCTGATGCAGCGACGCCGCGTGAGTGAAGAAGTATTTCGGTATGTAAAGCTCTATCAGCAGGGAAGAAAATGACGGTACCTGACTAAGAAGCCCCGGCTAACTACGTGCCAGCAGCCGCGGTAATACGTAGGGGGCAAGCGTTATCCGGATTTACTGGGTGTAAAGGGAGCGTAGACGGCATGGTAAGTCTGAAGTGAAAGCCCGGGGCTCAACCCCGTGGACTGCTTTGGAAACTGTCAGGCTAGAGTGCAGGAGAGGTAAGTGGAATTCCTAGTGTAGCGGTGGAATGCGTAGATATTAGGAGGAACACCAGTGGCGAAGGCGGCTTACTGGACTGTAACTGACGTTGAG…	Firmicutes	Clostridia_1	Clostridiales	Lachnospiraceae	Uncultured_13
ACTCCTACGGGAGGCAGCAGTGAGGAATATTGGTCAATGGTCGGAAGACTGAACCAGCCAAGTCGCGTGAAGGAAGAAGGATCTATGGTTCGTAAACTTCTTTTATGGGGGAATAAGTATGGGGACGTGTCCCTGTTTATTGCATGTACCCCATGAATAAGCATCGGCTAACTCCGTGCCAGCAGCCGCGGTAATACGGAGGATGCGAGCGTTATCCGGATTTATTGGGTTTAAAGGGTGCGTAGGTGGATGTTTAAGTCCGCGGTGAAAGGTTGTCGCTTAACGATAAAATTGCCGTTGAAACTGGATATCTTGAGTATGTTTGAAGTAGGCGGAATGCGTGGTGTAGCGGTGAAATGCATAGATATCACGCAGAACTCCGATAGCGAAGGCAGCTTA…	Bacteroidetes	Bacteroidia	Bacteroidales	Porphyromonadaceae_3	Tannerella
ACTCCTACGGGAGGCAGCAGTGGGGAATATTGGGCAATGGGCGAAAGCCTGACCCAGCAACGCCGCGTGAGGGAAGAAGGTTTTCGGATCGTAAACCTCTGTCGCAAGGGACGAGTAGAAGACGGTACCTTGCAAGGAAGCTCCGGCTAACTACGTGCCAGCAGCCGCGGTAATACGTAGGGAGCGAGCGTTGTCCGGAATGACTGGGCGTAAAGGGCGCGTAGGTGGCCCTATAAGTTAGGAGTGAAAGTCCCGCTTTCAAGGTGGGAATTGCTTTTAATACTGTAGGGCTTGAGTGTGGGAGAGGATAGCGGAATTCCCGGTGTAGCGGTGAAATGCGTAGAGATCGGGAGGAACACCAGTGGCGAAGGCGGCTATCTGGACCAAGACTGACACTGA…	Firmicutes	Clostridia_1	Clostridiales	Lachnospiraceae	Gut_cluster_13
ACTCCTACGGGAGGCAGCAGTGGGGAATTTTGGACAATGGGCGAAAGCCTGATCCAGCAATGCCGCGTGTGTGAAGAAGGCCTTCGGGTTGTAAAGCACTTTTGTCCGGAAAGAAATCCTTGGCTCTAATACAGTCGGGGGATGACGGTACCGGAAGAATAAGCACCGGCTAACTACGTGCCAGCAGCCGCGGTAATACGTAGGGTGCGAGCGTTAATCGGAATTACTGGGCGTAAAGCGTGCGCAGGCGGTTTGCTAAGACCGATGTGAAATCCCCGGGCTCAACCTGGGAACTGCATTGGTGACTGGCAGGCTAGAGTATGGCAGAGGGGGGTAGAATTCCACGTGTAGCAGTGAAATGCGTAGAGATGTGGAGGAATACCGATGGCGAAGGCAGCC…	Proteobacteria	Betaproteobacteria	Rhodocyclales	Rhodocyclaceae_3	Termite_cluster
ACTCCTACGGGAGGCAGCAGTGAGGAATATTGGTCAATGGTCGGAAGACTGAACCAGCCAAGTCGCGTGAAGGAAGAAGGATCTATGGTTCGTAAACTTCTTTTATGGGGGAATAAGTATGGGGACGTGTCCCTGTTTATTGCATGTACCCCATGAATAAGCATCGGCTAACTCCGTGCCAGCAGCCGCGGTAATACGGAGGATGCGAGCGTTATCCGGATTTATTGGGTTTAAAGGGTGCGTAGGTGGATGTTTAAGTCCGCGGTGAAAGGTTGTCGCTTAACGATAAAATTGCCGTTGAAACTGGATATCTTGAGTATGTTTGAAGTAGGCGGAATGCGTGGTGTAGCGGTGAAATGCATAGATATCACGCAGAACTCCGATAGCGAAGGCAGCTTA…	Bacteroidetes	Bacteroidia	Bacteroidales	Porphyromonadaceae_3	Tannerella
ACTCCTACGGGAGGCAGCAGTGAGGAATATTGGTCAATGGGGGCAACCCTGAACCAGCCATGCCGCGTGCAGGAAGACGGCTCTATGAGTTGTAAACTGCTTTTATACAGGGATAAATCCATGTACGTGTACGTGGTTGAAGGTACTGTATGAATAAGGATCGGCTAACTCCGTGCCAGCAGCCGCGGTAATACGGAGGATCCAAGCGTTATCCGGATTTATTGGGTTTAAAGGGTGCGTAGGCGGTTTGTTAAGTTAGAGGTGAAATCCGGTGGCTCAACCACCGAACTGCCTCTGATACTGGCAGGCTAGAGATTAGATGCGGTAGGCGGAATGTGTAGTGTAGCGGTGAAATGCTTAGAGATTACACAGAACACCGATTGCGAAGGCAGCTTACCA…	Bacteroidetes	Bacteroidia	Bacteroidales	Rikenellaceae	Alistipes_II
ACTCCTACGGGAGGCAGCAGTGAGGAATATTGGTCAATGGACGCAAGTCTGAACCAGCCATGCCGCGTGCAGGAAGACGGCTCTATGAGTTGTAAACTGCTTTTGTGCGAGGGTAAACCCCCTTACGTGTAAGGGGCTGAAAGTATCGTACGAATAAGGATCGGCTAACTCCGTGCCAGCAGCCGCGGTAATACGGAGGATCCAAGCGTTATCCGGATTTATTGGGTTTAAAGGGTGCGTAGGCGGTTTGTTAAGTTAGAGGTGAAATCCCGTGGCTCAACCACGGAACTGCCTCTGATACTGGCAGGCTAGAGAATGGTTGCTGTGGGCGGAATGTGTGGTGTAGCGGTGAAATGCTTAGAGATCACACAGAACACCGATTGCGAAGGCAGCTCACAA…	Bacteroidetes	Bacteroidia	Bacteroidales	Rikenellaceae	Alisitpes_IV
ACTCCTACGGGAGGCAGCAGTGGGGAATATTGCACAATGGACGGAAGTCTGATGCAGCAACGCCGCGTGGAGGATGACACATTTCGGTGCGTAAACTCCTTTTATGTAAGAAGATAATGACGGTATTATATGAATAAGCACCGGCTAACTCCGTGCCAGCAGCCGCGGTAATACGGGGGGTGCAAGCGTTACTCGGAATCACTGGGCGTAAAGAGCGTGTAGGCGGATTGATAAGTTTGAAGTGAAATCCTATAGCTTAACTATAGAACTGCTTTGAAAACTGTTAGTCTAGAATGTGGGAGAGGTAGATGGAATTTCTGGTGTAGGGGTAAAATCCGTAGAGATCAGAAGGAATACCGATTGCGAAGGCGATCTACTGGAACAATATTGACGCTGAGA…	Proteobacteria	Epsilonproteobacteria	Campylobacterales	Campylobacteraceae	Arcobacter
ACTCCTACGGGAGGCAGCAGTGGGGAATTTTGGACAATGGGGGCAACCCTGATCCAGCCATGCCGCGTGAGTGAAGAAGGCCTTCGGGTTGTAAAGCTCTTTTGTACGGGAAGAAAAGGTTATTGCTAATATCGATGATACTTGACGGTACCGTAAGAATAAGCACCGGCTAACTACGTGCCAGCAGCCGCGGTAATACGTAGGGTGCAAGCGTTAATCGGAATTACTGGGCGTAAAGCGTGCGCAGGCGGCTTGTTGTGTCTGCTGTGAAATCCCCGGGCTTAACCTGGGAACTGCGGTGGAAACTGGCAAGCTTGAGTGTGGCAGAGGGGGGTGGAATTCCACGTGTAGCAGTGAAATGCGTAGAGATGTGGAGGAACACCGATGGCGAAGGCAGCC…	Proteobacteria	Betaproteobacteria	Rhodocyclales	Rhodocyclaceae_3	Termite_cluster
ACTCCTACGGGAGGCAGCAGTGAGGAATATTGGTCAATGGACGCAAGTCTGAACCAGCCATGCCGCGTGCAGGAAGACGGCTCTATGAGTTGTAAACTGCTTTTGTGCGAGGGTAAACCCCCTTACGTGTAAGGGGCTGAAAGTATCGTACGAATAAGGATCGGCTAACTCCGTGCCAGCAGCCGCGGTAATACGGAGGATCCAAGCGTTATCCGGATTTATTGGGTTTAAAGGGTGCGTAGGCGGTTTGTTAAGTTAGAGGTGAAATCCCGTGGCTCAACCACGGAACTGCCTCTGATACTGGCAGGCTAGAGAATGGTTGCTGTGGGCGGAATGTGTGGTGTAGCGGTGAAATGCTTAGAGATCACACAGAACACCGATTGCGAAGGCAGCTCACAA…	Bacteroidetes	Bacteroidia	Bacteroidales	Rikenellaceae	Alisitpes_IV
ACTCCTACGGGAGGCAGCAGTGAGGAATATTGGTCAATGGACGAGAGTCTGAACCAGCCAAGTAGCGTGAAGGATGACTGCCCTATGGGTTGTAAACTTCTTTTATACGGGAATAAAATGCGGTACGTGTACCGTTTTGTATGTACCGTATGAATAAGGATCGGCTAACTCCGTGCCAGCAGCCGCGGTAATACGGAGGATCCGAGCGTTATCCGGATTTATTGGGTTTAAAGGGAGCGTAGGCGGAAGCTTAAGTCAGTTGTGAAAGTTTGAGGCTCAACCTTAAAATTGCAGTTGAAACTGGGTTTCTTGAGTGCGGCATAGGTGGGCGGAATTCGTGGTGTAGCGGTGAAATGCTTAGATATCACGAAGAACTCCGATTGCGAAGGCAGCTCACTG…	Bacteroidetes	Bacteroidia	Bacteroidales	Porphyromonadaceae_1	Dysgonomonas
ACTCCTACGGGAGGCAGCAGTGGGGAATATTGCACAATGGACGGAAGTCTGATGCAGCAACGCCGCGTGGAGGATGACACATTTCGGTGCGTAAACTCCTTTTATGTAAGAAGATAATGACGGTATTATATGAATAAGCACCGGCTAACTCCGTGCCAGCAGCCGCGGTAATACGGGGGGTGCAAGCGTTACTCGGAATCACTGGGCGTAAAGAGCGTGTAGGCGGATTGATAAGTTTGAAGTGAAATCCTATAGCTTAACTATAGAACTGCTTTGAAAACTGTTAGTCTAGAATGTGGGAGAGGTAGATGGAATTTCTGGTGTAGGGGTAAAATCCGTAGAGATCAGAAGGAATACCGATTGCGAAGGCGATCTACTGGAACAATATTGACGCTGAGA…	Proteobacteria	Epsilonproteobacteria	Campylobacterales	Campylobacteraceae	Arcobacter
ACTCCTACGGGAGGCAGCAGTGGGGAATATTGGGCAATGGGCGAAAGCCTGACCCAGCAACGCCGCGTGAGGGAAGAAGGTTTTCGGATCGTAAACCTCTGTCGCAAGGGACGAGTAGAAGACGGTACCTTGCAAGGAAGCTCCGGCTAACTACGTGCCAGCAGCCGCGGTAATACGTAGGGAGCGAGCGTTGTCCGGAATGACTGGGCGTAAAGGGCGCGTAGGTGGCCCTATAAGTTAGGAGTGAAAGTCCCGCTTTCAAGGTGGGAATTGCTTTTAATACTGTAGGGCTTGAGTGTGGGAGAGGATAGCGGAATTCCCGGTGTAGCGGTGAAATGCGTAGAGATCGGGAGGAACACCAGTGGCGAAGGCGGCTATCTGGACCAAGACTGACACTGA…	Firmicutes	Clostridia_1	Clostridiales	Lachnospiraceae	Gut_cluster_13
ACTCCTACGGGAGGCAGCAGTGGGGAATTTTGGACAATGGGGGCAACCCTGATCCAGCCATGCCGCGTGAGTGAAGAAGGCCTTCGGGTTGTAAAGCTCTTTTGTACGGGAAGAAAAGGTTATTGCTAATATCGATGATACTTGACGGTACCGTAAGAATAAGCACCGGCTAACTACGTGCCAGCAGCCGCGGTAATACGTAGGGTGCAAGCGTTAATCGGAATTACTGGGCGTAAAGCGTGCGCAGGCGGCTTGTTGTGTCTGCTGTGAAATCCCCGGGCTTAACCTGGGAACTGCGGTGGAAACTGGCAAGCTTGAGTGTGGCAGAGGGGGGTGGAATTCCACGTGTAGCAGTGAAATGCGTAGAGATGTGGAGGAACACCGATGGCGAAGGCAGCC…	Proteobacteria	Betaproteobacteria	Rhodocyclales	Rhodocyclaceae_3	Termite_cluster
ACTCCTACGGGAGGCAGCAGTGAGGAATCTTCCACAATGGGCGAAAGCCTGATGGAGCAATGCCGCGTGCAGGATGAAGGCCTTCGGGTTGTAAACTGCTTTTATTAGAGAAGAATATGACGGTAACTAATGAATAAGGGTCGGCTAACTACGTGCCAGCAGCCGCGGTCATACGTAGGACCCAAGCGTTATCCGGAGTGACTGGGCGTAAAGAGTTGCGTAGGCGGCGTGCTAAGCGAGTAGTGAAAATTATCGGCTCAACCGATAACCTATTATTCGAACTGGCATGCTCGAGAATAGTAGAGGTAGCTGGAATTACTAGTGTAGGAGTGGAATCCGTAGATATTAGTAGGAACACCAATGGCGTAGGCAGGCTACTGGACTATTTCTGACGCTAAG…	Patescibacteria	Saccharimonadia	Saccharimonadales	NA	NA
ACTCCTACGGGAGGCAGCAGTGGGGAATATTGGACAATGGGCGAAAGCCTGATCCAGCAATGCCGCGTGAGTGATGAAGGCCTTAGGGTTGTAAAGCTCTTTTACCCGGGATGATAATGACAGTACCGGGAGAATAAGCTCCGGCTAACTCCGTGCCAGCAGCCGCGGTAATACGGAGGGAGCTAGCGTTATTCGGAATTACTGGGCGTAAAGCGCACGTAGGCGGCTTTGTAAGTTAGAGGTGAAAGCCTGGAGCTCAACTCCAGAATTGCCTTTAAGACTGCATCGCTTGAATCCAGGAGAGGTGAGTGGAATTCCGAGTGTAGAGGTGAAATTCGTAGATATTCGGAAGAACACCAGTGGCGAAGGCGGCTCACTGGACTGGTATTGACGCTGAGG…	Proteobacteria	Alphaproteobacteria	Sphingomonadales	Sphingomonadaceae	Sphingomonas
ACTCCTACGGGAGGCAGCAGTGAGGAATATTGGTCAATGGGGGCAACCCTGAACCAGCCATGCCGCGTGCAGGAAGACGGCTCTATGAGTTGTAAACTGCTTTTGTACAGGGATAAATACATATACGTGTATATGTTTGAAGGTACTGTACGAATAAGGATCGGCTAACTCCGTGCCAGCAGCCGCGGTAATACGGAGGATCCGAGCGTTATCCGGATTTATTGGGTTTAAAGGGTGCGTAGGCGGCGAGGTAAGTTAGAGGTGAAATCCCGTGGCTCAACCACGGAACCGCCTCTGATACTGCTTTGCTAGAGAGTAGATGCGGTAGGCGGAATGTGTAGTGTAGCGGTGAAATGCTTAGAGATTACACAGAACACCGATTGCGAAGGCAGCTTACCA…	Bacteroidetes	Bacteroidia	Bacteroidales	Rikenellaceae	Alistipes_II
ACTCCTACGGGAGGCAGCAGTGGGGGATATTGCACAATGGGCGAAAGCCTGATGCAGCGACGCCGCGTGAGGGAAGAAGGTTTTCGGATTGTAAACCTCTGTCTTCGAGGACGAAGAAGTGACGGTACTCGAGGAGGAAGCCACGGCTAACTACGTGCCAGCAGCCGCGGTAAAACGTAGGTGGCAAGCGTTGTCCGGAATTACTGGGTGTAAAGGGAGCGCAGGCGGGACGATAAGTTGAATGTGAAATGTATGGGCTCAACCCATAGACTGCGTTCAAAACTATCGTTCTTGAGTGATGTAGAGGCAGGCGGAATTCCCGGTGTAGCGGTGGAATGCGTAGATATCGGGAGGAACACCAGTGGCGAAGGCGGCCTGCTGGGCATAAACTGACGCTGA…	Firmicutes	Clostridia_1	Clostridiales	Ruminococcaceae	Termite_cockroach_cluster
ACTCCTACGGGAGGCAGCAGTGAGGAATATTCCACAATGGGCGAAAGCCTGATGGAGCAATGCCGCGTGCAGGATGAAGGCCTTCGGGTTGTAAACTGCTTTTATTAGAGAAGAATATGACGGTAACTAATGAATAAGGGTCGGCTAACTACGTGCCAGCAGCCGCGGTCATACGTAGGACCCAAGCGTTATCCGGAGTGACTGGGCGTAAAGAGTTGCGTAGGCGGTTAGATAAGCGAGTGATGAAAACTATCGGCTCAACCGGTAGCCTATTATTCGAACTGTTTAACTCGAGAGTATCAGAGGTCGCTGGAATTCCTTGTGTAGGAGTGAAATCCGTAGATATAAGGAGGAACACCAATGGCGTAGGCAGGCGACTGGGATATTTCTGACGCTAAG…	Patescibacteria	Saccharimonadia	Saccharimonadales	NA	NA
ACTCCTACGGGAGGCAGCAGTGAGGAATATTGGTCAATGGACGAGAGTCTGAACCAGCCAAGTAGCGTGAAGGATGACTGCCCTATGGGTTGTAAACTTCTTTTATACGGGAATAAAATGCGGTACGTGTACCGTTTTGTATGTACCGTATGAATAAGGATCGGCTAACTCCGTGCCAGCAGCCGCGGTAATACGGAGGATCCGAGCGTTATCCGGATTTATTGGGTTTAAAGGGAGCGTAGGCGGAAGCTTAAGTCAGTTGTGAAAGTTTGAGGCTCAACCTTAAAATTGCAGTTGAAACTGGGTTTCTTGAGTGCGGCATAGGTGGGCGGAATTCGTGGTGTAGCGGTGAAATGCTTAGATATCACGAAGAACTCCGATTGCGAAGGCAGCTCACTG…	Bacteroidetes	Bacteroidia	Bacteroidales	Porphyromonadaceae_1	Dysgonomonas
ACTCCTACGGGAGGCAGCAGTGGGGAATATTGCACAATGGACGGAAGTCTGATGCAGCAACGCCGCGTGGAGGATGACACATTTCGGTGCGTAAACTCCTTTTATGTAAGAAGATAATGACGGTATTATATGAATAAGCACCGGCTAACTCCGTGCCAGCAGCCGCGGTAATACGGGGGGTGCAAGCGTTACTCGGAATCACTGGGCGTAAAGAGCGTGTAGGCGGATTGATAAGTTTGAAGTGAAATCCTATAGCTTAACTATAGAACTGCTTTGAAAACTGTTAGTCTAGAATGTGGGAGAGGTAGATGGAATTTCTGGTGTAGGGGTAAAATCCGTAGAGATCAGAAGGAATACCGATTGCGAAGGCGATCTACTGGAACAATATTGACGCTGAGA…	Proteobacteria	Epsilonproteobacteria	Campylobacterales	Campylobacteraceae	Arcobacter
ACTCCTACGGGAGGCAGCAGTGGGGAATATTGCACAATGGGCGAAAGCCTGATGCAGCAACGCCGCGTGAGTGATGACGGTCTTCGGATTGTAAAGCTCTTTGATTAGGGACGATAATGACGGTACCTAAAGAACAAGCCACGGCTAACTACGTGCCAGCAGCCGCGGTAATACGTAGGTGGCAAGCGTTGTCCGGATTTATTGGGCGTAAAGGGAGCGTAGGCGGACCTTTAAGTCAGATGTGAAATACCCAGGGCTCAACCCGGGTGCTGCATTTGATACTGGAGGTCTAGAGTACAGGAGAGGAGAGTGGAATTCCTAGTGTAGCGGTGAAATGCGTAGAGATTAGGAAGAACACCAGTGGCGAAGGCGACTCTCTGGACTGTAACTGACGCTGAG…	Firmicutes	Clostridia_1	Clostridiales	Clostridiaceae_1	Arthropod_cluster
ACTCCTACGGGAGGCAGCAGTGAGGAATATTGGTCAATGGGGGCAACCCTGAACCAGCCATGCCGCGTGCAGGAAGACGGCTCTATGAGTTGTAAACTGCTTTTATACAGGGATAAATCCATGTACGTGTACGTGGTTGAAGGTACTGTATGAATAAGGATCGGCTAACTCCGTGCCAGCAGCCGCGGTAATACGGAGGATCCAAGCGTTATCCGGATTTATTGGGTTTAAAGGGTGCGTAGGCGGTTTGTTAAGTTAGAGGTGAAATCCGGTGGCTCAACCACCGAACTGCCTCTGATACTGGCAGGCTAGAGATTAGATGCGGTAGGCGGAATGTGTAGTGTAGCGGTGAAATGCTTAGAGATTACACAGAACACCGATTGCGAAGGCAGCTTACCA…	Bacteroidetes	Bacteroidia	Bacteroidales	Rikenellaceae	Alistipes_II
ACTCCTACGGGAGGCAGCAGTGAGGAATATTGGTCAATGGGGGCAACCCTGAACCAGCCATGCCGCGTGCAGGAAGACGGCTCTATGAGTTGTAAACTGCTTTTATACAGGGATAAATCATGATACGTGTATCATGTTGCAGGTACTGTATGAATAAGGATCGGCTAACTCCGTGCCAGCAGCCGCGGTAATACGGAGGATCCAAGCGTTATCCGGATTTATTGGGTTTAAAGGGTGCGTAGGCGGCACGGTAAGTTAGCGGTGAAATCGCGGGGCTCAACCCCGCAACTGCCGTTAAAACTGCCGAGCTAGAGAGTAGATGCGGTAGGCGGAATGTGTAGTGTAGCGGTGAAATGCTTAGAGATTACACAGAACACCGATTGCGAAGGCAGCTTACCA…	Bacteroidetes	Bacteroidia	Bacteroidales	Rikenellaceae	Alistipes_II
ACTCCTACGGGAGGCAGCAGTGGGGAATATTGCGCAATGGGCGAAAGCCTGACGCAGCGACGCCGCGTGAGGGATGAAGGCCTTCGGGTCGTAAACCTCTGTCAGGAGGGAAGAAGTGCGAACGTGCTAATCAGCGTTCGTTTGACGGTACCTCCAAAGGAAGCACCGGCTAACTCCGTGCCAGCAGCCGCGGTAATACGGAGGGTGCAAGCGTTAATCGGAATCACTGGGCGTAAAGCGCGCGTAGGCGGCTTGTTAAGTCAGGGGTGAAATCCCACGGCCCACCCGTGGAACTGCCCTTGATACTGTCAGGCTAGAGTGTGTGAGAGGATAGCGGAATTCCTGGTGTAGGAGTGAAATCCGTAGAGATCAGGAGGAACATCAGTGGCGAAGGCGGCT…	Proteobacteria	Deltaproteobacteria	Desulfovibrionales	Desulfovibrionaceae	Gut_cluster_3
ACTCCTACGGGAGGCAGCAGTGGGGAATATTGCACAATGGGGGAAACCCTGATGCAGCGACGCCGCGTGAGTGAAGAAGTATTTCGGTATGTAAAGCTCTATCAGCAGGGAAGAAAATGACGGTACCTGACTAAGAAGCCCCGGCTAACTACGTGCCAGCAGCCGCGGTAATACGTAGGGGGCAAGCGTTATCCGGATTTACTGGGTGTAAAGGGAGCGTAGACGGCATGGTAAGTCTGAAGTGAAAGCCCGGGGCTCAACCCCGTGGACTGCTTTGGAAACTGTCAGGCTAGAGTGCAGGAGAGGTAAGTGGAATTCCTAGTGTAGCGGTGGAATGCGTAGATATTAGGAGGAACACCAGTGGCGAAGGCGGCTTACTGGACTGTAACTGACGTTGAG…	Firmicutes	Clostridia_1	Clostridiales	Lachnospiraceae	Uncultured_13
ACTCCTACGGGAGGCAGCAGTGAGGAATATTGGTCAATGGGCGAGAGCCTGAACCAGCCAAATCGCGTGAAGGAAGACTGCCTTATGGGTTGTAAACTTCTTTTATACAGGAATAAAAAGAGTTACGTGTAACTTATTGCATGTACTGTATGAATAAGCATCGGCTAACTCCGTGCCAGCAGCCGCGGTAATACGGAGGATGCGAGCGTTATCCGGATTTATTGGGTTTAAAGGGTGCGCAGGCGGGAACTTAAGTCAGCGGTGAAATCTCGACGCTTAACGTCGAAACTGCCGTTGAAACTGGGTTTCTTGAGTATAGATGAAGTAGGCGGAATTCGTTGTGTAGCGGTGACATGCTTAGATATAACGAGGAACTCCGATTGCGTAGGCAGCTTACTA…	Bacteroidetes	Bacteroidia	Bacteroidales	Porphyromonadaceae_1	Dysgonomonas
ACTCCTACGGGAGGCAGCAGTGAGGAATATTGGTCAATGGTCGGAAGACTGAACCAGCCAAGTCGCGTGAAGGAAGAAGGATCTATGGTTCGTAAACTTCTTTTATGGGGGAATAAGTATGGGGACGTGTCCCTGTTTATTGCATGTACCCCATGAATAAGCATCGGCTAACTCCGTGCCAGCAGCCGCGGTAATACGGAGGATGCGAGCGTTATCCGGATTTATTGGGTTTAAAGGGTGCGTAGGTGGATGTTTAAGTCCGCGGTGAAAGGTTGTCGCTTAACGATAAAATTGCCGTTGAAACTGGATATCTTGAGTATGTTTGAAGTAGGCGGAATGCGTGGTGTAGCGGTGAAATGCATAGATATCACGCAGAACTCCGATAGCGAAGGCAGCTTA…	Bacteroidetes	Bacteroidia	Bacteroidales	Porphyromonadaceae_3	Tannerella
ACTCCTACGGGAGGCAGCAGTGGGGAATATTGCACAATGGGCGAAAGCCTGATGCAGCAACGCCGCGTGAGTGATGACGGTCTTCGGATTGTAAAGCTCTTTGATTAGGGACGATAATGACGGTACCTAAAGAACAAGCCACGGCTAACTACGTGCCAGCAGCCGCGGTAATACGTAGGTGGCAAGCGTTGTCCGGATTTATTGGGCGTAAAGGGAGCGTAGGCGGACCTTTAAGTCAGATGTGAAATACCCAGGGCTCAACCCGGGTGCTGCATTTGATACTGGAGGTCTAGAGTACAGGAGAGGAGAGTGGAATTCCTAGTGTAGCGGTGAAATGCGTAGAGATTAGGAAGAACACCAGTGGCGAAGGCGACTCTCTGGACTGTAACTGACGCTGAG…	Firmicutes	Clostridia_1	Clostridiales	Clostridiaceae_1	Arthropod_cluster
ACTCCTACGGGAGGCAGCAGTGGGGAATATTGCACAATGGGCGAAAGCCTGATGCAGCAACGCCGCGTGAGTGATGACGGTCTTCGGATTGTAAAGCTCTTTGATTAGGGACGATAATGACGGTACCTAAAGAACAAGCCACGGCTAACTACGTGCCAGCAGCCGCGGTAATACGTAGGTGGCAAGCGTTGTCCGGATTTATTGGGCGTAAAGGGAGCGTAGGCGGACCTTTAAGTCAGATGTGAAATACCCAGGGCTCAACCCGGGTGCTGCATTTGATACTGGAGGTCTAGAGTACAGGAGAGGAGAGTGGAATTCCTAGTGTAGCGGTGAAATGCGTAGAGATTAGGAAGAACACCAGTGGCGAAGGCGACTCTCTGGACTGTAACTGACGCTGAG…	Firmicutes	Clostridia_1	Clostridiales	Clostridiaceae_1	Arthropod_cluster
ACTCCTACGGGAGGCAGCAGTGAGGAATATTCCACAATGGGCGAAAGCCTGATGGAGCAATGCCGCGTGCAGGATGAAGGCCTTCGGGTTGTAAACTGCTTTTATTAGAGAAGAATATGACGGTAACTAATGAATAAGGGTCGGCTAACTACGTGCCAGCAGCCGCGGTCATACGTAGGACCCAAGCGTTATCCGGAGTGACTGGGCGTAAAGAGTTGCGTAGGCGGTTAGATAAGCGAGTGATGAAAACTATCGGCTCAACCGGTAGCCTATTATTCGAACTGTTTAACTCGAGAGTATCAGAGGTCGCTGGAATTCCTTGTGTAGGAGTGAAATCCGTAGATATAAGGAGGAACACCAATGGCGTAGGCAGGCGACTGGGATATTTCTGACGCTAAG…	Patescibacteria	Saccharimonadia	Saccharimonadales	NA	NA
ACTCCTACGGGAGGCAGCAGTGAGGAATATTGGTCAATGGGGGCAACCCTGAACCAGCCATGCCGCGTGCAGGAAGACGGCTCTATGAGTTGTAAACTGCTTTTATACAGGGATAAATCATGATACGTGTATCATGTTGCAGGTACTGTATGAATAAGGATCGGCTAACTCCGTGCCAGCAGCCGCGGTAATACGGAGGATCCAAGCGTTATCCGGATTTATTGGGTTTAAAGGGTGCGTAGGCGGCACGGTAAGTTAGCGGTGAAATCGCGGGGCTCAACCCCGCAACTGCCGTTAAAACTGCCGAGCTAGAGAGTAGATGCGGTAGGCGGAATGTGTAGTGTAGCGGTGAAATGCTTAGAGATTACACAGAACACCGATTGCGAAGGCAGCTTACCA…	Bacteroidetes	Bacteroidia	Bacteroidales	Rikenellaceae	Alistipes_II
ACTCCTACGGGAGGCAGCAGTGGGGGATATTGCACAATGGGCGAAAGCCTGATGCAGCGACGCCGCGTGAGGGAAGAAGGTTTTCGGATTGTAAACCTCTGTCTTCGAGGACGAAGAAGTGACGGTACTCGAGGAGGAAGCCACGGCTAACTACGTGCCAGCAGCCGCGGTAAAACGTAGGTGGCAAGCGTTGTCCGGAATTACTGGGTGTAAAGGGAGCGCAGGCGGGACGATAAGTTGAATGTGAAATGTATGGGCTCAACCCATAGACTGCGTTCAAAACTATCGTTCTTGAGTGATGTAGAGGCAGGCGGAATTCCCGGTGTAGCGGTGGAATGCGTAGATATCGGGAGGAACACCAGTGGCGAAGGCGGCCTGCTGGGCATAAACTGACGCTGA…	Firmicutes	Clostridia_1	Clostridiales	Ruminococcaceae	Termite_cockroach_cluster
ACTCCTACGGGAGGCAGCAGTGGGGGATATTGCACAATGGGCGAAAGCCTGATGCAGCGACGCCGCGTGAGGGAAGAAGGTTTTCGGATTGTAAACCTCTGTCTTCGAGGACGAAGAAGTGACGGTACTCGAGGAGGAAGCCACGGCTAACTACGTGCCAGCAGCCGCGGTAAAACGTAGGTGGCAAGCGTTGTCCGGAATTACTGGGTGTAAAGGGAGCGCAGGCGGGACGATAAGTTGAATGTGAAATGTATGGGCTCAACCCATAGACTGCGTTCAAAACTATCGTTCTTGAGTGATGTAGAGGCAGGCGGAATTCCCGGTGTAGCGGTGGAATGCGTAGATATCGGGAGGAACACCAGTGGCGAAGGCGGCCTGCTGGGCATAAACTGACGCTGA…	Firmicutes	Clostridia_1	Clostridiales	Ruminococcaceae	Termite_cockroach_cluster
ACTCCTACGGGAGGCAGCAGTGAGGAATATTGGTCAATGGACGAGAGTCTGAACCAGCCAAGTAGCGTGAAGGATGACTGCCCTATGGGTTGTAAACTTCTTTTATACGGGAATAAAATGCGGTACGTGTACCGTTTTGTATGTACCGTATGAATAAGGATCGGCTAACTCCGTGCCAGCAGCCGCGGTAATACGGAGGATCCGAGCGTTATCCGGATTTATTGGGTTTAAAGGGAGCGTAGGCGGAAGCTTAAGTCAGTTGTGAAAGTTTGAGGCTCAACCTTAAAATTGCAGTTGAAACTGGGTTTCTTGAGTGCGGCATAGGTGGGCGGAATTCGTGGTGTAGCGGTGAAATGCTTAGATATCACGAAGAACTCCGATTGCGAAGGCAGCTCACTG…	Bacteroidetes	Bacteroidia	Bacteroidales	Porphyromonadaceae_1	Dysgonomonas
ACTCCTACGGGAGGCAGCAGTGGGGAATATTGCACAATGGGGGAAACCCTGATGCAGCAACGCCGCGTGGAGGATGAAGCATTTCGGTGTGTAAACTCCTTTTATTTGGGAAGATAATGACGGTACCAAATGAATAAGCACCGGCTAACTCCGTGCCAGCAGCCGCGGTAATACGGAGGGTGCAAGCGTTACTCGGAATTACTGGGCGTAAAGGGTGCGTAGGCGGGTTATCAAGTCTTGAGTGAAATCCAACAGCTTAACTGTTGAACTGCTTAAGAAACTGGTAGCCTAGAGTGAGGGAGAGGTAGATGGAATTGGTGGTGTAGGGGTAAAATCCATAGATATCACCAGGAATACTCATTGCGAAGGCGATCTACTGGAACTTAACTGACGCTGAGG…	Proteobacteria	Epsilonproteobacteria	Campylobacterales	Campylobacteraceae	Sulfurospirillum
ACTCCTACGGGAGGCAGCAGTGAGGAATATTGGTCAATGGGGGCAACCCTGAACCAGCCATGCCGCGTGCAGGAAGACGGCTCTATGAGTTGTAAACTGCTTTTATACAGGGATAAATCATGATACGTGTATCATGTTGCAGGTACTGTATGAATAAGGATCGGCTAACTCCGTGCCAGCAGCCGCGGTAATACGGAGGATCCAAGCGTTATCCGGATTTATTGGGTTTAAAGGGTGCGTAGGCGGCACGGTAAGTTAGCGGTGAAATCGCGGGGCTCAACCCCGCAACTGCCGTTAAAACTGCCGAGCTAGAGAGTAGATGCGGTAGGCGGAATGTGTAGTGTAGCGGTGAAATGCTTAGAGATTACACAGAACACCGATTGCGAAGGCAGCTTACCA…	Bacteroidetes	Bacteroidia	Bacteroidales	Rikenellaceae	Alistipes_II
ACTCCTACGGGAGGCAGCAGTGGGGAATTTTGGACAATGGGGGCAACCCTGATCCAGCCATGCCGCGTGAGTGAAGAAGGCCTTCGGGTTGTAAAGCTCTTTTGTACGGGAAGAAAAGGTTATTGCTAATATCGATGATACTTGACGGTACCGTAAGAATAAGCACCGGCTAACTACGTGCCAGCAGCCGCGGTAATACGTAGGGTGCAAGCGTTAATCGGAATTACTGGGCGTAAAGCGTGCGCAGGCGGCTTGTTGTGTCTGCTGTGAAATCCCCGGGCTTAACCTGGGAACTGCGGTGGAAACTGGCAAGCTTGAGTGTGGCAGAGGGGGGTGGAATTCCACGTGTAGCAGTGAAATGCGTAGAGATGTGGAGGAACACCGATGGCGAAGGCAGCC…	Proteobacteria	Betaproteobacteria	Rhodocyclales	Rhodocyclaceae_3	Termite_cluster
ACTCCTACGGGAGGCAGCAGTGGGGAATATTGCACAATGGGGGAAACCCTGATGCAGCGACGCCGCGTGAGTGAAGAAGTATTTCGGTATGTAAAGCTCTATCAGCAGGGAAGAAAATGACGGTACCTGACTAAGAAGCCCCGGCTAACTACGTGCCAGCAGCCGCGGTAATACGTAGGGGGCAAGCGTTATCCGGATTTACTGGGTGTAAAGGGAGCGTAGACGGCATGGTAAGTCTGAAGTGAAAGCCCGGGGCTCAACCCCGTGGACTGCTTTGGAAACTGTCAGGCTAGAGTGCAGGAGAGGTAAGTGGAATTCCTAGTGTAGCGGTGGAATGCGTAGATATTAGGAGGAACACCAGTGGCGAAGGCGGCTTACTGGACTGTAACTGACGTTGAG…	Firmicutes	Clostridia	Clostridiales	Lachnospiraceae	NA
ACTCCTACGGGAGGCAGCAGTAGGGAATCTTCGGCAATGGGCGCAAGCCTGACCGAGCAACGCCGCGTGAGTGAAGAAGGTTTTCGGATCGTAAAGCTCTGTTGATAGAGAAGAACGGGTGAGAGAGTGGAAAATTCTTGCTTTGACGGTATCTATCCAGAAAGGGACGGCTAACTACGTGCCAGCAGCCGCGGTAATACGTAGGTCCCGAGCGTTGTCCGGATTTATTGGGCGTAAAGCGAGCGCAGGTGGTTCTTTAAGTCTGATGTAAAAGGCAGTGGCTCAACCATTGTAGGCATTGGAAACTGGGGAACTTGAGTGCAGTAGAGGAGAGTGGAATTCCATGTGTAGCGGTGAAATGCGTAGATATATGGAGGAACACCGGAGGCGAAAGCGGCT…	Firmicutes	Bacilli	Lactobacillales	Streptococcaceae	Lactococcus_3
ACTCCTACGGGAGGCAGCAGTGGGGAATTTTGGACAATGGGGGCAACCCTGATCCAGCCATGCCGCGTGAGTGAAGAAGGCCTTCGGGTTGTAAAGCTCTTTTGTACGGGAAGAAAAGGTTATTGCTAATATCGATGATACTTGACGGTACCGTAAGAATAAGCACCGGCTAACTACGTGCCAGCAGCCGCGGTAATACGTAGGGTGCAAGCGTTAATCGGAATTACTGGGCGTAAAGCGTGCGCAGGCGGCTTGTTGTGTCTGCTGTGAAATCCCCGGGCTTAACCTGGGAACTGCGGTGGAAACTGGCAAGCTTGAGTGTGGCAGAGGGGGGTGGAATTCCACGTGTAGCAGTGAAATGCGTAGAGATGTGGAGGAACACCGATGGCGAAGGCAGCC…	Proteobacteria	Betaproteobacteria	Rhodocyclales	Rhodocyclaceae_3	Termite_cluster
ACTCCTACGGGAGGCAGCAGTGAGGAATATTGGTCAATGGACGCAAGTCTGAACCAGCCATGCCGCGTGCAGGAAGACGGCTCTATGAGTTGTAAACTGCTTTTGTACGAGGGTAAACCCTGATACGTGTATCAGGCTGAAAGTATCGTACGAATAAGGATCGGCTAACTCCGTGCCAGCAGCCGCGGTAATACGGAGGATCCAAGCGTTATCCGGATTTATTGGGTTTAAAGGGTGCGTAGGCGGTTTGTTAAGTTAGAGGTGAAATTCCGTGGCTCAACCACGGCACTGCCTCTGATACTGGCAGGCTAGAGAATGGTTGCTGTGGGCGGAATGTGTGGTGTAGCGGTGAAATGCTTAGAGATCACACAGAACACCGATTGCGAAGGCAGCTCACAA…	Bacteroidetes	Bacteroidia	Bacteroidales	Rikenellaceae	Alisitpes_IV
ACTCCTACGGGAGGCAGCAGTGAGGAATATTCCACAATGGGCGAAAGCCTGATGGAGCAATGCCGCGTGCAGGATGAAGGCCTTCGGGTTGTAAACTGCTTTTATTAGAGAAGAATATGACGGTAACTAATGAATAAGGGTCGGCTAACTACGTGCCAGCAGCCGCGGTCATACGTAGGACCCAAGCGTTATCCGGAGTGACTGGGCGTAAAGAGTTGCGTAGGCGGTTAGATAAGCGAGTGATGAAAACTATCGGCTCAACCGGTAGCCTATTATTCGAACTGTTTAACTCGAGAGTATCAGAGGTCGCTGGAATTCCTTGTGTAGGAGTGAAATCCGTAGATATAAGGAGGAACACCAATGGCGTAGGCAGGCGACTGGGATATTTCTGACGCTAAG…	Patescibacteria	Saccharimonadia	Saccharimonadales	NA	NA
ACTCCTACGGGAGGCAGCAGTGAGGAATATTGGTCAATGGTCGGAAGACTGAACCAGCCAAGTCGCGTGAAGGAAGAAGGATCTATGGTTCGTAAACTTCTTTTATGGGGGAATAAGTATGGGGACGTGTCCCTGTTTATTGCATGTACCCCATGAATAAGCATCGGCTAACTCCGTGCCAGCAGCCGCGGTAATACGGAGGATGCGAGCGTTATCCGGATTTATTGGGTTTAAAGGGTGCGTAGGTGGATGTTTAAGTCCGCGGTGAAAGGTTGTCGCTTAACGATAAAATTGCCGTTGAAACTGGATATCTTGAGTATGTTTGAAGTAGGCGGAATGCGTGGTGTAGCGGTGAAATGCATAGATATCACGCAGAACTCCGATAGCGAAGGCAGCTTA…	Bacteroidetes	Bacteroidia	Bacteroidales	Porphyromonadaceae_3	Tannerella
ACTCCTACGGGAGGCAGCAGTGAGGAATATTGGTCAATGGACGAGAGTCTGAACCAGCCAAGTAGCGTGAAGGATGACTGCCCTATGGGTTGTAAACTTCTTTTATACGGGAATAAAATGCGGTACGTGTACCGTTTTGTATGTACCGTATGAATAAGGATCGGCTAACTCCGTGCCAGCAGCCGCGGTAATACGGAGGATCCGAGCGTTATCCGGATTTATTGGGTTTAAAGGGAGCGTAGGCGGAAGCTTAAGTCAGTTGTGAAAGTTTGAGGCTCAACCTTAAAATTGCAGTTGAAACTGGGTTTCTTGAGTGCGGCATAGGTGGGCGGAATTCGTGGTGTAGCGGTGAAATGCTTAGATATCACGAAGAACTCCGATTGCGAAGGCAGCTCACTG…	Bacteroidetes	Bacteroidia	Bacteroidales	Porphyromonadaceae_1	Dysgonomonas
ACTCCTACGGGAGGCAGCAGTGGGGAATTTTGGACAATGGGGGCAACCCTGATCCAGCCATGCCGCGTGAGTGAAGAAGGCCTTCGGGTTGTAAAGCTCTTTTGTACGGGAAGAAAAGGTTATTGCTAATATCGATGATACTTGACGGTACCGTAAGAATAAGCACCGGCTAACTACGTGCCAGCAGCCGCGGTAATACGTAGGGTGCAAGCGTTAATCGGAATTACTGGGCGTAAAGCGTGCGCAGGCGGCTTGTTGTGTCTGCTGTGAAATCCCCGGGCTTAACCTGGGAACTGCGGTGGAAACTGGCAAGCTTGAGTGTGGCAGAGGGGGGTGGAATTCCACGTGTAGCAGTGAAATGCGTAGAGATGTGGAGGAACACCGATGGCGAAGGCAGCC…	Proteobacteria	Betaproteobacteria	Rhodocyclales	Rhodocyclaceae_3	Termite_cluster
ACTCCTACGGGAGGCAGCAGTGGGGGATATTGCACAATGGGCGAAAGCCTGATGCAGCGACGCCGCGTGAGGGAAGAAGGTTTTCGGATTGTAAACCTCTGTCTTCGAGGACGAAGAAGTGACGGTACTCGAGGAGGAAGCCACGGCTAACTACGTGCCAGCAGCCGCGGTAAAACGTAGGTGGCAAGCGTTGTCCGGAATTACTGGGTGTAAAGGGAGCGCAGGCGGGACGATAAGTTGAATGTGAAATGTATGGGCTCAACCCATAGACTGCGTTCAAAACTATCGTTCTTGAGTGATGTAGAGGCAGGCGGAATTCCCGGTGTAGCGGTGGAATGCGTAGATATCGGGAGGAACACCAGTGGCGAAGGCGGCCTGCTGGGCATAAACTGACGCTGA…	Firmicutes	Clostridia_1	Clostridiales	Ruminococcaceae	Termite_cockroach_cluster
ACTCCTACGGGAGGCAGCAGTGGGGAATATTGCACAATGGACGGAAGTCTGATGCAGCAACGCCGCGTGGAGGATGACACATTTCGGTGCGTAAACTCCTTTTATGTAAGAAGATAATGACGGTATTATATGAATAAGCACCGGCTAACTCCGTGCCAGCAGCCGCGGTAATACGGGGGGTGCAAGCGTTACTCGGAATCACTGGGCGTAAAGAGCGTGTAGGCGGATTGATAAGTTTGAAGTGAAATCCTATAGCTTAACTATAGAATTGCTTTGAAAACTGTTAGTCTAGAATGTGGGAGAGGTAGATGGAATTTCTGGTGTAGGGGTAAAATCCGTAGAGATCAGAAGGAATACCGATTGCGAAGGCGATCTACTGGAACAATATTGACGCTGAGA…	Proteobacteria	Epsilonproteobacteria	Campylobacterales	Campylobacteraceae	Arcobacter
ACTCCTACGGGAGGCAGCAGTGAGGAATATTGGTCAATGGACGAGAGTCTGAACCAGCCAAGTAGCGTGAAGGATGACTGCCCTATGGGTTGTAAACTTCTTTTATACGGGAATAAAATGCGGTACGTGTACCGTTTTGTATGTACCGTATGAATAAGGATCGGCTAACTCCGTGCCAGCAGCCGCGGTAATACGGAGGATCCGAGCGTTATCCGGATTTATTGGGTTTAAAGGGAGCGTAGGCGGAAGCTTAAGTCAGTTGTGAAAGTTTGAGGCTCAACCTTAAAATTGCAGTTGAAACTGGGTTTCTTGAGTGCGGCATAGGTGGGCGGAATTCGTGGTGTAGCGGTGAAATGCTTAGATATCACGAAGAACTCCGATTGCGAAGGCAGCTCACTG…	Bacteroidetes	Bacteroidia	Bacteroidales	Porphyromonadaceae_1	Dysgonomonas
ACTCCTACGGGAGGCAGCAGTGGGGAATATTGGGCAATGGGCGAAAGCCTGACCCAGCAACGCCGCGTGAGGGAAGAAGGTTTTCGGATCGTAAACCTCTGTCGCAAGGGACGAGTAGAAGACGGTACCTTGCAAGGAAGCTCCGGCTAACTACGTGCCAGCAGCCGCGGTAATACGTAGGGAGCGAGCGTTGTCCGGAATGACTGGGCGTAAAGGGCGCGTAGGTGGCCCTATAAGTTAGGAGTGAAAGTCCCGCTTTCAAGGTGGGAATTGCTTTTAATACTGTAGGGCTTGAGTGTGGGAGAGGATAGCGGAATTCCCGGTGTAGCGGTGAAATGCGTAGAGATCGGGAGGAACACCAGTGGCGAAGGCGGCTATCTGGACCAAGACTGACACTGA…	Firmicutes	Clostridia_1	Clostridiales	Lachnospiraceae	Gut_cluster_13
ACTCCTACGGGAGGCAGCAGTGAGGAATCTTCCACAATGGGCGAAAGCCTGATGGAGCAATGCCGCGTGCAGGATGAAGGCCTTCGGGTTGTAAACTGCTTTTATTAGAGAAGAATATGACGGTAACTAATGAATAAGGGTCGGCTAACTACGTGCCAGCAGCCGCGGTCATACGTAGGACCCAAGCGTTATCCGGAGTGACTGGGCGTAAAGAGTTGCGTAGGCGGCGTGCTAAGCGAGTAGTGAAAATTATCGGCTCAACCGATAACCTATTATTCGAACTGGCATGCTCGAGAATAGTAGAGGTAGCTGGAATTACTAGTGTAGGAGTGGAATCCGTAGATATTAGTAGGAACACCAATGGCGTAGGCAGGCTACTGGACTATTTCTGACGCTAAG…	Patescibacteria	Saccharimonadia	Saccharimonadales	NA	NA
ACTCCTACGGGAGGCAGCAGTGGGGAATATTGGACAATGGGCGAAAGCCTGATCCAGCAATGCCGCGTGAGTGATGAAGGCCTTAGGGTTGTAAAGCTCTTTTACCCGGGATGATAATGACAGTACCGGGAGAATAAGCTCCGGCTAACTCCGTGCCAGCAGCCGCGGTAATACGGAGGGAGCTAGCGTTATTCGGAATTACTGGGCGTAAAGCGCACGTAGGCGGCTTTGTAAGTTAGAGGTGAAAGCCTGGAGCTCAACTCCAGAATTGCCTTTAAGACTGCATCGCTTGAATCCAGGAGAGGTGAGTGGAATTCCGAGTGTAGAGGTGAAATTCGTAGATATTCGGAAGAACACCAGTGGCGAAGGCGGCTCACTGGACTGGTATTGACGCTGAGG…	Proteobacteria	Alphaproteobacteria	Sphingomonadales	Sphingomonadaceae	Sphingomonas
ACTCCTACGGGAGGCAGCAGTGAGGAATATTCCACAATGGGCGAAAGCCTGATGGAGCAATGCCGCGTGCAGGATGAAGGCCTTCGGGTTGTAAACTGCTTTTATTAGAGAAGAATATGACGGTAACTAATGAATAAGGGTCGGCTAACTACGTGCCAGCAGCCGCGGTCATACGTAGGACCCAAGCGTTATCCGGAGTGACTGGGCGTAAAGAGTTGCGTAGGCGGTTAGATAAGCGAGTGATGAAAACTATCGGCTCAACCGGTAGCCTATTATTCGAACTGTTTAACTCGAGAGTATCAGAGGTCGCTGGAATTCCTTGTGTAGGAGTGAAATCCGTAGATATAAGGAGGAACACCAATGGCGTAGGCAGGCGACTGGGATATTTCTGACGCTAAG…	Patescibacteria	Saccharimonadia	Saccharimonadales	NA	NA
ACTCCTACGGGAGGCAGCAGTGGGGAATTTTGGACAATGGGGGCAACCCTGATCCAGCCATGCCGCGTGAGTGAAGAAGGCCTTCGGGTTGTAAAGCTCTTTTGTACGGGAAGAAAAGGTTATTGCTAATATCGATGATACTTGACGGTACCGTAAGAATAAGCACCGGCTAACTACGTGCCAGCAGCCGCGGTAATACGTAGGGTGCAAGCGTTAATCGGAATTACTGGGCGTAAAGCGTGCGCAGGCGGCTTGTTGTGTCTGCTGTGAAATCCCCGGGCTTAACCTGGGAACTGCGGTGGAAACTGGCAAGCTTGAGTGTGGCAGAGGGGGGTGGAATTCCACGTGTAGCAGTGAAATGCGTAGAGATGTGGAGGAACACCGATGGCGAAGGCAGCC…	Proteobacteria	Betaproteobacteria	Rhodocyclales	Rhodocyclaceae_3	Termite_cluster
ACTCCTACGGGAGGCAGCAGTGAGGAATATTGGTCAATGGACGCAAGTCTGAACCAGCCATGCCGCGTGCAGGAAGACGGCTCTATGAGTTGTAAACTGCTTTTGTGCGAGGGTAAACCCCCTTACGTGTAAGGGGCTGAAAGTATCGTACGAATAAGGATCGGCTAACTCCGTGCCAGCAGCCGCGGTAATACGGAGGATCCAAGCGTTATCCGGATTTATTGGGTTTAAAGGGTGCGTAGGCGGTTTGTTAAGTTAGAGGTGAAATCCCGTGGCTCAACCACGGAACTGCCTCTGATACTGGCAGGCTAGAGAATGGTTGCTGTGGGCGGAATGTGTGGTGTAGCGGTGAAATGCTTAGAGATCACACAGAACACCGATTGCGAAGGCAGCTCACAA…	Bacteroidetes	Bacteroidia	Bacteroidales	Rikenellaceae	Alisitpes_IV
ACTCCTACGGGAGGCAGCAGTGGGGGATATTGCACAATGGGCGAAAGCCTGATGCAGCGACGCCGCGTGAGGGAAGAAGGTTTTCGGATTGTAAACCTCTGTCTTCGAGGACGAAGAAGTGACGGTACTCGAGGAGGAAGCCACGGCTAACTACGTGCCAGCAGCCGCGGTAAAACGTAGGTGGCAAGCGTTGTCCGGAATTACTGGGTGTAAAGGGAGCGCAGGCGGGACGATAAGTTGAATGTGAAATGTATGGGCTCAACCCATAGACTGCGTTCAAAACTATCGTTCTTGAGTGATGTAGAGGCAGGCGGAATTCCCGGTGTAGCGGTGGAATGCGTAGATATCGGGAGGAACACCAGTGGCGAAGGCGGCCTGCTGGGCATAAACTGACGCTGA…	Firmicutes	Clostridia_1	Clostridiales	Ruminococcaceae	Termite_cockroach_cluster
ACTCCTACGGGAGGCAGCAGTGGGGAATATTGCGCAATGGGCGAAAGCCTGACGCAGCGACGCCGCGTGAGGGATGAAGGCCTTCGGGTCGTAAACCTCTGTCAGGAGGGAAGAAGTGCGAACGTGCTAATCAGCGTTCGTTTGACGGTACCTCCAAAGGAAGCACCGGCTAACTCCGTGCCAGCAGCCGCGGTAATACGGAGGGTGCAAGCGTTAATCGGAATCACTGGGCGTAAAGCGCGCGTAGGCGGCTTGTTAAGTCAGGGGTGAAATCCCACGGCCCACCCGTGGAACTGCCCTTGATACTGTCAGGCTAGAGTGTGTGAGAGGATAGCGGAATTCCTGGTGTAGGAGTGAAATCCGTAGAGATCAGGAGGAACATCAGTGGCGAAGGCGGCT…	Proteobacteria	Deltaproteobacteria	Desulfovibrionales	Desulfovibrionaceae	Gut_cluster_3
ACTCCTACGGGAGGCAGCAGTAAGGAATATTGGGCAATGGACGCAAGTCTGACCCAGCCATGCCGCGTGAAGGAAGACAGCCCTATGGGTTGTAAACTTCTTTTAACAGAGGATAAAGTCGCGTATGTATACGCGTTTGCAGGTATCTGTTGAATAAGCATCGGCTAACTCCGTGCCAGCAGCCGCGGTAATACGGAGGATGCAAGCGTTATCCGGATTCATTGGGTTTAAAGGGTGCGCAGGCGGACTTTTAAGTCAGCGGTGAAATTCCACGGCTCAACCGTGGCGCTGCCGTTGATACTGGGAGTCTTGAGTGTGATTGAGGTGGGCGGAATGTAGCGTGTAGCGGTGAAATGCATAGATATGCTACAGAACACCAATTGCGAAGGCAGCTCACCA…	Bacteroidetes	Sphingobacteria	Sphingobacteriales_1	SB_1	Termite_cluster
ACTCCTACGGGAGGCAGCAGTGAGGAATATTGGTCAATGGACGCAAGTCTGAACCAGCCATGCCGCGTGCAGGAAGACGGCTCTATGAGTTGTAAACTGCTTTTGTACGAGGGTAAACCCAGATACGTGTATCTGGCTGAAAGTATCGTACGAATAAGGATCGGCTAACTCCGTGCCAGCAGCCGCGGTAATACGGAGGATCCAAGCGTTATCCGGATTTATTGGGTTTAAAGGGTGCGTAGGCGGTTTGTTAAGTTAGAGGTGAAATCCCGTGGCTCAACCACGGAACTGCCTCTGATACTGGCAGGCTAGAGAATGGTTGCTGTGGGCGGAATGTGTGGTGTAGCGGTGAAATGCTTAGAGATCACACAGAACACCGATTGCGAAGGCAGCTCACAA…	Bacteroidetes	Bacteroidia	Bacteroidales	Rikenellaceae	Alisitpes_IV
ACTCCTACGGGAGGCAGCAGTGAGGAATATTGGTCAATGGACGCAAGTCTGAACCAGCCATGCCGCGTGCAGGAAGACGGCTCTATGAGTTGTAAACTGCTTTTGTGCGAGGGTAAACCCCCTTACGTGTAAGGGGCTGAAAGTATCGTACGAATAAGGATCGGCTAACTCCGTGCCAGCAGCCGCGGTAATACGGAGGATCCAAGCGTTATCCGGATTTATTGGGTTTAAAGGGTGCGTAGGCGGTTTGTTAAGTTAGAGGTGAAATCCCGTGGCTCAACCACGGAACTGCCTCTGATACTGGCAGGCTAGAGAATGGTTGCTGTGGGCGGAATGTGTGGTGTAGCGGTGAAATGCTTAGAGATCACACAGAACACCGATTGCGAAGGCAGCTCACAA…	Bacteroidetes	Bacteroidia	Bacteroidales	Rikenellaceae	Alisitpes_IV
ACTCCTACGGGAGGCAGCAGTGAGGAATATTGGTCAATGGTCGGAAGACTGAACCAGCCAAGTCGCGTGAAGGAAGAAGGATCTATGGTTCGTAAACTTCTTTTATGGGGGAATAAGTATGGGGACGTGTCCCTGTTTATTGCATGTACCCCATGAATAAGCATCGGCTAACTCCGTGCCAGCAGCCGCGGTAATACGGAGGATGCGAGCGTTATCCGGATTTATTGGGTTTAAAGGGTGCGTAGGTGGATGTTTAAGTCCGCGGTGAAAGGTTGTCGCTTAACGATAAAATTGCCGTTGAAACTGGATATCTTGAGTATGTTTGAAGTAGGCGGAATGCGTGGTGTAGCGGTGAAATGCATAGATATCACGCAGAACTCCGATAGCGAAGGCAGCTTA…	Bacteroidetes	Bacteroidia	Bacteroidales	Porphyromonadaceae_3	Tannerella
ACTCCTACGGGAGGCAGCAGTGAGGAATATTGGTCAATGGACGCAAGTCTGAACCAGCCATGCCGCGTGCAGGAAGACGGCTCTATGAGTTGTAAACTGCTTTTGTGCGAGGGTAAACCCCCTTACGTGTAAGGGGCTGAAAGTATCGTACGAATAAGGATCGGCTAACTCCGTGCCAGCAGCCGCGGTAATACGGAGGATCCAAGCGTTATCCGGATTTATTGGGTTTAAAGGGTGCGTAGGCGGTTTGTTAAGTTAGAGGTGAAATCCCGTGGCTCAACCACGGAACTGCCTCTGATACTGGCAGGCTAGAGAATGGTTGCTGTGGGCGGAATGTGTGGTGTAGCGGTGAAATGCTTAGAGATCACACAGAACACCGATTGCGAAGGCAGCTCACAA…	Bacteroidetes	Bacteroidia	Bacteroidales	Rikenellaceae	Alisitpes_IV
ACTCCTACGGGAGGCAGCAGTGAGGAATATTGGTCAATGGTCGGAAGACTGAACCAGCCAAGTCGCGTGAAGGAAGAAGGATCTATGGTTCGTAAACTTCTTTTATGGGGGAATAAGTATGGGGACGTGTCCCTGTTTATTGCATGTACCCCATGAATAAGCATCGGCTAACTCCGTGCCAGCAGCCGCGGTAATACGGAGGATGCGAGCGTTATCCGGATTTATTGGGTTTAAAGGGTGCGTAGGTGGATGTTTAAGTCCGCGGTGAAAGGTTGTCGCTTAACGATAAAATTGCCGTTGAAACTGGATATCTTGAGTATGTTTGAAGTAGGCGGAATGCGTGGTGTAGCGGTGAAATGCATAGATATCACGCAGAACTCCGATAGCGAAGGCAGCTTA…	Bacteroidetes	Bacteroidia	Bacteroidales	Porphyromonadaceae_3	Tannerella
ACTCCTACGGGAGGCAGCAGTGGGGAATATTGGACAATGGGCGAAAGCCTGATCCAGCAATGCCGCGTGAGTGATGAAGGCCTTAGGGTTGTAAAGCTCTTTTACCCGGGATGATAATGACAGTACCGGGAGAATAAGCTCCGGCTAACTCCGTGCCAGCAGCCGCGGTAATACGGAGGGAGCTAGCGTTATTCGGAATTACTGGGCGTAAAGCGCACGTAGGCGGCTTTGTAAGTTAGAGGTGAAAGCCTGGAGCTCAACTCCAGAATTGCCTTTAAGACTGCATCGCTTGAATCCAGGAGAGGTGAGTGGAATTCCGAGTGTAGAGGTGAAATTCGTAGATATTCGGAAGAACACCAGTGGCGAAGGCGGCTCACTGGACTGGTATTGACGCTGAGG…	Proteobacteria	Alphaproteobacteria	Sphingomonadales	Sphingomonadaceae	Sphingomonas
ACTCCTACGGGAGGCAGCAGTGGGGGATATTGCACAATGGGCGAAAGCCTGATGCAGCGACGCCGCGTGAGGGAAGAAGGTTTTCGGATTGTAAACCTCTGTCTTCGAGGACGAAGAAGTGACGGTACTCGAGGAGGAAGCCACGGCTAACTACGTGCCAGCAGCCGCGGTAAAACGTAGGTGGCAAGCGTTGTCCGGAATTACTGGGTGTAAAGGGAGCGCAGGCGGGACGATAAGTTGAATGTGAAATGTATGGGCTCAACCCATAGACTGCGTTCAAAACTATCGTTCTTGAGTGATGTAGAGGCAGGCGGAATTCCCGGTGTAGCGGTGGAATGCGTAGATATCGGGAGGAACACCAGTGGCGAAGGCGGCCTGCTGGGCATAAACTGACGCTGA…	Firmicutes	Clostridia_1	Clostridiales	Ruminococcaceae	Termite_cockroach_cluster
ACTCCTACGGGAGGCAGCAGTGAGGAATATTGGTCAATGGGGGCAACCCTGAACCAGCCATGCCGCGTGCAGGAAGACGGCTCTATGAGTTGTAAACTGCTTTTATACAGGGATAAATCATGATACGTGTATCATGTTGCAGGTACTGTATGAATAAGGATCGGCTAACTCCGTGCCAGCAGCCGCGGTAATACGGAGGATCCAAGCGTTATCCGGATTTATTGGGTTTAAAGGGTGCGTAGGCGGCACGGTAAGTTAGCGGTGAAATCGCGGGGCTCAACCCCGCAACTGCCGTTAAAACTGCCGAGCTAGAGAGTAGATGCGGTAGGCGGAATGTGTAGTGTAGCGGTGAAATGCTTAGAGATTACACAGAACACCGATTGCGAAGGCAGCTTACCA…	Bacteroidetes	Bacteroidia	Bacteroidales	Rikenellaceae	Alistipes_II
ACTCCTACGGGAGGCAGCAGTGGGGAATATTGCACAATGGGGGAAACCCTGATGCAGCGACGCCGCGTGAGTGAAGAAGTATTTCGGTATGTAAAGCTCTATCAGCAGGGAAGAAAATGACGGTACCTGACTAAGAAGCCCCGGCTAACTACGTGCCAGCAGCCGCGGTAATACGTAGGGGGCAAGCGTTATCCGGATTTACTGGGTGTAAAGGGAGCGTAGACGGCATGGTAAGTCTGAAGTGAAAGCCCGGGGCTCAACCCCGTGGACTGCTTTGGAAACTGTCAGGCTAGAGTGCAGGAGAGGTAAGTGGAATTCCTAGTGTAGCGGTGGAATGCGTAGATATTAGGAGGAACACCAGTGGCGAAGGCGGCTTACTGGACTGTAACTGACGTTGAG…	Firmicutes	Clostridia_1	Clostridiales	Lachnospiraceae	Uncultured_13
ACTCCTACGGGAGGCAGCAGTGGGGGATATTGCACAATGGGCGAAAGCCTGATGCAGCGACGCCGCGTGAGGGAAGAAGGTTTTCGGATTGTAAACCTCTGTCTTCGAGGACGAAGAAGTGACGGTACTCGAGGAGGAAGCCACGGCTAACTACGTGCCAGCAGCCGCGGTAAAACGTAGGTGGCAAGCGTTGTCCGGAATTACTGGGTGTAAAGGGAGCGCAGGCGGGACGATAAGTTGAATGTGAAATGTATGGGCTCAACCCATAGACTGCGTTCAAAACTATCGTTCTTGAGTGATGTAGAGGCAGGCGGAATTCCCGGTGTAGCGGTGGAATGCGTAGATATCGGGAGGAACACCAGTGGCGAAGGCGGCCTGCTGGGCATAAACTGACGCTGA…	Firmicutes	Clostridia_1	Clostridiales	Ruminococcaceae	Termite_cockroach_cluster
ACTCCTACGGGAGGCAGCAGTGGGGAATATTGCACAATGGGGGAAACCCTGATGCAGCAACGCCGCGTGGAGGATGAAGCATTTCGGTGTGTAAACTCCTTTTATTTGGGAAGATAATGACGGTACCAAATGAATAAGCACCGGCTAACTCCGTGCCAGCAGCCGCGGTAATACGGAGGGTGCAAGCGTTACTCGGAATTACTGGGCGTAAAGGGTGCGTAGGCGGGTTATCAAGTCTTGAGTGAAATCCAACAGCTTAACTGTTGAACTGCTTAAGAAACTGGTAGCCTAGAGTGAGGGAGAGGTAGATGGAATTGGTGGTGTAGGGGTAAAATCCATAGATATCACCAGGAATACTCATTGCGAAGGCGATCTACTGGAACTTAACTGACGCTGAGG…	Proteobacteria	Epsilonproteobacteria	Campylobacterales	Campylobacteraceae	Sulfurospirillum
ACTCCTACGGGAGGCAGCAGTGAGGAATATTGGTCAATGGGGGCAACCCTGAACCAGCCATGCCGCGTGCAGGAAGACGGCTCTATGAGTTGTAAACTGCTTTTATACAGGGATAAATCCATGTACGTGTACGTGGTTGAAGGTACTGTATGAATAAGGATCGGCTAACTCCGTGCCAGCAGCCGCGGTAATACGGAGGATCCAAGCGTTATCCGGATTTATTGGGTTTAAAGGGTGCGTAGGCGGTTTGTTAAGTTAGAGGTGAAATCCGGTGGCTCAACCACCGAACTGCCTCTGATACTGGCAGGCTAGAGATTAGATGCGGTAGGCGGAATGTGTAGTGTAGCGGTGAAATGCTTAGAGATTACACAGAACACCGATTGCGAAGGCAGCTTACCA…	Bacteroidetes	Bacteroidia	Bacteroidales	Rikenellaceae	Alistipes_II
ACTCCTACGGGAGGCAGCAGTGGGGAATATTGGACAATGGGCGAAAGCCTGATCCAGCAATGCCGCGTGAGTGATGAAGGCCTTAGGGTTGTAAAGCTCTTTTACCCGGGATGATAATGACAGTACCGGGAGAATAAGCTCCGGCTAACTCCGTGCCAGCAGCCGCGGTAATACGGAGGGAGCTAGCGTTATTCGGAATTACTGGGCGTAAAGCGCACGTAGGCGGCTTTGTAAGTTAGAGGTGAAAGCCTGGAGCTCAACTCCAGAATTGCCTTTAAGACTGCATCGCTTGAATCCAGGAGAGGTGAGTGGAATTCCGAGTGTAGAGGTGAAATTCGTAGATATTCGGAAGAACACCAGTGGCGAAGGCGGCTCACTGGACTGGTATTGACGCTGAGG…	Proteobacteria	Alphaproteobacteria	Sphingomonadales	Sphingomonadaceae	Sphingomonas
ACTCCTACGGGAGGCAGCAGTGGGGAATATTGCACAATGGACGGAAGTCTGATGCAGCAACGCCGCGTGGAGGATGACACATTTCGGTGCGTAAACTCCTTTTATGTAAGAAGATAATGACGGTATTATATGAATAAGCACCGGCTAACTCCGTGCCAGCAGCCGCGGTAATACGGGGGGTGCAAGCGTTACTCGGAATCACTGGGCGTAAAGAGCGTGTAGGCGGATTGATAAGTTTGAAGTGAAATCCTATAGCTTAACTATAGAACTGCTTTGAAAACTGTTAGTCTAGAATGTGGGAGAGGTAGATGGAATTTCTGGTGTAGGGGTAAAATCCGTAGAGATCAGAAGGAATACCGATTGCGAAGGCGATCTACTGGAACAATATTGACGCTGAGA…	Proteobacteria	Epsilonproteobacteria	Campylobacterales	Campylobacteraceae	Arcobacter
ACTCCTACGGGAGGCAGCAGTGGGGGATATTGCACAATGGGCGAAAGCCTGATGCAGCGACGCCGCGTGAGGGAAGAAGGTTTTCGGATTGTAAACCTCTGTCTTCGAGGACGAAGAAGTGACGGTACTCGAGGAGGAAGCCACGGCTAACTACGTGCCAGCAGCCGCGGTAAAACGTAGGTGGCAAGCGTTGTCCGGAATTACTGGGTGTAAAGGGAGCGCAGGCGGGACGATAAGTTGAATGTGAAATGTATGGGCTCAACCCATAGACTGCGTTCAAAACTATCGTTCTTGAGTGATGTAGAGGCAGGCGGAATTCCCGGTGTAGCGGTGGAATGCGTAGATATCGGGAGGAACACCAGTGGCGAAGGCGGCCTGCTGGGCATAAACTGACGCTGA…	Firmicutes	Clostridia_1	Clostridiales	Ruminococcaceae	Termite_cockroach_cluster
ACTCCTACGGGAGGCAGCAGTGGGGAATATTGCACAATGGGGGAAACCCTGATGCAGCAACGCCGCGTGGAGGATGACGCATTTCGGTGTGTAAACTCCTTTTATTTGGGAAGATAATGACGGTACCAAATGAATAAGCACCGGCTAACTCCGTGCCAGCAGCCGCGGTAATACGGAGGGTGCAAGCGTTACTCGGAATCACTGGGCGTAAAGGGTGCGTAGGCGGGTTATCAAGTCTTAAGTGAAATCCAACAGCTTAACTGTTGAACTGCTTAGGAAACTGGCAACCTAGAGTAAGGGAGAGGTAGATGGAATTGGTGGTGTAGGGGTAAAATCCGTAGATATCACCAGGAATACTCATTGCGAAGGCGATCTACTGGAACTTAACTGACGCTGAGG…	Proteobacteria	Epsilonproteobacteria	Campylobacterales	Campylobacteraceae	Sulfurospirillum
ACTCCTACGGGAGGCAGCAGTGAGGAATATTGGTCAATGGTCGGAAGACTGAACCAGCCAAGTCGCGTGAAGGAAGAAGGATCTATGGTTCGTAAACTTCTTTTATGGGGGAATAAGTATGGGGACGTGTCCCTGTTTATTGCATGTACCCCATGAATAAGCATCGGCTAACTCCGTGCCAGCAGCCGCGGTAATACGGAGGATGCGAGCGTTATCCGGATTTATTGGGTTTAAAGGGTGCGTAGGTGGATGTTTAAGTCCGCGGTGAAAGGTTGTCGCTTAACGATAAAATTGCCGTTGAAACTGGATATCTTGAGTATGTTTGAAGTAGGCGGAATGCGTGGTGTAGCGGTGAAATGCATAGATATCACGCAGAACTCCGATAGCGAAGGCAGCTTA…	Bacteroidetes	Bacteroidia	Bacteroidales	Porphyromonadaceae_3	Tannerella
ACTCCTACGGGAGGCAGCAGTGAGGAATATTGGTCAATGGACGCAAGTCTGAACCAGCCATGCCGCGTGCAGGAAGACGGCTCTATGAGTTGTAAACTGCTTTTGTGCGAGGGTAAACCCCCTTACGTGTAAGGGGCTGAAAGTATCGTACGAATAAGGATCGGCTAACTCCGTGCCAGCAGCCGCGGTAATACGGAGGATCCAAGCGTTATCCGGATTTATTGGGTTTAAAGGGTGCGTAGGCGGTTTGTTAAGTTAGAGGTGAAATCCCGTGGCTCAACCACGGAACTGCCTCTGATACTGGCAGGCTAGAGAATGGTTGCTGTGGGCGGAATGTGTGGTGTAGCGGTGAAATGCTTAGAGATCACACAGAACACCGATTGCGAAGGCAGCTCACAA…	Bacteroidetes	Bacteroidia	Bacteroidales	Rikenellaceae	Alisitpes_IV
ACTCCTACGGGAGGCAGCAGTGAGGAATATTGGTCAATGGTCGGAAGACTGAACCAGCCAAGTCGCGTGAAGGAAGAAGGATCTATGGTTCGTAAACTTCTTTTATGGGGGAATAAGTATGGGGACGTGTCCCTGTTTATTGCATGTACCCCATGAATAAGCATCGGCTAACTCCGTGCCAGCAGCCGCGGTAATACGGAGGATGCGAGCGTTATCCGGATTTATTGGGTTTAAAGGGTGCGTAGGTGGATGTTTAAGTCCGCGGTGAAAGGTTGTCGCTTAACGATAAAATTGCCGTTGAAACTGGATATCTTGAGTATGTTTGAAGTAGGCGGAATGCGTGGTGTAGCGGTGAAATGCATAGATATCACGCAGAACTCCGATAGCGAAGGCAGCTTA…	Bacteroidetes	Bacteroidia	Bacteroidales	Porphyromonadaceae_3	Tannerella
ACTCCTACGGGAGGCAGCAGTGAGGAATATTGGTCAATGGTCGGAAGACTGAACCAGCCAAGTCGCGTGAAGGAAGAAGGATCTATGGTTCGTAAACTTCTTTTATGGGGGAATAAGTATGGGGACGTGTCCCTGTTTATTGCATGTACCCCATGAATAAGCATCGGCTAACTCCGTGCCAGCAGCCGCGGTAATACGGAGGATGCGAGCGTTATCCGGATTTATTGGGTTTAAAGGGTGCGTAGGTGGATGTTTAAGTCCGCGGTGAAAGGTTGTCGCTTAACGATAAAATTGCCGTTGAAACTGGATATCTTGAGTATGTTTGAAGTAGGCGGAATGCGTGGTGTAGCGGTGAAATGCATAGATATCACGCAGAACTCCGATAGCGAAGGCAGCTTA…	Bacteroidetes	Bacteroidia	Bacteroidales	Porphyromonadaceae_3	Tannerella
ACTCCTACGGGAGGCAGCAGTGAGGAATATTGGTCAATGGACGAGAGTCTGAACCAGCCAAGTAGCGTGAAGGATGACTGCCCTATGGGTTGTAAACTTCTTTTATACGGGAATAAAATGCGGTACGTGTACCGTTTTGTATGTACCGTATGAATAAGGATCGGCTAACTCCGTGCCAGCAGCCGCGGTAATACGGAGGATCCGAGCGTTATCCGGATTTATTGGGTTTAAAGGGAGCGTAGGCGGAAGCTTAAGTCAGTTGTGAAAGTTTGAGGCTCAACCTTAAAATTGCAGTTGAAACTGGGTTTCTTGAGTGCGGCATAGGTGGGCGGAATTCGTGGTGTAGCGGTGAAATGCTTAGATATCACGAAGAACTCCGATTGCGAAGGCAGCTCACTG…	Bacteroidetes	Bacteroidia	Bacteroidales	Porphyromonadaceae_1	Dysgonomonas
ACTCCTACGGGAGGCAGCAGTGAGGAATATTCCACAATGGGCGAAAGCCTGATGGAGCAATGCCGCGTGCAGGATGAAGGCCTTCGGGTTGTAAACTGCTTTTATTAGAGAAGAATATGACGGTAACTAATGAATAAGGGTCGGCTAACTACGTGCCAGCAGCCGCGGTCATACGTAGGACCCAAGCGTTATCCGGAGTGACTGGGCGTAAAGAGTTGCGTAGGCGGTTAGATAAGCGAGTGATGAAAACTATCGGCTCAACCGGTAGCCTATTATTCGAACTGTTTAACTCGAGAGTATCAGAGGTCGCTGGAATTCCTTGTGTAGGAGTGAAATCCGTAGATATAAGGAGGAACACCAATGGCGTAGGCAGGCGACTGGGATATTTCTGACGCTAAG…	Patescibacteria	Saccharimonadia	Saccharimonadales	NA	NA
ACTCCTACGGGAGGCAGCAGTGAGGAATATTGGTCAATGGGGGCAACCCTGAACCAGCCATGCCGCGTGCAGGAAGACGGCTCTATGAGTTGTAAACTGCTTTTATACAGGGATAAATCCATGTACGTGTACGTGGTTGAAGGTACTGTATGAATAAGGATCGGCTAACTCCGTGCCAGCAGCCGCGGTAATACGGAGGATCCAAGCGTTATCCGGATTTATTGGGTTTAAAGGGTGCGTAGGCGGTTTGTTAAGTTAGAGGTGAAATCCGGTGGCTCAACCACCGAACTGCCTCTGATACTGGCAGGCTAGAGATTAGATGCGGTAGGCGGAATGTGTAGTGTAGCGGTGAAATGCTTAGAGATTACACAGAACACCGATTGCGAAGGCAGCTTACCA…	Bacteroidetes	Bacteroidia	Bacteroidales	Rikenellaceae	Alistipes_II
ACTCCTACGGGAGGCAGCAGTGAGGAATATTCCACAATGGGCGAAAGCCTGATGGAGCAATGCCGCGTGCAGGATGAAGGCCTTCGGGTTGTAAACTGCTTTTATTAGAGAAGAATATGACGGTAACTAATGAATAAGGGTCGGCTAACTACGTGCCAGCAGCCGCGGTCATACGTAGGACCCAAGCGTTATCCGGAGTGACTGGGCGTAAAGAGTTGCGTAGGCGGTTAGATAAGCGAGTGATGAAAACTATCGGCTCAACCGGTAGCCTATTATTCGAACTGTTTAACTCGAGAGTATCAGAGGTCGCTGGAATTCCTTGTGTAGGAGTGAAATCCGTAGATATAAGGAGGAACACCAATGGCGTAGGCAGGCGACTGGGATATTTCTGACGCTAAG…	Patescibacteria	Saccharimonadia	Saccharimonadales	NA	NA
ACTCCTACGGGAGGCAGCAGTGAGGAATATTGGTCAATGGACGCAAGTCTGAACCAGCCATGCCGCGTGCAGGAAGACGGCTCTATGAGTTGTAAACTGCTTTTGTGCGAGGGTAAACCCCCTTACGTGTAAGGGGCTGAAAGTATCGTACGAATAAGGATCGGCTAACTCCGTGCCAGCAGCCGCGGTAATACGGAGGATCCAAGCGTTATCCGGATTTATTGGGTTTAAAGGGTGCGTAGGCGGTTTGTTAAGTTAGAGGTGAAATCCCGTGGCTCAACCACGGAACTGCCTCTGATACTGGCAGGCTAGAGAATGGTTGCTGTGGGCGGAATGTGTGGTGTAGCGGTGAAATGCTTAGAGATCACACAGAACACCGATTGCGAAGGCAGCTCACAA…	Bacteroidetes	Bacteroidia	Bacteroidales	Rikenellaceae	Alisitpes_IV
ACTCCTACGGGAGGCAGCAGTGGGGAATATTGCACAATGGGCGAAAGCCTGATGCAGCAACGCCGCGTGAGTGATGAAGGTCTTCGGATTGTAAAGCTCTTTGATTAGGGACGATAATGACGGTACCTAAAGAACAAGCCACGGCTAACTACGTGCCAGCAGCCGCGGTAATACGTAGGTGGCAAGCGTTGTCCGGATTTATTGGGCGTAAAGGGAGCGTAGGCGGACCTTTAAGTCAGATGTGAAATACCCAGGGCTCAACCCGGGTGCTGCATTTGATACTGGAGGTCTAGAGTACAGGAGAGGAGAGTGGAATTCCTAGTGTAGCGGTGAAATGCGTAGAGATTAGGAAGAACACCAGTGGCGAAGGCGACTCTCTGGACTGTAACTGACGCTGAG…	Firmicutes	Clostridia_1	Clostridiales	Clostridiaceae_1	Arthropod_cluster
ACTCCTACGGGAGGCAGCAGTGGGGAATTTTGGACAATGGGCGAAAGCCTGATCCAGCAATGCCGCGTGTGTGAAGAAGGCCTTCGGGTTGTAAAGCACTTTTGTCCGGAAAGAAATCCTTGGCTCTAATACAGTCGGGGGATGACGGTACCGGAAGAATAAGCACCGGCTAACTACGTGCCAGCAGCCGCGGTAATACGTAGGGTGCGAGCGTTAATCGGAATTACTGGGCGTAAAGCGTGCGCAGGCGGTTTGCTAAGACCGATGTGAAATCCCCGGGCTCAACCTGGGAACTGCATTGGTGACTGGCAGGCTAGAGTATGGCAGAGGGGGGTAGAATTCCACGTGTAGCAGTGAAATGCGTAGAGATGTGGAGGAATACCGATGGCGAAGGCAGCC…	Proteobacteria	Betaproteobacteria	Rhodocyclales	Rhodocyclaceae_3	Termite_cluster
ACTCCTACGGGAGGCAGCAGTGAGGAATATTGGTCAATGGGGGCAACCCTGAACCAGCCATGCCGCGTGCAGGAAGACGGCTCTATGAGTTGTAAACTGCTTTTATACAGGGATAAATCATGATACGTGTATCATGTTGCAGGTACTGTATGAATAAGGATCGGCTAACTCCGTGCCAGCAGCCGCGGTAATACGGAGGATCCAAGCGTTATCCGGATTTATTGGGTTTAAAGGGTGCGTAGGCGGCACGGTAAGTTAGCGGTGAAATCGCGGGGCTCAACCCCGCAACTGCCGTTAAAACTGCCGAGCTAGAGAGTAGATGCGGTAGGCGGAATGTGTAGTGTAGCGGTGAAATGCTTAGAGATTACACAGAACACCGATTGCGAAGGCAGCTTACCA…	Bacteroidetes	Bacteroidia	Bacteroidales	Rikenellaceae	Alistipes_II
ACTCCTACGGGAGGCAGCAGTAGGGAATCTTCGGCAATGGGCGCAAGCCTGACCGAGCAACGCCGCGTGAGTGAAGAAGGTTTTCGGATCGTAAAGCTCTGTTGATAGAGAAGAACGGGTGAGAGAGTGGAAAATTCTTGCTTTGACGGTATCTATCCAGAAAGGGACGGCTAACTACGTGCCAGCAGCCGCGGTAATACGTAGGTCCCGAGCGTTGTCCGGATTTATTGGGCGTAAAGCGAGCGCAGGTGGTTCTTTAAGTCTGATGTAAAAGGCAGTGGCTCAACCATTGTAGGCATTGGAAACTGGGGAACTTGAGTGCAGTAGAGGAGAGTGGAATTCCATGTGTAGCGGTGAAATGCGTAGATATATGGAGGAACACCGGAGGCGAAAGCGGCT…	Firmicutes	Bacilli	Lactobacillales	Streptococcaceae	Lactococcus_3
ACTCCTACGGGAGGCAGCAGTGAGGAATATTGGTCAATGGTCGGAAGACTGAACCAGCCAAGTCGCGTGAAGGAAGAAGGATCTATGGTTCGTAAACTTCTTTTATGGGGGAATAAGTATGGGGACGTGTCCCTGTTTATTGCATGTACCCCATGAATAAGCATCGGCTAACTCCGTGCCAGCAGCCGCGGTAATACGGAGGATGCGAGCGTTATCCGGATTTATTGGGTTTAAAGGGTGCGTAGGTGGATGTTTAAGTCCGCGGTGAAAGGTTGTCGCTTAACGATAAAATTGCCGTTGAAACTGGATATCTTGAGTATGTTTGAAGTAGGCGGAATGCGTGGTGTAGCGGTGAAATGCATAGATATCACGCAGAACTCCGATAGCGAAGGCAGCTTA…	Bacteroidetes	Bacteroidia	Bacteroidales	Porphyromonadaceae_3	Tannerella
ACTCCTACGGGAGGCAGCAGTGGGGAATATTGCACAATGGACGGAAGTCTGATGCAGCAACGCCGCGTGGAGGATGACACATTTCGGTGCGTAAACTCCTTTTATGTAAGAAGATAATGACGGTATTATATGAATAAGCACCGGCTAACTCCGTGCCAGCAGCCGCGGTAATACGGGGGGTGCAAGCGTTACTCGGAATCACTGGGCGTAAAGAGCGTGTAGGCGGATTGATAAGTTTGAAGTGAAATCCTATAGCTTAACTATAGAACTGCTTTGAAAACTGTTAGTCTAGAATGTGGGAGAGGTAGATGGAATTTCTGGTGTAGGGGTAAAATCCGTAGAGATCAGAAGGAATACCGATTGCGAAGGCGATCTACTGGAACAATATTGACGCTGAGA…	Proteobacteria	Epsilonproteobacteria	Campylobacterales	Campylobacteraceae	Arcobacter
ACTCCTACGGGAGGCAGCAGTGGGGAATATTGCACAATGGACGGAAGTCTGATGCAGCAACGCCGCGTGGAGGATGACACATTTCGGTGCGTAAACTCCTTTTATGTAAGAAGATAATGACGGTATTATATGAATAAGCACCGGCTAACTCCGTGCCAGCAGCCGCGGTAATACGGGGGGTGCAAGCGTTACTCGGAATCACTGGGCGTAAAGAGCGTGTAGGCGGATTGATAAGTTTGAAGTGAAATCCTATAGCTTAACTATAGAACTGCTTTGAAAACTGTTAGTCTAGAATGTGGGAGAGGTAGATGGAATTTCTGGTGTAGGGGTAAAATCCGTAGAGATCAGAAGGAATACCGATTGCGAAGGCGATCTACTGGAACAATATTGACGCTGAGA…	Proteobacteria	Epsilonproteobacteria	Campylobacterales	Campylobacteraceae	Arcobacter
ACTCCTACGGGAGGCAGCAGTGAGGAATATTCCACAATGGGCGAAAGCCTGATGGAGCAATGCCGCGTGCAGGATGAAGGCCTTCGGGTTGTAAACTGCTTTTATTAGAGAAGAATATGACGGTAACTAATGAATAAGGGTCGGCTAACTACGTGCCAGCAGCCGCGGTCATACGTAGGACCCAAGCGTTATCCGGAGTGACTGGGCGTAAAGAGTTGCGTAGGCGGTTAGATAAGCGAGTGATGAAAACTATCGGCTCAACCGGTAGCCTATTATTCGAACTGTTTAACTCGAGAGTATCAGAGGTCGCTGGAATTCCTTGTGTAGGAGTGAAATCCGTAGATATAAGGAGGAACACCAATGGCGTAGGCAGGCGACTGGGATATTTCTGACGCTAAG…	Patescibacteria	Saccharimonadia	Saccharimonadales	NA	NA
ACTCCTACGGGAGGCAGCAGTGAGGAATATTGGTCAATGGGGGCAACCCTGAACCAGCCATGCCGCGTGCAGGAAGACGGCTCTATGAGTTGTAAACTGCTTTTATACAGGGATAAATCATGATACGTGTATCATGTTGCAGGTACTGTATGAATAAGGATCGGCTAACTCCGTGCCAGCAGCCGCGGTAATACGGAGGATCCAAGCGTTATCCGGATTTATTGGGTTTAAAGGGTGCGTAGGCGGCACGGTAAGTTAGCGGTGAAATCGCGGGGCTCAACCCCGCAACTGCCGTTAAAACTGCCGAGCTAGAGAGTAGATGCGGTAGGCGGAATGTGTAGTGTAGCGGTGAAATGCTTAGAGATTACACAGAACACCGATTGCGAAGGCAGCTTACCA…	Bacteroidetes	Bacteroidia	Bacteroidales	Rikenellaceae	Alistipes_II
ACTCCTACGGGAGGCAGCAGTGGGGAATTTTGGACAATGGGCGAAAGCCTGATCCAGCAATGCCGCGTGTGTGAAGAAGGCCTTCGGGTTGTAAAGCACTTTTGTCCGGAAAGAAATCCTTGGCTCTAATACAGTCGGGGGATGACGGTACCGGAAGAATAAGCACCGGCTAACTACGTGCCAGCAGCCGCGGTAATACGTAGGGTGCGAGCGTTAATCGGAATTACTGGGCGTAAAGCGTGCGCAGGCGGTTTGCTAAGACCGATGTGAAATCCCCGGGCTCAACCTGGGAACTGCATTGGTGACTGGCAGGCTAGAGTATGGCAGAGGGGGGTAGAATTCCACGTGTAGCAGTGAAATGCGTAGAGATGTGGAGGAATACCGATGGCGAAGGCAGCC…	Proteobacteria	Betaproteobacteria	Rhodocyclales	Rhodocyclaceae_3	Termite_cluster
ACTCCTACGGGAGGCAGCAGTGGGGGATATTGCACAATGGGCGAAAGCCTGATGCAGCGACGCCGCGTGAGGGAAGAAGGTTTTCGGATTGTAAACCTCTGTCTTCGAGGACGAAGAAGTGACGGTACTCGAGGAGGAAGCCACGGCTAACTACGTGCCAGCAGCCGCGGTAAAACGTAGGTGGCAAGCGTTGTCCGGAATTACTGGGTGTAAAGGGAGCGCAGGCGGGGCGATAAGTTGAATGTGAAATGTATGGGCTCAACCCATAGACTGCGTTCAAAACTATCGTTCTTGAGTGATGTAGAGGCAGGCGGAATTCCCGGTGTAGCGGTGGAATGCGTAGATATCGGGAGGAACACCAGTGGCGAAGGCGGCCTGCTGGGCATAAACTGACGCTGA…	Firmicutes	Clostridia_1	Clostridiales	Ruminococcaceae	Termite_cockroach_cluster
ACTCCTACGGGAGGCAGCAGTGGGGAATATTGCACAATGGGCGAAAGCCTGATGCAGCAACGCCGCGTGAGTGATGACGGTCTTCGGATTGTAAAGCTCTTTGATTAGGGACGATAATGACGGTACCTAAAGAACAAGCCACGGCTAACTACGTGCCAGCAGCCGCGGTAATACGTAGGTGGCAAGCGTTGTCCGGATTTATTGGGCGTAAAGGGAGCGTAGGCGGACCTTTAAGTCAGATGTGAAATACCCAGGGCTCAACCCGGGTGCTGCATTTGATACTGGAGGTCTAGAGTACAGGAGAGGAGAGTGGAATTCCTAGTGTAGCGGTGAAATGCGTAGAGATTAGGAAGAACACCAGTGGCGAAGGCGACTCTCTGGACTGTAACTGACGCTGAG…	Firmicutes	Clostridia_1	Clostridiales	Clostridiaceae_1	Arthropod_cluster
ACTCCTACGGGAGGCAGCAGTAGGGAATCTTCGGCAATGGGCGCAAGCCTGACCGAGCAACGCCGCGTGAGTGAAGAAGGTTTTCGGATCGTAAAGCTCTGTTGATAGAGAAGAACGGGTGAGAGAGTGGAAAATTCTTGCTTTGACGGTATCTATCCAGAAAGGGACGGCTAACTACGTGCCAGCAGCCGCGGTAATACGTAGGTCCCGAGCGTTGTCCGGATTTATTGGGCGTAAAGCGAGCGCAGGTGGTTCTTTAAGTCTGATGTAAAAGGCAGTGGCTCAACCATTGTAGGCATTGGAAACTGGGGAACTTGAGTGCAGTAGAGGAGAGTGGAATTCCATGTGTAGCGGTGAAATGCGTAGATATATGGAGGAACACCGGAGGCGAAAGCGGCT…	Firmicutes	Bacilli	Lactobacillales	Streptococcaceae	Lactococcus_3
ACTCCTACGGGAGGCAGCAGTGGGGAATTTTGGACAATGGGGGCAACCCTGATCCAGCCATGCCGCGTGAGTGAAGAAGGCCTTCGGGTTGTAAAGCTCTTTTGTACGGGAAGAAAAGGTTATTGCTAATATCGATGATACTTGACGGTACCGTAAGAATAAGCACCGGCTAACTACGTGCCAGCAGCCGCGGTAATACGTAGGGTGCAAGCGTTAATCGGAATTACTGGGCGTAAAGCGTGCGCAGGCGGCTTGTTGTGTCTGCTGTGAAATCCCCGGGCTTAACCTGGGAACTGCGGTGGAAACTGGCAAGCTTGAGTGTGGCAGAGGGGGGTGGAATTCCACGTGTAGCAGTGAAATGCGTAGAGATGTGGAGGAACACCGATGGCGAAGGCAGCC…	Proteobacteria	Betaproteobacteria	Rhodocyclales	Rhodocyclaceae_3	Termite_cluster
ACTCCTACGGGAGGCAGCAGTGAGGAATCTTCCACAATGGGCGAAAGCCTGATGGAGCAATGCCGCGTGCAGGATGAAGGCCTTCGGGTTGTAAACTGCTTTTATTAGAGAAGAATATGACGGTAACTAATGAATAAGGGTCGGCTAACTACGTGCCAGCAGCCGCGGTCATACGTAGGACCCAAGCGTTATCCGGAGTGACTGGGCGTAAAGAGTTGCGTAGGCGGCGTGCTAAGCGAGTAGTGAAAATTATCGGCTCAACCGATAACCTATTATTCGAACTGGCATGCTCGAGAATAGTAGAGGTAGCTGGAATTACTAGTGTAGGAGTGGAATCCGTAGATATTAGTAGGAACACCAATGGCGTAGGCAGGCTACTGGACTATTTCTGACGCTAAG…	Patescibacteria	Saccharimonadia	Saccharimonadales	NA	NA
ACTCCTACGGGAGGCAGCAGTGGGGAATATTGCACAATGGGGGAAACCCTGATGCAGCAACGCCGCGTGGAGGATGACGCATTTCGGTGTGTAAACTCCTTTTATTTGGGAAGATAATGACGGTACCAAATGAATAAGCACCGGCTAACTCCGTGCCAGCAGCCGCGGTAATACGGAGGGTGCAAGCGTTACTCGGAATCACTGGGCGTAAAGGGTGCGTAGGCGGGTTATCAAGTCTTAAGTGAAATCCAACAGCTTAACTGTTGAACTGCTTAGGAAACTGGCAACCTAGAGTAAGGGAGAGGTAGATGGAATTGGTGGTGTAGGGGTAAAATCCGTAGATATCACCAGGAATACTCATTGCGAAGGCGATCTACTGGAACTTAACTGACGCTGAGG…	Proteobacteria	Epsilonproteobacteria	Campylobacterales	Campylobacteraceae	Sulfurospirillum
ACTCCTACGGGAGGCAGCAGTGGGGAATTTTGGACAATGGGGGCAACCCTGATCCAGCCATGCCGCGTGAGTGAAGAAGGCCTTCGGGTTGTAAAGCTCTTTTGTACGGGAAGAAAAGGTTATTGCTAATATCGATGATACTTGACGGTACCGTAAGAATAAGCACCGGCTAACTACGTGCCAGCAGCCGCGGTAATACGTAGGGTGCAAGCGTTAATCGGAATTACTGGGCGTAAAGCGTGCGCAGGCGGCTTGTTGTGTCTGCTGTGAAATCCCCGGGCTTAACCTGGGAACTGCGGTGGAAACTGGCAAGCTTGAGTGTGGCAGAGGGGGGTGGAATTCCACGTGTAGCAGTGAAATGCGTAGAGATGTGGAGGAACACCGATGGCGAAGGCAGCC…	Proteobacteria	Betaproteobacteria	Rhodocyclales	Rhodocyclaceae_3	Termite_cluster
ACTCCTACGGGAGGCAGCAGTAAGGAATATTGGGCAATGGACGCAAGTCTGACCCAGCCATGCCGCGTGAAGGAAGACAGCCCTATGGGTTGTAAACTTCTTTTAACAGAGGATAAAGTCGCGTATGTATACGCGTTTGCAGGTATCTGTTGAATAAGCATCGGCTAACTCCGTGCCAGCAGCCGCGGTAATACGGAGGATGCAAGCGTTATCCGGATTCATTGGGTTTAAAGGGTGCGCAGGCGGACTTTTAAGTCAGCGGTGAAATTCCACGGCTCAACCGTGGCGCTGCCGTTGATACTGGGAGTCTTGAGTGTGATTGAGGTGGGCGGAATGTAGCGTGTAGCGGTGAAATGCATAGATATGCTACAGAACACCAATTGCGAAGGCAGCTCACCA…	Bacteroidetes	Sphingobacteria	Sphingobacteriales_1	SB_1	Termite_cluster
ACTCCTACGGGAGGCAGCAGTGAGGAATATTGGTCAATGGACGAGAGTCTGAACCAGCCAAGTAGCGTGAAGGATGACTGCCCTATGGGTTGTAAACTTCTTTTATACGGGAATAAAATGCGGTACGTGTACCGTTTTGTATGTACCGTATGAATAAGGATCGGCTAACTCCGTGCCAGCAGCCGCGGTAATACGGAGGATCCGAGCGTTATCCGGATTTATTGGGTTTAAAGGGAGCGTAGGCGGAAGCTTAAGTCAGTTGTGAAAGTTTGAGGCTCAACCTTAAAATTGCAGTTGAAACTGGGTTTCTTGAGTGCGGCATAGGTGGGCGGAATTCGTGGTGTAGCGGTGAAATGCTTAGATATCACGAAGAACTCCGATTGCGAAGGCAGCTCACTG…	Bacteroidetes	Bacteroidia	Bacteroidales	Porphyromonadaceae_1	Dysgonomonas
ACTCCTACGGGAGGCAGCAGTGGGGAATATTGCGCAATGGGCGAAAGCCTGACGCAGCGACGCCGCGTGAGGGATGAAGGCCTTCGGGTCGTAAACCTCTGTCAGGAGGGAAGAAGTGCGAACGTGCTAATCAGCGTTCGTTTGACGGTACCTCCAAAGGAAGCACCGGCTAACTCCGTGCCAGCAGCCGCGGTAATACGGAGGGTGCAAGCGTTAATCGGAATCACTGGGCGTAAAGCGCGCGTAGGCGGCTTGTTAAGTCAGGGGTGAAATCCCACGGCCCACCCGTGGAACTGCCCTTGATACTGTCAGGCTAGAGTGTGTGAGAGGATAGCGGAATTCCTGGTGTAGGAGTGAAATCCGTAGAGATCAGGAGGAACATCAGTGGCGAAGGCGGCT…	Proteobacteria	Deltaproteobacteria	Desulfovibrionales	Desulfovibrionaceae	Gut_cluster_3
ACTCCTACGGGAGGCAGCAGTGAGGAATCTTCCACAATGGGCGAAAGCCTGATGGAGCAATGCCGCGTGCAGGATGAAGGCCTTCGGGTTGTAAACTGCTTTTATTAGAGAAGAATATGACGGTAACTAATGAATAAGGGTCGGCTAACTACGTGCCAGCAGCCGCGGTCATACGTAGGACCCAAGCGTTATCCGGAGTGACTGGGCGTAAAGAGTTGCGTAGGCGGCGTGCTAAGCGAGTAGTGAAAATTATCGGCTCAACCGATAACCTATTATTCGAACTGGCATGCTCGAGAATAGTAGAGGTAGCTGGAATTACTAGTGTAGGAGTGGAATCCGTAGATATTAGTAGGAACACCAATGGCGTAGGCAGGCTACTGGACTATTTCTGACGCTAAG…	Patescibacteria	Saccharimonadia	Saccharimonadales	NA	NA
ACTCCTACGGGAGGCAGCAGTGAGGAATATTGGTCAATGGACGCAAGTCTGAACCAGCCATGCCGCGTGCAGGAAGACGGCTCTATGAGTTGTAAACTGCTTTTGTACGAGGGTAAACCCTGATACGTGTATCAGGCTGAAAGTATCGTACGAATAAGGATCGGCTAACTCCGTGCCAGCAGCCGCGGTAATACGGAGGATCCAAGCGTTATCCGGATTTATTGGGTTTAAAGGGTGCGTAGGCGGTTTGTTAAGTTAGAGGTGAAATTCCGTGGCTCAACCACGGCACTGCCTCTGATACTGGCAGGCTAGAGAATGGTTGCTGTGGGCGGAATGTGTGGTGTAGCGGTGAAATGCTTAGAGATCACACAGAACACCGATTGCGAAGGCAGCTCACAA…	Bacteroidetes	Bacteroidia	Bacteroidales	Rikenellaceae	Alisitpes_IV
ACTCCTACGGGAGGCAGCAGTGGGGAATATTGCACAATGGACGGAAGTCTGATGCAGCAACGCCGCGTGGAGGATGACACATTTCGGTGCGTAAACTCCTTTTATGTAAGAAGATAATGACGGTATTATATGAATAAGCACCGGCTAACTCCGTGCCAGCAGCCGCGGTAATACGGGGGGTGCAAGCGTTACTCGGAATCACTGGGCGTAAAGAGCGTGTAGGCGGATTGATAAGTTTGAAGTGAAATCCTATAGCTTAACTATAGAACTGCTTTGAAAACTGTTAGTCTAGAATGTGGGAGAGGTAGATGGAATTTCTGGTGTAGGGGTAAAATCCGTAGAGATCAGAAGGAATACCGATTGCGAAGGCGATCTACTGGAACAATATTGACGCTGAGA…	Proteobacteria	Epsilonproteobacteria	Campylobacterales	Campylobacteraceae	Arcobacter
ACTCCTACGGGAGGCAGCAGTGAGGAATATTGGTCAATGGACGAGAGTCTGAACCAGCCAAGTAGCGTGAAGGATGACTGCCCTATGGGTTGTAAACTTCTTTTATACGGGAATAAAATGCGGTACGTGTACCGTTTTGTATGTACCGTATGAATAAGGATCGGCTAACTCCGTGCCAGCAGCCGCGGTAATACGGAGGATCCGAGCGTTATCCGGATTTATTGGGTTTAAAGGGAGCGTAGGCGGAAGCTTAAGTCAGTTGTGAAAGTTTGAGGCTCAACCTTAAAATTGCAGTTGAAACTGGGTTTCTTGAGTGCGGCATAGGTGGGCGGAATTCGTGGTGTAGCGGTGAAATGCTTAGATATCACGAAGAACTCCGATTGCGAAGGCAGCTCACTG…	Bacteroidetes	Bacteroidia	Bacteroidales	Porphyromonadaceae_1	Dysgonomonas
ACTCCTACGGGAGGCAGCAGTGGGGAATATTGCACAATGGACGGAAGTCTGATGCAGCAACGCCGCGTGGAGGATGACACATTTCGGTGCGTAAACTCCTTTTATGTAAGAAGATAATGACGGTATTATATGAATAAGCACCGGCTAACTCCGTGCCAGCAGCCGCGGTAATACGGGGGGTGCAAGCGTTACTCGGAATCACTGGGCGTAAAGAGCGTGTAGGCGGATTGATAAGTTTGAAGTGAAATCCTATAGCTTAACTATAGAACTGCTTTGAAAACTGTTAGTCTAGAATGTGGGAGAGGTAGATGGAATTTCTGGTGTAGGGGTAAAATCCGTAGAGATCAGAAGGAATACCGATTGCGAAGGCGATCTACTGGAACAATATTGACGCTGAGA…	Proteobacteria	Epsilonproteobacteria	Campylobacterales	Campylobacteraceae	Arcobacter
ACTCCTACGGGAGGCAGCAGTGAGGAATCTTCCACAATGGGCGAAAGCCTGATGGAGCAATGCCGCGTGCAGGATGAAGGCCTTCGGGTTGTAAACTGCTTTTATTAGAGAAGAATATGACGGTAACTAATGAATAAGGGTCGGCTAACTACGTGCCAGCAGCCGCGGTCATACGTAGGACCCAAGCGTTATCCGGAGTGACTGGGCGTAAAGAGTTGCGTAGGCGGCGTGCTAAGCGAGTAGTGAAAATTATCGGCTCAACCGATAACCTATTATTCGAACTGGCATGCTCGAGAATAGTAGAGGTAGCTGGAATTACTAGTGTAGGAGTGGAATCCGTAGATATTAGTAGGAACACCAATGGCGTAGGCAGGCTACTGGACTATTTCTGACGCTAAG…	Patescibacteria	Saccharimonadia	Saccharimonadales	NA	NA
ACTCCTACGGGAGGCAGCAGTGGGGAATATTGCACAATGGGCGCAAGCCTGATGCAGCCATGCCGCGTGTATGAAGAAGGCCTTCGGGTTGTAAAGTACTTTCAGCGGGGAGGAAGGGAGTAAAGTTAATACCTTTGCTCATTGACGTTACCCGCAGAAGAAGCACCGGCTAACTCCGTGCCAGCAGCCGCGGTAATACGGAGGGTGCAAGCGTTAATCGGAATTACTGGGCGTAAAGCGCACGCAGGCGGTTTGTTAAGTCAGATGTGAAATCCCCGGGCTCAACCTGGGAACTGCATCTGATACTGGCAAGCTTGAGTCTCGTAGAGGGGGGTAGAATTCCAGGTGTAGCGGTGAAATGCGTAGAGATCTGGAGGAATACCGGTGGCGAAGGCGGCC…	Proteobacteria	Gammaproteobacteria_1	Enterobacteriales	Enterobacteriaceae	Escherichia_blattae_cluster
ACTCCTACGGGAGGCAGCAGTGAGGAATATTGGTCAATGGGGGCAACCCTGAACCAGCCATGCCGCGTGCAGGAAGACGGCTCTATGAGTTGTAAACTGCTTTTATACAGGGATAAATCATGATACGTGTATCATGTTGCAGGTACTGTATGAATAAGGATCGGCTAACTCCGTGCCAGCAGCCGCGGTAATACGGAGGATCCAAGCGTTATCCGGATTTATTGGGTTTAAAGGGTGCGTAGGCGGCACGGTAAGTTAGCGGTGAAATCGCGGGGCTCAACCCCGCAACTGCCGTTAAAACTGCCGAGCTAGAGAGTAGATGCGGTAGGCGGAATGTGTAGTGTAGCGGTGAAATGCTTAGAGATTACACAGAACACCGATTGCGAAGGCAGCTTACCA…	Bacteroidetes	Bacteroidia	Bacteroidales	Rikenellaceae	Alistipes_II
ACTCCTACGGGAGGCAGCAGTGGGGAATATTGGACAATGGGCGAAAGCCTGATCCAGCAATGCCGCGTGAGTGATGAAGGCCTTAGGGTTGTAAAGCTCTTTTACCCGGGATGATAATGACAGTACCGGGAGAATAAGCTCCGGCTAACTCCGTGCCAGCAGCCGCGGTAATACGGAGGGAGCTAGCGTTATTCGGAATTACTGGGCGTAAAGCGCACGTAGGCGGCTTTGTAAGTTAGAGGTGAAAGCCTGGAGCTCAACTCCAGAATTGCCTTTAAGACTGCATCGCTTGAATCCAGGAGAGGTGAGTGGAATTCCGAGTGTAGAGGTGAAATTCGTAGATATTCGGAAGAACACCAGTGGCGAAGGCGGCTCACTGGACTGGTATTGACGCTGAGG…	Proteobacteria	Alphaproteobacteria	Sphingomonadales	Sphingomonadaceae	Sphingomonas
ACTCCTACGGGAGGCAGCAGTGGGGAATTTTGGACAATGGGGGCAACCCTGATCCAGCCATGCCGCGTGAGTGAAGAAGGCCTTCGGGTTGTAAAGCTCTTTTGTACGGGAAGAAAAGGTTATTGCTAATATCGATGATACTTGACGGTACCGTAAGAATAAGCACCGGCTAACTACGTGCCAGCAGCCGCGGTAATACGTAGGGTGCAAGCGTTAATCGGAATTACTGGGCGTAAAGCGTGCGCAGGCGGCTTGTTGTGTCTGCTGTGAAATCCCCGGGCTTAACCTGGGAACTGCGGTGGAAACTGGCAAGCTTGAGTGTGGCAGAGGGGGGTGGAATTCCACGTGTAGCAGTGAAATGCGTAGAGATGTGGAGGAACACCGATGGCGAAGGCAGCC…	Proteobacteria	Betaproteobacteria	Rhodocyclales	Rhodocyclaceae_3	Termite_cluster
ACTCCTACGGGAGGCAGCAGTGGGGAATATTGCACAATGGGCGAAAGCCTGATGCAGCAACGCCGCGTGAGTGATGAAGGTCTTCGGATTGTAAAGCTCTTTGATTAGGGACGATAATGACGGTACCTAAAGAACAAGCCACGGCTAACTACGTGCCAGCAGCCGCGGTAATACGTAGGTGGCAAGCGTTGTCCGGATTTATTGGGCGTAAAGGGAGCGTAGGCGGACCTTTAAGTCAGATGTGAAATACCCAGGGCTCAACCCGGGTGCTGCATTTGATACTGGAGGTCTAGAGTACAGGAGAGGAGAGTGGAATTCCTAGTGTAGCGGTGAAATGCGTAGAGATTAGGAAGAACACCAGTGGCGAAGGCGACTCTCTGGACTGTAACTGACGCTGAG…	Firmicutes	Clostridia_1	Clostridiales	Clostridiaceae_1	Arthropod_cluster
ACTCCTACGGGAGGCAGCAGTGAGGAATATTCCACAATGGGCGAAAGCCTGATGGAGCAATGCCGCGTGCAGGATGAAGGCCTTCGGGTTGTAAACTGCTTTTATTAGAGAAGAATATGACGGTAACTAATGAATAAGGGTCGGCTAACTACGTGCCAGCAGCCGCGGTCATACGTAGGACCCAAGCGTTATCCGGAGTGACTGGGCGTAAAGAGTTGCGTAGGCGGTTAGATAAGCGAGTGATGAAAACTATCGGCTCAACCGGTAGCCTATTATTCGAACTGTTTAACTCGAGAGTATCAGAGGTCGCTGGAATTCCTTGTGTAGGAGTGAAATCCGTAGATATAAGGAGGAACACCAATGGCGTAGGCAGGCGACTGGGATATTTCTGACGCTAAG…	Patescibacteria	Saccharimonadia	Saccharimonadales	NA	NA
ACTCCTACGGGAGGCAGCAGTAGGGAATCTTCGGCAATGGGCGCAAGCCTGACCGAGCAACGCCGCGTGAGTGAAGAAGGTTTTCGGATCGTAAAGCTCTGTTGATAGAGAAGAACGGGTGAGAGAGTGGAAAATTCTTGCTTTGACGGTATCTATCCAGAAAGGGACGGCTAACTACGTGCCAGCAGCCGCGGTAATACGTAGGTCCCGAGCGTTGTCCGGATTTATTGGGCGTAAAGCGAGCGCAGGTGGTTCTTTAAGTCTGATGTAAAAGGCAGTGGCTCAACCATTGTAGGCATTGGAAACTGGGGAACTTGAGTGCAGTAGAGGAGAGTGGAATTCCATGTGTAGCGGTGAAATGCGTAGATATATGGAGGAACACCGGAGGCGAAAGCGGCT…	Firmicutes	Bacilli	Lactobacillales	Streptococcaceae	Lactococcus_3
ACTCCTACGGGAGGCAGCAGTGGGGGATATTGCACAATGGGCGAAAGCCTGATGCAGCGACGCCGCGTGAGGGAAGAAGGTTTTCGGATTGTAAACCTCTGTCTTCGAGGACGAAGAAGTGACGGTACTCGAGGAGGAAGCCACGGCTAACTACGTGCCAGCAGCCGCGGTAAAACGTAGGTGGCAAGCGTTGTCCGGAATTACTGGGTGTAAAGGGAGCGCAGGCGGGACGATAAGTTGAATGTGAAATGTATGGGCTCAACCCATAGACTGCGTTCAAAACTATCGTTCTTGAGTGATGTAGAGGCAGGCGGAATTCCCGGTGTAGCGGTGGAATGCGTAGATATCGGGAGGAACACCAGTGGCGAAGGCGGCCTGCTGGGCATAAACTGACGCTGA…	Firmicutes	Clostridia_1	Clostridiales	Ruminococcaceae	Termite_cockroach_cluster
ACTCCTACGGGAGGCAGCAGTGAGGAATATTGGTCAATGGGGGCAACCCTGAACCAGCCATGCCGCGTGCAGGAAGACGGCTCTATGAGTTGTAAACTGCTTTTATACAGGGATAAATCATGATACGTGTATCATGTTGCAGGTACTGTATGAATAAGGATCGGCTAACTCCGTGCCAGCAGCCGCGGTAATACGGAGGATCCAAGCGTTATCCGGATTTATTGGGTTTAAAGGGTGCGTAGGCGGCACGGTAAGTTAGCGGTGAAATCGCGGGGCTCAACCCCGCAACTGCCGTTAAAACTGCCGAGCTAGAGAGTAGATGCGGTAGGCGGAATGTGTAGTGTAGCGGTGAAATGCTTAGAGATTACACAGAACACCGATTGCGAAGGCAGCTTACCA…	Bacteroidetes	Bacteroidia	Bacteroidales	Rikenellaceae	Alistipes_II
ACTCCTACGGGAGGCAGCAGTGAGGAATATTGGTCAATGGGGGCAACCCTGAACCAGCCATGCCGCGTGCAGGAAGACGGCTCTATGAGTTGTAAACTGCTTTTGTACAGGGATAAATACATATACGTGTATATGTTTGAAGGTACTGTACGAATAAGGATCGGCTAACTCCGTGCCAGCAGCCGCGGTAATACGGAGGATCCGAGCGTTATCCGGATTTATTGGGTTTAAAGGGTGCGTAGGCGGCGAGGTAAGTTAGAGGTGAAATCCCGTGGCTCAACCACGGAACCGCCTCTGATACTGCTTTGCTAGAGAGTAGATGCGGTAGGCGGAATGTGTAGTGTAGCGGTGAAATGCTTAGAGATTACACAGAACACCGATTGCGAAGGCAGCTTACCA…	Bacteroidetes	Bacteroidia	Bacteroidales	Rikenellaceae	Alistipes_II
ACTCCTACGGGAGGCAGCAGTGAGGAATATTGGTCAATGGACGAGAGTCTGAACCAGCCAAGTAGCGTGAAGGATGACTGCCCTATGGGTTGTAAACTTCTTTTATACGGGAATAAAATGCGGTACGTGTACCGTTTTGTATGTACCGTATGAATAAGGATCGGCTAACTCCGTGCCAGCAGCCGCGGTAATACGGAGGATCCGAGCGTTATCCGGATTTATTGGGTTTAAAGGGAGCGTAGGCGGAAGCTTAAGTCAGTTGTGAAAGTTTGAGGCTCAACCTTAAAATTGCAGTTGAAACTGGGTTTCTTGAGTGCGGCATAGGTGGGCGGAATTCGTGGTGTAGCGGTGAAATGCTTAGATATCACGAAGAACTCCGATTGCGAAGGCAGCTCACTG…	Bacteroidetes	Bacteroidia	Bacteroidales	Porphyromonadaceae_1	Dysgonomonas
ACTCCTACGGGAGGCAGCAGTGGGGAATATTGCACAATGGGGGAAACCCTGATGCAGCAACGCCGCGTGGAGGATGACGCATTTCGGTGTGTAAACTCCTTTTATTTGGGAAGATAATGACGGTACCAAATGAATAAGCACCGGCTAACTCCGTGCCAGCAGCCGCGGTAATACGGAGGGTGCAAGCGTTACTCGGAATCACTGGGCGTAAAGGGTGCGTAGGCGGGTTATCAAGTCTTAAGTGAAATCCAACAGCTTAACTGTTGAACTGCTTAGGAAACTGGCAACCTAGAGTAAGGGAGAGGTAGATGGAATTGGTGGTGTAGGGGTAAAATCCGTAGATATCACCAGGAATACTCATTGCGAAGGCGATCTACTGGAACTTAACTGACGCTGAGG…	Proteobacteria	Epsilonproteobacteria	Campylobacterales	Campylobacteraceae	Sulfurospirillum
ACTCCTACGGGAGGCAGCAGTGGGGAATATTGGACAATGGGCGAAAGCCTGATCCAGCAATGCCGCGTGAGTGATGAAGGCCTTAGGGTTGTAAAGCTCTTTTACCCGGGATGATAATGACAGTACCGGGAGAATAAGCTCCGGCTAACTCCGTGCCAGCAGCCGCGGTAATACGGAGGGAGCTAGCGTTATTCGGAATTACTGGGCGTAAAGCGCACGTAGGCGGCTTTGTAAGTTAGAGGTGAAAGCCTGGAGCTCAACTCCAGAATTGCCTTTAAGACTGCATCGCTTGAATCCAGGAGAGGTGAGTGGAATTCCGAGTGTAGAGGTGAAATTCGTAGATATTCGGAAGAACACCAGTGGCGAAGGCGGCTCACTGGACTGGTATTGACGCTGAGG…	Proteobacteria	Alphaproteobacteria	Sphingomonadales	Sphingomonadaceae	Sphingomonas
ACTCCTACGGGAGGCAGCAGTGAGGAATATTGGTCAATGGGGGCAACCCTGAACCAGCCATGCCGCGTGCAGGAAGACGGCTCTATGAGTTGTAAACTGCTTTTATACAGGGATAAATCATGATACGTGTATCATGTTGCAGGTACTGTATGAATAAGGATCGGCTAACTCCGTGCCAGCAGCCGCGGTAATACGGAGGATCCAAGCGTTATCCGGATTTATTGGGTTTAAAGGGTGCGTAGGCGGCACGGTAAGTTAGCGGTGAAATCGCGGGGCTCAACCCCGCAACTGCCGTTAAAACTGCCGAGCTAGAGAGTAGATGCGGTAGGCGGAATGTGTAGTGTAGCGGTGAAATGCTTAGAGATTACACAGAACACCGATTGCGAAGGCAGCTTACCA…	Bacteroidetes	Bacteroidia	Bacteroidales	Rikenellaceae	Alistipes_II
ACTCCTACGGGAGGCAGCAGTGGGGGATATTGCACAATGGGCGAAAGCCTGATGCAGCGACGCCGCGTGAGGGAAGAAGGTTTTCGGATTGTAAACCTCTGTCTTCGAGGACGAAGAAGTGACGGTACTCGAGGAGGAAGCCACGGCTAACTACGTGCCAGCAGCCGCGGTAAAACGTAGGTGGCAAGCGTTGTCCGGAATTACTGGGTGTAAAGGGAGCGCAGGCGGGACGATAAGTTGAATGTGAAATGTATGGGCTCAACCCATAGACTGCGTTCAAAACTATCGTTCTTGAGTGATGTAGAGGCAGGCGGAATTCCCGGTGTAGCGGTGGAATGCGTAGATATCGGGAGGAACACCAGTGGCGAAGGCGGCCTGCTGGGCATAAACTGACGCTGA…	Firmicutes	Clostridia_1	Clostridiales	Ruminococcaceae	Termite_cockroach_cluster
ACTCCTACGGGAGGCAGCAGTGAGGAATATTGGTCAATGGACGAGAGTCTGAACCAGCCAAGTAGCGTGAAGGATGACTGCCCTATGGGTTGTAAACTTCTTTTATACGGGAATAAAATGCGGTACGTGTACCGTTTTGTATGTACCGTATGAATAAGGATCGGCTAACTCCGTGCCAGCAGCCGCGGTAATACGGAGGATCCGAGCGTTATCCGGATTTATTGGGTTTAAAGGGAGCGTAGGCGGAAGCTTAAGTCAGTTGTGAAAGTTTGAGGCTCAACCTTAAAATTGCAGTTGAAACTGGGTTTCTTGAGTGCGGCATAGGTGGGCGGAATTCGTGGTGTAGCGGTGAAATGCTTAGATATCACGAAGAACTCCGATTGCGAAGGCAGCTCACTG…	Bacteroidetes	Bacteroidia	Bacteroidales	Porphyromonadaceae_1	Dysgonomonas
ACTCCTACGGGAGGCAGCAGTGAGGAATCTTCCACAATGGGCGAAAGCCTGATGGAGCAATGCCGCGTGCAGGATGAAGGCCTTCGGGTTGTAAACTGCTTTTATTAGAGAAGAATATGACGGTAACTAATGAATAAGGGTCGGCTAACTACGTGCCAGCAGCCGCGGTCATACGTAGGACCCAAGCGTTATCCGGAGTGACTGGGCGTAAAGAGTTGCGTAGGCGGCGTGCTAAGCGAGTAGTGAAAATTATCGGCTCAACCGATAACCTATTATTCGAACTGGCATGCTCGAGAATAGTAGAGGTAGCTGGAATTACTAGTGTAGGAGTGGAATCCGTAGATATTAGTAGGAACACCAATGGCGTAGGCAGGCTACTGGACTATTTCTGACGCTAAG…	Patescibacteria	Saccharimonadia	Saccharimonadales	NA	NA
ACTCCTACGGGAGGCAGCAGTGAGGAATATTGGTCAATGGGGGCAACCCTGAACCAGCCATGCCGCGTGCAGGAAGACGGCTCTATGAGTTGTAAACTGCTTTTATACAGGGATAAATCCATGTACGTGTACGTGGTTGAAGGTACTGTATGAATAAGGATCGGCTAACTCCGTGCCAGCAGCCGCGGTAATACGGAGGATCCAAGCGTTATCCGGATTTATTGGGTTTAAAGGGTGCGTAGGCGGTTTGTTAAGTTAGAGGTGAAATCCGGTGGCTCAACCACCGAACTGCCTCTGATACTGGCAGGCTAGAGATTAGATGCGGTAGGCGGAATGTGTAGTGTAGCGGTGAAATGCTTAGAGATTACACAGAACACCGATTGCGAAGGCAGCTTACCA…	Bacteroidetes	Bacteroidia	Bacteroidales	Rikenellaceae	Alistipes_II
ACTCCTACGGGAGGCAGCAGTGAGGAATATTGGTCAATGGTCGGAAGACTGAACCAGCCAAGTCGCGTGAAGGAAGAAGGATCTATGGTTCGTAAACTTCTTTTATGGGGGAATAAGTATGGGGACGTGTCCCTGTTTATTGCATGTACCCCATGAATAAGCATCGGCTAACTCCGTGCCAGCAGCCGCGGTAATACGGAGGATGCGAGCGTTATCCGGATTTATTGGGTTTAAAGGGTGCGTAGGTGGATGTTTAAGTCCGCGGTGAAAGGTTGTCGCTTAACGATAAAATTGCCGTTGAAACTGGATATCTTGAGTATGTTTGAAGTAGGCGGAATGCGTGGTGTAGCGGTGAAATGCATAGATATCACGCAGAACTCCGATAGCGAAGGCAGCTTA…	Bacteroidetes	Bacteroidia	Bacteroidales	Porphyromonadaceae_3	Tannerella
ACTCCTACGGGAGGCAGCAGTGAGGAATATTCCACAATGGGCGAAAGCCTGATGGAGCAATGCCGCGTGCAGGATGAAGGCCTTCGGGTTGTAAACTGCTTTTATTAGAGAAGAATATGACGGTAACTAATGAATAAGGGTCGGCTAACTACGTGCCAGCAGCCGCGGTCATACGTAGGACCCAAGCGTTATCCGGAGTGACTGGGCGTAAAGAGTTGCGTAGGCGGTTAGATAAGCGAGTGATGAAAACTATCGGCTCAACCGGTAGCCTATTATTCGAACTGTTTAACTCGAGAGTATCAGAGGTCGCTGGAATTCCTTGTGTAGGAGTGAAATCCGTAGATATAAGGAGGAACACCAATGGCGTAGGCAGGCGACTGGGATATTTCTGACGCTAAG…	Patescibacteria	Saccharimonadia	Saccharimonadales	NA	NA
ACTCCTACGGGAGGCAGCAGTGGGGAATATTGCACAATGGACGGAAGTCTGATGCAGCAACGCCGCGTGGAGGATGACACATTTCGGTGCGTAAACTCCTTTTATGTAAGAAGATAATGACGGTATTATATGAATAAGCACCGGCTAACTCCGTGCCAGCAGCCGCGGTAATACGGGGGGTGCAAGCGTTACTCGGAATCACTGGGCGTAAAGAGCGTGTAGGCGGATTGATAAGTTTGAAGTGAAATCCTATAGCTTAACTATAGAACTGCTTTGAAAACTGTTAGTCTAGAATGTGGGAGAGGTAGATGGAATTTCTGGTGTAGGGGTAAAATCCGTAGAGATCAGAAGGAATACCGATTGCGAAGGCGATCTACTGGAACAATATTGACGCTGAGA…	Proteobacteria	Epsilonproteobacteria	Campylobacterales	Campylobacteraceae	Arcobacter
ACTCCTACGGGAGGCAGCAGTGAGGAATATTGGTCAATGGACGCAAGTCTGAACCAGCCATGCCGCGTGCAGGAAGACGGCTCTATGAGTTGTAAACTGCTTTTGTACGAGGGTAAACCCGACTACGTGTAGTCGGCTGAAAGTATCGTACGAATAAGGATCGGCTAACTCCGTGCCAGCAGCCGCGGTAATACGGAGGATCCAAGCGTTATCCGGATTTATTGGGTTTAAAGGGTGCGTAGGCGGTTCGGTAAGTTAGAGGTGAAATTCCGTGGCTCAACCACGGCACTGCCTCTGATACTGCCGGGCTAGAGAATGGTTGCTGTGGGCGGAATGTGTGGTGTAGCGGTGAAATGCTTAGAGATCACACAGAACACCGATTGCGAAGGCAGCTCACAA…	Bacteroidetes	Bacteroidia	Bacteroidales	Rikenellaceae	Alisitpes_IV
ACTCCTACGGGAGGCAGCAGTGGGGAATATTGCACAATGGACGGAAGTCTGATGCAGCAACGCCGCGTGGAGGATGACACATTTCGGTGCGTAAACTCCTTTTATGTAAGAAGATAATGACGGTATTATATGAATAAGCACCGGCTAACTCCGTGCCAGCAGCCGCGGTAATACGGGGGGTGCAAGCGTTACTCGGAATCACTGGGCGTAAAGAGCGTGTAGGCGGATTGATAAGTTTGAAGTGAAATCCTATAGCTTAACTATAGAATTGCTTTGAAAACTGTTAGTCTAGAATGTGGGAGAGGTAGATGGAATTTCTGGTGTAGGGGTAAAATCCGTAGAGATCAGAAGGAATACCGATTGCGAAGGCGATCTACTGGAACAATATTGACGCTGAGA…	Proteobacteria	Epsilonproteobacteria	Campylobacterales	Campylobacteraceae	Arcobacter
ACTCCTACGGGAGGCAGCAGTGGGGAATATTGGACAATGGGCGAAAGCCTGATCCAGCAATGCCGCGTGAGTGATGAAGGCCTTAGGGTTGTAAAGCTCTTTTACCCGGGATGATAATGACAGTACCGGGAGAATAAGCTCCGGCTAACTCCGTGCCAGCAGCCGCGGTAATACGGAGGGAGCTAGCGTTATTCGGAATTACTGGGCGTAAAGCGCACGTAGGCGGCTTTGTAAGTTAGAGGTGAAAGCCTGGAGCTCAACTCCAGAATTGCCTTTAAGACTGCATCGCTTGAATCCAGGAGAGGTGAGTGGAATTCCGAGTGTAGAGGTGAAATTCGTAGATATTCGGAAGAACACCAGTGGCGAAGGCGGCTCACTGGACTGGTATTGACGCTGAGG…	Proteobacteria	Alphaproteobacteria	Sphingomonadales	Sphingomonadaceae	Sphingomonas
ACTCCTACGGGAGGCAGCAGTAAGGAATATTGGGCAATGGACGCAAGTCTGACCCAGCCATGCCGCGTGAAGGAAGACAGCCCTATGGGTTGTAAACTTCTTTTAACAGAGGATAAAGTCGCGTATGTATACGCGTTTGCAGGTATCTGTTGAATAAGCATCGGCTAACTCCGTGCCAGCAGCCGCGGTAATACGGAGGATGCAAGCGTTATCCGGATTCATTGGGTTTAAAGGGTGCGCAGGCGGACTTTTAAGTCAGCGGTGAAATTCCACGGCTCAACCGTGGCGCTGCCGTTGATACTGGGAGTCTTGAGTGTGATTGAGGTGGGCGGAATGTAGCGTGTAGCGGTGAAATGCATAGATATGCTACAGAACACCAATTGCGAAGGCAGCTCACCA…	Bacteroidetes	Sphingobacteria	Sphingobacteriales_1	SB_1	Termite_cluster
ACTCCTACGGGAGGCAGCAGTGGGGAATATTGGGCAATGGGCGAAAGCCTGACCCAGCAACGCCGCGTGAGGGAAGAAGGTTTTCGGATCGTAAACCTCTGTCGCAAGGGACGAGTAGAAGACGGTACCTTGCAAGGAAGCTCCGGCTAACTACGTGCCAGCAGCCGCGGTAATACGTAGGGAGCGAGCGTTGTCCGGAATGACTGGGCGTAAAGGGCGCGTAGGTGGCCCTATAAGTTAGGAGTGAAAGTCCCGCTTTCAAGGTGGGAATTGCTTTTAATACTGTAGGGCTTGAGTGTGGGAGAGGATAGCGGAATTCCCGGTGTAGCGGTGAAATGCGTAGAGATCGGGAGGAACACCAGTGGCGAAGGCGGCTATCTGGACCAAGACTGACACTGA…	Firmicutes	Clostridia_1	Clostridiales	Lachnospiraceae	Gut_cluster_13
ACTCCTACGGGAGGCAGCAGTGAGGAATATTGGTCAATGGTCGGAAGACTGAACCAGCCAAGTCGCGTGAAGGAAGAAGGATCTATGGTTCGTAAACTTCTTTTATGGGGGAATAAGTATGGGGACGTGTCCCTGTTTATTGCATGTACCCCATGAATAAGCATCGGCTAACTCCGTGCCAGCAGCCGCGGTAATACGGAGGATGCGAGCGTTATCCGGATTTATTGGGTTTAAAGGGTGCGTAGGTGGATGTTTAAGTCCGCGGTGAAAGGTTGTCGCTTAACGATAAAATTGCCGTTGAAACTGGATATCTTGAGTATGTTTGAAGTAGGCGGAATGCGTGGTGTAGCGGTGAAATGCATAGATATCACGCAGAACTCCGATAGCGAAGGCAGCTTA…	Bacteroidetes	Bacteroidia	Bacteroidales	Porphyromonadaceae_3	Tannerella
ACTCCTACGGGAGGCAGCAGTGGGGAATATTGGACAATGGGCGAAAGCCTGATCCAGCAATGCCGCGTGAGTGATGAAGGCCTTAGGGTTGTAAAGCTCTTTTACCCGGGATGATAATGACAGTACCGGGAGAATAAGCTCCGGCTAACTCCGTGCCAGCAGCCGCGGTAATACGGAGGGAGCTAGCGTTATTCGGAATTACTGGGCGTAAAGCGCACGTAGGCGGCTTTGTAAGTTAGAGGTGAAAGCCTGGAGCTCAACTCCAGAATTGCCTTTAAGACTGCATCGCTTGAATCCAGGAGAGGTGAGTGGAATTCCGAGTGTAGAGGTGAAATTCGTAGATATTCGGAAGAACACCAGTGGCGAAGGCGGCTCACTGGACTGGTATTGACGCTGAGG…	Proteobacteria	Alphaproteobacteria	Sphingomonadales	Sphingomonadaceae	Sphingomonas
ACTCCTACGGGAGGCAGCAGTGGGGAATATTGCACAATGGGCGCAAGCCTGATGCAGCCATGCCGCGTGTATGAAGAAGGCCTTCGGGTTGTAAAGTACTTTCAGCGGGGAGGAAGGGAGTGTGCTTAATACGCACATTCATTGACGTTACCCGCAGAAGAAGCACCGGCTAACTCCGTGCCAGCAGCCGCGGTAATACGGAGGGTGCAAGCGTTAATCGGAATTACTGGGCGTAAAGCGCACGCAGGCGGTCTGTTAAGTCAGATGTGAAATCCCCGGGCTCAACCCGGGAACTGCATTTGAAACTGGCAGGCTTGAGTCTCGTAGAGGGGGGTGGAATTCCAGGTGTAGCGGTGAAATGCGTAGAGATCTGGAGGAATACCGGTGGCGAAGGCGGCC…	Proteobacteria	Gammaproteobacteria_1	Enterobacteriales	Enterobacteriaceae	Escherichia_blattae_cluster
ACTCCTACGGGAGGCAGCAGTGGGGAATATTGCACAATGGGCGCAAGCCTGATGCAGCCATGCCGCGTGTATGAAGAAGGCCTTCGGGTTGTAAAGTACTTTCAGCGGGGAGGAAGGGAGTGTGCTTAATACGCACATTCATTGACGTTACCCGCAGAAGAAGCACCGGCTAACTCCGTGCCAGCAGCCGCGGTAATACGGAGGGTGCAAGCGTTAATCGGAATTACTGGGCGTAAAGCGCACGCAGGCGGTCTGTTAAGTCAGATGTGAAATCCCCGGGCTCAACCCGGGAACTGCATTTGAAACTGGCAGGCTTGAGTCTCGTAGAGGGGGGTGGAATTCCAGGTGTAGCGGTGAAATGCGTAGAGATCTGGAGGAATACCGGTGGCGAAGGCGGCC…	Proteobacteria	Gammaproteobacteria_1	Enterobacteriales	Enterobacteriaceae	Escherichia_blattae_cluster
ACTCCTACGGGAGGCAGCAGTGGGGGATATTGCACAATGGGCGAAAGCCTGATGCAGCGACGCCGCGTGAGGGAAGAAGGTTTTCGGATTGTAAACCTCTGTCTTCGAGGACGAAGAAGTGACGGTACTCGAGGAGGAAGCCACGGCTAACTACGTGCCAGCAGCCGCGGTAAAACGTAGGTGGCAAGCGTTGTCCGGAATTACTGGGTGTAAAGGGAGCGCAGGCGGGACGATAAGTTGAATGTGAAATGTATGGGCTCAACCCATAGACTGCGTTCAAAACTATCGTTCTTGAGTGATGTAGAGGCAGGCGGAATTCCCGGTGTAGCGGTGGAATGCGTAGATATCGGGAGGAACACCAGTGGCGAAGGCGGCCTGCTGGGCATAAACTGACGCTGA…	Firmicutes	Clostridia_1	Clostridiales	Ruminococcaceae	Termite_cockroach_cluster
ACTCCTACGGGAGGCAGCAGTGGGGAATATTGCACAATGGGGGAAACCCTGATGCAGCAACGCCGCGTGGAGGATGACGCATTTCGGTGTGTAAACTCCTTTTATTTGGGAAGATAATGACGGTACCAAATGAATAAGCACCGGCTAACTCCGTGCCAGCAGCCGCGGTAATACGGAGGGTGCAAGCGTTACTCGGAATCACTGGGCGTAAAGGGTGCGTAGGCGGGTTATCAAGTCTTAAGTGAAATCCAACAGCTTAACTGTTGAACTGCTTAGGAAACTGGCAACCTAGAGTAAGGGAGAGGTAGATGGAATTGGTGGTGTAGGGGTAAAATCCGTAGATATCACCAGGAATACTCATTGCGAAGGCGATCTACTGGAACTTAACTGACGCTGAGG…	Proteobacteria	Epsilonproteobacteria	Campylobacterales	Campylobacteraceae	Sulfurospirillum
ACTCCTACGGGAGGCAGCAGTAAGGAATATTGGGCAATGGACGCAAGTCTGACCCAGCCATGCCGCGTGAAGGAAGACAGCCCTATGGGTTGTAAACTTCTTTTAACAGAGGATAAAGTCGCGTATGTATACGCGTTTGCAGGTATCTGTTGAATAAGCATCGGCTAACTCCGTGCCAGCAGCCGCGGTAATACGGAGGATGCAAGCGTTATCCGGATTCATTGGGTTTAAAGGGTGCGCAGGCGGACTTTTAAGTCAGCGGTGAAATTCCACGGCTCAACCGTGGCGCTGCCGTTGATACTGGGAGTCTTGAGTGTGATTGAGGTGGGCGGAATGTAGCGTGTAGCGGTGAAATGCATAGATATGCTACAGAACACCAATTGCGAAGGCAGCTCACCA…	Bacteroidetes	Sphingobacteria	Sphingobacteriales_1	SB_1	Termite_cluster
ACTCCTACGGGAGGCAGCAGTGAGGAATATTGGTCAATGGACGAGAGTCTGAACCAGCCAAGTAGCGTGAAGGATGACTGCCCTATGGGTTGTAAACTTCTTTTATACGGGAATAAAATGCGGTACGTGTACCGTTTTGTATGTACCGTATGAATAAGGATCGGCTAACTCCGTGCCAGCAGCCGCGGTAATACGGAGGATCCGAGCGTTATCCGGATTTATTGGGTTTAAAGGGAGCGTAGGCGGAAGCTTAAGTCAGTTGTGAAAGTTTGAGGCTCAACCTTAAAATTGCAGTTGAAACTGGGTTTCTTGAGTGCGGCATAGGTGGGCGGAATTCGTGGTGTAGCGGTGAAATGCTTAGATATCACGAAGAACTCCGATTGCGAAGGCAGCTCACTG…	Bacteroidetes	Bacteroidia	Bacteroidales	Porphyromonadaceae_1	Dysgonomonas
ACTCCTACGGGAGGCAGCAGTGGGGGATATTGCACAATGGGCGAAAGCCTGATGCAGCGACGCCGCGTGAGGGAAGAAGGTTTTCGGATTGTAAACCTCTGTCTTCGAGGACGAAGAAGTGACGGTACTCGAGGAGGAAGCCACGGCTAACTACGTGCCAGCAGCCGCGGTAAAACGTAGGTGGCAAGCGTTGTCCGGAATTACTGGGTGTAAAGGGAGCGCAGGCGGGGCGATAAGTTGAATGTGAAATGTATGGGCTCAACCCATAGACTGCGTTCAAAACTATCGTTCTTGAGTGATGTAGAGGCAGGCGGAATTCCCGGTGTAGCGGTGGAATGCGTAGATATCGGGAGGAACACCAGTGGCGAAGGCGGCCTGCTGGGCATAAACTGACGCTGA…	Firmicutes	Clostridia_1	Clostridiales	Ruminococcaceae	Termite_cockroach_cluster
ACTCCTACGGGAGGCAGCAGTGGGGAATATTGCACAATGGGGGAAACCCTGATGCAGCAACGCCGCGTGGAGGATGACGCATTTCGGTGTGTAAACTCCTTTTATTTGGGAAGATAATGACGGTACCAAATGAATAAGCACCGGCTAACTCCGTGCCAGCAGCCGCGGTAATACGGAGGGTGCAAGCGTTACTCGGAATCACTGGGCGTAAAGGGTGCGTAGGCGGGTTATCAAGTCTTAAGTGAAATCCAACAGCTTAACTGTTGAACTGCTTAGGAAACTGGCAACCTAGAGTAAGGGAGAGGTAGATGGAATTGGTGGTGTAGGGGTAAAATCCGTAGATATCACCAGGAATACTCATTGCGAAGGCGATCTACTGGAACTTAACTGACGCTGAGG…	Proteobacteria	Epsilonproteobacteria	Campylobacterales	Campylobacteraceae	Sulfurospirillum
ACTCCTACGGGAGGCAGCAGTAGGGAATCTTCGGCAATGGGCGCAAGCCTGACCGAGCAACGCCGCGTGAGTGAAGAAGGTTTTCGGATCGTAAAGCTCTGTTGATAGAGAAGAACGGGTGAGAGAGTGGAAAATTCTTGCTTTGACGGTATCTATCCAGAAAGGGACGGCTAACTACGTGCCAGCAGCCGCGGTAATACGTAGGTCCCGAGCGTTGTCCGGATTTATTGGGCGTAAAGCGAGCGCAGGTGGTTCTTTAAGTCTGATGTAAAAGGCAGTGGCTCAACCATTGTAGGCATTGGAAACTGGGGAACTTGAGTGCAGTAGAGGAGAGTGGAATTCCATGTGTAGCGGTGAAATGCGTAGATATATGGAGGAACACCGGAGGCGAAAGCGGCT…	Firmicutes	Bacilli	Lactobacillales	Streptococcaceae	Lactococcus_3
ACTCCTACGGGAGGCAGCAGTGGGGAATTTTGGACAATGGGGGCAACCCTGATCCAGCCATGCCGCGTGAGTGAAGAAGGCCTTCGGGTTGTAAAGCTCTTTTGTACGGGAAGAAAAGGTTATTGCTAATATCGATGATACTTGACGGTACCGTAAGAATAAGCACCGGCTAACTACGTGCCAGCAGCCGCGGTAATACGTAGGGTGCAAGCGTTAATCGGAATTACTGGGCGTAAAGCGTGCGCAGGCGGCTTGTTGTGTCTGCTGTGAAATCCCCGGGCTTAACCTGGGAACTGCGGTGGAAACTGGCAAGCTTGAGTGTGGCAGAGGGGGGTGGAATTCCACGTGTAGCAGTGAAATGCGTAGAGATGTGGAGGAACACCGATGGCGAAGGCAGCC…	Proteobacteria	Betaproteobacteria	Rhodocyclales	Rhodocyclaceae_3	Termite_cluster
ACTCCTACGGGAGGCAGCAGTGAGGAATATTGGTCAATGGGGGCAACCCTGAACCAGCCATGCCGCGTGCAGGAAGACGGCTCTATGAGTTGTAAACTGCTTTTATACAGGGATAAATCATGATACGTGTATCATGTTGCAGGTACTGTATGAATAAGGATCGGCTAACTCCGTGCCAGCAGCCGCGGTAATACGGAGGATCCAAGCGTTATCCGGATTTATTGGGTTTAAAGGGTGCGTAGGCGGCACGGTAAGTTAGCGGTGAAATCGCGGGGCTCAACCCCGCAACTGCCGTTAAAACTGCCGAGCTAGAGAGTAGATGCGGTAGGCGGAATGTGTAGTGTAGCGGTGAAATGCTTAGAGATTACACAGAACACCGATTGCGAAGGCAGCTTACCA…	Bacteroidetes	Bacteroidia	Bacteroidales	Rikenellaceae	Alistipes_II
ACTCCTACGGGAGGCAGCAGTGGGGAATATTGGACAATGGGCGAAAGCCTGATCCAGCAATGCCGCGTGAGTGATGAAGGCCTTAGGGTTGTAAAGCTCTTTTACCCGGGATGATAATGACAGTACCGGGAGAATAAGCTCCGGCTAACTCCGTGCCAGCAGCCGCGGTAATACGGAGGGAGCTAGCGTTATTCGGAATTACTGGGCGTAAAGCGCACGTAGGCGGCTTTGTAAGTTAGAGGTGAAAGCCTGGAGCTCAACTCCAGAATTGCCTTTAAGACTGCATCGCTTGAATCCAGGAGAGGTGAGTGGAATTCCGAGTGTAGAGGTGAAATTCGTAGATATTCGGAAGAACACCAGTGGCGAAGGCGGCTCACTGGACTGGTATTGACGCTGAGG…	Proteobacteria	Alphaproteobacteria	Sphingomonadales	Sphingomonadaceae	Sphingomonas
ACTCCTACGGGAGGCAGCAGTGAGGAATATTGGTCAATGGACGCAAGTCTGAACCAGCCATGCCGCGTGCAGGAAGACGGCTCTATGAGTTGTAAACTGCTTTTGTGCGAGGGTAAACCCCCTTACGTGTAAGGGGCTGAAAGTATCGTACGAATAAGGATCGGCTAACTCCGTGCCAGCAGCCGCGGTAATACGGAGGATCCAAGCGTTATCCGGATTTATTGGGTTTAAAGGGTGCGTAGGCGGTTTGTTAAGTTAGAGGTGAAATCCCGTGGCTCAACCACGGAACTGCCTCTGATACTGGCAGGCTAGAGAATGGTTGCTGTGGGCGGAATGTGTGGTGTAGCGGTGAAATGCTTAGAGATCACACAGAACACCGATTGCGAAGGCAGCTCACAA…	Bacteroidetes	Bacteroidia	Bacteroidales	Rikenellaceae	Alisitpes_IV
ACTCCTACGGGAGGCAGCAGTGAGGAATCTTCCACAATGGGCGAAAGCCTGATGGAGCAATGCCGCGTGCAGGATGAAGGCCTTCGGGTTGTAAACTGCTTTTATTAGAGAAGAATATGACGGTAACTAATGAATAAGGGTCGGCTAACTACGTGCCAGCAGCCGCGGTCATACGTAGGACCCAAGCGTTATCCGGAGTGACTGGGCGTAAAGAGTTGCGTAGGCGGCGTGCTAAGCGAGTAGTGAAAATTATCGGCTCAACCGATAACCTATTATTCGAACTGGCATGCTCGAGAATAGTAGAGGTAGCTGGAATTACTAGTGTAGGAGTGGAATCCGTAGATATTAGTAGGAACACCAATGGCGTAGGCAGGCTACTGGACTATTTCTGACGCTAAG…	Patescibacteria	Saccharimonadia	Saccharimonadales	NA	NA
ACTCCTACGGGAGGCAGCAGTGAGGAATATTGGTCAATGGGGGCAACCCTGAACCAGCCATGCCGCGTGCAGGAAGACGGCTCTATGAGTTGTAAACTGCTTTTATACAGGGATAAATCCATGTACGTGTACGTGGTTGAAGGTACTGTATGAATAAGGATCGGCTAACTCCGTGCCAGCAGCCGCGGTAATACGGAGGATCCAAGCGTTATCCGGATTTATTGGGTTTAAAGGGTGCGTAGGCGGTTTGTTAAGTTAGAGGTGAAATCCGGTGGCTCAACCACCGAACTGCCTCTGATACTGGCAGGCTAGAGATTAGATGCGGTAGGCGGAATGTGTAGTGTAGCGGTGAAATGCTTAGAGATTACACAGAACACCGATTGCGAAGGCAGCTTACCA…	Bacteroidetes	Bacteroidia	Bacteroidales	Rikenellaceae	Alistipes_II
ACTCCTACGGGAGGCAGCAGTGAGGAATATTCCACAATGGGCGAAAGCCTGATGGAGCAATGCCGCGTGCAGGATGAAGGCCTTCGGGTTGTAAACTGCTTTTATTAGAGAAGAATATGACGGTAACTAATGAATAAGGGTCGGCTAACTACGTGCCAGCAGCCGCGGTCATACGTAGGACCCAAGCGTTATCCGGAGTGACTGGGCGTAAAGAGTTGCGTAGGCGGTTAGATAAGCGAGTGATGAAAACTATCGGCTCAACCGGTAGCCTATTATTCGAACTGTTTAACTCGAGAGTATCAGAGGTCGCTGGAATTCCTTGTGTAGGAGTGAAATCCGTAGATATAAGGAGGAACACCAATGGCGTAGGCAGGCGACTGGGATATTTCTGACGCTAAG…	Patescibacteria	Saccharimonadia	Saccharimonadales	NA	NA
ACTCCTACGGGAGGCAGCAGTGAGGAATCTTCCACAATGGGCGAAAGCCTGATGGAGCAATGCCGCGTGCAGGATGAAGGCCTTCGGGTTGTAAACTGCTTTTATTAGAGAAGAATATGACGGTAACTAATGAATAAGGGTCGGCTAACTACGTGCCAGCAGCCGCGGTCATACGTAGGACCCAAGCGTTATCCGGAGTGACTGGGCGTAAAGAGTTGCGTAGGCGGCGTGCTAAGCGAGTAGTGAAAATTATCGGCTCAACCGATAACCTATTATTCGAACTGGCATGCTCGAGAATAGTAGAGGTAGCTGGAATTACTAGTGTAGGAGTGGAATCCGTAGATATTAGTAGGAACACCAATGGCGTAGGCAGGCTACTGGACTATTTCTGACGCTAAG…	Patescibacteria	Saccharimonadia	Saccharimonadales	NA	NA
ACTCCTACGGGAGGCAGCAGTGAGGAATATTGGTCAATGGCCGTAAGGCTGAACCAGCCAAGTAGCGTGAAGGATGACGGCCCTATGGGTTGTAAACTTCTTTTATATGGGAATAACGTTACCCACGTGTGGGTATGTGCATGTACCATGTGAATAAGGATCGGCTAACTCCGTGCCAGCAGCCGCGGTAATACGGAGGATCCGAGCGTTATCCGGATTTATTGGGTTTAAAGGGAGCGTAGGCGGGATCTCAAGTCAGCTGTGAAATGTAGATGCTCAACATCTGCACTGCAGTTGAAACTGGTATTCTTGAGTGCGTAAGAGGTAGGCGGAATTCGTCGTGTAGCGGTGAAATGCATAGATATGACGAAGAACTCCGATTGCGAAGGCAGCTTACTG…	Bacteroidetes	Bacteroidia	Bacteroidales	Bacteroidales_UCG-001	NA
ACTCCTACGGGAGGCAGCAGTGGGGAATTTTGGACAATGGGGGCAACCCTGATCCAGCCATGCCGCGTGAGTGAAGAAGGCCTTCGGGTTGTAAAGCTCTTTTGTACGGGAAGAAAAGGTTATTGCTAATATCGATGATACTTGACGGTACCGTAAGAATAAGCACCGGCTAACTACGTGCCAGCAGCCGCGGTAATACGTAGGGTGCAAGCGTTAATCGGAATTACTGGGCGTAAAGCGTGCGCAGGCGGCTTGTTGTGTCTGCTGTGAAATCCCCGGGCTTAACCTGGGAACTGCGGTGGAAACTGGCAAGCTTGAGTGTGGCAGAGGGGGGTGGAATTCCACGTGTAGCAGTGAAATGCGTAGAGATGTGGAGGAACACCGATGGCGAAGGCAGCC…	Proteobacteria	Betaproteobacteria	Rhodocyclales	Rhodocyclaceae_3	Termite_cluster
ACTCCTACGGGAGGCAGCAGTGAGGAATATTGGTCAATGGGGGCAACCCTGAACCAGCCATGCCGCGTGCAGGAAGACGGCTCTATGAGTTGTAAACTGCTTTTGTACAGGGATAAATACATATACGTGTATATGTTTGAAGGTACTGTACGAATAAGGATCGGCTAACTCCGTGCCAGCAGCCGCGGTAATACGGAGGATCCGAGCGTTATCCGGATTTATTGGGTTTAAAGGGTGCGTAGGCGGCGAGGTAAGTTAGAGGTGAAATCCCGTGGCTCAACCACGGAACCGCCTCTGATACTGCTTTGCTAGAGAGTAGATGCGGTAGGCGGAATGTGTAGTGTAGCGGTGAAATGCTTAGAGATTACACAGAACACCGATTGCGAAGGCAGCTTACCA…	Bacteroidetes	Bacteroidia	Bacteroidales	Rikenellaceae	Alistipes_II
ACTCCTACGGGAGGCAGCAGTGGGGAATATTGCACAATGGGCGAAAGCCTGATGCAGCAACGCCGCGTGAGTGATGAAGGTCTTCGGATTGTAAAGCTCTTTGATTAGGGACGATAATGACGGTACCTAAAGAACAAGCCACGGCTAACTACGTGCCAGCAGCCGCGGTAATACGTAGGTGGCAAGCGTTGTCCGGATTTATTGGGCGTAAAGGGAGCGTAGGCGGACCTTTAAGTCAGATGTGAAATACCCAGGGCTCAACCCGGGTGCTGCATTTGATACTGGAGGTCTAGAGTACAGGAGAGGAGAGTGGAATTCCTAGTGTAGCGGTGAAATGCGTAGAGATTAGGAAGAACACCAGTGGCGAAGGCGACTCTCTGGACTGTAACTGACGCTGAG…	Firmicutes	Clostridia_1	Clostridiales	Clostridiaceae_1	Arthropod_cluster
ACTCCTACGGGAGGCAGCAGTGGGGGATATTGCACAATGGGCGAAAGCCTGATGCAGCGACGCCGCGTGAGGGAAGAAGGTTTTCGGATTGTAAACCTCTGTCTTCGAGGACGAAGAAGTGACGGTACTCGAGGAGGAAGCCACGGCTAACTACGTGCCAGCAGCCGCGGTAAAACGTAGGTGGCAAGCGTTGTCCGGAATTACTGGGTGTAAAGGGAGCGCAGGCGGGACGATAAGTTGAATGTGAAATGTATGGGCTCAACCCATAGACTGCGTTCAAAACTATCGTTCTTGAGTGATGTAGAGGCAGGCGGAATTCCCGGTGTAGCGGTGGAATGCGTAGATATCGGGAGGAACACCAGTGGCGAAGGCGGCCTGCTGGGCATAAACTGACGCTGA…	Firmicutes	Clostridia_1	Clostridiales	Ruminococcaceae	Termite_cockroach_cluster
ACTCCTACGGGAGGCAGCAGTAAGGAATATTGGGCAATGGACGCAAGTCTGACCCAGCCATGCCGCGTGAAGGAAGACAGCCCTATGGGTTGTAAACTTCTTTTAACAGAGGATAAAGTCGCGTATGTATACGCGTTTGCAGGTATCTGTTGAATAAGCATCGGCTAACTCCGTGCCAGCAGCCGCGGTAATACGGAGGATGCAAGCGTTATCCGGATTCATTGGGTTTAAAGGGTGCGCAGGCGGACTTTTAAGTCAGCGGTGAAATTCCACGGCTCAACCGTGGCGCTGCCGTTGATACTGGGAGTCTTGAGTGTGATTGAGGTGGGCGGAATGTAGCGTGTAGCGGTGAAATGCATAGATATGCTACAGAACACCAATTGCGAAGGCAGCTCACCA…	Bacteroidetes	Sphingobacteria	Sphingobacteriales_1	SB_1	Termite_cluster
ACTCCTACGGGAGGCAGCAGTGGGGAATATTGCACAATGGGGGAAACCCTGATGCAGCAACGCCGCGTGGAGGATGACGCATTTCGGTGTGTAAACTCCTTTTATTTGGGAAGATAATGACGGTACCAAATGAATAAGCACCGGCTAACTCCGTGCCAGCAGCCGCGGTAATACGGAGGGTGCAAGCGTTACTCGGAATCACTGGGCGTAAAGGGTGCGTAGGCGGGTTATCAAGTCTTAAGTGAAATCCAACAGCTTAACTGTTGAACTGCTTAGGAAACTGGCAACCTAGAGTAAGGGAGAGGTAGATGGAATTGGTGGTGTAGGGGTAAAATCCGTAGATATCACCAGGAATACTCATTGCGAAGGCGATCTACTGGAACTTAACTGACGCTGAGG…	Proteobacteria	Epsilonproteobacteria	Campylobacterales	Campylobacteraceae	Sulfurospirillum
ACTCCTACGGGAGGCAGCAGTGAGGAATATTGGTCAATGGCCGTAAGGCTGAACCAGCCAAGTAGCGTGAAGGATGACGGCCCTATGGGTTGTAAACTTCTTTTATATGGGAATAACGTTACCCACGTGTGGGTATGTGCATGTACCATGTGAATAAGGATCGGCTAACTCCGTGCCAGCAGCCGCGGTAATACGGAGGATCCGAGCGTTATCCGGATTTATTGGGTTTAAAGGGAGCGTAGGCGGGATCTCAAGTCAGCTGTGAAATGTAGATGCTCAACATCTGCACTGCAGTTGAAACTGGTATTCTTGAGTGCGTAAGAGGTAGGCGGAATTCGTCGTGTAGCGGTGAAATGCATAGATATGACGAAGAACTCCGATTGCGAAGGCAGCTTACTG…	Bacteroidetes	Bacteroidia	Bacteroidales	Bacteroidales_UCG-001	NA
ACTCCTACGGGAGGCAGCAGTGGGGGATATTGCACAATGGGCGAAAGCCTGATGCAGCGACGCCGCGTGAGGGAAGAAGGTTTTCGGATTGTAAACCTCTGTCTTCGAGGACGAAGAAGTGACGGTACTCGAGGAGGAAGCCACGGCTAACTACGTGCCAGCAGCCGCGGTAAAACGTAGGTGGCAAGCGTTGTCCGGAATTACTGGGTGTAAAGGGAGCGCAGGCGGGGCGATAAGTTGAATGTGAAATGTATGGGCTCAACCCATAGACTGCGTTCAAAACTATCGTTCTTGAGTGATGTAGAGGCAGGCGGAATTCCCGGTGTAGCGGTGGAATGCGTAGATATCGGGAGGAACACCAGTGGCGAAGGCGGCCTGCTGGGCATAAACTGACGCTGA…	Firmicutes	Clostridia_1	Clostridiales	Ruminococcaceae	Termite_cockroach_cluster
ACTCCTACGGGAGGCAGCAGTGGGGAATATTGCACAATGGACGGAAGTCTGATGCAGCAACGCCGCGTGGAGGATGACACATTTCGGTGCGTAAACTCCTTTTATGTAAGAAGATAATGACGGTATTATATGAATAAGCACCGGCTAACTCCGTGCCAGCAGCCGCGGTAATACGGGGGGTGCAAGCGTTACTCGGAATCACTGGGCGTAAAGAGCGTGTAGGCGGATTGATAAGTTTGAAGTGAAATCCTATAGCTTAACTATAGAACTGCTTTGAAAACTGTTAGTCTAGAATGTGGGAGAGGTAGATGGAATTTCTGGTGTAGGGGTAAAATCCGTAGAGATCAGAAGGAATACCGATTGCGAAGGCGATCTACTGGAACAATATTGACGCTGAGA…	Proteobacteria	Epsilonproteobacteria	Campylobacterales	Campylobacteraceae	Arcobacter
ACTCCTACGGGAGGCAGCAGTAGGGAATCTTCCGCAATGGACGAAAGTCTGACGGAGCAACGCCGCGTGAGTGATGAAGGCTTTCGGGTCGTAAAACTCTGTTGTTAGGGAAGAACAAGTGCTAGTTGAATAAGCTGGCACCTTGACGGTACCTAACCAGAAAGCCACGGCTAACTACGTGCCAGCAGCCGCGGTAATACGTAGGTGGCAAGCGTTATCCGGAATTATTGGGCGTAAAGCGCGCGCAGGTGGTTTCTTAAGTCTGATGTGAAAGCCCACGGCTCAACCGTGGAGGGTCATTGGAAACTGGGAGACTTGAGTGCAGAAGAGGAAAGTGGAATTCCATGTGTAGCGGTGAAATGCGTAGAGATATGGAGGAACACCAGTGGCGAAGGCGAC…	Firmicutes	Bacilli	Bacillales	Bacillaceae	Bacillus
ACTCCTACGGGAGGCAGCAGTGGGGAATATTGCACAATGGACGGAAGTCTGATGCAGCAACGCCGCGTGGAGGATGACACATTTCGGTGCGTAAACTCCTTTTATGTAAGAAGATAATGACGGTATTATATGAATAAGCACCGGCTAACTCCGTGCCAGCAGCCGCGGTAATACGGGGGGTGCAAGCGTTACTCGGAATCACTGGGCGTAAAGAGCGTGTAGGCGGATTGATAAGTTTGAAGTGAAATCCTATAGCTTAACTATAGAATTGCTTTGAAAACTGTTAGTCTAGAATGTGGGAGAGGTAGATGGAATTTCTGGTGTAGGGGTAAAATCCGTAGAGATCAGAAGGAATACCGATTGCGAAGGCGATCTACTGGAACAATATTGACGCTGAGA…	Proteobacteria	Epsilonproteobacteria	Campylobacterales	Campylobacteraceae	Arcobacter
ACTCCTACGGGAGGCAGCAGTGGGGAATATTGCACAATGGGGGAAACCCTGATGCAGCGACGCCGCGTGAGTGAAGAAGTATTTCGGTATGTAAAGCTCTATCAGCAGGGAAGAAAATGACGGTACCTGACTAAGAAGCCCCGGCTAACTACGTGCCAGCAGCCGCGGTAATACGTAGGGGGCAAGCGTTATCCGGATTTACTGGGTGTAAAGGGAGCGTAGACGGCATGGTAAGTCTGAAGTGAAAGCCCGGGGCTCAACCCCGTGGACTGCTTTGGAAACTGTCAGGCTAGAGTGCAGGAGAGGTAAGTGGAATTCCTAGTGTAGCGGTGGAATGCGTAGATATTAGGAGGAACACCAGTGGCGAAGGCGGCTTACTGGACTGTAACTGACGTTGAG…	Firmicutes	Clostridia	Clostridiales	Lachnospiraceae	NA
ACTCCTACGGGAGGCAGCAGTGGGGAATATTGCACAATGGGCGCAAGCCTGATGCAGCCATGCCGCGTGTATGAAGAAGGCCTTCGGGTTGTAAAGTACTTTCAGCGGGGAGGAAGGGAGTGTGCTTAATACGCACATTCATTGACGTTACCCGCAGAAGAAGCACCGGCTAACTCCGTGCCAGCAGCCGCGGTAATACGGAGGGTGCAAGCGTTAATCGGAATTACTGGGCGTAAAGCGCACGCAGGCGGTCTGTTAAGTCAGATGTGAAATCCCCGGGCTCAACCCGGGAACTGCATTTGAAACTGGCAGGCTTGAGTCTCGTAGAGGGGGGTGGAATTCCAGGTGTAGCGGTGAAATGCGTAGAGATCTGGAGGAATACCGGTGGCGAAGGCGGCC…	Proteobacteria	Gammaproteobacteria_1	Enterobacteriales	Enterobacteriaceae	Escherichia_blattae_cluster
ACTCCTACGGGAGGCAGCAGTGAGGAATATTGGTCAATGGACGCAAGTCTGAACCAGCCATGCCGCGTGCAGGAAGACGGCTCTATGAGTTGTAAACTGCTTTTGTACGAGGGTAAACCCTGATACGTGTATCAGGCTGAAAGTATCGTACGAATAAGGATCGGCTAACTCCGTGCCAGCAGCCGCGGTAATACGGAGGATCCAAGCGTTATCCGGATTTATTGGGTTTAAAGGGTGCGTAGGCGGTTTGTTAAGTTAGAGGTGAAATTCCGTGGCTCAACCACGGCACTGCCTCTGATACTGGCAGGCTAGAGAATGGTTGCTGTGGGCGGAATGTGTGGTGTAGCGGTGAAATGCTTAGAGATCACACAGAACACCGATTGCGAAGGCAGCTCACAA…	Bacteroidetes	Bacteroidia	Bacteroidales	Rikenellaceae	Alisitpes_IV
ACTCCTACGGGAGGCAGCAGTGAGGAATATTGGTCAATGGACGCAAGTCTGAACCAGCCATGCCGCGTGCAGGAAGACGGCTCTATGAGTTGTAAACTGCTTTTGTACGAGGGTAAACCCGACTACGTGTAGTCGGCTGAAAGTATCGTACGAATAAGGATCGGCTAACTCCGTGCCAGCAGCCGCGGTAATACGGAGGATCCAAGCGTTATCCGGATTTATTGGGTTTAAAGGGTGCGTAGGCGGTTCGGTAAGTTAGAGGTGAAATTCCGTGGCTCAACCACGGCACTGCCTCTGATACTGCCGGGCTAGAGAATGGTTGCTGTGGGCGGAATGTGTGGTGTAGCGGTGAAATGCTTAGAGATCACACAGAACACCGATTGCGAAGGCAGCTCACAA…	Bacteroidetes	Bacteroidia	Bacteroidales	Rikenellaceae	Alisitpes_IV
ACTCCTACGGGAGGCAGCAGTGGGGGATATTGCACAATGGGCGAAAGCCTGATGCAGCGACGCCGCGTGAGGGAAGAAGGTTTTCGGATTGTAAACCTCTGTCTTCGAGGACGAAGAAGTGACGGTACTCGAGGAGGAAGCCACGGCTAACTACGTGCCAGCAGCCGCGGTAAAACGTAGGTGGCAAGCGTTGTCCGGAATTACTGGGTGTAAAGGGAGCGCAGGCGGGACGATAAGTTGAATGTGAAATGTATGGGCTCAACCCATAGACTGCGTTCAAAACTATCGTTCTTGAGTGATGTAGAGGCAGGCGGAATTCCCGGTGTAGCGGTGGAATGCGTAGATATCGGGAGGAACACCAGTGGCGAAGGCGGCCTGCTGGGCATAAACTGACGCTGA…	Firmicutes	Clostridia_1	Clostridiales	Ruminococcaceae	Termite_cockroach_cluster
ACTCCTACGGGAGGCAGCAGTGGGGAATATTGGGCAATGGGCGAAAGCCTGACCCAGCAACGCCGCGTGAAGGAAGAAGGTTTTCGGATCGTAAACTTCTATCCCGGGTGAAGATAATGACGGTAGCCCGGAAGGAAGCCCCGGCTAACTACGTGCCAGCAGCCGCGGTAATACGTAGGGGGCAAGCGTTGTCCGGAATGATTGGGCGTAAAGGGCGCGTAGGCGGCTCTGTAAGTCTGGAGTGAAAGTCCTGCTTTTAAGGTGGGAATTGCTTTGGAAACTGTGGAGCTTGAGTGCAGGAGAGGTTAGCGGAATTCCCGGTGTAGCGGTGAAATGCGTAGAGATCGGGAGGAACACCAGTGGCGAAGGCGGCTAACTGGACTGTAACTGACGCTGAGG…	Firmicutes	Clostridia_1	Clostridiales	Lachnospiraceae	Gut_cluster_13
ACTCCTACGGGAGGCAGCAGTGAGGAATATTCCACAATGGGCGAAAGCCTGATGGAGCAATGCCGCGTGCAGGATGAAGGCCTTCGGGTTGTAAACTGCTTTTATTAGAGAAGAATATGACGGTAACTAATGAATAAGGGTCGGCTAACTACGTGCCAGCAGCCGCGGTCATACGTAGGACCCAAGCGTTATCCGGAGTGACTGGGCGTAAAGAGTTGCGTAGGCGGTTAGATAAGCGAGTGATGAAAACTATCGGCTCAACCGGTAGCCTATTATTCGAACTGTTTAACTCGAGAGTATCAGAGGTCGCTGGAATTCCTTGTGTAGGAGTGAAATCCGTAGATATAAGGAGGAACACCAATGGCGTAGGCAGGCGACTGGGATATTTCTGACGCTAAG…	Patescibacteria	Saccharimonadia	Saccharimonadales	NA	NA
ACTCCTACGGGAGGCAGCAGTGGGGGATATTGCACAATGGGCGAAAGCCTGATGCAGCGACGCCGCGTGAGGGAAGAAGGTTTTCGGATTGTAAACCTCTGTCTTCGAGGACGAAGAAGTGACGGTACTCGAGGAGGAAGCCACGGCTAACTACGTGCCAGCAGCCGCGGTAAAACGTAGGTGGCAAGCGTTGTCCGGAATTACTGGGTGTAAAGGGAGCGCAGGCGGGGCGATAAGTTGAATGTGAAATGTATGGGCTCAACCCATAGACTGCGTTCAAAACTATCGTTCTTGAGTGATGTAGAGGCAGGCGGAATTCCCGGTGTAGCGGTGGAATGCGTAGATATCGGGAGGAACACCAGTGGCGAAGGCGGCCTGCTGGGCATAAACTGACGCTGA…	Firmicutes	Clostridia_1	Clostridiales	Ruminococcaceae	Termite_cockroach_cluster
ACTCCTACGGGAGGCAGCAGTGAGGAATATTGGTCAATGGACGCAAGTCTGAACCAGCCATGCCGCGTGCAGGAAGACGGCTCTATGAGTTGTAAACTGCTTTTGTACGAGGGTAAACCCGACTACGTGTAGTCGGCTGAAAGTATCGTACGAATAAGGATCGGCTAACTCCGTGCCAGCAGCCGCGGTAATACGGAGGATCCAAGCGTTATCCGGATTTATTGGGTTTAAAGGGTGCGTAGGCGGTTCGGTAAGTTAGAGGTGAAATTCCGTGGCTCAACCACGGCACTGCCTCTGATACTGCCGGGCTAGAGAATGGTTGCTGTGGGCGGAATGTGTGGTGTAGCGGTGAAATGCTTAGAGATCACACAGAACACCGATTGCGAAGGCAGCTCACAA…	Bacteroidetes	Bacteroidia	Bacteroidales	Rikenellaceae	Alisitpes_IV
ACTCCTACGGGAGGCAGCAGTGAGGAATCTTCCACAATGGGCGAAAGCCTGATGGAGCAATGCCGCGTGCAGGATGAAGGCCTTCGGGTTGTAAACTGCTTTTATTAGAGAAGAATATGACGGTAACTAATGAATAAGGGTCGGCTAACTACGTGCCAGCAGCCGCGGTCATACGTAGGACCCAAGCGTTATCCGGAGTGACTGGGCGTAAAGAGTTGCGTAGGCGGCGTGCTAAGCGAGTAGTGAAAATTATCGGCTCAACCGATAACCTATTATTCGAACTGGCATGCTCGAGAATAGTAGAGGTAGCTGGAATTACTAGTGTAGGAGTGGAATCCGTAGATATTAGTAGGAACACCAATGGCGTAGGCAGGCTACTGGACTATTTCTGACGCTAAG…	Patescibacteria	Saccharimonadia	Saccharimonadales	NA	NA
ACTCCTACGGGAGGCAGCAGTGAGGAATATTGGTCAATGGGGGCAACCCTGAACCAGCCATGCCGCGTGCAGGAAGACGGCTCTATGAGTTGTAAACTGCTTTTGTACAGGGATAAATACATATACGTGTATATGTTTGAAGGTACTGTACGAATAAGGATCGGCTAACTCCGTGCCAGCAGCCGCGGTAATACGGAGGATCCGAGCGTTATCCGGATTTATTGGGTTTAAAGGGTGCGTAGGCGGCGAGGTAAGTTAGAGGTGAAATCCCGTGGCTCAACCACGGAACCGCCTCTGATACTGCTTTGCTAGAGAGTAGATGCGGTAGGCGGAATGTGTAGTGTAGCGGTGAAATGCTTAGAGATTACACAGAACACCGATTGCGAAGGCAGCTTACCA…	Bacteroidetes	Bacteroidia	Bacteroidales	Rikenellaceae	Alistipes_II
ACTCCTACGGGAGGCAGCAGTGGGGAATTTTGGACAATGGGGGCAACCCTGATCCAGCCATGCCGCGTGAGTGAAGAAGGCCTTCGGGTTGTAAAGCTCTTTTGTACGGGAAGAAAAGGTTATTGCTAATATCGATGATACTTGACGGTACCGTAAGAATAAGCACCGGCTAACTACGTGCCAGCAGCCGCGGTAATACGTAGGGTGCAAGCGTTAATCGGAATTACTGGGCGTAAAGCGTGCGCAGGCGGCTTGTTGTGTCTGCTGTGAAATCCCCGGGCTTAACCTGGGAACTGCGGTGGAAACTGGCAAGCTTGAGTGTGGCAGAGGGGGGTGGAATTCCACGTGTAGCAGTGAAATGCGTAGAGATGTGGAGGAACACCGATGGCGAAGGCAGCC…	Proteobacteria	Betaproteobacteria	Rhodocyclales	Rhodocyclaceae_3	Termite_cluster
ACTCCTACGGGAGGCAGCAGTGGGGAATATTGGACAATGGGCGAAAGCCTGATCCAGCAATGCCGCGTGAGTGATGAAGGCCTTAGGGTTGTAAAGCTCTTTTACCCGGGATGATAATGACAGTACCGGGAGAATAAGCTCCGGCTAACTCCGTGCCAGCAGCCGCGGTAATACGGAGGGAGCTAGCGTTATTCGGAATTACTGGGCGTAAAGCGCACGTAGGCGGCTTTGTAAGTTAGAGGTGAAAGCCTGGAGCTCAACTCCAGAATTGCCTTTAAGACTGCATCGCTTGAATCCAGGAGAGGTGAGTGGAATTCCGAGTGTAGAGGTGAAATTCGTAGATATTCGGAAGAACACCAGTGGCGAAGGCGGCTCACTGGACTGGTATTGACGCTGAGG…	Proteobacteria	Alphaproteobacteria	Sphingomonadales	Sphingomonadaceae	Sphingomonas
ACTCCTACGGGAGGCAGCAGTAGGGAATCTTCCGCAATGGACGAAAGTCTGACGGAGCAACGCCGCGTGAGTGATGAAGGCTTTCGGGTCGTAAAACTCTGTTGTTAGGGAAGAACAAGTGCTAGTTGAATAAGCTGGCACCTTGACGGTACCTAACCAGAAAGCCACGGCTAACTACGTGCCAGCAGCCGCGGTAATACGTAGGTGGCAAGCGTTATCCGGAATTATTGGGCGTAAAGCGCGCGCAGGTGGTTTCTTAAGTCTGATGTGAAAGCCCACGGCTCAACCGTGGAGGGTCATTGGAAACTGGGAGACTTGAGTGCAGAAGAGGAAAGTGGAATTCCATGTGTAGCGGTGAAATGCGTAGAGATATGGAGGAACACCAGTGGCGAAGGCGAC…	Firmicutes	Bacilli	Bacillales	Bacillaceae	Bacillus
ACTCCTACGGGAGGCAGCAGTGAGGAATCTTCCACAATGGGCGAAAGCCTGATGGAGCAATGCCGCGTGCAGGATGAAGGCCTTCGGGTTGTAAACTGCTTTTATTAGAGAAGAATATGACGGTAACTAATGAATAAGGGTCGGCTAACTACGTGCCAGCAGCCGCGGTCATACGTAGGACCCAAGCGTTATCCGGAGTGACTGGGCGTAAAGAGTTGCGTAGGCGGCGTGCTAAGCGAGTAGTGAAAATTATCGGCTCAACCGATAACCTATTATTCGAACTGGCATGCTCGAGAATAGTAGAGGTAGCTGGAATTACTAGTGTAGGAGTGGAATCCGTAGATATTAGTAGGAACACCAATGGCGTAGGCAGGCTACTGGACTATTTCTGACGCTAAG…	Patescibacteria	Saccharimonadia	Saccharimonadales	NA	NA
ACTCCTACGGGAGGCAGCAGTGAGGAATATTGGTCAATGGGGGCAACCCTGAACCAGCCATGCCGCGTGCAGGAAGACGGCTCTATGAGTTGTAAACTGCTTTTATACGGGGATAAATCAGAGCACGCGTGCTCTGTTGAAGGTACCGTAAGAATAAGGATCGGCTAACTCCGTGCCAGCAGCCGCGGTAATACGGAGGATCCAAGCGTTATCCGGATTTATTGGGTTTAAAGGGTGCGTAGGCGGCACGGTAAGTTAGCGGTGAAATCTCGGGGCTTAACCCCGAAATTGCCGTTAAAACTGCCGGGCTAGAGATTAGATGCGGTAGGCGGAATGTGTGGTGTAGCGGTGAAATGCTTAGAGATCACACAGAACCCCGATTGCGAAGGCAGCTTACCA…	Bacteroidetes	Bacteroidia	Bacteroidales	Rikenellaceae	Alistipes_II
ACTCCTACGGGAGGCAGCAGTGGGGAATATTGGACAATGGGCGAAAGCCTGATCCAGCAATGCCGCGTGAGTGATGAAGGCCTTAGGGTTGTAAAGCTCTTTTACCCGGGATGATAATGACAGTACCGGGAGAATAAGCTCCGGCTAACTCCGTGCCAGCAGCCGCGGTAATACGGAGGGAGCTAGCGTTATTCGGAATTACTGGGCGTAAAGCGCACGTAGGCGGCTTTGTAAGTTAGAGGTGAAAGCCTGGAGCTCAACTCCAGAATTGCCTTTAAGACTGCATCGCTTGAATCCAGGAGAGGTGAGTGGAATTCCGAGTGTAGAGGTGAAATTCGTAGATATTCGGAAGAACACCAGTGGCGAAGGCGGCTCACTGGACTGGTATTGACGCTGAGG…	Proteobacteria	Alphaproteobacteria	Sphingomonadales	Sphingomonadaceae	Sphingomonas
ACTCCTACGGGAGGCAGCAGTGAGGAATCTTCCACAATGGGCGAAAGCCTGATGGAGCAATGCCGCGTGCAGGATGAAGGCCTTCGGGTTGTAAACTGCTTTTATTAGAGAAGAATATGACGGTAACTAATGAATAAGGGTCGGCTAACTACGTGCCAGCAGCCGCGGTCATACGTAGGACCCAAGCGTTATCCGGAGTGACTGGGCGTAAAGAGTTGCGTAGGCGGCGTGCTAAGCGAGTAGTGAAAATTATCGGCTCAACCGATAACCTATTATTCGAACTGGCATGCTCGAGAATAGTAGAGGTAGCTGGAATTACTAGTGTAGGAGTGGAATCCGTAGATATTAGTAGGAACACCAATGGCGTAGGCAGGCTACTGGACTATTTCTGACGCTAAG…	Patescibacteria	Saccharimonadia	Saccharimonadales	NA	NA
ACTCCTACGGGAGGCAGCAGTGGGGAATATTGCACAATGGGGGAAACCCTGATGCAGCAACGCCGCGTGGAGGATGACGCATTTCGGTGTGTAAACTCCTTTTATTTGGGAAGATAATGACGGTACCAAATGAATAAGCACCGGCTAACTCCGTGCCAGCAGCCGCGGTAATACGGAGGGTGCAAGCGTTACTCGGAATCACTGGGCGTAAAGGGTGCGTAGGCGGGTTATCAAGTCTTAAGTGAAATCCAACAGCTTAACTGTTGAACTGCTTAGGAAACTGGCAACCTAGAGTAAGGGAGAGGTAGATGGAATTGGTGGTGTAGGGGTAAAATCCGTAGATATCACCAGGAATACTCATTGCGAAGGCGATCTACTGGAACTTAACTGACGCTGAGG…	Proteobacteria	Epsilonproteobacteria	Campylobacterales	Campylobacteraceae	Sulfurospirillum
ACTCCTACGGGAGGCAGCAGTGGGGGATATTGCACAATGGGCGAAAGCCTGATGCAGCGACGCCGCGTGAGGGAAGAAGGTTTTCGGATTGTAAACCTCTGTCTTCGAGGACGAAGAAGTGACGGTACTCGAGGAGGAAGCCACGGCTAACTACGTGCCAGCAGCCGCGGTAAAACGTAGGTGGCAAGCGTTGTCCGGAATTACTGGGTGTAAAGGGAGCGCAGGCGGGACGATAAGTTGAATGTGAAATGTATGGGCTCAACCCATAGACTGCGTTCAAAACTATCGTTCTTGAGTGATGTAGAGGCAGGCGGAATTCCCGGTGTAGCGGTGGAATGCGTAGATATCGGGAGGAACACCAGTGGCGAAGGCGGCCTGCTGGGCATAAACTGACGCTGA…	Firmicutes	Clostridia_1	Clostridiales	Ruminococcaceae	Termite_cockroach_cluster
ACTCCTACGGGAGGCAGCAGTGAGGAATATTGGTCAATGGGGGCAACCCTGAACCAGCCATGCCGCGTGCAGGAAGACGGCTCTATGAGTTGTAAACTGCTTTTGTACAGGGATAAATACATATACGTGTATATGTTTGAAGGTACTGTACGAATAAGGATCGGCTAACTCCGTGCCAGCAGCCGCGGTAATACGGAGGATCCGAGCGTTATCCGGATTTATTGGGTTTAAAGGGTGCGTAGGCGGCGAGGTAAGTTAGAGGTGAAATCCCGTGGCTCAACCACGGAACCGCCTCTGATACTGCTTTGCTAGAGAGTAGATGCGGTAGGCGGAATGTGTAGTGTAGCGGTGAAATGCTTAGAGATTACACAGAACACCGATTGCGAAGGCAGCTTACCA…	Bacteroidetes	Bacteroidia	Bacteroidales	Rikenellaceae	Alistipes_II
ACTCCTACGGGAGGCAGCAGTGAGGAATATTGGTCAATGGGGGCAACCCTGAACCAGCCATGCCGCGTGCAGGAAGACGGCTCTATGAGTTGTAAACTGCTTTTATACAGGGATAAATCATGATACGTGTATCATGTTGCAGGTACTGTATGAATAAGGATCGGCTAACTCCGTGCCAGCAGCCGCGGTAATACGGAGGATCCAAGCGTTATCCGGATTTATTGGGTTTAAAGGGTGCGTAGGCGGCACGGTAAGTTAGCGGTGAAATCGCGGGGCTCAACCCCGCAACTGCCGTTAAAACTGCCGAGCTAGAGAGTAGATGCGGTAGGCGGAATGTGTAGTGTAGCGGTGAAATGCTTAGAGATTACACAGAACACCGATTGCGAAGGCAGCTTACCA…	Bacteroidetes	Bacteroidia	Bacteroidales	Rikenellaceae	Alistipes_II
ACTCCTACGGGAGGCAGCAGTAAGGAATATTGGGCAATGGACGCAAGTCTGACCCAGCCATGCCGCGTGAAGGAAGACAGCCCTATGGGTTGTAAACTTCTTTTAACAGAGGATAAAGTCGCGTATGTATACGCGTTTGCAGGTATCTGTTGAATAAGCATCGGCTAACTCCGTGCCAGCAGCCGCGGTAATACGGAGGATGCAAGCGTTATCCGGATTCATTGGGTTTAAAGGGTGCGCAGGCGGACTTTTAAGTCAGCGGTGAAATTCCACGGCTCAACCGTGGCGCTGCCGTTGATACTGGGAGTCTTGAGTGTGATTGAGGTGGGCGGAATGTAGCGTGTAGCGGTGAAATGCATAGATATGCTACAGAACACCAATTGCGAAGGCAGCTCACCA…	Bacteroidetes	Sphingobacteria	Sphingobacteriales_1	SB_1	Termite_cluster
ACTCCTACGGGAGGCAGCAGTGGGGAATATTGCACAATGGGCGCAAGCCTGATGCAGCCATGCCGCGTGTATGAAGAAGGCCTTCGGGTTGTAAAGTACTTTCAGCGGGGAGGAAGGGAGTGTGCTTAATACGCACATTCATTGACGTTACCCGCAGAAGAAGCACCGGCTAACTCCGTGCCAGCAGCCGCGGTAATACGGAGGGTGCAAGCGTTAATCGGAATTACTGGGCGTAAAGCGCACGCAGGCGGTCTGTTAAGTCAGATGTGAAATCCCCGGGCTCAACCCGGGAACTGCATTTGAAACTGGCAGGCTTGAGTCTCGTAGAGGGGGGTGGAATTCCAGGTGTAGCGGTGAAATGCGTAGAGATCTGGAGGAATACCGGTGGCGAAGGCGGCC…	Proteobacteria	Gammaproteobacteria_1	Enterobacteriales	Enterobacteriaceae	Escherichia_blattae_cluster
ACTCCTACGGGAGGCAGCAGTAAGGAATATTGGGCAATGGACGCAAGTCTGACCCAGCCATGCCGCGTGAAGGAAGACAGCCCTATGGGTTGTAAACTTCTTTTAACAGAGGATAAAGTCGCGTATGTATACGCGTTTGCAGGTATCTGTTGAATAAGCATCGGCTAACTCCGTGCCAGCAGCCGCGGTAATACGGAGGATGCAAGCGTTATCCGGATTCATTGGGTTTAAAGGGTGCGCAGGCGGACTTTTAAGTCAGCGGTGAAATTCCACGGCTCAACCGTGGCGCTGCCGTTGATACTGGGAGTCTTGAGTGTGATTGAGGTGGGCGGAATGTAGCGTGTAGCGGTGAAATGCATAGATATGCTACAGAACACCAATTGCGAAGGCAGCTCACCA…	Bacteroidetes	Sphingobacteria	Sphingobacteriales_1	SB_1	Termite_cluster
ACTCCTACGGGAGGCAGCAGTGGGGAATATTGGACAATGGGCGAAAGCCTGATCCAGCAATGCCGCGTGAGTGATGAAGGCCTTAGGGTTGTAAAGCTCTTTTACCCGGGATGATAATGACAGTACCGGGAGAATAAGCTCCGGCTAACTCCGTGCCAGCAGCCGCGGTAATACGGAGGGAGCTAGCGTTATTCGGAATTACTGGGCGTAAAGCGCACGTAGGCGGCTTTGTAAGTTAGAGGTGAAAGCCTGGAGCTCAACTCCAGAATTGCCTTTAAGACTGCATCGCTTGAATCCAGGAGAGGTGAGTGGAATTCCGAGTGTAGAGGTGAAATTCGTAGATATTCGGAAGAACACCAGTGGCGAAGGCGGCTCACTGGACTGGTATTGACGCTGAGG…	Proteobacteria	Alphaproteobacteria	Sphingomonadales	Sphingomonadaceae	Sphingomonas
ACTCCTACGGGAGGCAGCAGTGAGGAATATTGGTCAATGGACGCAAGTCTGAACCAGCCATGCCGCGTGCAGGAAGACGGCTCTATGAGTTGTAAACTGCTTTTGTACGAGGGTAAACCCTGATACGTGTATCAGGCTGAAAGTATCGTACGAATAAGGATCGGCTAACTCCGTGCCAGCAGCCGCGGTAATACGGAGGATCCAAGCGTTATCCGGATTTATTGGGTTTAAAGGGTGCGTAGGCGGTTTGTTAAGTTAGAGGTGAAATCCCGTGGCTCAACCACGGAACTGCCTCTGATACTGGCAGGCTAGAGAATGGTTGCTGTGGGCGGAATGTGTGGTGTAGCGGTGAAATGCTTAGAGATCACACAGAACACCGATTGCGAAGGCAGCTCACAA…	Bacteroidetes	Bacteroidia	Bacteroidales	Rikenellaceae	Alisitpes_IV
ACTCCTACGGGAGGCAGCAGTGGGGAATATTGCACAATGGGGGAAACCCTGATGCAGCAACGCCGCGTGGAGGATGACGCATTTCGGTGTGTAAACTCCTTTTATTTGGGAAGATAATGACGGTACCAAATGAATAAGCACCGGCTAACTCCGTGCCAGCAGCCGCGGTAATACGGAGGGTGCAAGCGTTACTCGGAATCACTGGGCGTAAAGGGTGCGTAGGCGGGTTATCAAGTCTTAAGTGAAATCCAACAGCTTAACTGTTGAACTGCTTAGGAAACTGGCAACCTAGAGTAAGGGAGAGGTAGATGGAATTGGTGGTGTAGGGGTAAAATCCGTAGATATCACCAGGAATACTCATTGCGAAGGCGATCTACTGGAACTTAACTGACGCTGAGG…	Proteobacteria	Epsilonproteobacteria	Campylobacterales	Campylobacteraceae	Sulfurospirillum
ACTCCTACGGGAGGCAGCAGTGGGGGATATTGCACAATGGGCGAAAGCCTGATGCAGCGACGCCGCGTGAGGGAAGAAGGTTTTCGGATTGTAAACCTCTGTCTTCGAGGACGAAGAAGTGACGGTACTCGAGGAGGAAGCCACGGCTAACTACGTGCCAGCAGCCGCGGTAAAACGTAGGTGGCAAGCGTTGTCCGGAATTACTGGGTGTAAAGGGAGCGCAGGCGGGGCGATAAGTTGAATGTGAAATGTATGGGCTCAACCCATAGACTGCGTTCAAAACTATCGTTCTTGAGTGATGTAGAGGCAGGCGGAATTCCCGGTGTAGCGGTGGAATGCGTAGATATCGGGAGGAACACCAGTGGCGAAGGCGGCCTGCTGGGCATAAACTGACGCTGA…	Firmicutes	Clostridia_1	Clostridiales	Ruminococcaceae	Termite_cockroach_cluster
ACTCCTACGGGAGGCAGCAGTGGGGAATATTGCACAATGGGCGCAAGCCTGATGCAGCCATGCCGCGTGTATGAAGAAGGCCTTCGGGTTGTAAAGTACTTTCAGCGGGGAGGAAGGGAGTGTGCTTAATACGCACATTCATTGACGTTACCCGCAGAAGAAGCACCGGCTAACTCCGTGCCAGCAGCCGCGGTAATACGGAGGGTGCAAGCGTTAATCGGAATTACTGGGCGTAAAGCGCACGCAGGCGGTCTGTTAAGTCAGATGTGAAATCCCCGGGCTCAACCCGGGAACTGCATTTGAAACTGGCAGGCTTGAGTCTCGTAGAGGGGGGTGGAATTCCAGGTGTAGCGGTGAAATGCGTAGAGATCTGGAGGAATACCGGTGGCGAAGGCGGCC…	Proteobacteria	Gammaproteobacteria_1	Enterobacteriales	Enterobacteriaceae	Escherichia_blattae_cluster
ACTCCTACGGGAGGCAGCAGTAAGGAATATTGGGCAATGGACGCAAGTCTGACCCAGCCATGCCGCGTGAAGGAAGACAGCCCTATGGGTTGTAAACTTCTTTTAACAGAGGATAAAGTCGCGTATGTATACGCGTTTGCAGGTATCTGTTGAATAAGCATCGGCTAACTCCGTGCCAGCAGCCGCGGTAATACGGAGGATGCAAGCGTTATCCGGATTCATTGGGTTTAAAGGGTGCGCAGGCGGACTTTTAAGTCAGCGGTGAAATTCCACGGCTCAACCGTGGCGCTGCCGTTGATACTGGGAGTCTTGAGTGTGATTGAGGTGGGCGGAATGTAGCGTGTAGCGGTGAAATGCATAGATATGCTACAGAACACCAATTGCGAAGGCAGCTCACCA…	Bacteroidetes	Sphingobacteria	Sphingobacteriales_1	SB_1	Termite_cluster
ACTCCTACGGGAGGCAGCAGTGGGGGATATTGCACAATGGGCGAAAGCCTGATGCAGCGACGCCGCGTGAGGGAAGAAGGTTTTCGGATTGTAAACCTCTGTCTTCGGGGACGATAATGACGGTACCCGAGGAGGAAGCCACGGCTAACTACGTGCCAGCAGCCGCGGTAAAACGTAGGTGGCAAGCGTTGTCCGGAATTACTGGGTGTAAAGGGAGCGCAGGCGGGGTGCCAAGTTGGGCGTGAAAACTATGGGCTCAACCCATAGATTGCGCTCAAAACTGGCGCTCTTGAGTGATGGAGAGGCAGGCGGAATTCCCGGTGTAGCGGTGGAATGCGTAGATATCGGGAGGAACACCAGTGGCGAAGGCGGCCTGCTGGACATTAACTGACGCTGAGG…	Firmicutes	Clostridia_1	Clostridiales	Ruminococcaceae	Termite_cockroach_cluster
ACTCCTACGGGAGGCAGCAGTGAGGAATATTGGTCAATGGGGGCAACCCTGAACCAGCCATGCCGCGTGCAGGAAGACGGCTCTATGAGTTGTAAACTGCTTTTGTACAGGGATAAATACATATACGTGTATATGTTTGAAGGTACTGTACGAATAAGGATCGGCTAACTCCGTGCCAGCAGCCGCGGTAATACGGAGGATCCGAGCGTTATCCGGATTTATTGGGTTTAAAGGGTGCGTAGGCGGCGAGGTAAGTTAGAGGTGAAATCCCGTGGCTCAACCACGGAACCGCCTCTGATACTGCTTTGCTAGAGAGTAGATGCGGTAGGCGGAATGTGTAGTGTAGCGGTGAAATGCTTAGAGATTACACAGAACACCGATTGCGAAGGCAGCTTACCA…	Bacteroidetes	Bacteroidia	Bacteroidales	Rikenellaceae	Alistipes_II
ACTCCTACGGGAGGCAGCAGTGGGGAATATTGGACAATGGGCGAAAGCCTGATCCAGCAATGCCGCGTGAGTGATGAAGGCCTTAGGGTTGTAAAGCTCTTTTACCCGGGATGATAATGACAGTACCGGGAGAATAAGCTCCGGCTAACTCCGTGCCAGCAGCCGCGGTAATACGGAGGGAGCTAGCGTTATTCGGAATTACTGGGCGTAAAGCGCACGTAGGCGGCTTTGTAAGTTAGAGGTGAAAGCCTGGAGCTCAACTCCAGAATTGCCTTTAAGACTGCATCGCTTGAATCCAGGAGAGGTGAGTGGAATTCCGAGTGTAGAGGTGAAATTCGTAGATATTCGGAAGAACACCAGTGGCGAAGGCGGCTCACTGGACTGGTATTGACGCTGAGG…	Proteobacteria	Alphaproteobacteria	Rhizobiales_2	Bradyrhizobiaceae	Bosea
ACTCCTACGGGAGGCAGCAGTGGGGAATATTGCACAATGGACGGAAGTCTGATGCAGCAACGCCGCGTGGAGGATGACACATTTCGGTGCGTAAACTCCTTTTATGTAAGAAGATAATGACGGTATTATATGAATAAGCACCGGCTAACTCCGTGCCAGCAGCCGCGGTAATACGGGGGGTGCAAGCGTTACTCGGAATCACTGGGCGTAAAGAGCGTGTAGGCGGATTGATAAGTTTGAAGTGAAATCCTATAGCTTAACTATAGAATTGCTTTGAAAACTGTTAGTCTAGAATGTGGGAGAGGTAGATGGAATTTCTGGTGTAGGGGTAAAATCCGTAGAGATCAGAAGGAATACCGATTGCGAAGGCGATCTACTGGAACAATATTGACGCTGAGA…	Proteobacteria	Epsilonproteobacteria	Campylobacterales	Campylobacteraceae	Arcobacter
ACTCCTACGGGAGGCAGCAGTGGGGAATATTGCACAATGGGGGAAACCCTGATGCAGCAACGCCGCGTGGAGGATGACGCATTTCGGTGTGTAAACTCCTTTTATTTGGGAAGATAATGACGGTACCAAATGAATAAGCACCGGCTAACTCCGTGCCAGCAGCCGCGGTAATACGGAGGGTGCAAGCGTTACTCGGAATCACTGGGCGTAAAGGGTGCGTAGGCGGGTTATCAAGTCTTAAGTGAAATCCAACAGCTTAACTGTTGAACTGCTTAGGAAACTGGCAACCTAGAGTAAGGGAGAGGTAGATGGAATTGGTGGTGTAGGGGTAAAATCCGTAGATATCACCAGGAATACTCATTGCGAAGGCGATCTACTGGAACTTAACTGACGCTGAGG…	Proteobacteria	Epsilonproteobacteria	Campylobacterales	Campylobacteraceae	Sulfurospirillum
ACTCCTACGGGAGGCAGCAGTGAGGAATCTTCCACAATGGGCGAAAGCCTGATGGAGCAATGCCGCGTGCAGGATGAAGGCCTTCGGGTTGTAAACTGCTTTTATTAGAGAAGAATATGACGGTAACTAATGAATAAGGGTCGGCTAACTACGTGCCAGCAGCCGCGGTCATACGTAGGACCCAAGCGTTATCCGGAGTGACTGGGCGTAAAGAGTTGCGTAGGCGGCGTGCTAAGCGAGTAGTGAAAATTATCGGCTCAACCGATAACCTATTATTCGAACTGGCATGCTCGAGAATAGTAGAGGTAGCTGGAATTACTAGTGTAGGAGTGGAATCCGTAGATATTAGTAGGAACACCAATGGCGTAGGCAGGCTACTGGACTATTTCTGACGCTAAG…	Patescibacteria	Saccharimonadia	Saccharimonadales	NA	NA
ACTCCTACGGGAGGCAGCAGTGAGGAATATTGGTCAATGGACGCAAGTCTGAACCAGCCATGCCGCGTGCAGGAAGACGGCTCTATGAGTTGTAAACTGCTTTTGTACGAGGGTAAACCCTGATACGTGTATCAGGCTGAAAGTATCGTACGAATAAGGATCGGCTAACTCCGTGCCAGCAGCCGCGGTAATACGGAGGATCCAAGCGTTATCCGGATTTATTGGGTTTAAAGGGTGCGTAGGCGGTTTGTTAAGTTAGAGGTGAAATTCCGTGGCTCAACCACGGCACTGCCTCTGATACTGGCAGGCTAGAGAATGGTTGCTGTGGGCGGAATGTGTGGTGTAGCGGTGAAATGCTTAGAGATCACACAGAACACCGATTGCGAAGGCAGCTCACAA…	Bacteroidetes	Bacteroidia	Bacteroidales	Rikenellaceae	Alisitpes_IV
ACTCCTACGGGAGGCAGCAGTGGGGAATATTGCACAATGGGCGAAAGCCTGATGCAGCAACGCCGCGTGAGTGATGAAGGTCTTCGGATTGTAAAGCTCTTTGATTAGGGACGATAATGACGGTACCTAAAGAACAAGCCACGGCTAACTACGTGCCAGCAGCCGCGGTAATACGTAGGTGGCAAGCGTTGTCCGGATTTATTGGGCGTAAAGGGAGCGTAGGCGGACCTTTAAGTCAGATGTGAAATACCCAGGGCTCAACCCGGGTGCTGCATTTGATACTGGAGGTCTAGAGTACAGGAGAGGAGAGTGGAATTCCTAGTGTAGCGGTGAAATGCGTAGAGATTAGGAAGAACACCAGTGGCGAAGGCGACTCTCTGGACTGTAACTGACGCTGAG…	Firmicutes	Clostridia_1	Clostridiales	Clostridiaceae_1	Arthropod_cluster
ACTCCTACGGGAGGCAGCAGTGAGGAATATTGGTCAATGGCCGTAAGGCTGAACCAGCCAAGTAGCGTGAAGGATGACGGCCCTATGGGTTGTAAACTTCTTTTATATGGGAATAACGTTACCCACGTGTGGGTATGTGCATGTACCATGTGAATAAGGATCGGCTAACTCCGTGCCAGCAGCCGCGGTAATACGGAGGATCCGAGCGTTATCCGGATTTATTGGGTTTAAAGGGAGCGTAGGCGGGATCTCAAGTCAGCTGTGAAATGTAGATGCTCAACATCTGCACTGCAGTTGAAACTGGTATTCTTGAGTGCGTAAGAGGTAGGCGGAATTCGTCGTGTAGCGGTGAAATGCATAGATATGACGAAGAACTCCGATTGCGAAGGCAGCTTACTG…	Bacteroidetes	Bacteroidia	Bacteroidales	Bacteroidales_UCG-001	NA
ACTCCTACGGGAGGCAGCAGTAAGGAATATTGGGCAATGGACGCAAGTCTGACCCAGCCATGCCGCGTGAAGGAAGACAGCCCTATGGGTTGTAAACTTCTTTTAACAGAGGATAAAGTCGCGTATGTATACGCGTTTGCAGGTATCTGTTGAATAAGCATCGGCTAACTCCGTGCCAGCAGCCGCGGTAATACGGAGGATGCAAGCGTTATCCGGATTCATTGGGTTTAAAGGGTGCGCAGGCGGACTTTTAAGTCAGCGGTGAAATTCCACGGCTCAACCGTGGCGCTGCCGTTGATACTGGGAGTCTTGAGTGTGATTGAGGTGGGCGGAATGTAGCGTGTAGCGGTGAAATGCATAGATATGCTACAGAACACCAATTGCGAAGGCAGCTCACCA…	Bacteroidetes	Sphingobacteria	Sphingobacteriales_1	SB_1	Termite_cluster
ACTCCTACGGGAGGCAGCAGTGGGGAATATTGCACAATGGGGGAAACCCTGATGCAGCGACGCCGCGTGAAGGAAGAAGTATTTCGGTATGTAAACTTCTATCAGCAGGGAAGAAAATGACGGTACCTGACTAAGAAGCCCCGGCTAATTACGTGCCAGCAGCCGCGGTAATACGTAAGGGGCAAGCGTTATCCGGATTTACTGGGTGTAAAGGGAGCGTAGACGGCTGTGTAAGTCAGATGTGAAAGCCCGGGGCTCAACCCCGGGACTGCATTTGAAACTATGCAGCTAGAGTGTCGGAGAGGTAAGCGGAATTCCTAGTGTAGCGGTGAAATGCGTAGATATTAGGAGGAACACCAGTGGCGAAGGCGGCTTACTGGACGATGACTGACGTTGAGG…	Firmicutes	Clostridia_1	Clostridiales	Lachnospiraceae	Robinsoniella_Insects
ACTCCTACGGGAGGCAGCAGTGGGGGATATTGCACAATGGGCGAAAGCCTGATGCAGCGACGCCGCGTGAGGGAAGAAGGTTTTCGGATTGTAAACCTCTGTCTTCGAGGACGAAGAAGTGACGGTACTCGAGGAGGAAGCCACGGCTAACTACGTGCCAGCAGCCGCGGTAAAACGTAGGTGGCAAGCGTTGTCCGGAATTACTGGGTGTAAAGGGAGCGCAGGCGGGGCGATAAGTTGAATGTGAAATGTATGGGCTCAACCCATAGACTGCGTTCAAAACTATCGTTCTTGAGTGATGTAGAGGCAGGCGGAATTCCCGGTGTAGCGGTGGAATGCGTAGATATCGGGAGGAACACCAGTGGCGAAGGCGGCCTGCTGGGCATAAACTGACGCTGA…	Firmicutes	Clostridia_1	Clostridiales	Ruminococcaceae	Termite_cockroach_cluster
ACTCCTACGGGAGGCAGCAGTGGGGAATATTGCACAATGGACGGAAGTCTGATGCAGCAACGCCGCGTGGAGGATGACACATTTCGGTGCGTAAACTCCTTTTATGTAAGAAGATAATGACGGTATTATATGAATAAGCACCGGCTAACTCCGTGCCAGCAGCCGCGGTAATACGGGGGGTGCAAGCGTTACTCGGAATCACTGGGCGTAAAGAGCGTGTAGGCGGATTGATAAGTTTGAAGTGAAATCCTATAGCTTAACTATAGAACTGCTTTGAAAACTGTTAGTCTAGAATGTGGGAGAGGTAGATGGAATTTCTGGTGTAGGGGTAAAATCCGTAGAGATCAGAAGGAATACCGATTGCGAAGGCGATCTACTGGAACAATATTGACGCTGAGA…	Proteobacteria	Epsilonproteobacteria	Campylobacterales	Campylobacteraceae	Arcobacter
ACTCCTACGGGAGGCAGCAGTGGGGAATATTGCACAATGGGCGCAAGCCTGATGCAGCCATGCCGCGTGTATGAAGAAGGCCTTCGGGTTGTAAAGTACTTTCAGCGGGGAGGAAGGGAGTGTGCTTAATACGCACATTCATTGACGTTACCCGCAGAAGAAGCACCGGCTAACTCCGTGCCAGCAGCCGCGGTAATACGGAGGGTGCAAGCGTTAATCGGAATTACTGGGCGTAAAGCGCACGCAGGCGGTCTGTTAAGTCAGATGTGAAATCCCCGGGCTCAACCCGGGAACTGCATTTGAAACTGGCAGGCTTGAGTCTCGTAGAGGGGGGTGGAATTCCAGGTGTAGCGGTGAAATGCGTAGAGATCTGGAGGAATACCGGTGGCGAAGGCGGCC…	Proteobacteria	Gammaproteobacteria_1	Enterobacteriales	Enterobacteriaceae	Escherichia_blattae_cluster
ACTCCTACGGGAGGCAGCAGTGAGGAATATTGGTCAATGGGGGCAACCCTGAACCAGCCATGCCGCGTGCAGGAAGACGGCTCTATGAGTTGTAAACTGCTTTTATACAGGGATAAATCATGATACGTGTATCATGTTGCAGGTACTGTATGAATAAGGATCGGCTAACTCCGTGCCAGCAGCCGCGGTAATACGGAGGATCCAAGCGTTATCCGGATTTATTGGGTTTAAAGGGTGCGTAGGCGGCACGGTAAGTTAGCGGTGAAATCGCGGGGCTCAACCCCGCAACTGCCGTTAAAACTGCCGAGCTAGAGAGTAGATGCGGTAGGCGGAATGTGTAGTGTAGCGGTGAAATGCTTAGAGATTACACAGAACACCGATTGCGAAGGCAGCTTACCA…	Bacteroidetes	Bacteroidia	Bacteroidales	Rikenellaceae	Alistipes_II
ACTCCTACGGGAGGCAGCAGTGGGGAATATTGCACAATGGGGGAAACCCTGATGCAGCGACGCCGCGTGAGTGAAGACGGCCTTCGGGTTGTAAAGCTCTGTTGCGGGGGACGATAATGACGGTACCCCGTGAGGAAGCCACGGCTAACTACGTGCCAGCAGCCGCGGTAATACGTAGGTGGCAAGCGTTGTCCGGAATTACTGGGTGTAAAGGGAGCGTAGGCGGGCAATTAAGTTGGATGTGAAATCTACAGGCTTAACCTGTAGCGTGCATCCAAAACTGAATGTCTTGAGTGATGTAGAGGCAGGCGGAATTCCTAGTGTAGCGGTGAAATGCGTAGATATTAGGAGGAACACCAGTGGCGAAGGCGGCCTGCTGGGCATTAACTGACGCTGAGG…	Firmicutes	Clostridia_1	Clostridiales	Ruminococcaceae	Insect_cluster
ACTCCTACGGGAGGCAGCAGTGGGGAATTTTGGACAATGGGGGCAACCCTGATCCAGCCATGCCGCGTGAGTGAAGAAGGCCTTCGGGTTGTAAAGCTCTTTTGTACGGGAAGAAAAGGTTATTGCTAATATCGATGATACTTGACGGTACCGTAAGAATAAGCACCGGCTAACTACGTGCCAGCAGCCGCGGTAATACGTAGGGTGCAAGCGTTAATCGGAATTACTGGGCGTAAAGCGTGCGCAGGCGGCTTGTTGTGTCTGCTGTGAAATCCCCGGGCTTAACCTGGGAACTGCGGTGGAAACTGGCAAGCTTGAGTGTGGCAGAGGGGGGTGGAATTCCACGTGTAGCAGTGAAATGCGTAGAGATGTGGAGGAACACCGATGGCGAAGGCAGCC…	Proteobacteria	Betaproteobacteria	Rhodocyclales	Rhodocyclaceae_3	Termite_cluster
ACTCCTACGGGAGGCAGCAGTGGGGAATATTGGACAATGGGCGAAAGCCTGATCCAGCAATGCCGCGTGAGTGATGAAGGCCTTAGGGTTGTAAAGCTCTTTTACCCGGGATGATAATGACAGTACCGGGAGAATAAGCTCCGGCTAACTCCGTGCCAGCAGCCGCGGTAATACGGAGGGAGCTAGCGTTATTCGGAATTACTGGGCGTAAAGCGCACGTAGGCGGCTTTGTAAGTTAGAGGTGAAAGCCTGGAGCTCAACTCCAGAATTGCCTTTAAGACTGCATCGCTTGAATCCAGGAGAGGTGAGTGGAATTCCGAGTGTAGAGGTGAAATTCGTAGATATTCGGAAGAACACCAGTGGCGAAGGCGGCTCACTGGACTGGTATTGACGCTGAGG…	Proteobacteria	Alphaproteobacteria	Rhizobiales_2	Bradyrhizobiaceae	Bosea
ACTCCTACGGGAGGCAGCAGTGGGGAATATTGCACAATGGACGGAAGTCTGATGCAGCAACGCCGCGTGGAGGATGACACATTTCGGTGCGTAAACTCCTTTTATGTAAGAAGATAATGACGGTATTATATGAATAAGCACCGGCTAACTCCGTGCCAGCAGCCGCGGTAATACGGGGGGTGCAAGCGTTACTCGGAATCACTGGGCGTAAAGAGCGTGTAGGCGGATTGATAAGTTTGAAGTGAAATCCTATAGCTTAACTATAGAACTGCTTTGAAAACTGTTAGTCTAGAATGTGGGAGAGGTAGATGGAATTTCTGGTGTAGGGGTAAAATCCGTAGAGATCAGAAGGAATACCGATTGCGAAGGCGATCTACTGGAACAATATTGACGCTGAGA…	Proteobacteria	Epsilonproteobacteria	Campylobacterales	Campylobacteraceae	Arcobacter
ACTCCTACGGGAGGCAGCAGTGGGGAATATTGCACAATGGGCGCAAGCCTGATGCAGCCATGCCGCGTGTATGAAGAAGGCCTTCGGGTTGTAAAGTACTTTCAGCGGGGAGGAAGGGAGTGTGCTTAATACGCACATTCATTGACGTTACCCGCAGAAGAAGCACCGGCTAACTCCGTGCCAGCAGCCGCGGTAATACGGAGGGTGCAAGCGTTAATCGGAATTACTGGGCGTAAAGCGCACGCAGGCGGTCTGTTAAGTCAGATGTGAAATCCCCGGGCTCAACCCGGGAACTGCATTTGAAACTGGCAGGCTTGAGTCTCGTAGAGGGGGGTGGAATTCCAGGTGTAGCGGTGAAATGCGTAGAGATCTGGAGGAATACCGGTGGCGAAGGCGGCC…	Proteobacteria	Gammaproteobacteria_1	Enterobacteriales	Enterobacteriaceae	Escherichia_blattae_cluster
ACTCCTACGGGAGGCAGCAGTGGGGGATATTGCACAATGGGCGAAAGCCTGATGCAGCGACGCCGCGTGAGGGAAGAAGGTTTTCGGATTGTAAACCTCTGTCTTCGAGGACGAAGAAGTGACGGTACTCGAGGAGGAAGCCACGGCTAACTACGTGCCAGCAGCCGCGGTAAAACGTAGGTGGCAAGCGTTGTCCGGAATTACTGGGTGTAAAGGGAGCGCAGGCGGGGCGATAAGTTGAATGTGAAATGTATGGGCTCAACCCATAGACTGCGTTCAAAACTATCGTTCTTGAGTGATGTAGAGGCAGGCGGAATTCCCGGTGTAGCGGTGGAATGCGTAGATATCGGGAGGAACACCAGTGGCGAAGGCGGCCTGCTGGGCATAAACTGACGCTGA…	Firmicutes	Clostridia_1	Clostridiales	Ruminococcaceae	Termite_cockroach_cluster
ACTCCTACGGGAGGCAGCAGTGAGGAATATTGGTCAATGGGGGCAACCCTGAACCAGCCATGCCGCGTGCAGGAAGACGGCTCTATGAGTTGTAAACTGCTTTTGTACAGGGATAAATACATATACGTGTATATGTTTGAAGGTACTGTACGAATAAGGATCGGCTAACTCCGTGCCAGCAGCCGCGGTAATACGGAGGATCCGAGCGTTATCCGGATTTATTGGGTTTAAAGGGTGCGTAGGCGGCGAGGTAAGTTAGAGGTGAAATCCCGTGGCTCAACCACGGAACCGCCTCTGATACTGCTTTGCTAGAGAGTAGATGCGGTAGGCGGAATGTGTAGTGTAGCGGTGAAATGCTTAGAGATTACACAGAACACCGATTGCGAAGGCAGCTTACCA…	Bacteroidetes	Bacteroidia	Bacteroidales	Rikenellaceae	Alistipes_II
ACTCCTACGGGAGGCAGCAGTGAGGAATATTGGTCAATGGCCGTAAGGCTGAACCAGCCAAGTAGCGTGAAGGATGACGGCCCTATGGGTTGTAAACTTCTTTTATATGGGAATAACGTTACCCACGTGTGGGTATGTGCATGTACCATGTGAATAAGGATCGGCTAACTCCGTGCCAGCAGCCGCGGTAATACGGAGGATCCGAGCGTTATCCGGATTTATTGGGTTTAAAGGGAGCGTAGGCGGGATCTCAAGTCAGCTGTGAAATGTAGATGCTCAACATCTGCACTGCAGTTGAAACTGGTATTCTTGAGTGCGTAAGAGGTAGGCGGAATTCGTCGTGTAGCGGTGAAATGCATAGATATGACGAAGAACTCCGATTGCGAAGGCAGCTTACTG…	Bacteroidetes	Bacteroidia	Bacteroidales	Bacteroidales_UCG-001	NA
ACTCCTACGGGAGGCAGCAGTGGGGAATATTGCACAATGGACGGAAGTCTGATGCAGCAACGCCGCGTGGAGGATGACACATTTCGGTGCGTAAACTCCTTTTATGTAAGAAGATAATGACGGTATTATATGAATAAGCACCGGCTAACTCCGTGCCAGCAGCCGCGGTAATACGGGGGGTGCAAGCGTTACTCGGAATCACTGGGCGTAAAGAGCGTGTAGGCGGATTGATAAGTTTGAAGTGAAATCCTATAGCTTAACTATAGAATTGCTTTGAAAACTGTTAGTCTAGAATGTGGGAGAGGTAGATGGAATTTCTGGTGTAGGGGTAAAATCCGTAGAGATCAGAAGGAATACCGATTGCGAAGGCGATCTACTGGAACAATATTGACGCTGAGA…	Proteobacteria	Epsilonproteobacteria	Campylobacterales	Campylobacteraceae	Arcobacter
ACTCCTACGGGAGGCAGCAGTGGGGAATATTGCACAATGGGCGAAAGCCTGATGCAGCAACGCCGCGTGAGTGATGAAGGTCTTCGGATTGTAAAGCTCTTTGATTAGGGACGATAATGACGGTACCTAAAGAACAAGCCACGGCTAACTACGTGCCAGCAGCCGCGGTAATACGTAGGTGGCAAGCGTTGTCCGGATTTATTGGGCGTAAAGGGAGCGTAGGCGGACCTTTAAGTCAGATGTGAAATACCCAGGGCTCAACCCGGGTGCTGCATTTGATACTGGAGGTCTAGAGTACAGGAGAGGAGAGTGGAATTCCTAGTGTAGCGGTGAAATGCGTAGAGATTAGGAAGAACACCAGTGGCGAAGGCGACTCTCTGGACTGTAACTGACGCTGAG…	Firmicutes	Clostridia_1	Clostridiales	Clostridiaceae_1	Arthropod_cluster
ACTCCTACGGGAGGCAGCAGTGAGGAATATTGGTCAATGGACGCAAGTCTGAACCAGCCATGCCGCGTGCAGGAAGACGGCTCTATGAGTTGTAAACTGCTTTTGTACGAGGGTAAACCCTGATACGTGTATCAGGCTGAAAGTATCGTACGAATAAGGATCGGCTAACTCCGTGCCAGCAGCCGCGGTAATACGGAGGATCCAAGCGTTATCCGGATTTATTGGGTTTAAAGGGTGCGTAGGCGGTTTGTTAAGTTAGAGGTGAAATTCCGTGGCTCAACCACGGCACTGCCTCTGATACTGGCAGGCTAGAGAATGGTTGCTGTGGGCGGAATGTGTGGTGTAGCGGTGAAATGCTTAGAGATCACACAGAACACCGATTGCGAAGGCAGCTCACAA…	Bacteroidetes	Bacteroidia	Bacteroidales	Rikenellaceae	Alisitpes_IV
ACTCCTACGGGAGGCAGCAGTGGGGAATATTGCACAATGGGCGCAAGCCTGATGCAGCCATGCCGCGTGTATGAAGAAGGCCTTCGGGTTGTAAAGTACTTTCAGCGGGGAGGAAGGGAGTGTGCTTAATACGCACATTCATTGACGTTACCCGCAGAAGAAGCACCGGCTAACTCCGTGCCAGCAGCCGCGGTAATACGGAGGGTGCAAGCGTTAATCGGAATTACTGGGCGTAAAGCGCACGCAGGCGGTCTGTTAAGTCAGATGTGAAATCCCCGGGCTCAACCCGGGAACTGCATTTGAAACTGGCAGGCTTGAGTCTCGTAGAGGGGGGTGGAATTCCAGGTGTAGCGGTGAAATGCGTAGAGATCTGGAGGAATACCGGTGGCGAAGGCGGCC…	Proteobacteria	Gammaproteobacteria_1	Enterobacteriales	Enterobacteriaceae	Escherichia_blattae_cluster
ACTCCTACGGGAGGCAGCAGTGGGGAATTTTGGACAATGGGGGCAACCCTGATCCAGCCATGCCGCGTGAGTGAAGAAGGCCTTCGGGTTGTAAAGCTCTTTTGTACGGGAAGAAAAGGTTATTGCTAATATCGATGATACTTGACGGTACCGTAAGAATAAGCACCGGCTAACTACGTGCCAGCAGCCGCGGTAATACGTAGGGTGCAAGCGTTAATCGGAATTACTGGGCGTAAAGCGTGCGCAGGCGGCTTGTTGTGTCTGCTGTGAAATCCCCGGGCTTAACCTGGGAACTGCGGTGGAAACTGGCAAGCTTGAGTGTGGCAGAGGGGGGTGGAATTCCACGTGTAGCAGTGAAATGCGTAGAGATGTGGAGGAACACCGATGGCGAAGGCAGCC…	Proteobacteria	Betaproteobacteria	Rhodocyclales	Rhodocyclaceae_3	Termite_cluster
ACTCCTACGGGAGGCAGCAGTGAGGAATATTGGTCAATGGGGGCAACCCTGAACCAGCCATGCCGCGTGCAGGAAGACGGCTCTATGAGTTGTAAACTGCTTTTGTAGATGGATAAATCACGGTACGCGTACCGTGTTGCAGGTAGTCTACGAATAAGGATCGGCTAACTCCGTGCCAGCAGCCGCGGTAATACGGAGGATCCGAGCGTTATCCGGATTTATTGGGTTTAAAGGGTGCGTAGGCGGCACGGTAAGTTAGAGGTGAAATGCGGTGGCTCAACCACCGAACTGCCTCTGATACTGCCGGGCTAGAGATTAGATGCGGTAGGCGGAATGTGTGGTGTAGCGGTGAAATGCTTAGAGATCACACAGAACACCGATTGCGAAGGCAGCTTACCA…	Bacteroidetes	Bacteroidia	Bacteroidales	Rikenellaceae	Alistipes_II
ACTCCTACGGGAGGCAGCAGTGGGGAATATTGGGCAATGGGCGAAAGCCTGACCCAGCAACGCCGCGTGAGGGAAGAAGGTTTTCGGATCGTAAACCTCTGTCGCAAGGGACGAGTAGAAGACGGTACCTTGCAAGGAAGCTCCGGCTAACTACGTGCCAGCAGCCGCGGTAATACGTAGGGAGCGAGCGTTGTCCGGAATGACTGGGCGTAAAGGGCGCGTAGGTGGCCCTATAAGTTAGGAGTGAAAGTCCCGCTTTCAAGGTGGGAATTGCTTTTAATACTGTAGGGCTTGAGTGTGGGAGAGGATAGCGGAATTCCCGGTGTAGCGGTGAAATGCGTAGAGATCGGGAGGAACACCAGTGGCGAAGGCGGCTATCTGGACCAAGACTGACACTGA…	Firmicutes	Clostridia_1	Clostridiales	Lachnospiraceae	Gut_cluster_13
ACTCCTACGGGAGGCAGCAGTGGGGAATATTGGACAATGGGCGAAAGCCTGATCCAGCAATGCCGCGTGAGTGATGAAGGCCTTAGGGTTGTAAAGCTCTTTTACCCGGGATGATAATGACAGTACCGGGAGAATAAGCTCCGGCTAACTCCGTGCCAGCAGCCGCGGTAATACGGAGGGAGCTAGCGTTATTCGGAATTACTGGGCGTAAAGCGCACGTAGGCGGCTTTGTAAGTTAGAGGTGAAAGCCTGGAGCTCAACTCCAGAATTGCCTTTAAGACTGCATCGCTTGAATCCAGGAGAGGTGAGTGGAATTCCGAGTGTAGAGGTGAAATTCGTAGATATTCGGAAGAACACCAGTGGCGAAGGCGGCTCACTGGACTGGTATTGACGCTGAGG…	Proteobacteria	Alphaproteobacteria	Sphingomonadales	Sphingomonadaceae	Sphingomonas
ACTCCTACGGGAGGCAGCAGTGAGGAATATTGGTCAATGGACGCAAGTCTGAACCAGCCATGCCGCGTGCAGGAAGACGGCTCTATGAGTTGTAAACTGCTTTTGTACGAGGGTAAACCCGACTACGTGTAGTCGGCTGAAAGTATCGTACGAATAAGGATCGGCTAACTCCGTGCCAGCAGCCGCGGTAATACGGAGGATCCAAGCGTTATCCGGATTTATTGGGTTTAAAGGGTGCGTAGGCGGTTCGGTAAGTTAGAGGTGAAATTCCGTGGCTCAACCACGGCACTGCCTCTGATACTGCCGGGCTAGAGAATGGTTGCTGTGGGCGGAATGTGTGGTGTAGCGGTGAAATGCTTAGAGATCACACAGAACACCGATTGCGAAGGCAGCTCACAA…	Bacteroidetes	Bacteroidia	Bacteroidales	Rikenellaceae	Alisitpes_IV
ACTCCTACGGGAGGCAGCAGTGAGGAATATTCCACAATGGGCGAAAGCCTGATGGAGCAATGCCGCGTGCAGGATGAAGGCCTTCGGGTTGTAAACTGCTTTTATTAGAGAAGAATATGACGGTAACTAATGAATAAGGGTCGGCTAACTACGTGCCAGCAGCCGCGGTCATACGTAGGACCCAAGCGTTATCCGGAGTGACTGGGCGTAAAGAGTTGCGTAGGCGGTTAGATAAGCGAGTGATGAAAACTATCGGCTCAACCGGTAGCCTATTATTCGAACTGTTTAACTCGAGAGTATCAGAGGTCGCTGGAATTCCTTGTGTAGGAGTGAAATCCGTAGATATAAGGAGGAACACCAATGGCGTAGGCAGGCGACTGGGATATTTCTGACGCTAAG…	Patescibacteria	Saccharimonadia	Saccharimonadales	NA	NA
ACTCCTACGGGAGGCAGCAGTGGGGGATATTGCACAATGGGCGAAAGCCTGATGCAGCGACGCCGCGTGAGGGAAGAAGGTTTTCGGATTGTAAACCTCTGTCTTCGAGGACGAAGAAGTGACGGTACTCGAGGAGGAAGCCACGGCTAACTACGTGCCAGCAGCCGCGGTAAAACGTAGGTGGCAAGCGTTGTCCGGAATTACTGGGTGTAAAGGGAGCGCAGGCGGGGCGATAAGTTGAATGTGAAATGTATGGGCTCAACCCATAGACTGCGTTCAAAACTATCGTTCTTGAGTGATGTAGAGGCAGGCGGAATTCCCGGTGTAGCGGTGGAATGCGTAGATATCGGGAGGAACACCAGTGGCGAAGGCGGCCTGCTGGGCATAAACTGACGCTGA…	Firmicutes	Clostridia_1	Clostridiales	Ruminococcaceae	Termite_cockroach_cluster
ACTCCTACGGGAGGCAGCAGTGGGGAATATTGCACAATGGGCGCAAGCCTGATGCAGCCATGCCGCGTGTATGAAGAAGGCCTTCGGGTTGTAAAGTACTTTCAGCGGGGAGGAAGGGAGTGTGCTTAATACGCACATTCATTGACGTTACCCGCAGAAGAAGCACCGGCTAACTCCGTGCCAGCAGCCGCGGTAATACGGAGGGTGCAAGCGTTAATCGGAATTACTGGGCGTAAAGCGCACGCAGGCGGTCTGTTAAGTCAGATGTGAAATCCCCGGGCTCAACCCGGGAACTGCATTTGAAACTGGCAGGCTTGAGTCTCGTAGAGGGGGGTGGAATTCCAGGTGTAGCGGTGAAATGCGTAGAGATCTGGAGGAATACCGGTGGCGAAGGCGGCC…	Proteobacteria	Gammaproteobacteria_1	Enterobacteriales	Enterobacteriaceae	Escherichia_blattae_cluster
ACTCCTACGGGAGGCAGCAGTGGGGAATATTGCACAATGGGCGAAAGCCTGATGCAGCAACGCCGCGTGAGTGATGAAGGTCTTCGGATTGTAAAGCTCTTTGATTAGGGACGATAATGACGGTACCTAAAGAACAAGCCACGGCTAACTACGTGCCAGCAGCCGCGGTAATACGTAGGTGGCAAGCGTTGTCCGGATTTATTGGGCGTAAAGGGAGCGTAGGCGGACCTTTAAGTCAGATGTGAAATACCCAGGGCTCAACCCGGGTGCTGCATTTGATACTGGAGGTCTAGAGTACAGGAGAGGAGAGTGGAATTCCTAGTGTAGCGGTGAAATGCGTAGAGATTAGGAAGAACACCAGTGGCGAAGGCGACTCTCTGGACTGTAACTGACGCTGAG…	Firmicutes	Clostridia_1	Clostridiales	Clostridiaceae_1	Arthropod_cluster
ACTCCTACGGGAGGCAGCAGTGGGGAATATTGGGCAATGGGCGAAAGCCTGACCCAGCAACGCCGCGTGAAGGAAGAAGGTTTTCGGATCGTAAACTTCTATCCCGGGTGAAGATAATGACGGTAGCCCGGAAGGAAGCCCCGGCTAACTACGTGCCAGCAGCCGCGGTAATACGTAGGGGGCAAGCGTTGTCCGGAATGATTGGGCGTAAAGGGCGCGTAGGCGGCTCTGTAAGTCTGGAGTGAAAGTCCTGCTTTTAAGGTGGGAATTGCTTTGGAAACTGTGGAGCTTGAGTGCAGGAGAGGTTAGCGGAATTCCCGGTGTAGCGGTGAAATGCGTAGAGATCGGGAGGAACACCAGTGGCGAAGGCGGCTAACTGGACTGTAACTGACGCTGAGG…	Firmicutes	Clostridia_1	Clostridiales	Lachnospiraceae	Gut_cluster_13
ACTCCTACGGGAGGCAGCAGTGAGGAATCTTCCACAATGGGCGAAAGCCTGATGGAGCAATGCCGCGTGCAGGATGAAGGCCTTCGGGTTGTAAACTGCTTTTATTAGAGAAGAATATGACGGTAACTAATGAATAAGGGTCGGCTAACTACGTGCCAGCAGCCGCGGTCATACGTAGGACCCAAGCGTTATCCGGAGTGACTGGGCGTAAAGAGTTGCGTAGGCGGCGTGCTAAGCGAGTAGTGAAAATTATCGGCTCAACCGATAACCTATTATTCGAACTGGCATGCTCGAGAATAGTAGAGGTAGCTGGAATTACTAGTGTAGGAGTGGAATCCGTAGATATTAGTAGGAACACCAATGGCGTAGGCAGGCTACTGGACTATTTCTGACGCTAAG…	Patescibacteria	Saccharimonadia	Saccharimonadales	NA	NA
ACTCCTACGGGAGGCAGCAGTGAGGAATATTGGTCAATGGGGGCAACCCTGAACCAGCCATGCCGCGTGCAGGAAGACGGCTCTATGAGTTGTAAACTGCTTTTGTACAGGGATAAATACATATACGTGTATATGTTTGAAGGTACTGTACGAATAAGGATCGGCTAACTCCGTGCCAGCAGCCGCGGTAATACGGAGGATCCGAGCGTTATCCGGATTTATTGGGTTTAAAGGGTGCGTAGGCGGCGAGGTAAGTTAGAGGTGAAATCCCGTGGCTCAACCACGGAACCGCCTCTGATACTGCTTTGCTAGAGAGTAGATGCGGTAGGCGGAATGTGTAGTGTAGCGGTGAAATGCTTAGAGATTACACAGAACACCGATTGCGAAGGCAGCTTACCA…	Bacteroidetes	Bacteroidia	Bacteroidales	Rikenellaceae	Alistipes_II
ACTCCTACGGGAGGCAGCAGTAAGGAATATTGGGCAATGGACGCAAGTCTGACCCAGCCATGCCGCGTGAAGGAAGACAGCCCTATGGGTTGTAAACTTCTTTTAACAGAGGATAAAGTCGCGTATGTATACGCGTTTGCAGGTATCTGTTGAATAAGCATCGGCTAACTCCGTGCCAGCAGCCGCGGTAATACGGAGGATGCAAGCGTTATCCGGATTCATTGGGTTTAAAGGGTGCGCAGGCGGACTTTTAAGTCAGCGGTGAAATTCCACGGCTCAACCGTGGCGCTGCCGTTGATACTGGGAGTCTTGAGTGTGATTGAGGTGGGCGGAATGTAGCGTGTAGCGGTGAAATGCATAGATATGCTACAGAACACCAATTGCGAAGGCAGCTCACCA…	Bacteroidetes	Sphingobacteria	Sphingobacteriales_1	SB_1	Termite_cluster
ACTCCTACGGGAGGCAGCAGTGAGGAATATTGGTCAATGGGGGCAACCCTGAACCAGCCATGCCGCGTGCAGGAAGACGGCTCTATGAGTTGTAAACTGCTTTTGTAGATGGATAAATCACGGTACGCGTACCGTGTTGCAGGTAGTCTACGAATAAGGATCGGCTAACTCCGTGCCAGCAGCCGCGGTAATACGGAGGATCCGAGCGTTATCCGGATTTATTGGGTTTAAAGGGTGCGTAGGCGGCACGGTAAGTTAGAGGTGAAATGCGGTGGCTCAACCACCGAACTGCCTCTGATACTGCCGGGCTAGAGATTAGATGCGGTAGGCGGAATGTGTGGTGTAGCGGTGAAATGCTTAGAGATCACACAGAACACCGATTGCGAAGGCAGCTTACCA…	Bacteroidetes	Bacteroidia	Bacteroidales	Rikenellaceae	Alistipes_II
ACTCCTACGGGAGGCAGCAGTGAGGAATCTTCCACAATGGGCGAAAGCCTGATGGAGCAATGCCGCGTGCAGGATGAAGGCCTTCGGGTTGTAAACTGCTTTTATTAGAGAAGAATATGACGGTAACTAATGAATAAGGGTCGGCTAACTACGTGCCAGCAGCCGCGGTCATACGTAGGACCCAAGCGTTATCCGGAGTGACTGGGCGTAAAGAGTTGCGTAGGCGGCGTGCTAAGCGAGTAGTGAAAATTATCGGCTCAACCGATAACCTATTATTCGAACTGGCATGCTCGAGAATAGTAGAGGTAGCTGGAATTACTAGTGTAGGAGTGGAATCCGTAGATATTAGTAGGAACACCAATGGCGTAGGCAGGCTACTGGACTATTTCTGACGCTAAG…	Patescibacteria	Saccharimonadia	Saccharimonadales	NA	NA
ACTCCTACGGGAGGCAGCAGTGGGGGATATTGCACAATGGGCGAAAGCCTGATGCAGCGACGCCGCGTGAGGGAAGAAGGTTTTCGGATTGTAAACCTCTGTCTTCGAGGACGAAGAAGTGACGGTACTCGAGGAGGAAGCCACGGCTAACTACGTGCCAGCAGCCGCGGTAAAACGTAGGTGGCAAGCGTTGTCCGGAATTACTGGGTGTAAAGGGAGCGCAGGCGGGGCGATAAGTTGAATGTGAAATGTATGGGCTCAACCCATAGACTGCGTTCAAAACTATCGTTCTTGAGTGATGTAGAGGCAGGCGGAATTCCCGGTGTAGCGGTGGAATGCGTAGATATCGGGAGGAACACCAGTGGCGAAGGCGGCCTGCTGGGCATAAACTGACGCTGA…	Firmicutes	Clostridia_1	Clostridiales	Ruminococcaceae	Termite_cockroach_cluster
ACTCCTACGGGAGGCAGCAGTGGGGAATATTGCACAATGGGCGCAAGCCTGATGCAGCCATGCCGCGTGTATGAAGAAGGCCTTCGGGTTGTAAAGTACTTTCAGCGGGGAGGAAGGGAGTGTGCTTAATACGCACATTCATTGACGTTACCCGCAGAAGAAGCACCGGCTAACTCCGTGCCAGCAGCCGCGGTAATACGGAGGGTGCAAGCGTTAATCGGAATTACTGGGCGTAAAGCGCACGCAGGCGGTCTGTTAAGTCAGATGTGAAATCCCCGGGCTCAACCCGGGAACTGCATTTGAAACTGGCAGGCTTGAGTCTCGTAGAGGGGGGTGGAATTCCAGGTGTAGCGGTGAAATGCGTAGAGATCTGGAGGAATACCGGTGGCGAAGGCGGCC…	Proteobacteria	Gammaproteobacteria_1	Enterobacteriales	Enterobacteriaceae	Escherichia_blattae_cluster
ACTCCTACGGGAGGCAGCAGTGGGGAATATTGCACAATGGGGGAAACCCTGATGCAGCAACGCCGCGTGGAGGATGACGCATTTCGGTGTGTAAACTCCTTTTATTTGGGAAGATAATGACGGTACCAAATGAATAAGCACCGGCTAACTCCGTGCCAGCAGCCGCGGTAATACGGAGGGTGCAAGCGTTACTCGGAATCACTGGGCGTAAAGGGTGCGTAGGCGGGTTATCAAGTCTTAAGTGAAATCCAACAGCTTAACTGTTGAACTGCTTAGGAAACTGGCAACCTAGAGTAAGGGAGAGGTAGATGGAATTGGTGGTGTAGGGGTAAAATCCGTAGATATCACCAGGAATACTCATTGCGAAGGCGATCTACTGGAACTTAACTGACGCTGAGG…	Proteobacteria	Epsilonproteobacteria	Campylobacterales	Campylobacteraceae	Sulfurospirillum
ACTCCTACGGGAGGCAGCAGTGGGGGATATTGCACAATGGGCGAAAGCCTGATGCAGCGACGCCGCGTGAGGGAAGAAGGTTTTCGGATTGTAAACCTCTGTCTTCGAGGACGAAGAAGTGACGGTACTCGAGGAGGAAGCCACGGCTAACTACGTGCCAGCAGCCGCGGTAAAACGTAGGTGGCAAGCGTTGTCCGGAATTACTGGGTGTAAAGGGAGCGCAGGCGGGGCGATAAGTTGAATGTGAAATGTATGGGCTCAACCCATAGACTGCGTTCAAAACTATCGTTCTTGAGTGATGTAGAGGCAGGCGGAATTCCCGGTGTAGCGGTGGAATGCGTAGATATCGGGAGGAACACCAGTGGCGAAGGCGGCCTGCTGGGCATAAACTGACGCTGA…	Firmicutes	Clostridia_1	Clostridiales	Ruminococcaceae	Termite_cockroach_cluster
ACTCCTACGGGAGGCAGCAGTGGGGAATATTGCACAATGGGCGAAAGCCTGATGCAGCAACGCCGCGTGAGTGATGAAGGTCTTCGGATTGTAAAGCTCTTTGATTAGGGACGATAATGACGGTACCTAAAGAACAAGCCACGGCTAACTACGTGCCAGCAGCCGCGGTAATACGTAGGTGGCAAGCGTTGTCCGGATTTATTGGGCGTAAAGGGAGCGTAGGCGGACCTTTAAGTCAGATGTGAAATACCCAGGGCTCAACCCGGGTGCTGCATTTGATACTGGAGGTCTAGAGTACAGGAGAGGAGAGTGGAATTCCTAGTGTAGCGGTGAAATGCGTAGAGATTAGGAAGAACACCAGTGGCGAAGGCGACTCTCTGGACTGTAACTGACGCTGAG…	Firmicutes	Clostridia_1	Clostridiales	Clostridiaceae_1	Arthropod_cluster
ACTCCTACGGGAGGCAGCAGTGGGGGATATTGCACAATGGGCGAAAGCCTGATGCAGCGACGCCGCGTGAGGGAAGAAGGTTTTCGGATTGTAAACCTCTGTCTTCGAGGACGAAGAAGTGACGGTACTCGAGGAGGAAGCCACGGCTAACTACGTGCCAGCAGCCGCGGTAAAACGTAGGTGGCAAGCGTTGTCCGGAATTACTGGGTGTAAAGGGAGCGCAGGCGGGGCGATAAGTTGAATGTGAAATGTATGGGCTCAACCCATAGACTGCGTTCAAAACTATCGTTCTTGAGTGATGTAGAGGCAGGCGGAATTCCCGGTGTAGCGGTGGAATGCGTAGATATCGGGAGGAACACCAGTGGCGAAGGCGGCCTGCTGGGCATAAACTGACGCTGA…	Firmicutes	Clostridia_1	Clostridiales	Ruminococcaceae	Termite_cockroach_cluster
ACTCCTACGGGAGGCAGCAGTGAGGAATATTGGTCAATGGCCGTAAGGCTGAACCAGCCAAGTAGCGTGAAGGATGACGGCCCTATGGGTTGTAAACTTCTTTTATATGGGAATAACGTTACCCACGTGTGGGTATGTGCATGTACCATGTGAATAAGGATCGGCTAACTCCGTGCCAGCAGCCGCGGTAATACGGAGGATCCGAGCGTTATCCGGATTTATTGGGTTTAAAGGGAGCGTAGGCGGGATCTCAAGTCAGCTGTGAAATGTAGATGCTCAACATCTGCACTGCAGTTGAAACTGGTATTCTTGAGTGCGTAAGAGGTAGGCGGAATTCGTCGTGTAGCGGTGAAATGCATAGATATGACGAAGAACTCCGATTGCGAAGGCAGCTTACTG…	Bacteroidetes	Bacteroidia	Bacteroidales	Bacteroidales_UCG-001	NA
ACTCCTACGGGAGGCAGCAGTGAGGAATATTGGTCAATGGACGCAAGTCTGAACCAGCCATGCCGCGTGCAGGAAGACGGCTCTATGAGTTGTAAACTGCTTTTGTACGAGGGTAAACCCGACTACGTGTAGTCGGCTGAAAGTATCGTACGAATAAGGATCGGCTAACTCCGTGCCAGCAGCCGCGGTAATACGGAGGATCCAAGCGTTATCCGGATTTATTGGGTTTAAAGGGTGCGTAGGCGGTTCGGTAAGTTAGAGGTGAAATTCCGTGGCTCAACCACGGCACTGCCTCTGATACTGCCGGGCTAGAGAATGGTTGCTGTGGGCGGAATGTGTGGTGTAGCGGTGAAATGCTTAGAGATCACACAGAACACCGATTGCGAAGGCAGCTCACAA…	Bacteroidetes	Bacteroidia	Bacteroidales	Rikenellaceae	Alisitpes_IV
ACTCCTACGGGAGGCAGCAGTGAGGAATATTGGTCAATGGCCGTAAGGCTGAACCAGCCAAGTAGCGTGAAGGATGACGGCCCTATGGGTTGTAAACTTCTTTTATATGGGAATAACGTTACCCACGTGTGGGTATGTGCATGTACCATGTGAATAAGGATCGGCTAACTCCGTGCCAGCAGCCGCGGTAATACGGAGGATCCGAGCGTTATCCGGATTTATTGGGTTTAAAGGGAGCGTAGGCGGGATCTCAAGTCAGCTGTGAAATGTAGATGCTCAACATCTGCACTGCAGTTGAAACTGGTATTCTTGAGTGCGTAAGAGGTAGGCGGAATTCGTCGTGTAGCGGTGAAATGCATAGATATGACGAAGAACTCCGATTGCGAAGGCAGCTTACTG…	Bacteroidetes	Bacteroidia	Bacteroidales	Bacteroidales_UCG-001	NA
ACTCCTACGGGAGGCAGCAGTGAGGAATATTCCACAATGGGCGAAAGCCTGATGGAGCAATGCCGCGTGCAGGATGAAGGCCTTCGGGTTGTAAACTGCTTTTATTAGAGAAGAATATGACGGTAACTAATGAATAAGGGTCGGCTAACTACGTGCCAGCAGCCGCGGTCATACGTAGGACCCAAGCGTTATCCGGAGTGACTGGGCGTAAAGAGTTGCGTAGGCGGTTAGATAAGCGAGTGATGAAAACTATCGGCTCAACCGGTAGCCTATTATTCGAACTGTTTAACTCGAGAGTATCAGAGGTCGCTGGAATTCCTTGTGTAGGAGTGAAATCCGTAGATATAAGGAGGAACACCAATGGCGTAGGCAGGCGACTGGGATATTTCTGACGCTAAG…	Patescibacteria	Saccharimonadia	Saccharimonadales	NA	NA
ACTCCTACGGGAGGCAGCAGTGGGGAATATTGGGCAATGGGCGAAAGCCTGACCCAGCAACGCCGCGTGAAGGAAGAAGGTTTTCGGATCGTAAACTTCTATCCCGGGTGAAGATAATGACGGTAGCCCGGAAGGAAGCCCCGGCTAACTACGTGCCAGCAGCCGCGGTAATACGTAGGGGGCAAGCGTTGTCCGGAATGATTGGGCGTAAAGGGCGCGTAGGCGGCTCTGTAAGTCTGGAGTGAAAGTCCTGCTTTTAAGGTGGGAATTGCTTTGGAAACTGTGGAGCTTGAGTGCAGGAGAGGTTAGCGGAATTCCCGGTGTAGCGGTGAAATGCGTAGAGATCGGGAGGAACACCAGTGGCGAAGGCGGCTAACTGGACTGTAACTGACGCTGAGG…	Firmicutes	Clostridia_1	Clostridiales	Lachnospiraceae	Gut_cluster_13
ACTCCTACGGGAGGCAGCAGTGGGGAATTTTGGACAATGGGCGAAAGCCTGATCCAGCAATGCCGCGTGTGTGAAGAAGGCCTTCGGGTTGTAAAGCACTTTTGTCCGGAAAGAAATCCTTGGCTCTAATACAGTCGGGGGATGACGGTACCGGAAGAATAAGCACCGGCTAACTACGTGCCAGCAGCCGCGGTAATACGTAGGGTGCGAGCGTTAATCGGAATTACTGGGCGTAAAGCGTGCGCAGGCGGTTTGCTAAGACCGATGTGAAATCCCCGGGCTCAACCTGGGAACTGCATTGGTGACTGGCAGGCTAGAGTATGGCAGAGGGGGGTAGAATTCCACGTGTAGCAGTGAAATGCGTAGAGATGTGGAGGAATACCGATGGCGAAGGCAGCC…	Proteobacteria	Betaproteobacteria	Rhodocyclales	Rhodocyclaceae_3	Termite_cluster
ACTCCTACGGGAGGCAGCAGTGAGGAATATTGGTCAATGGACGCAAGTCTGAACCAGCCATGCCGCGTGCAGGAAGACGGCTCTATGAGTTGTAAACTGCTTTTGTACGAGGGTAAACCCTGATACGTGTATCAGGCTGAAAGTATCGTACGAATAAGGATCGGCTAACTCCGTGCCAGCAGCCGCGGTAATACGGAGGATCCAAGCGTTATCCGGATTTATTGGGTTTAAAGGGTGCGTAGGCGGTTTGTTAAGTTAGAGGTGAAATTCCGTGGCTCAACCACGGCACTGCCTCTGATACTGGCAGGCTAGAGAATGGTTGCTGTGGGCGGAATGTGTGGTGTAGCGGTGAAATGCTTAGAGATCACACAGAACACCGATTGCGAAGGCAGCTCACAA…	Bacteroidetes	Bacteroidia	Bacteroidales	Rikenellaceae	Alisitpes_IV
ACTCCTACGGGAGGCAGCAGTGGGGAATATTGCGCAATGGGCGAAAGCCTGACGCAGCGACGCCGCGTGAGGGATGAAGGCCTTCGGGTCGTAAACCTCTGTCAGGAGGGAAGAAATGGTGAGGCGCTAATCAGCTTCATCTTGACGGTACCTCCAAAGGAAGCACCGGCTAACTCCGTGCCAGCAGCCGCGGTAATACGGAGGGTGCAAGCGTTAATCGGAATCACTGGGCGTAAAGCGCGCGTAGGCTGCTTTGTAAGTCAGGGGTGAAATCCCACGGCTCAACCGTGGAACTGCCCTTGATACTGCATTGCTTGAGTTTGTGAGAGGATAGCGGAATTCCTGGTGTAGGAGTGAAATCCGTAGAGATCAGGAGGAACATCGGTGGCGAAGGCGGCT…	Proteobacteria	Deltaproteobacteria	Desulfovibrionales	Desulfovibrionaceae	Gut_cluster_3
ACTCCTACGGGAGGCAGCAGTGAGGAATATTGGTCAATGGGGGCAACCCTGAACCAGCCATGCCGCGTGCAGGAAGACGGCTCTATGAGTTGTAAACTGCTTTTATACAGGGATAAATCATGATACGTGTATCATGTTGCAGGTACTGTATGAATAAGGATCGGCTAACTCCGTGCCAGCAGCCGCGGTAATACGGAGGATCCAAGCGTTATCCGGATTTATTGGGTTTAAAGGGTGCGTAGGCGGCACGGTAAGTTAGCGGTGAAATCGCGGGGCTCAACCCCGCAACTGCCGTTAAAACTGCCGAGCTAGAGAGTAGATGCGGTAGGCGGAATGTGTAGTGTAGCGGTGAAATGCTTAGAGATTACACAGAACACCGATTGCGAAGGCAGCTTACCA…	Bacteroidetes	Bacteroidia	Bacteroidales	Rikenellaceae	Alistipes_II
ACTCCTACGGGAGGCAGCAGTGAGGAATATTGGTCAATGGGGGCAACCCTGAACCAGCCATGCCGCGTGCAGGAAGACGGCTCTATGAGTTGTAAACTGCTTTTGTACAGGGATAAATACATATACGTGTATATGTTTGAAGGTACTGTACGAATAAGGATCGGCTAACTCCGTGCCAGCAGCCGCGGTAATACGGAGGATCCGAGCGTTATCCGGATTTATTGGGTTTAAAGGGTGCGTAGGCGGCGAGGTAAGTTAGAGGTGAAATCCCGTGGCTCAACCACGGAACCGCCTCTGATACTGCTTTGCTAGAGAGTAGATGCGGTAGGCGGAATGTGTAGTGTAGCGGTGAAATGCTTAGAGATTACACAGAACACCGATTGCGAAGGCAGCTTACCA…	Bacteroidetes	Bacteroidia	Bacteroidales	Rikenellaceae	Alistipes_II
ACTCCTACGGGAGGCAGCAGTGGGGGATATTGCACAATGGGCGAAAGCCTGATGCAGCGACGCCGCGTGAGGGAAGAAGGTTTTCGGATTGTAAACCTCTGTCTTCGGGGACGATAATGACGGTACCCGAGGAGGAAGCCACGGCTAACTACGTGCCAGCAGCCGCGGTAAAACGTAGGTGGCAAGCGTTGTCCGGAATTACTGGGTGTAAAGGGAGCGCAGGCGGGGTGCCAAGTTGGGCGTGAAAACTATGGGCTCAACCCATAGATTGCGCTCAAAACTGGCGCTCTTGAGTGATGGAGAGGCAGGCGGAATTCCCGGTGTAGCGGTGGAATGCGTAGATATCGGGAGGAACACCAGTGGCGAAGGCGGCCTGCTGGACATTAACTGACGCTGAGG…	Firmicutes	Clostridia_1	Clostridiales	Ruminococcaceae	Termite_cockroach_cluster
ACTCCTACGGGAGGCAGCAGTGGGGAATATTGGACAATGGGCGAAAGCCTGATCCAGCAATGCCGCGTGAGTGATGAAGGCCTTAGGGTTGTAAAGCTCTTTTACCCGGGATGATAATGACAGTACCGGGAGAATAAGCTCCGGCTAACTCCGTGCCAGCAGCCGCGGTAATACGGAGGGAGCTAGCGTTATTCGGAATTACTGGGCGTAAAGCGCACGTAGGCGGCTTTGTAAGTTAGAGGTGAAAGCCTGGAGCTCAACTCCAGAATTGCCTTTAAGACTGCATCGCTTGAATCCAGGAGAGGTGAGTGGAATTCCGAGTGTAGAGGTGAAATTCGTAGATATTCGGAAGAACACCAGTGGCGAAGGCGGCTCACTGGACTGGTATTGACGCTGAGG…	Proteobacteria	Alphaproteobacteria	Rhizobiales_2	Bradyrhizobiaceae	Bosea
ACTCCTACGGGAGGCAGCAGTGGGGAATATTGCACAATGGGCGCAAGCCTGATGCAGCCATGCCGCGTGTATGAAGAAGGCCTTCGGGTTGTAAAGTACTTTCAGCGGGGAGGAAGGGAGTGTGCTTAATACGCACATTCATTGACGTTACCCGCAGAAGAAGCACCGGCTAACTCCGTGCCAGCAGCCGCGGTAATACGGAGGGTGCAAGCGTTAATCGGAATTACTGGGCGTAAAGCGCACGCAGGCGGTCTGTTAAGTCAGATGTGAAATCCCCGGGCTCAACCCGGGAACTGCATTTGAAACTGGCAGGCTTGAGTCTCGTAGAGGGGGGTGGAATTCCAGGTGTAGCGGTGAAATGCGTAGAGATCTGGAGGAATACCGGTGGCGAAGGCGGCC…	Proteobacteria	Gammaproteobacteria_1	Enterobacteriales	Enterobacteriaceae	Escherichia_blattae_cluster
ACTCCTACGGGAGGCAGCAGTAAGGAATATTGGGCAATGGACGCAAGTCTGACCCAGCCATGCCGCGTGAAGGAAGACAGCCCTATGGGTTGTAAACTTCTTTTAACAGAGGATAAAGTCGCGTATGTATACGCGTTTGCAGGTATCTGTTGAATAAGCATCGGCTAACTCCGTGCCAGCAGCCGCGGTAATACGGAGGATGCAAGCGTTATCCGGATTCATTGGGTTTAAAGGGTGCGCAGGCGGACTTTTAAGTCAGCGGTGAAATTCCACGGCTCAACCGTGGCGCTGCCGTTGATACTGGGAGTCTTGAGTGTGATTGAGGTGGGCGGAATGTAGCGTGTAGCGGTGAAATGCATAGATATGCTACAGAACACCAATTGCGAAGGCAGCTCACCA…	Bacteroidetes	Sphingobacteria	Sphingobacteriales_1	SB_1	Termite_cluster
ACTCCTACGGGAGGCAGCAGTGAGGAATATTGGTCAATGGCCGTAAGGCTGAACCAGCCAAGTAGCGTGAAGGATGACGGCCCTATGGGTTGTAAACTTCTTTTATATGGGAATAACGTTACCCACGTGTGGGTATGTGCATGTACCATGTGAATAAGGATCGGCTAACTCCGTGCCAGCAGCCGCGGTAATACGGAGGATCCGAGCGTTATCCGGATTTATTGGGTTTAAAGGGAGCGTAGGCGGGATCTCAAGTCAGCTGTGAAATGTAGATGCTCAACATCTGCACTGCAGTTGAAACTGGTATTCTTGAGTGCGTAAGAGGTAGGCGGAATTCGTCGTGTAGCGGTGAAATGCATAGATATGACGAAGAACTCCGATTGCGAAGGCAGCTTACTG…	Bacteroidetes	Bacteroidia	Bacteroidales	Bacteroidales_UCG-001	NA
ACTCCTACGGGAGGCAGCAGTGGGGAATATTGCACAATGGGGGAAACCCTGATGCAGCGACGCCGCGTGAAGGAAGAAGTATTTCGGTATGTAAACTTCTATCAGCAGGGAAGAAAATGACGGTACCTGACTAAGAAGCCCCGGCTAATTACGTGCCAGCAGCCGCGGTAATACGTAAGGGGCAAGCGTTATCCGGATTTACTGGGTGTAAAGGGAGCGTAGACGGCTGTGTAAGTCAGATGTGAAAGCCCGGGGCTCAACCCCGGGACTGCATTTGAAACTATGCAGCTAGAGTGTCGGAGAGGTAAGCGGAATTCCTAGTGTAGCGGTGAAATGCGTAGATATTAGGAGGAACACCAGTGGCGAAGGCGGCTTACTGGACGATGACTGACGTTGAGG…	Firmicutes	Clostridia_1	Clostridiales	Lachnospiraceae	Robinsoniella_Insects
ACTCCTACGGGAGGCAGCAGTGAGGAATATTGGTCAATGGGGGCAACCCTGAACCAGCCATGCCGCGTGCAGGAAGACGGCTCTATGAGTTGTAAACTGCTTTTGTACAGGGATAAATACATATACGTGTATATGTTTGAAGGTACTGTACGAATAAGGATCGGCTAACTCCGTGCCAGCAGCCGCGGTAATACGGAGGATCCGAGCGTTATCCGGATTTATTGGGTTTAAAGGGTGCGTAGGCGGCGAGGTAAGTTAGAGGTGAAATCCCGTGGCTCAACCACGGAACCGCCTCTGATACTGCTTTGCTAGAGAGTAGATGCGGTAGGCGGAATGTGTAGTGTAGCGGTGAAATGCTTAGAGATTACACAGAACACCGATTGCGAAGGCAGCTTACCA…	Bacteroidetes	Bacteroidia	Bacteroidales	Rikenellaceae	Alistipes_II
ACTCCTACGGGAGGCAGCAGTGGGGAATATTGCACAATGGGGGAAACCCTGATGCAGCGACGCCGCGTGAGTGAAGACGGCCTTCGGGTTGTAAAGCTCTGTTGCGGGGGACGATAATGACGGTACCCCGTGAGGAAGCCACGGCTAACTACGTGCCAGCAGCCGCGGTAATACGTAGGTGGCAAGCGTTGTCCGGAATTACTGGGTGTAAAGGGAGCGTAGGCGGGCAATTAAGTTGGATGTGAAATCTACAGGCTTAACCTGTAGCGTGCATCCAAAACTGAATGTCTTGAGTGATGTAGAGGCAGGCGGAATTCCTAGTGTAGCGGTGAAATGCGTAGATATTAGGAGGAACACCAGTGGCGAAGGCGGCCTGCTGGGCATTAACTGACGCTGAGG…	Firmicutes	Clostridia_1	Clostridiales	Ruminococcaceae	Insect_cluster
ACTCCTACGGGAGGCAGCAGTGGGGAATATTGCACAATGGGCGCAAGCCTGATGCAGCCATGCCGCGTGTATGAAGAAGGCCTTCGGGTTGTAAAGTACTTTCAGCGGGGAGGAAGGGAGTGTGCTTAATACGCACATTCATTGACGTTACCCGCAGAAGAAGCACCGGCTAACTCCGTGCCAGCAGCCGCGGTAATACGGAGGGTGCAAGCGTTAATCGGAATTACTGGGCGTAAAGCGCACGCAGGCGGTCTGTTAAGTCAGATGTGAAATCCCCGGGCTCAACCCGGGAACTGCATTTGAAACTGGCAGGCTTGAGTCTCGTAGAGGGGGGTGGAATTCCAGGTGTAGCGGTGAAATGCGTAGAGATCTGGAGGAATACCGGTGGCGAAGGCGGCC…	Proteobacteria	Gammaproteobacteria_1	Enterobacteriales	Enterobacteriaceae	Escherichia_blattae_cluster
ACTCCTACGGGAGGCAGCAGTGGGGAATATTGCACAATGGGCGCAAGCCTGATGCAGCCATGCCGCGTGTATGAAGAAGGCCTTCGGGTTGTAAAGTACTTTCAGCGAGGAGGAAGGCATTGTGGTTAATAACCGCAGTGATTGACGTTACTCGCAGAAGAAGCACCGGCTAACTCCGTGCCAGCAGCCGCGGTAATACGGAGGGTGCAAGCGTTAATCGGAATTACTGGGCGTAAAGCGCACGCAGGCGGTCTGTCAAGTCGGATGTGAAATCCCCGGGCTCAACCTGGGAACTGCATTCGAAACTGGCAGGCTAGAGTCTTGTAGAGGGGGGTAGAATTCCAGGTGTAGCGGTGAAATGCGTAGAGATCTGGAGGAATACCGGTGGCGAAGGCGGCC…	Proteobacteria	Gammaproteobacteria_1	Enterobacteriales	Enterobacteriaceae	Escherichia_blattae_cluster
ACTCCTACGGGAGGCAGCAGTGGGGAATATTGCACAATGGGGGAAACCCTGATGCAGCAACGCCGCGTGGAGGATGACGCATTTCGGTGTGTAAACTCCTTTTATTTGGGAAGATAATGACGGTACCAAATGAATAAGCACCGGCTAACTCCGTGCCAGCAGCCGCGGTAATACGGAGGGTGCAAGCGTTACTCGGAATCACTGGGCGTAAAGGGTGCGTAGGCGGGTTATCAAGTCTTAAGTGAAATCCAACAGCTTAACTGTTGAACTGCTTAGGAAACTGGCAACCTAGAGTAAGGGAGAGGTAGATGGAATTGGTGGTGTAGGGGTAAAATCCGTAGATATCACCAGGAATACTCATTGCGAAGGCGATCTACTGGAACTTAACTGACGCTGAGG…	Proteobacteria	Epsilonproteobacteria	Campylobacterales	Campylobacteraceae	Sulfurospirillum
ACTCCTACGGGAGGCAGCAGTGGGGAATATTGCACAATGGGCGAAAGCCTGATGCAGCAACGCCGCGTGAGTGATGAAGGTCTTCGGATTGTAAAGCTCTTTGATTAGGGACGATAATGACGGTACCTAAAGAACAAGCCACGGCTAACTACGTGCCAGCAGCCGCGGTAATACGTAGGTGGCAAGCGTTGTCCGGATTTATTGGGCGTAAAGGGAGCGTAGGCGGACCTTTAAGTCAGATGTGAAATACCCAGGGCTCAACCCGGGTGCTGCATTTGATACTGGAGGTCTAGAGTACAGGAGAGGAGAGTGGAATTCCTAGTGTAGCGGTGAAATGCGTAGAGATTAGGAAGAACACCAGTGGCGAAGGCGACTCTCTGGACTGTAACTGACGCTGAG…	Firmicutes	Clostridia_1	Clostridiales	Clostridiaceae_1	Arthropod_cluster
ACTCCTACGGGAGGCAGCAGTGGGGAATATTGCACAATGGGGGAAACCCTGATGCAGCAACGCCGCGTGGAGGATGACGCATTTCGGTGTGTAAACTCCTTTTATTTGGGAAGATAATGACGGTACCAAATGAATAAGCACCGGCTAACTCCGTGCCAGCAGCCGCGGTAATACGGAGGGTGCAAGCGTTACTCGGAATCACTGGGCGTAAAGGGTGCGTAGGCGGGTTATCAAGTCTTAAGTGAAATCCAACAGCTTAACTGTTGAACTGCTTAGGAAACTGGCAACCTAGAGTAAGGGAGAGGTAGATGGAATTGGTGGTGTAGGGGTAAAATCCGTAGATATCACCAGGAATACTCATTGCGAAGGCGATCTACTGGAACTTAACTGACGCTGAGG…	Proteobacteria	Epsilonproteobacteria	Campylobacterales	Campylobacteraceae	Sulfurospirillum
ACTCCTACGGGAGGCAGCAGTGGGGAATATTGCACAATGGGCGCAAGCCTGATGCAGCCATGCCGCGTGTATGAAGAAGGCCTTCGGGTTGTAAAGTACTTTCAGCGGGGAGGAAGGGAGTGTGTTTAATACGCACATTCATTGACGTTACCCGCAGAAGAAGCACCGGCTAACTCCGTGCCAGCAGCCGCGGTAATACGGAGGGTGCAAGCGTTAATCGGAATTACTGGGCGTAAAGCGCACGCAGGCGGTCTGTTAAGTCAGATGTGAAATCCCCGGGCTCAACCCGGGAACTGCATTTGAAACTGGCAGGCTTGAGTCTCGTAGAGGGGGGTGGAATTCCAGGTGTAGCGGTGAAATGCGTAGAGATCTGGAGGAATACCGGTGGCGAAGGCGGCC…	Proteobacteria	Gammaproteobacteria_1	Enterobacteriales	Enterobacteriaceae	Escherichia_blattae_cluster
ACTCCTACGGGAGGCAGCAGTGGGGAATTTTGCGCAATGGGCGAAAGCCTGACGCAGCAACGCCGCGTGCGGGATGAAGGCCTTCGGGTTGTAAACCGCTTTCAGTAGGGAAGATTATGACGGTACCTACAGAAGAAGCTCCGGCTAACTACGTGCCAGCAGCCGCGGTAATACGTAGGGAGCAAGCGTTATCCGGATTCATTGGGCGTAAAGAGCGCGTAGGCGGCTTGTTAAGCAAGGTGTTAAATCTGAGGGCTCAACCCCCAGCCGCACCTTGAACTGGCAGGCTTGAGTTTGGTAGAGGAAGGTGGAATTCCCAGTGTAGCGGTGGAATGCGCAGATATTGGGAAGAACACCGGTGGCGAAGGCGGCCTTCTGGGCCATAACTGACGCTGAGGC…	Actinobacteria	Actinobacteria	Coriobacteriales	Coriobacteriaceae	Uncultured_10
ACTCCTACGGGAGGCAGCAGTGGGGAATATTGCACAATGGGCGCAAGCCTGATGCAGCCATGCCGCGTGTATGAAGAAGGCCTTCGGGTTGTAAAGTACTTTCAGCGAGGAGGAAGGCATTGTGGTTAATAACCGCAGTGATTGACGTTACTCGCAGAAGAAGCACCGGCTAACTCCGTGCCAGCAGCCGCGGTAATACGGAGGGTGCAAGCGTTAATCGGAATTACTGGGCGTAAAGCGCACGCAGGCGGTCTGTCAAGTCGGATGTGAAATCCCCGGGCTCAACCTGGGAACTGCATTCGAAACTGGCAGGCTAGAGTCTTGTAGAGGGGGGTAGAATTCCAGGTGTAGCGGTGAAATGCGTAGAGATCTGGAGGAATACCGGTGGCGAAGGCGGCC…	Proteobacteria	Gammaproteobacteria_1	Enterobacteriales	Enterobacteriaceae	Escherichia_blattae_cluster
ACTCCTACGGGAGGCAGCAGTAAGGAATATTGGGCAATGGACGCAAGTCTGACCCAGCCATGCCGCGTGAAGGAAGACAGCCCTATGGGTTGTAAACTTCTTTTAACAGAGGATAAAGTCGCGTATGTATACGCGTTTGCAGGTATCTGTTGAATAAGCATCGGCTAACTCCGTGCCAGCAGCCGCGGTAATACGGAGGATGCAAGCGTTATCCGGATTCATTGGGTTTAAAGGGTGCGCAGGCGGACTTTTAAGTCAGCGGTGAAATTCCACGGCTCAACCGTGGCGCTGCCGTTGATACTGGGAGTCTTGAGTGTGATTGAGGTGGGCGGAATGTAGCGTGTAGCGGTGAAATGCATAGATATGCTACAGAACACCAATTGCGAAGGCAGCTCACCA…	Bacteroidetes	Sphingobacteria	Sphingobacteriales_1	SB_1	Termite_cluster
ACTCCTACGGGAGGCAGCAGTGAGGAATATTGGTCAATGGGGGCAACCCTGAACCAGCCATGCCGCGTGCAGGAAGACGGCTCTATGAGTTGTAAACTGCTTTTGTACAGGGATAAATACATATACGTGTATATGTTTGAAGGTACTGTACGAATAAGGATCGGCTAACTCCGTGCCAGCAGCCGCGGTAATACGGAGGATCCGAGCGTTATCCGGATTTATTGGGTTTAAAGGGTGCGTAGGCGGCGAGGTAAGTTAGAGGTGAAATCCCGTGGCTCAACCACGGAACCGCCTCTGATACTGCTTTGCTAGAGAGTAGATGCGGTAGGCGGAATGTGTAGTGTAGCGGTGAAATGCTTAGAGATTACACAGAACACCGATTGCGAAGGCAGCTTACCA…	Bacteroidetes	Bacteroidia	Bacteroidales	Rikenellaceae	Alistipes_II
ACTCCTACGGGAGGCAGCAGTGAGGAATATTGGTCAATGGACGCAAGTCTGAACCAGCCATGCCGCGTGCAGGAAGACGGCTCTATGAGTTGTAAACTGCTTTTGTACGAGGGTAAACCCGACTACGTGTAGTCGGCTGAAAGTATCGTACGAATAAGGATCGGCTAACTCCGTGCCAGCAGCCGCGGTAATACGGAGGATCCAAGCGTTATCCGGATTTATTGGGTTTAAAGGGTGCGTAGGCGGTTCGGTAAGTTAGAGGTGAAATTCCGTGGCTCAACCACGGCACTGCCTCTGATACTGCCGGGCTAGAGAATGGTTGCTGTGGGCGGAATGTGTGGTGTAGCGGTGAAATGCTTAGAGATCACACAGAACACCGATTGCGAAGGCAGCTCACAA…	Bacteroidetes	Bacteroidia	Bacteroidales	Rikenellaceae	Alisitpes_IV
ACTCCTACGGGAGGCAGCAGTGGGGAATATTGGGCAATGGGCGAAAGCCTGACCCAGCAACGCCGCGTGAAGGAAGAAGGTTTTCGGATCGTAAACTTCTATCCCGGGTGAAGATAATGACGGTAGCCCGGAAGGAAGCCCCGGCTAACTACGTGCCAGCAGCCGCGGTAATACGTAGGGGGCAAGCGTTGTCCGGAATGATTGGGCGTAAAGGGCGCGTAGGCGGCTCTGTAAGTCTGGAGTGAAAGTCCTGCTTTTAAGGTGGGAATTGCTTTGGAAACTGTGGAGCTTGAGTGCAGGAGAGGTTAGCGGAATTCCCGGTGTAGCGGTGAAATGCGTAGAGATCGGGAGGAACACCAGTGGCGAAGGCGGCTAACTGGACTGTAACTGACGCTGAGG…	Firmicutes	Clostridia_1	Clostridiales	Lachnospiraceae	Gut_cluster_13
ACTCCTACGGGAGGCAGCAGTGGGGAATATTGCACAATGGGCGAAAGCCTGATGCAGCAACGCCGCGTGAGTGATGAAGGTCTTCGGATTGTAAAGCTCTTTGATTAGGGACGATAATGACGGTACCTAAAGAACAAGCCACGGCTAACTACGTGCCAGCAGCCGCGGTAATACGTAGGTGGCAAGCGTTGTCCGGATTTATTGGGCGTAAAGGGAGCGTAGGCGGACCTTTAAGTCAGATGTGAAATACCCAGGGCTCAACCCGGGTGCTGCATTTGATACTGGAGGTCTAGAGTACAGGAGAGGAGAGTGGAATTCCTAGTGTAGCGGTGAAATGCGTAGAGATTAGGAAGAACACCAGTGGCGAAGGCGACTCTCTGGACTGTAACTGACGCTGAG…	Firmicutes	Clostridia_1	Clostridiales	Clostridiaceae_1	Arthropod_cluster
ACTCCTACGGGAGGCAGCAGTGAGGAATATTGGTCAATGGACGCAAGTCTGAACCAGCCATGCCGCGTGCAGGAAGACGGCTCTATGAGTTGTAAACTGCTTTTGTGCGAGGGTAAACCCCGGTACGTGTACCGGGCTGAAAGTATCGTACGAATAAGGATCGGCTAACTCCGTGCCAGCAGCCGCGGTAATACGGAGGATCCAAGCGTTATCCGGATTTATTGGGTTTAAAGGGTGCGTAGGCGGTTTGTTAAGTTAGAGGTGAAATCCCGTGGCTCAACCACGGAACTGCCTCTGATACTGGCAGGCTAGAGAATGGTTGCTGTGGGCGGAATGTGTGGTGTAGCGGTGAAATGCTTAGAGATCACACAGAACACCGATTGCGAAGGCAGCTCACAA…	Bacteroidetes	Bacteroidia	Bacteroidales	Rikenellaceae	Alisitpes_IV
ACTCCTACGGGAGGCAGCAGTGGGGAATATTGGGCAATGGGCGAAAGCCTGACCCAGCAACGCCGCGTGAAGGAAGAAGGTTTTCGGATCGTAAACTTCTATCCCGGGTGAAGATAATGACGGTAGCCCGGAAGGAAGCCCCGGCTAACTACGTGCCAGCAGCCGCGGTAATACGTAGGGGGCAAGCGTTGTCCGGAATGATTGGGCGTAAAGGGCGCGTAGGCGGCTCTGTAAGTCTGGAGTGAAAGTCCTGCTTTTAAGGTGGGAATTGCTTTGGAAACTGTGGAGCTTGAGTGCAGGAGAGGTTAGCGGAATTCCCGGTGTAGCGGTGAAATGCGTAGAGATCGGGAGGAACACCAGTGGCGAAGGCGGCTAACTGGACTGTAACTGACGCTGAGG…	Firmicutes	Clostridia_1	Clostridiales	Lachnospiraceae	Gut_cluster_13
ACTCCTACGGGAGGCAGCAGTGGGGAATATTGCACAATGGGCGCAAGCCTGATGCAGCCATGCCGCGTGTATGAAGAAGGCCTTCGGGTTGTAAAGTACTTTCAGCGGGGAGGAAGGGAGTGTGTTTAATACGCACATTCATTGACGTTACCCGCAGAAGAAGCACCGGCTAACTCCGTGCCAGCAGCCGCGGTAATACGGAGGGTGCAAGCGTTAATCGGAATTACTGGGCGTAAAGCGCACGCAGGCGGTCTGTTAAGTCAGATGTGAAATCCCCGGGCTCAACCCGGGAACTGCATTTGAAACTGGCAGGCTTGAGTCTCGTAGAGGGGGGTGGAATTCCAGGTGTAGCGGTGAAATGCGTAGAGATCTGGAGGAATACCGGTGGCGAAGGCGGCC…	Proteobacteria	Gammaproteobacteria_1	Enterobacteriales	Enterobacteriaceae	Escherichia_blattae_cluster
ACTCCTACGGGAGGCAGCAGTGAGGAATATTGGTCAATGGACGCAAGTCTGAACCAGCCATGCCGCGTGCAGGAAGACGGCTCTATGAGTTGTAAACTGCTTTTGTACGAGGGTAAACCCTGATACGTGTATCAGGCTGAAAGTATCGTACGAATAAGGATCGGCTAACTCCGTGCCAGCAGCCGCGGTAATACGGAGGATCCAAGCGTTATCCGGATTTATTGGGTTTAAAGGGTGCGTAGGCGGTTTGTTAAGTTAGAGGTGAAATTCCGTGGCTCAACCACGGCACTGCCTCTGATACTGGCAGGCTAGAGAATGGTTGCTGTGGGCGGAATGTGTGGTGTAGCGGTGAAATGCTTAGAGATCACACAGAACACCGATTGCGAAGGCAGCTCACAA…	Bacteroidetes	Bacteroidia	Bacteroidales	Rikenellaceae	Alisitpes_IV
ACTCCTACGGGAGGCAGCAGTGGGGAATATTGGGCAATGGGCGAAAGCCTGACCCAGCAACGCCGCGTGAAGGAAGAAGGTTTTCGGATCGTAAACTTCTATCCCGGGTGAAGATAATGACGGTAGCCCGGAAGGAAGCCCCGGCTAACTACGTGCCAGCAGCCGCGGTAATACGTAGGGGGCAAGCGTTGTCCGGAATGATTGGGCGTAAAGGGCGCGTAGGCGGCTCTGTAAGTCTGGAGTGAAAGTCCTGCTTTTAAGGTGGGAATTGCTTTGGAAACTGTGGAGCTTGAGTGCAGGAGAGGTTAGCGGAATTCCCGGTGTAGCGGTGAAATGCGTAGAGATCGGGAGGAACACCAGTGGCGAAGGCGGCTAACTGGACTGTAACTGACGCTGAGG…	Firmicutes	Clostridia_1	Clostridiales	Lachnospiraceae	Gut_cluster_13
ACTCCTACGGGAGGCAGCAGTGGGGAATATTGGGCAATGGGCGAAAGCCTGACCCAGCAACGCCGCGTGAGTGAAGAAGGCCTTCGGGTTGTAAAACTCTGTCGCAGGGGACGAAAGAAATGACGGTACCCTGCAAGGAAGCCCCGGCTAACTACGTGCCAGCAGCCGCGGTAATACGTAGGGGGCGAGCGTTGTCCGGAATTACTGGGCGTAAAGGGAGCGTAGGCGGCTGTTTAAGTTGGATGTGAAATACCCGGGCTTAACTTGGGGGGTGCATTCAAAACTGGGCAGCTAGAGTGCAGGAGAGGGAAGCGGAATTCCTAGTGTAGCGGTGAAATGCGTAGATATTAGGAGGAACACCAGTGGCGAAGGCGGCTTTCTGGACTGTAACTGACGCTG…	Firmicutes	Clostridia_1	Clostridiales	Clostridiaceae_1	Arthropod_cluster
ACTCCTACGGGAGGCAGCAGTGAGGAATATTGGTCAATGGGGGCAACCCTGAACCAGCCATGCCGCGTGCAGGAAGACGGCTCTATGAGTTGTAAACTGCTTTTATACGGGGATAAATCAGAGCACGCGTGCTCTGTTGAAGGTACCGTAAGAATAAGGATCGGCTAACTCCGTGCCAGCAGCCGCGGTAATACGGAGGATCCAAGCGTTATCCGGATTTATTGGGTTTAAAGGGTGCGTAGGCGGCACGGTAAGTTAGCGGTGAAATCTCGGGGCTTAACCCCGAAATTGCCGTTAAAACTGCCGGGCTAGAGATTAGATGCGGTAGGCGGAATGTGTGGTGTAGCGGTGAAATGCTTAGAGATCACACAGAACCCCGATTGCGAAGGCAGCTTACCA…	Bacteroidetes	Bacteroidia	Bacteroidales	Rikenellaceae	Alistipes_II
ACTCCTACGGGAGGCAGCAGTGGGGAATATTGCACAATGGACGGAAGTCTGATGCAGCAACGCCGCGTGGAGGATGACACATTTCGGTGCGTAAACTCCTTTTATGTAAGAAGATAATGACGGTATTATATGAATAAGCACCGGCTAACTCCGTGCCAGCAGCCGCGGTAATACGGGGGGTGCAAGCGTTACTCGGAATCACTGGGCGTAAAGAGCGTGTAGGCGGATTGATAAGTTTGAAGTGAAATCCTATAGCTTAACTATAGAACTGCTTTGAAAACTGTTAGTCTAGAATGTGGGAGAGGTAGATGGAATTTCTGGTGTAGGGGTAAAATCCGTAGAGATCAGAAGGAATACCGATTGCGAAGGCGATCTACTGGAACAATATTGACGCTGAGA…	Proteobacteria	Epsilonproteobacteria	Campylobacterales	Campylobacteraceae	Arcobacter
ACTCCTACGGGAGGCAGCAGTGAGGAATATTGGTCAATGGGGGCAACCCTGAACCAGCCATGCCGCGTGCAGGAAGACGGCTCTATGAGTTGTAAACTGCTTTTATACAGGGATAAATCATGATACGTGTATCATGTTGCAGGTACTGTATGAATAAGGATCGGCTAACTCCGTGCCAGCAGCCGCGGTAATACGGAGGATCCAAGCGTTATCCGGATTTATTGGGTTTAAAGGGTGCGTAGGCGGCACGGTAAGTTAGCGGTGAAATCGCGGGGCTCAACCCCGCAACTGCCGTTAAAACTGCCGAGCTAGAGAGTAGATGCGGTAGGCGGAATGTGTAGTGTAGCGGTGAAATGCTTAGAGATTACACAGAACACCGATTGCGAAGGCAGCTTACCA…	Bacteroidetes	Bacteroidia	Bacteroidales	Rikenellaceae	Alistipes_II
ACTCCTACGGGAGGCAGCAGTAGGGAATCTTCCGCAATGGACGAAAGTCTGACGGAGCAACGCCGCGTGAGTGATGAAGGCTTTCGGGTCGTAAAACTCTGTTGTTAGGGAAGAACAAGTGCTAGTTGAATAAGCTGGCACCTTGACGGTACCTAACCAGAAAGCCACGGCTAACTACGTGCCAGCAGCCGCGGTAATACGTAGGTGGCAAGCGTTATCCGGAATTATTGGGCGTAAAGCGCGCGCAGGTGGTTTCTTAAGTCTGATGTGAAAGCCCACGGCTCAACCGTGGAGGGTCATTGGAAACTGGGAGACTTGAGTGCAGAAGAGGAAAGTGGAATTCCATGTGTAGCGGTGAAATGCGTAGAGATATGGAGGAACACCAGTGGCGAAGGCGAC…	Firmicutes	Bacilli	Bacillales	Bacillaceae	Bacillus
ACTCCTACGGGAGGCAGCAGTGGGGAATATTGCACAATGGGCGCAAGCCTGATGCAGCCATGCCGCGTGTATGAAGAAGGCCTTCGGGTTGTAAAGTACTTTCAGCGGGGAGGAAGGGAGTGTGCTTAATACGCACATTCATTGACGTTACCCGCAGAAGAAGCACCGGCTAACTCCGTGCCAGCAGCCGCGGTAATACGGAGGGTGCAAGCGTTAATCGGAATTACTGGGCGTAAAGCGCACGCAGGCGGTCTGTTAAGTCAGATGTGAAATCCCCGGGCTCAACCCGGGAACTGCATTTGAAACTGGCAGGCTTGAGTCTCGTAGAGGGGGGTGGAATTCCAGGTGTAGCGGTGAAATGCGTAGAGATCTGGAGGAATACCGGTGGCGAAGGCGGCC…	Proteobacteria	Gammaproteobacteria_1	Enterobacteriales	Enterobacteriaceae	Escherichia_blattae_cluster
ACTCCTACGGGAGGCAGCAGTAGGGAATCTTCCGCAATGGACGAAAGTCTGACGGAGCAACGCCGCGTGAGTGATGAAGGCTTTCGGGTCGTAAAACTCTGTTGTTAGGGAAGAACAAGTGCTAGTTGAATAAGCTGGCACCTTGACGGTACCTAACCAGAAAGCCACGGCTAACTACGTGCCAGCAGCCGCGGTAATACGTAGGTGGCAAGCGTTATCCGGAATTATTGGGCGTAAAGCGCGCGCAGGTGGTTTCTTAAGTCTGATGTGAAAGCCCACGGCTCAACCGTGGAGGGTCATTGGAAACTGGGAGACTTGAGTGCAGAAGAGGAAAGTGGAATTCCATGTGTAGCGGTGAAATGCGTAGAGATATGGAGGAACACCAGTGGCGAAGGCGAC…	Firmicutes	Bacilli	Bacillales	Bacillaceae	Bacillus
ACTCCTACGGGAGGCAGCAGTGAGGAATATTGGTCAATGGACGCAAGTCTGAACCAGCCATGCCGCGTGCAGGAAGACGGCTCTATGAGTTGTAAACTGCTTTTGTACGAGGGTAAACCCTGATACGTGTATCAGGCTGAAAGTATCGTACGAATAAGGATCGGCTAACTCCGTGCCAGCAGCCGCGGTAATACGGAGGATCCAAGCGTTATCCGGATTTATTGGGTTTAAAGGGTGCGTAGGCGGTTTGTTAAGTTAGAGGTGAAATCCCGTGGCTCAACCACGGAACTGCCTCTGATACTGGCAGGCTAGAGAATGGTTGCTGTGGGCGGAATGTGTGGTGTAGCGGTGAAATGCTTAGAGATCACACAGAACACCGATTGCGAAGGCAGCTCACAA…	Bacteroidetes	Bacteroidia	Bacteroidales	Rikenellaceae	Alisitpes_IV
ACTCCTACGGGAGGCAGCAGTGAGGAATATTGGTCAATGGGGGCAACCCTGAACCAGCCATGCCGCGTGCAGGAAGACGGCTCTATGAGTTGTAAACTGCTTTTGTACAGGGATAAATACATATACGTGTATATGTTTGAAGGTACTGTACGAATAAGGATCGGCTAACTCCGTGCCAGCAGCCGCGGTAATACGGAGGATCCGAGCGTTATCCGGATTTATTGGGTTTAAAGGGTGCGTAGGCGGCGAGGTAAGTTAGAGGTGAAATCCCGTGGCTCAACCACGGAACCGCCTCTGATACTGCTTTGCTAGAGAGTAGATGCGGTAGGCGGAATGTGTAGTGTAGCGGTGAAATGCTTAGAGATTACACAGAACACCGATTGCGAAGGCAGCTTACCA…	Bacteroidetes	Bacteroidia	Bacteroidales	Rikenellaceae	Alistipes_II
ACTCCTACGGGAGGCAGCAGTGAGGAATATTGGTCAATGGGGGCAACCCTGAACCAGCCATGCCGCGTGCAGGAAGACGGCTCTATGAGTTGTAAACTGCTTTTGTACAGGGATAAATACATATACGTGTATATGTTTGAAGGTACTGTACGAATAAGGATCGGCTAACTCCGTGCCAGCAGCCGCGGTAATACGGAGGATCCGAGCGTTATCCGGATTTATTGGGTTTAAAGGGTGCGTAGGCGGCGAGGTAAGTTAGAGGTGAAATCCCGTGGCTCAACCACGGAACCGCCTCTGATACTGCTTTGCTAGAGAGTAGATGCGGTAGGCGGAATGTGTAGTGTAGCGGTGAAATGCTTAGAGATTACACAGAACACCGATTGCGAAGGCAGCTTACCA…	Bacteroidetes	Bacteroidia	Bacteroidales	Rikenellaceae	Alistipes_II
ACTCCTACGGGAGGCAGCAGTGGGGAATATTGCACAATGGGGGAAACCCTGATGCAGCAACGCCGCGTGGAGGATGACGCATTTCGGTGTGTAAACTCCTTTTATTTGGGAAGATAATGACGGTACCAAATGAATAAGCACCGGCTAACTCCGTGCCAGCAGCCGCGGTAATACGGAGGGTGCAAGCGTTACTCGGAATCACTGGGCGTAAAGGGTGCGTAGGCGGGTTATCAAGTCTTAAGTGAAATCCAACAGCTTAACTGTTGAACTGCTTAGGAAACTGGCAACCTAGAGTAAGGGAGAGGTAGATGGAATTGGTGGTGTAGGGGTAAAATCCGTAGATATCACCAGGAATACTCATTGCGAAGGCGATCTACTGGAACTTAACTGACGCTGAGG…	Proteobacteria	Epsilonproteobacteria	Campylobacterales	Campylobacteraceae	Sulfurospirillum
ACTCCTACGGGAGGCAGCAGTGAGGAATCTTCCACAATGGGCGAAAGCCTGATGGAGCAATGCCGCGTGCAGGATGAAGGCCTTCGGGTTGTAAACTGCTTTTATTAGAGAAGAATATGACGGTAACTAATGAATAAGGGTCGGCTAACTACGTGCCAGCAGCCGCGGTCATACGTAGGACCCAAGCGTTATCCGGAGTGACTGGGCGTAAAGAGTTGCGTAGGCGGCGTGCTAAGCGAGTAGTGAAAATTATCGGCTCAACCGATAACCTATTATTCGAACTGGCATGCTCGAGAATAGTAGAGGTAGCTGGAATTACTAGTGTAGGAGTGGAATCCGTAGATATTAGTAGGAACACCAATGGCGTAGGCAGGCTACTGGACTATTTCTGACGCTAAG…	Patescibacteria	Saccharimonadia	Saccharimonadales	NA	NA
ACTCCTACGGGAGGCAGCAGTGGGGGATATTGCACAATGGGCGAAAGCCTGATGCAGCGACGCCGCGTGAGGGAAGAAGGTTTTCGGATTGTAAACCTCTGTCTTCGGGGACGATAATGACGGTACCCGAGGAGGAAGCCACGGCTAACTACGTGCCAGCAGCCGCGGTAAAACGTAGGTGGCAAGCGTTGTCCGGAATTACTGGGTGTAAAGGGAGCGCAGGCGGGGTGCCAAGTTGGGCGTGAAAACTATGGGCTCAACCCATAGATTGCGCTCAAAACTGGCGCTCTTGAGTGATGGAGAGGCAGGCGGAATTCCCGGTGTAGCGGTGGAATGCGTAGATATCGGGAGGAACACCAGTGGCGAAGGCGGCCTGCTGGACATTAACTGACGCTGAGG…	Firmicutes	Clostridia_1	Clostridiales	Ruminococcaceae	Termite_cockroach_cluster
ACTCCTACGGGAGGCAGCAGTGGGGAATATTGCACAATGGGCGCAAGCCTGATGCAGCCATGCCGCGTGTATGAAGAAGGCCTTCGGGTTGTAAAGTACTTTCAGCGAGGAGGAAGGCATTGTGGTTAATAACCGCAGTGATTGACGTTACTCGCAGAAGAAGCACCGGCTAACTCCGTGCCAGCAGCCGCGGTAATACGGAGGGTGCAAGCGTTAATCGGAATTACTGGGCGTAAAGCGCACGCAGGCGGTCTGTCAAGTCGGATGTGAAATCCCCGGGCTCAACCTGGGAACTGCATTCGAAACTGGCAGGCTAGAGTCTTGTAGAGGGGGGTAGAATTCCAGGTGTAGCGGTGAAATGCGTAGAGATCTGGAGGAATACCGGTGGCGAAGGCGGCC…	Proteobacteria	Gammaproteobacteria_1	Enterobacteriales	Enterobacteriaceae	Escherichia_blattae_cluster
ACTCCTACGGGAGGCAGCAGTGGGGAATATTGCACAATGGGGGAAACCCTGATGCAGCAACGCCGCGTGGAGGATGACGCATTTCGGTGTGTAAACTCCTTTTATTTGGGAAGATAATGACGGTACCAAATGAATAAGCACCGGCTAACTCCGTGCCAGCAGCCGCGGTAATACGGAGGGTGCAAGCGTTACTCGGAATCACTGGGCGTAAAGGGTGCGTAGGCGGGTTATCAAGTCTTAAGTGAAATCCAACAGCTTAACTGTTGAACTGCTTAGGAAACTGGCAACCTAGAGTAAGGGAGAGGTAGATGGAATTGGTGGTGTAGGGGTAAAATCCGTAGATATCACCAGGAATACTCATTGCGAAGGCGATCTACTGGAACTTAACTGACGCTGAGG…	Proteobacteria	Epsilonproteobacteria	Campylobacterales	Campylobacteraceae	Sulfurospirillum
ACTCCTACGGGAGGCAGCAGTAAGGAATATTGGGCAATGGACGCAAGTCTGACCCAGCCATGCCGCGTGAAGGAAGACAGCCCTATGGGTTGTAAACTTCTTTTAACAGAGGATAAAGTCGCGTATGTATACGCGTTTGCAGGTATCTGTTGAATAAGCATCGGCTAACTCCGTGCCAGCAGCCGCGGTAATACGGAGGATGCAAGCGTTATCCGGATTCATTGGGTTTAAAGGGTGCGCAGGCGGACTTTTAAGTCAGCGGTGAAATTCCACGGCTCAACCGTGGCGCTGCCGTTGATACTGGGAGTCTTGAGTGTGATTGAGGTGGGCGGAATGTAGCGTGTAGCGGTGAAATGCATAGATATGCTACAGAACACCAATTGCGAAGGCAGCTCACCA…	Bacteroidetes	Sphingobacteria	Sphingobacteriales_1	SB_1	Termite_cluster
ACTCCTACGGGAGGCAGCAGTAAGGAATATTGCGCAATGGATGAAAGTCTGACGCAGCAACTCCGCGTGATGGACGAAGGTTTTCGGATTGTAAACATCTTTTATCAGAGAAGAAAAAATTAAAATTGACGGTATCTGATGAATAAGCTCCGGCTAAATATGTGCCAGCAGCCGCGGTAATACATATGGAGCGAGCGTTACTCGGAATCACTGGGCGTAAAGGGTGCGTAGGCTGTTTAATAAGTCGTTGTTTTAACTTACGGGCTTAACCTGTACTGTGATAGCGATACTATTAGACTTGAGTACTTGAGGGGTAAATGGAATTCTCGGTGTAGCGGTGGAATGCGTAGATATCGAGAAGAACACCAATGGCGAAGGCAGTTTACTGGCAAGATACTG…	Candidate_phylum_TG3	Subphylum_2	incertae_sedis	Termite_cluster_IV	Subcluster_IVb
ACTCCTACGGGAGGCAGCAGTGAGGAATATTGGTCAATGGACGCAAGTCTGAACCAGCCATGCCGCGTGCAGGAAGACGGCTCTATGAGTTGTAAACTGCTTTTGTACGAGGGTAAACCCGACTACGTGTAGTCGGCTGAAAGTATCGTACGAATAAGGATCGGCTAACTCCGTGCCAGCAGCCGCGGTAATACGGAGGATCCAAGCGTTATCCGGATTTATTGGGTTTAAAGGGTGCGTAGGCGGTTCGGTAAGTTAGAGGTGAAATTCCGTGGCTCAACCACGGCACTGCCTCTGATACTGCCGGGCTAGAGAATGGTTGCTGTGGGCGGAATGTGTGGTGTAGCGGTGAAATGCTTAGAGATCACACAGAACACCGATTGCGAAGGCAGCTCACAA…	Bacteroidetes	Bacteroidia	Bacteroidales	Rikenellaceae	Alisitpes_IV
ACTCCTACGGGAGGCAGCAGTGAGGAATATTGGTCAATGGCCGTAAGGCTGAACCAGCCAAGTAGCGTGAAGGATGACGGCCCTATGGGTTGTAAACTTCTTTTATATGGGAATAACGTTACCCACGTGTGGGTATGTGCATGTACCATGTGAATAAGGATCGGCTAACTCCGTGCCAGCAGCCGCGGTAATACGGAGGATCCGAGCGTTATCCGGATTTATTGGGTTTAAAGGGAGCGTAGGCGGGATCTCAAGTCAGCTGTGAAATGTAGATGCTCAACATCTGCACTGCAGTTGAAACTGGTATTCTTGAGTGCGTAAGAGGTAGGCGGAATTCGTCGTGTAGCGGTGAAATGCATAGATATGACGAAGAACTCCGATTGCGAAGGCAGCTTACTG…	Bacteroidetes	Bacteroidia	Bacteroidales	Bacteroidales_UCG-001	NA
ACTCCTACGGGAGGCAGCAGTGAGGAATATTGGTCAATGGGGGCAACCCTGAACCAGCCATGCCGCGTGCAGGAAGACGGCTCTATGAGTTGTAAACTGCTTTTGTAGATGGATAAATCACGGTACGCGTACCGTGTTGCAGGTAGTCTACGAATAAGGATCGGCTAACTCCGTGCCAGCAGCCGCGGTAATACGGAGGATCCGAGCGTTATCCGGATTTATTGGGTTTAAAGGGTGCGTAGGCGGCACGGTAAGTTAGAGGTGAAATGCGGTGGCTCAACCACCGAACTGCCTCTGATACTGCCGGGCTAGAGATTAGATGCGGTAGGCGGAATGTGTGGTGTAGCGGTGAAATGCTTAGAGATCACACAGAACACCGATTGCGAAGGCAGCTTACCA…	Bacteroidetes	Bacteroidia	Bacteroidales	Rikenellaceae	Alistipes_II
ACTCCTACGGGAGGCAGCAGTGGGGAATATTGCACAATGGACGGAAGTCTGATGCAGCAACGCCGCGTGGAGGATGACACATTTCGGTGCGTAAACTCCTTTTATGTAAGAAGATAATGACGGTATTATATGAATAAGCACCGGCTAACTCCGTGCCAGCAGCCGCGGTAATACGGGGGGTGCAAGCGTTACTCGGAATCACTGGGCGTAAAGAGCGTGTAGGCGGATTGATAAGTTTGAAGTGAAATCCTATAGCTTAACTATAGAATTGCTTTGAAAACTGTTAGTCTAGAATGTGGGAGAGGTAGATGGAATTTCTGGTGTAGGGGTAAAATCCGTAGAGATCAGAAGGAATACCGATTGCGAAGGCGATCTACTGGAACAATATTGACGCTGAGA…	Proteobacteria	Epsilonproteobacteria	Campylobacterales	Campylobacteraceae	Arcobacter
ACTCCTACGGGAGGCAGCAGTGAGGAATATTGGTCAATGGACGCAAGTCTGAACCAGCCATGCCGCGTGCAGGAAGACGGCTCTATGAGTTGTAAACTGCTTTTGTACGAGGGTAAACCCTGATACGTGTATCAGGCTGAAAGTATCGTACGAATAAGGATCGGCTAACTCCGTGCCAGCAGCCGCGGTAATACGGAGGATCCAAGCGTTATCCGGATTTATTGGGTTTAAAGGGTGCGTAGGCGGTTTGTTAAGTTAGAGGTGAAATTCCGTGGCTCAACCACGGCACTGCCTCTGATACTGGCAGGCTAGAGAATGGTTGCTGTGGGCGGAATGTGTGGTGTAGCGGTGAAATGCTTAGAGATCACACAGAACACCGATTGCGAAGGCAGCTCACAA…	Bacteroidetes	Bacteroidia	Bacteroidales	Rikenellaceae	Alisitpes_IV
ACTCCTACGGGAGGCAGCAGTGAGGAATATTGGTCAATGGACGCAAGTCTGAACCAGCCATGCCGCGTGCAGGAAGACGGCTCTATGAGTTGTAAACTGCTTTTGTACGAGGGTAAACCCTGATACGTGTATCAGGCTGAAAGTATCGTACGAATAAGGATCGGCTAACTCCGTGCCAGCAGCCGCGGTAATACGGAGGATCCAAGCGTTATCCGGATTTATTGGGTTTAAAGGGTGCGTAGGCGGTTTGTTAAGTTAGAGGTGAAATCCCGTGGCTCAACCACGGAACTGCCTCTGATACTGGCAGGCTAGAGAATGGTTGCTGTGGGCGGAATGTGTGGTGTAGCGGTGAAATGCTTAGAGATCACACAGAACACCGATTGCGAAGGCAGCTCACAA…	Bacteroidetes	Bacteroidia	Bacteroidales	Rikenellaceae	Alisitpes_IV
ACTCCTACGGGAGGCAGCAGTGAGGAATATTGGTCAATGGACGCAAGTCTGAACCAGCCATGCCGCGTGCAGGAAGACGGCTCTATGAGTTGTAAACTGCTTTTGTACGAGGGTAAACCCTGATACGTGTATCAGGCTGAAAGTATCGTACGAATAAGGATCGGCTAACTCCGTGCCAGCAGCCGCGGTAATACGGAGGATCCAAGCGTTATCCGGATTTATTGGGTTTAAAGGGTGCGTAGGCGGTTTGTTAAGTTAGAGGTGAAATCCCGTGGCTCAACCACGGAACTGCCTCTGATACTGGCAGGCTAGAGAATGGTTGCTGTGGGCGGAATGTGTGGTGTAGCGGTGAAATGCTTAGAGATCACACAGAACACCGATTGCGAAGGCAGCTCACAA…	Bacteroidetes	Bacteroidia	Bacteroidales	Rikenellaceae	Alisitpes_IV
ACTCCTACGGGAGGCAGCAGTAAGGAATATTGGGCAATGGACGCAAGTCTGACCCAGCCATGCCGCGTGAAGGAAGACAGCCCTATGGGTTGTAAACTTCTTTTAACAGAGGATAAAGTCGCGTATGTATACGCGTTTGCAGGTATCTGTTGAATAAGCATCGGCTAACTCCGTGCCAGCAGCCGCGGTAATACGGAGGATGCAAGCGTTATCCGGATTCATTGGGTTTAAAGGGTGCGCAGGCGGACTTTTAAGTCAGCGGTGAAATTCCACGGCTCAACCGTGGCGCTGCCGTTGATACTGGGAGTCTTGAGTGTGATTGAGGTGGGCGGAATGTAGCGTGTAGCGGTGAAATGCATAGATATGCTACAGAACACCAATTGCGAAGGCAGCTCACCA…	Bacteroidetes	Sphingobacteria	Sphingobacteriales_1	SB_1	Termite_cluster
ACTCCTACGGGAGGCAGCAGTGGGGGATATTGCACAATGGGCGAAAGCCTGATGCAGCGACGCCGCGTGAGGGAAGAAGGTTTTCGGATTGTAAACCTCTGTCTTCGGGGACGATAATGACGGTACCCGAGGAGGAAGCCACGGCTAACTACGTGCCAGCAGCCGCGGTAAAACGTAGGTGGCAAGCGTTGTCCGGAATTACTGGGTGTAAAGGGAGCGCAGGCGGGGTGCCAAGTTGGGCGTGAAAACTATGGGCTCAACCCATAGATTGCGCTCAAAACTGGCGCTCTTGAGTGATGGAGAGGCAGGCGGAATTCCCGGTGTAGCGGTGGAATGCGTAGATATCGGGAGGAACACCAGTGGCGAAGGCGGCCTGCTGGACATTAACTGACGCTGAGG…	Firmicutes	Clostridia_1	Clostridiales	Ruminococcaceae	Termite_cockroach_cluster
ACTCCTACGGGAGGCAGCAGTGAGGGATATTGGGCAATGGGGGAAACCCTGACCCAGCAACGCCGCGTGAGGGAAGACGGTTTTCGGATTGTAAACCTCTGTCCTCTGTGAAGATAATGACGGTAGCAGAGGAGGAAGCTCCGGCTAACTACGTGCCAGCAGCCGCGGTAATACGTAGGGAGCAAGCGTTGTCCGGATTTACTGGGTGTAAAGGGTGCGTAGGCGGCTATGCAAGTCAGGAGTGAAATCTATGGGCTTAACCCATAAACTGCTTTTGAAACTGCATGGCTTGAGTGAAGTAGAGGTAGGCGGAATTCCCGGTGTAGCGGTGGAATGCGTAGAGATCGGGAGGAACACCAGTGGCGAAGGCGGCCTACTGGGCTTTAACTGACGCTGAAG…	Firmicutes	Clostridia_1	Clostridiales	Ruminococcaceae	Gut_cluster_1
ACTCCTACGGGAGGCAGCAGTAGGGAATCTTCCGCAATGGACGAAAGTCTGACGGAGCAACGCCGCGTGAGTGATGAAGGCTTTCGGGTCGTAAAACTCTGTTGTTAGGGAAGAACAAGTGCTAGTTGAATAAGCTGGCACCTTGACGGTACCTAACCAGAAAGCCACGGCTAACTACGTGCCAGCAGCCGCGGTAATACGTAGGTGGCAAGCGTTATCCGGAATTATTGGGCGTAAAGCGCGCGCAGGTGGTTTCTTAAGTCTGATGTGAAAGCCCACGGCTCAACCGTGGAGGGTCATTGGAAACTGGGAGACTTGAGTGCAGAAGAGGAAAGTGGAATTCCATGTGTAGCGGTGAAATGCGTAGAGATATGGAGGAACACCAGTGGCGAAGGCGAC…	Firmicutes	Bacilli	Bacillales	Bacillaceae	Bacillus
ACTCCTACGGGAGGCAGCAGTGAGGAATATTGGTCAATGGACGCAAGTCTGAACCAGCCATGCCGCGTGCAGGAAGACGGCTCTATGAGTTGTAAACTGCTTTTGTACGAGGGTAAACCCGACTACGTGTAGTCGGCTGAAAGTATCGTACGAATAAGGATCGGCTAACTCCGTGCCAGCAGCCGCGGTAATACGGAGGATCCAAGCGTTATCCGGATTTATTGGGTTTAAAGGGTGCGTAGGCGGTTCGGTAAGTTAGAGGTGAAATTCCGTGGCTCAACCACGGCACTGCCTCTGATACTGCCGGGCTAGAGAATGGTTGCTGTGGGCGGAATGTGTGGTGTAGCGGTGAAATGCTTAGAGATCACACAGAACACCGATTGCGAAGGCAGCTCACAA…	Bacteroidetes	Bacteroidia	Bacteroidales	Rikenellaceae	Alisitpes_IV
ACTCCTACGGGAGGCAGCAGTGAGGAATATTGGTCAATGGACGCAAGTCTGAACCAGCCATGCCGCGTGCAGGAAGACGGCTCTATGAGTTGTAAACTGCTTTTGTACGAGGGTAAACCCTGATACGTGTATCAGGCTGAAAGTATCGTACGAATAAGGATCGGCTAACTCCGTGCCAGCAGCCGCGGTAATACGGAGGATCCAAGCGTTATCCGGATTTATTGGGTTTAAAGGGTGCGTAGGCGGTTTGTTAAGTTAGAGGTGAAATTCCGTGGCTCAACCACGGCACTGCCTCTGATACTGGCAGGCTAGAGAATGGTTGCTGTGGGCGGAATGTGTGGTGTAGCGGTGAAATGCTTAGAGATCACACAGAACACCGATTGCGAAGGCAGCTCACAA…	Bacteroidetes	Bacteroidia	Bacteroidales	Rikenellaceae	Alisitpes_IV
ACTCCTACGGGAGGCAGCAGTGAGGAATATTGGTCAATGGACGCAAGTCTGAACCAGCCATGCCGCGTGCAGGAAGACGGCTCTATGAGTTGTAAACTGCTTTTGTACGAGGGTAAACCCGACTACGTGTAGTCGGCTGAAAGTATCGTACGAATAAGGATCGGCTAACTCCGTGCCAGCAGCCGCGGTAATACGGAGGATCCAAGCGTTATCCGGATTTATTGGGTTTAAAGGGTGCGTAGGCGGTTCGGTAAGTTAGAGGTGAAATTCCGTGGCTCAACCACGGCACTGCCTCTGATACTGCCGGGCTAGAGAATGGTTGCTGTGGGCGGAATGTGTGGTGTAGCGGTGAAATGCTTAGAGATCACACAGAACACCGATTGCGAAGGCAGCTCACAA…	Bacteroidetes	Bacteroidia	Bacteroidales	Rikenellaceae	Alisitpes_IV
ACTCCTACGGGAGGCAGCAGTGAGGAATATTGGTCAATGGCCGTAAGGCTGAACCAGCCAAGTAGCGTGAAGGATGACGGCCCTATGGGTTGTAAACTTCTTTTATATGGGAATAACGTTACCCACGTGTGGGTATGTGCATGTACCATGTGAATAAGGATCGGCTAACTCCGTGCCAGCAGCCGCGGTAATACGGAGGATCCGAGCGTTATCCGGATTTATTGGGTTTAAAGGGAGCGTAGGCGGGATCTCAAGTCAGCTGTGAAATGTAGATGCTCAACATCTGCACTGCAGTTGAAACTGGTATTCTTGAGTGCGTAAGAGGTAGGCGGAATTCGTCGTGTAGCGGTGAAATGCATAGATATGACGAAGAACTCCGATTGCGAAGGCAGCTTACTG…	Bacteroidetes	Bacteroidia	Bacteroidales	Bacteroidales_UCG-001	NA
ACTCCTACGGGAGGCAGCAGTGGGGAATATTGCACAATGGACGGAAGTCTGATGCAGCAACGCCGCGTGGAGGATGACACATTTCGGTGCGTAAACTCCTTTTATGTAAGAAGATAATGACGGTATTATATGAATAAGCACCGGCTAACTCCGTGCCAGCAGCCGCGGTAATACGGGGGGTGCAAGCGTTACTCGGAATCACTGGGCGTAAAGAGCGTGTAGGCGGATTGATAAGTTTGAAGTGAAATCCTATAGCTTAACTATAGAATTGCTTTGAAAACTGTTAGTCTAGAATGTGGGAGAGGTAGATGGAATTTCTGGTGTAGGGGTAAAATCCGTAGAGATCAGAAGGAATACCGATTGCGAAGGCGATCTACTGGAACAATATTGACGCTGAGA…	Proteobacteria	Epsilonproteobacteria	Campylobacterales	Campylobacteraceae	Arcobacter
ACTCCTACGGGAGGCAGCAGTGGGGGATATTGCACAATGGGCGAAAGCCTGATGCAGCGACGCCGCGTGAGGGAAGAAGGTTTTCGGATTGTAAACCTCTGTCTTCGGGGACGATAATGACGGTACCCGAGGAGGAAGCCACGGCTAACTACGTGCCAGCAGCCGCGGTAAAACGTAGGTGGCAAGCGTTGTCCGGAATTACTGGGTGTAAAGGGAGCGCAGGCGGGGTGCCAAGTTGGGCGTGAAAACTATGGGCTCAACCCATAGATTGCGCTCAAAACTGGCGCTCTTGAGTGATGGAGAGGCAGGCGGAATTCCCGGTGTAGCGGTGGAATGCGTAGATATCGGGAGGAACACCAGTGGCGAAGGCGGCCTGCTGGACATTAACTGACGCTGAGG…	Firmicutes	Clostridia_1	Clostridiales	Ruminococcaceae	Termite_cockroach_cluster
ACTCCTACGGGAGGCAGCAGTAGGGAATCTTCCGCAATGGACGAAAGTCTGACGGAGCAACGCCGCGTGAGTGATGAAGGCTTTCGGGTCGTAAAACTCTGTTGTTAGGGAAGAACAAGTGCTAGTTGAATAAGCTGGCACCTTGACGGTACCTAACCAGAAAGCCACGGCTAACTACGTGCCAGCAGCCGCGGTAATACGTAGGTGGCAAGCGTTATCCGGAATTATTGGGCGTAAAGCGCGCGCAGGTGGTTTCTTAAGTCTGATGTGAAAGCCCACGGCTCAACCGTGGAGGGTCATTGGAAACTGGGAGACTTGAGTGCAGAAGAGGAAAGTGGAATTCCATGTGTAGCGGTGAAATGCGTAGAGATATGGAGGAACACCAGTGGCGAAGGCGAC…	Firmicutes	Bacilli	Bacillales	Bacillaceae	Bacillus
ACTCCTACGGGAGGCAGCAGTGAGGAATATTGGTCAATGGGGGCAACCCTGAACCAGCCATGCCGCGTGCAGGAAGACGGCTCTATGAGTTGTAAACTGCTTTTGTACAGGGATAAATACATATACGTGTATATGTTTGAAGGTACTGTACGAATAAGGATCGGCTAACTCCGTGCCAGCAGCCGCGGTAATACGGAGGATCCGAGCGTTATCCGGATTTATTGGGTTTAAAGGGTGCGTAGGCGGCGAGGTAAGTTAGAGGTGAAATCCCGTGGCTCAACCACGGAACCGCCTCTGATACTGCTTTGCTAGAGAGTAGATGCGGTAGGCGGAATGTGTAGTGTAGCGGTGAAATGCTTAGAGATTACACAGAACACCGATTGCGAAGGCAGCTTACCA…	Bacteroidetes	Bacteroidia	Bacteroidales	Rikenellaceae	Alistipes_II
ACTCCTACGGGAGGCAGCAGTGAGGAATATTGGTCAATGGACGCAAGTCTGAACCAGCCATGCCGCGTGCAGGAAGACGGCTCTATGAGTTGTAAACTGCTTTTGTACGAGGGTAAACCCTGATACGTGTATCAGGCTGAAAGTATCGTACGAATAAGGATCGGCTAACTCCGTGCCAGCAGCCGCGGTAATACGGAGGATCCAAGCGTTATCCGGATTTATTGGGTTTAAAGGGTGCGTAGGCGGTTTGTTAAGTTAGAGGTGAAATTCCGTGGCTCAACCACGGCACTGCCTCTGATACTGGCAGGCTAGAGAATGGTTGCTGTGGGCGGAATGTGTGGTGTAGCGGTGAAATGCTTAGAGATCACACAGAACACCGATTGCGAAGGCAGCTCACAA…	Bacteroidetes	Bacteroidia	Bacteroidales	Rikenellaceae	Alisitpes_IV
ACTCCTACGGGAGGCAGCAGTGGGGAATATTGGGCAATGGGCGAAAGCCTGACCCAGCAACGCCGCGTGAAGGAAGAAGGTTTTCGGATCGTAAACTTCTATCCCGGGTGAAGATAATGACGGTAGCCCGGAAGGAAGCCCCGGCTAACTACGTGCCAGCAGCCGCGGTAATACGTAGGGGGCAAGCGTTGTCCGGAATGATTGGGCGTAAAGGGCGCGTAGGCGGCTCTGTAAGTCTGGAGTGAAAGTCCTGCTTTTAAGGTGGGAATTGCTTTGGAAACTGTGGAGCTTGAGTGCAGGAGAGGTTAGCGGAATTCCCGGTGTAGCGGTGAAATGCGTAGAGATCGGGAGGAACACCAGTGGCGAAGGCGGCTAACTGGACTGTAACTGACGCTGAGG…	Firmicutes	Clostridia_1	Clostridiales	Lachnospiraceae	Gut_cluster_13
ACTCCTACGGGAGGCAGCAGTGAGGAATATTGGTCAATGGCCGTAAGGCTGAACCAGCCAAGTAGCGTGAAGGATGACGGCCCTATGGGTTGTAAACTTCTTTTATATGGGAATAACGTTACCCACGTGTGGGTATGTGCATGTACCATGTGAATAAGGATCGGCTAACTCCGTGCCAGCAGCCGCGGTAATACGGAGGATCCGAGCGTTATCCGGATTTATTGGGTTTAAAGGGAGCGTAGGCGGGATCTCAAGTCAGCTGTGAAATGTAGATGCTCAACATCTGCACTGCAGTTGAAACTGGTATTCTTGAGTGCGTAAGAGGTAGGCGGAATTCGTCGTGTAGCGGTGAAATGCATAGATATGACGAAGAACTCCGATTGCGAAGGCAGCTTACTG…	Bacteroidetes	Bacteroidia	Bacteroidales	Bacteroidales_UCG-001	NA
ACTCCTACGGGAGGCAGCAGTGAGGAATATTGGTCAATGGACGCAAGTCTGAACCAGCCATGCCGCGTGCAGGAAGACGGCTCTATGAGTTGTAAACTGCTTTTGTACGAGGGTAAACCCTGATACGTGTATCAGGCTGAAAGTATCGTACGAATAAGGATCGGCTAACTCCGTGCCAGCAGCCGCGGTAATACGGAGGATCCAAGCGTTATCCGGATTTATTGGGTTTAAAGGGTGCGTAGGCGGTTTGTTAAGTTAGAGGTGAAATTCCGTGGCTCAACCACGGCACTGCCTCTGATACTGGCAGGCTAGAGAATGGTTGCTGTGGGCGGAATGTGTGGTGTAGCGGTGAAATGCTTAGAGATCACACAGAACACCGATTGCGAAGGCAGCTCACAA…	Bacteroidetes	Bacteroidia	Bacteroidales	Rikenellaceae	Alisitpes_IV
ACTCCTACGGGAGGCAGCAGTGAGGAATATTGGTCAATGGGGGCAACCCTGAACCAGCCATGCCGCGTGCAGGAAGACGGCTCTATGAGTTGTAAACTGCTTTTATACGGGGATAAATCAGAGCACGCGTGCTCTGTTGAAGGTACCGTAAGAATAAGGATCGGCTAACTCCGTGCCAGCAGCCGCGGTAATACGGAGGATCCAAGCGTTATCCGGATTTATTGGGTTTAAAGGGTGCGTAGGCGGCACGGTAAGTTAGCGGTGAAATCTCGGGGCTTAACCCCGAAATTGCCGTTAAAACTGCCGGGCTAGAGATTAGATGCGGTAGGCGGAATGTGTGGTGTAGCGGTGAAATGCTTAGAGATCACACAGAACCCCGATTGCGAAGGCAGCTTACCA…	Bacteroidetes	Bacteroidia	Bacteroidales	Rikenellaceae	Alistipes_II
ACTCCTACGGGAGGCAGCAGTGGGGAATTTTGCGCAATGGGCGAAAGCCTGACGCAGCAACGCCGCGTGCGGGATGAAGGCCTTCGGGTTGTAAACCGCTTTCAGTAGGGAAGATTATGACGGTACCTACAGAAGAAGCTCCGGCTAACTACGTGCCAGCAGCCGCGGTAATACGTAGGGAGCAAGCGTTATCCGGATTCATTGGGCGTAAAGAGCGCGTAGGCGGCTTGTTAAGCAAGGTGTTAAATCTGAGGGCTCAACCCCCAGCCGCACCTTGAACTGGCAGGCTTGAGTTTGGTAGAGGAAGGTGGAATTCCCAGTGTAGCGGTGGAATGCGCAGATATTGGGAAGAACACCGGTGGCGAAGGCGGCCTTCTGGGCCATAACTGACGCTGAGGC…	Actinobacteria	Actinobacteria	Coriobacteriales	Coriobacteriaceae	Uncultured_10
ACTCCTACGGGAGGCAGCAGTGGGGAATATTGCGCAATGGACGAAAGTCTGACGCAGCGACGCCGCGTGAGGGATGAAGGCCTTCGGGTCGTAAACCTCTGTCAGGAGGGAAGAACAAGCCACGTGCTAATCAGCGTGGCCCTGACGGTACCTCCAAAGGAAGCACCGGCTAACTCCGTGCCAGCAGCCGCGGTAATACGGAGGGTGCAAGCGTTAATCGGAATCACTGGGCGTAAAGCGCGCGTAGGCGGCTTTGTAAGTCAGAGGTGAAATCCCACGGCTCACCCGTGGAACTGCCTTTGATACTGCATTGCTTGAGTGTGTGAGAGGATGGCGGAATTCCAGGTGTAGGAGTGAAATCCGTAGAGATCTGGAGGAACATCAGTGGCGAAGGCGGCC…	Proteobacteria	Deltaproteobacteria	Desulfovibrionales	Desulfovibrionaceae	Gut_cluster_3
ACTCCTACGGGAGGCAGCAGTGAGGAATATTGGTCAATGGACGCAAGTCTGAACCAGCCATGCCGCGTGCAGGAAGACGGCTCTATGAGTTGTAAACTGCTTTTGTACGAGGGTAAACCCGACTACGTGTAGTCGGCTGAAAGTATCGTACGAATAAGGATCGGCTAACTCCGTGCCAGCAGCCGCGGTAATACGGAGGATCCAAGCGTTATCCGGATTTATTGGGTTTAAAGGGTGCGTAGGCGGTTCGGTAAGTTAGAGGTGAAATTCCGTGGCTCAACCACGGCACTGCCTCTGATACTGCCGGGCTAGAGAATGGTTGCTGTGGGCGGAATGTGTGGTGTAGCGGTGAAATGCTTAGAGATCACACAGAACACCGATTGCGAAGGCAGCTCACAA…	Bacteroidetes	Bacteroidia	Bacteroidales	Rikenellaceae	Alisitpes_IV
ACTCCTACGGGAGGCAGCAGTGAGGAATATTGGTCAATGGGGGCAACCCTGAACCAGCCATGCCGCGTGCAGGAAGACGGCTCTATGAGTTGTAAACTGCTTTTATACGGGGATAAATCAGAGCACGCGTGCTCTGTTGAAGGTACCGTAAGAATAAGGATCGGCTAACTCCGTGCCAGCAGCCGCGGTAATACGGAGGATCCAAGCGTTATCCGGATTTATTGGGTTTAAAGGGTGCGTAGGCGGCACGGTAAGTTAGCGGTGAAATCTCGGGGCTTAACCCCGAAATTGCCGTTAAAACTGCCGGGCTAGAGATTAGATGCGGTAGGCGGAATGTGTGGTGTAGCGGTGAAATGCTTAGAGATCACACAGAACCCCGATTGCGAAGGCAGCTTACCA…	Bacteroidetes	Bacteroidia	Bacteroidales	Rikenellaceae	Alistipes_II
ACTCCTACGGGAGGCAGCAGTGGGGGATATTGCACAATGGGCGAAAGCCTGATGCAGCGACGCCGCGTGAGGGAAGAAGGTTTTCGGATTGTAAACCTCTGTCTTCGGGGACGATAATGACGGTACCCGAGGAGGAAGCCACGGCTAACTACGTGCCAGCAGCCGCGGTAAAACGTAGGTGGCAAGCGTTGTCCGGAATTACTGGGTGTAAAGGGAGCGCAGGCGGGGTGCCAAGTTGGGCGTGAAAACTATGGGCTCAACCCATAGATTGCGCTCAAAACTGGCGCTCTTGAGTGATGGAGAGGCAGGCGGAATTCCCGGTGTAGCGGTGGAATGCGTAGATATCGGGAGGAACACCAGTGGCGAAGGCGGCCTGCTGGACATTAACTGACGCTGAGG…	Firmicutes	Clostridia_1	Clostridiales	Ruminococcaceae	Termite_cockroach_cluster
ACTCCTACGGGAGGCAGCAGTGGGGAATATTGGGCAATGGGCGAAAGCCTGACCCAGCAACGCCGCGTGAAGGAAGAAGGTTTTCGGATCGTAAACTTCTATCCCGGGTGAAGATAATGACGGTAGCCCGGAAGGAAGCCCCGGCTAACTACGTGCCAGCAGCCGCGGTAATACGTAGGGGGCAAGCGTTGTCCGGAATGATTGGGCGTAAAGGGCGCGTAGGCGGCTCTGTAAGTCTGGAGTGAAAGTCCTGCTTTTAAGGTGGGAATTGCTTTGGAAACTGTGGAGCTTGAGTGCAGGAGAGGTTAGCGGAATTCCCGGTGTAGCGGTGAAATGCGTAGAGATCGGGAGGAACACCAGTGGCGAAGGCGGCTAACTGGACTGTAACTGACGCTGAGG…	Firmicutes	Clostridia_1	Clostridiales	Lachnospiraceae	Gut_cluster_13
ACTCCTACGGGAGGCAGCAGTGGGGAATATTGCACAATGGGGGAAACCCTGATGCAGCGACGCCGCGTGAAGGAAGAAGTATTTCGGTATGTAAACTTCTATCAGCAGGGAAGAAAATGACGGTACCTGACTAAGAAGCCCCGGCTAATTACGTGCCAGCAGCCGCGGTAATACGTAAGGGGCAAGCGTTATCCGGATTTACTGGGTGTAAAGGGAGCGTAGACGGCTGTGTAAGTCAGATGTGAAAGCCCGGGGCTCAACCCCGGGACTGCATTTGAAACTATGCAGCTAGAGTGTCGGAGAGGTAAGCGGAATTCCTAGTGTAGCGGTGAAATGCGTAGATATTAGGAGGAACACCAGTGGCGAAGGCGGCTTACTGGACGATGACTGACGTTGAGG…	Firmicutes	Clostridia_1	Clostridiales	Lachnospiraceae	Robinsoniella_Insects
ACTCCTACGGGAGGCAGCAGTGGGGGATATTGCACAATGGGCGAAAGCCTGATGCAGCGACGCCGCGTGAGGGAAGAAGGTTTTCGGATTGTAAACCTCTGTCTTCGAGGACGAAGAAGTGACGGTACTCGAGGAGGAAGCCACGGCTAACTACGTGCCAGCAGCCGCGGTAAAACGTAGGTGGCAAGCGTTGTCCGGAATTACTGGGTGTAAAGGGAGCGCAGGCGGGGCGATAAGTTGAATGTGAAATGTATGGGCTCAACCCATAGACTGCGTTCAAAACTATCGTTCTTGAGTGATGTAGAGGCAGGCGGAATTCCCGGTGTAGCGGTGGAATGCGTAGATATCGGGAGGAACACCAGTGGCGAAGGCGGCCTGCTGGGCATAAACTGACGCTGA…	Firmicutes	Clostridia_1	Clostridiales	Ruminococcaceae	Termite_cockroach_cluster
ACTCCTACGGGAGGCAGCAGTGGGGAATATTGCACAATGGGCGAAAGCCTGATGCAGCAACGCCGCGTGAGTGATGAAGGTCTTCGGATTGTAAAGCTCTTTGATTAGGGACGATAATGACGGTACCTAAAGAACAAGCCACGGCTAACTACGTGCCAGCAGCCGCGGTAATACGTAGGTGGCAAGCGTTGTCCGGATTTATTGGGCGTAAAGGGAGCGTAGGCGGACCTTTAAGTCAGATGTGAAATACCCAGGGCTCAACCCGGGTGCTGCATTTGATACTGGAGGTCTAGAGTACAGGAGAGGAGAGTGGAATTCCTAGTGTAGCGGTGAAATGCGTAGAGATTAGGAAGAACACCAGTGGCGAAGGCGACTCTCTGGACTGTAACTGACGCTGAG…	Firmicutes	Clostridia_1	Clostridiales	Clostridiaceae_1	Arthropod_cluster
ACTCCTACGGGAGGCAGCAGTGGGGAATATTGCACAATGGACGGAAGTCTGATGCAGCAACGCCGCGTGGAGGATGACACATTTCGGTGCGTAAACTCCTTTTATGTAAGAAGATAATGACGGTATTATATGAATAAGCACCGGCTAACTCCGTGCCAGCAGCCGCGGTAATACGGGGGGTGCAAGCGTTACTCGGAATCACTGGGCGTAAAGAGCGTGTAGGCGGATTGATAAGTTTGAAGTGAAATCCTATAGCTTAACTATAGAATTGCTTTGAAAACTGTTAGTCTAGAATGTGGGAGAGGTAGATGGAATTTCTGGTGTAGGGGTAAAATCCGTAGAGATCAGAAGGAATACCGATTGCGAAGGCGATCTACTGGAACAATATTGACGCTGAGA…	Proteobacteria	Epsilonproteobacteria	Campylobacterales	Campylobacteraceae	Arcobacter
ACTCCTACGGGAGGCAGCAGTGAGGAATATTGGTCAATGGGGGCAACCCTGAACCAGCCATGCCGCGTGCAGGAAGACGGCTCTATGAGTTGTAAACTGCTTTTATACAGGGATAACTATGTGTACGTGTACACATTTGAAGGTACTGTATGAATAAGGATCGGCTAACTCCGTGCCAGCAGCCGCGGTAATACGGAGGATCCAAGCGTTATCCGGATTTATTGGGTTTAAAGGGTGCGTAGGCGGCACGGTAAGTTAGCGGTGAAATCTCGGGGCTTAACCCCGAAACTGCCGTTAAAACTGCCGAGCTAGAGATTAGATGCGGTAGGCGGAATGTGTGGTGTAGCGGTGAAATGCTTAGAGATCACACAGAACACCGATTGCGAAGGCAGCTTACCA…	Bacteroidetes	Bacteroidia	Bacteroidales	Rikenellaceae	Alistipes_II
ACTCCTACGGGAGGCAGCAGTGGGGAATATTGCACAATGGGCGCAAGCCTGATGCAGCCATGCCGCGTGTATGAAGAAGGCCTTCGGGTTGTAAAGTACTTTCAGCGGGGAGGAAGGGAGTGTGTTTAATACGCACATTCATTGACGTTACCCGCAGAAGAAGCACCGGCTAACTCCGTGCCAGCAGCCGCGGTAATACGGAGGGTGCAAGCGTTAATCGGAATTACTGGGCGTAAAGCGCACGCAGGCGGTCTGTTAAGTCAGATGTGAAATCCCCGGGCTCAACCCGGGAACTGCATTTGAAACTGGCAGGCTTGAGTCTCGTAGAGGGGGGTGGAATTCCAGGTGTAGCGGTGAAATGCGTAGAGATCTGGAGGAATACCGGTGGCGAAGGCGGCC…	Proteobacteria	Gammaproteobacteria_1	Enterobacteriales	Enterobacteriaceae	Escherichia_blattae_cluster
ACTCCTACGGGAGGCAGCAGTAGGGAATCTTCCGCAATGGACGAAAGTCTGACGGAGCAACGCCGCGTGAGTGATGAAGGCTTTCGGGTCGTAAAACTCTGTTGTTAGGGAAGAACAAGTGCTAGTTGAATAAGCTGGCACCTTGACGGTACCTAACCAGAAAGCCACGGCTAACTACGTGCCAGCAGCCGCGGTAATACGTAGGTGGCAAGCGTTATCCGGAATTATTGGGCGTAAAGCGCGCGCAGGTGGTTTCTTAAGTCTGATGTGAAAGCCCACGGCTCAACCGTGGAGGGTCATTGGAAACTGGGAGACTTGAGTGCAGAAGAGGAAAGTGGAATTCCATGTGTAGCGGTGAAATGCGTAGAGATATGGAGGAACACCAGTGGCGAAGGCGAC…	Firmicutes	Bacilli	Bacillales	Bacillaceae	Bacillus
ACTCCTACGGGAGGCAGCAGTAGGGAATCTTCCGCAATGGACGAAAGTCTGACGGAGCAACGCCGCGTGAGTGATGAAGGCTTTCGGGTCGTAAAACTCTGTTGTTAGGGAAGAACAAGTGCTAGTTGAATAAGCTGGCACCTTGACGGTACCTAACCAGAAAGCCACGGCTAACTACGTGCCAGCAGCCGCGGTAATACGTAGGTGGCAAGCGTTATCCGGAATTATTGGGCGTAAAGCGCGCGCAGGTGGTTTCTTAAGTCTGATGTGAAAGCCCACGGCTCAACCGTGGAGGGTCATTGGAAACTGGGAGACTTGAGTGCAGAAGAGGAAAGTGGAATTCCATGTGTAGCGGTGAAATGCGTAGAGATATGGAGGAACACCAGTGGCGAAGGCGAC…	Firmicutes	Bacilli	Bacillales	Bacillaceae	Bacillus
ACTCCTACGGGAGGCAGCAGTGGGGAATATTGCACAATGGGCGCAAGCCTGATGCAGCCATGCCGCGTGTATGAAGAAGGCCTTCGGGTTGTAAAGTACTTTCAGCGAGGAGGAAGGCATTGTGGTTAATAACCGCAGTGATTGACGTTACTCGCAGAAGAAGCACCGGCTAACTCCGTGCCAGCAGCCGCGGTAATACGGAGGGTGCAAGCGTTAATCGGAATTACTGGGCGTAAAGCGCACGCAGGCGGTCTGTCAAGTCGGATGTGAAATCCCCGGGCTCAACCTGGGAACTGCATTCGAAACTGGCAGGCTAGAGTCTTGTAGAGGGGGGTAGAATTCCAGGTGTAGCGGTGAAATGCGTAGAGATCTGGAGGAATACCGGTGGCGAAGGCGGCC…	Proteobacteria	Gammaproteobacteria_1	Enterobacteriales	Enterobacteriaceae	Escherichia_blattae_cluster
ACTCCTACGGGAGGCAGCAGTGGGGAATATTGGGCAATGGGCGAAAGCCTGACCCAGCAACGCCGCGTGAGGGAAGAAGGTTTTCGGATCGTAAACCTCTGTCGCAAGGGACGAGTAGAAGACGGTACCTTGCAAGGAAGCTCCGGCTAACTACGTGCCAGCAGCCGCGGTAATACGTAGGGAGCGAGCGTTGTCCGGAATGACTGGGCGTAAAGGGCGCGTAGGTGGCCCAATAAGTTAGGAGTGAAAGTCCCGCTTTCAAGGTGGGAATAGCTTTTAATACTGTAGGGCTTGAGTGTGGGAGAGGATAGCGGAATTCCCGGTGTAGCGGTGAAATGCGTAGAGATCGGGAGGAACACCAGTGGCGAAGGCGGCTATCTGGACCAAGACTGACACTGA…	Firmicutes	Clostridia_1	Clostridiales	Lachnospiraceae	Gut_cluster_13
ACTCCTACGGGAGGCAGCAGTGGGGAATATTGCACAATGGGGGAAACCCTGATGCAGCAACGCCGCGTGGAGGATGACGCATTTCGGTGTGTAAACTCCTTTTATTTGGGAAGATAATGACGGTACCAAATGAATAAGCACCGGCTAACTCCGTGCCAGCAGCCGCGGTAATACGGAGGGTGCAAGCGTTACTCGGAATCACTGGGCGTAAAGGGTGCGTAGGCGGGTTATCAAGTCTTAAGTGAAATCCAACAGCTTAACTGTTGAACTGCTTAGGAAACTGGCAACCTAGAGTAAGGGAGAGGTAGATGGAATTGGTGGTGTAGGGGTAAAATCCGTAGATATCACCAGGAATACTCATTGCGAAGGCGATCTACTGGAACTTAACTGACGCTGAGG…	Proteobacteria	Epsilonproteobacteria	Campylobacterales	Campylobacteraceae	Sulfurospirillum
ACTCCTACGGGAGGCAGCAGTGGGGGATATTGCACAATGGGCGAAAGCCTGATGCAGCGACGCCGCGTGAGGGAAGAAGGTTTTCGGATTGTAAACCTCTGTCTTCGAGGACGAAGAAGTGACGGTACTCGAGGAGGAAGCCACGGCTAACTACGTGCCAGCAGCCGCGGTAAAACGTAGGTGGCAAGCGTTGTCCGGAATTACTGGGTGTAAAGGGAGCGCAGGCGGGGCGATAAGTTGAATGTGAAATGTATGGGCTCAACCCATAGACTGCGTTCAAAACTATCGTTCTTGAGTGATGTAGAGGCAGGCGGAATTCCCGGTGTAGCGGTGGAATGCGTAGATATCGGGAGGAACACCAGTGGCGAAGGCGGCCTGCTGGGCATAAACTGACGCTGA…	Firmicutes	Clostridia_1	Clostridiales	Ruminococcaceae	Termite_cockroach_cluster
ACTCCTACGGGAGGCAGCAGTGGGGGATATTGCACAATGGGCGAAAGCCTGATGCAGCGACGCCGCGTGAGGGAAGAAGGTTTTCGGATTGTAAACCTCTGTCTTCGAGGACGAAGAAGTGACGGTACTCGAGGAGGAAGCCACGGCTAACTACGTGCCAGCAGCCGCGGTAAAACGTAGGTGGCAAGCGTTGTCCGGAATTACTGGGTGTAAAGGGAGCGCAGGCGGGGCGATAAGTTGAATGTGAAATGTATGGGCTCAACCCATAGACTGCGTTCAAAACTATCGTTCTTGAGTGATGTAGAGGCAGGCGGAATTCCCGGTGTAGCGGTGGAATGCGTAGATATCGGGAGGAACACCAGTGGCGAAGGCGGCCTGCTGGGCATAAACTGACGCTGA…	Firmicutes	Clostridia_1	Clostridiales	Ruminococcaceae	Termite_cockroach_cluster
ACTCCTACGGGAGGCAGCAGTGAGGAATATTGGTCAATGGGGGCAACCCTGAACCAGCCATGCCGCGTGCAGGAAGACGGCTCTATGAGTTGTAAACTGCTTTTACACAGGGATAAACCGGCGTACGTGTACGTCGTTGAAGGTACTGTGGGAATAAGGATCGGCTAACTCCGTGCCAGCAGCCGCGGTAATACGGAGGATCCCAGCGTTATCCGGATTTATTGGGTTTAAAGGGTGCGTAGGCGGCACGGTAAGTTAGCGGTGAAATCTCGGGGCTTAACCCCGAAATTGCCGTTAAAACTGCCGGGCTAGAGAGTAGATGCGGTAGGCGGAATGTGTAGTGTAGCGGTGAAATGCTTAGAGATTACACAGAACACCGATTGCGAAGGCAGCTTACCA…	Bacteroidetes	Bacteroidia	Bacteroidales	Rikenellaceae	Alistipes_II
ACTCCTACGGGAGGCAGCAGTGAGGAATATTGGTCAATGGGGGCAACCCTGAACCAGCCATGCCGCGTGCAGGAAGACGGCTCTATGAGTTGTAAACTGCTTTTGTAGATGGATAAATCACGGTACGCGTACCGTGTTGCAGGTAGTCTACGAATAAGGATCGGCTAACTCCGTGCCAGCAGCCGCGGTAATACGGAGGATCCGAGCGTTATCCGGATTTATTGGGTTTAAAGGGTGCGTAGGCGGCACGGTAAGTTAGAGGTGAAATGCGGTGGCTCAACCACCGAACTGCCTCTGATACTGCCGGGCTAGAGATTAGATGCGGTAGGCGGAATGTGTGGTGTAGCGGTGAAATGCTTAGAGATCACACAGAACACCGATTGCGAAGGCAGCTTACCA…	Bacteroidetes	Bacteroidia	Bacteroidales	Rikenellaceae	Alistipes_II
ACTCCTACGGGAGGCAGCAGTGAGGAATATTGGTCAATGGCCGTAAGGCTGAACCAGCCAAGTAGCGTGAAGGATGACGGCCCTATGGGTTGTAAACTTCTTTTATATGGGAATAACGTTACCCACGTGTGGGTATGTGCATGTACCATGTGAATAAGGATCGGCTAACTCCGTGCCAGCAGCCGCGGTAATACGGAGGATCCGAGCGTTATCCGGATTTATTGGGTTTAAAGGGAGCGTAGGCGGGATCTCAAGTCAGCTGTGAAATGTAGATGCTCAACATCTGCACTGCAGTTGAAACTGGTATTCTTGAGTGCGTAAGAGGTAGGCGGAATTCGTCGTGTAGCGGTGAAATGCATAGATATGACGAAGAACTCCGATTGCGAAGGCAGCTTACTG…	Bacteroidetes	Bacteroidia	Bacteroidales	Bacteroidales_UCG-001	NA
ACTCCTACGGGAGGCAGCAGTAAGGAATATTGGGCAATGGACGCAAGTCTGACCCAGCCATGCCGCGTGAAGGAAGACAGCCCTATGGGTTGTAAACTTCTTTTAACAGAGGATAAAGTCGCGTATGTATACGCGTTTGCAGGTATCTGTTGAATAAGCATCGGCTAACTCCGTGCCAGCAGCCGCGGTAATACGGAGGATGCAAGCGTTATCCGGATTCATTGGGTTTAAAGGGTGCGCAGGCGGACTTTTAAGTCAGCGGTGAAATTCCACGGCTCAACCGTGGCGCTGCCGTTGATACTGGGAGTCTTGAGTGTGATTGAGGTGGGCGGAATGTAGCGTGTAGCGGTGAAATGCATAGATATGCTACAGAACACCAATTGCGAAGGCAGCTCACCA…	Bacteroidetes	Sphingobacteria	Sphingobacteriales_1	SB_1	Termite_cluster
ACTCCTACGGGAGGCAGCAGTGGGGAATATTGCACAATGGGGGAAACCCTGATGCAGCGACGCCGCGTGAGTGAAGACGGCCTTCGGGTTGTAAAGCTCTGTTGCGGGGGACGATAATGACGGTACCCCGTGAGGAAGCCACGGCTAACTACGTGCCAGCAGCCGCGGTAATACGTAGGTGGCAAGCGTTGTCCGGAATTACTGGGTGTAAAGGGAGCGTAGGCGGGCAATTAAGTTGGATGTGAAATCTACAGGCTTAACCTGTAGCGTGCATCCAAAACTGAATGTCTTGAGTGATGTAGAGGCAGGCGGAATTCCTAGTGTAGCGGTGAAATGCGTAGATATTAGGAGGAACACCAGTGGCGAAGGCGGCCTGCTGGGCATTAACTGACGCTGAGG…	Firmicutes	Clostridia_1	Clostridiales	Ruminococcaceae	Insect_cluster
ACTCCTACGGGAGGCAGCAGTGAGGAATATTGGTCAATGGACGCAAGTCTGAACCAGCCATGCCGCGTGCAGGAAGACGGCTCTATGAGTTGTAAACTGCTTTTGTACGAGGGTAAACCCTGATACGTGTATCAGGCTGAAAGTATCGTACGAATAAGGATCGGCTAACTCCGTGCCAGCAGCCGCGGTAATACGGAGGATCCAAGCGTTATCCGGATTTATTGGGTTTAAAGGGTGCGTAGGCGGTTTGTTAAGTTAGAGGTGAAATCCCGTGGCTCAACCACGGAACTGCCTCTGATACTGGCAGGCTAGAGAATGGTTGCTGTGGGCGGAATGTGTGGTGTAGCGGTGAAATGCTTAGAGATCACACAGAACACCGATTGCGAAGGCAGCTCACAA…	Bacteroidetes	Bacteroidia	Bacteroidales	Rikenellaceae	Alisitpes_IV
ACTCCTACGGGAGGCAGCAGTGAGGAATATTGGTCAATGGGGGCAACCCTGAACCAGCCATGCCGCGTGCAGGAAGACGGCTCTATGAGTTGTAAACTGCTTTTATACGGGGATAAATCAGAGCACGCGTGCTCTGTTGAAGGTACCGTAAGAATAAGGATCGGCTAACTCCGTGCCAGCAGCCGCGGTAATACGGAGGATCCAAGCGTTATCCGGATTTATTGGGTTTAAAGGGTGCGTAGGCGGCACGGTAAGTTAGCGGTGAAATCTCGGGGCTTAACCCCGAAATTGCCGTTAAAACTGCCGGGCTAGAGATTAGATGCGGTAGGCGGAATGTGTGGTGTAGCGGTGAAATGCTTAGAGATCACACAGAACCCCGATTGCGAAGGCAGCTTACCA…	Bacteroidetes	Bacteroidia	Bacteroidales	Rikenellaceae	Alistipes_II
ACTCCTACGGGAGGCAGCAGTGAGGAATATTGGTCAATGGGGGCAACCCTGAACCAGCCATGCCGCGTGCAGGAAGACGGCTCTATGAGTTGTAAACTGCTTTTATACGGGGATAAATCAGAGCACGCGTGCTCTGTTGAAGGTACCGTAAGAATAAGGATCGGCTAACTCCGTGCCAGCAGCCGCGGTAATACGGAGGATCCAAGCGTTATCCGGATTTATTGGGTTTAAAGGGTGCGTAGGCGGCACGGTAAGTTAGCGGTGAAATCTCGGGGCTTAACCCCGAAATTGCCGTTAAAACTGCCGGGCTAGAGATTAGATGCGGTAGGCGGAATGTGTGGTGTAGCGGTGAAATGCTTAGAGATCACACAGAACCCCGATTGCGAAGGCAGCTTACCA…	Bacteroidetes	Bacteroidia	Bacteroidales	Rikenellaceae	Alistipes_II
ACTCCTACGGGAGGCAGCAGTGGGGAATATTGCACAATGGACGGAAGTCTGATGCAGCAACGCCGCGTGGAGGATGACACATTTCGGTGCGTAAACTCCTTTTATGTAAGAAGATAATGACGGTATTATATGAATAAGCACCGGCTAACTCCGTGCCAGCAGCCGCGGTAATACGGGGGGTGCAAGCGTTACTCGGAATCACTGGGCGTAAAGAGCGTGTAGGCGGATTGATAAGTTTGAAGTGAAATCCTATAGCTTAACTATAGAATTGCTTTGAAAACTGTTAGTCTAGAATGTGGGAGAGGTAGATGGAATTTCTGGTGTAGGGGTAAAATCCGTAGAGATCAGAAGGAATACCGATTGCGAAGGCGATCTACTGGAACAATATTGACGCTGAGA…	Proteobacteria	Epsilonproteobacteria	Campylobacterales	Campylobacteraceae	Arcobacter
ACTCCTACGGGAGGCAGCAGTGGGGAATATTGGGCAATGGGCGAAAGCCTGACCCAGCAACGCCGCGTGAAGGAAGAAGGTTTTCGGATCGTAAACTTCTATCCCGGGTGAAGATAATGACGGTAGCCCGGAAGGAAGCCCCGGCTAACTACGTGCCAGCAGCCGCGGTAATACGTAGGGGGCAAGCGTTGTCCGGAATGATTGGGCGTAAAGGGCGCGTAGGCGGCTCTGTAAGTCTGGAGTGAAAGTCCTGCTTTTAAGGTGGGAATTGCTTTGGAAACTGTGGAGCTTGAGTGCAGGAGAGGTTAGCGGAATTCCCGGTGTAGCGGTGAAATGCGTAGAGATCGGGAGGAACACCAGTGGCGAAGGCGGCTAACTGGACTGTAACTGACGCTGAGG…	Firmicutes	Clostridia_1	Clostridiales	Lachnospiraceae	Gut_cluster_13
ACTCCTACGGGAGGCAGCAGTGGGGAATATTGCACAATGGGGGAAACCCTGATGCAGCGACGCCGCGTGAGTGAAGACGGCCTTCGGGTTGTAAAGCTCTGTTGCGGGGGACGATAATGACGGTACCCCGTGAGGAAGCCACGGCTAACTACGTGCCAGCAGCCGCGGTAATACGTAGGTGGCAAGCGTTGTCCGGAATTACTGGGTGTAAAGGGAGCGTAGGCGGGCAATTAAGTTGGATGTGAAATCTACAGGCTTAACCTGTAGCGTGCATCCAAAACTGAATGTCTTGAGTGATGTAGAGGCAGGCGGAATTCCTAGTGTAGCGGTGAAATGCGTAGATATTAGGAGGAACACCAGTGGCGAAGGCGGCCTGCTGGGCATTAACTGACGCTGAGG…	Firmicutes	Clostridia_1	Clostridiales	Ruminococcaceae	Insect_cluster
ACTCCTACGGGAGGCAGCAGTGAGGAATATTGGTCAATGGGCGAGAGCCTGAACCAGCCATGCCGCGTGCAGGATGACGGCCCTACGGGTTGTAAACTGCTTTTGTACGGGGGCAAACCCTTCTTTGCGAAGGAGGTTGAGAGTACCGTACGAATAAGGATCGGCTAACTCCGTGCCAGCAGCCGCGGTAATACGGAGGATCCGAGCGTTATCCGGATTCATTGGGTTTAAAGGGTGCGTAGGCGGCCAAGTAAGTCAGCGGTGAAAGGCTGGGGCTCAACCCTAGCAGCGCCGTTGATACTGCTTGGCTTGAGAGCAGATGAAGCCGGCGGAATGTGCAGTGTAGCGGTGAAATGCATAGATATTGCACAGAAGGCCGATTGCGAAGGCAGCTGGCTA…	Bacteroidetes	Bacteroidia	Bacteroidales	Rikenellaceae	gut_cluster_c
ACTCCTACGGGAGGCAGCAGTGGGGAATATTGCACAATGGGCGCAAGCCTGATGCAGCCATGCCGCGTGTATGAAGAAGGCCTTCGGGTTGTAAAGTACTTTCAGCGGGGAGGAAGGGAGTGTGTTTAATACGCACATTCATTGACGTTACCCGCAGAAGAAGCACCGGCTAACTCCGTGCCAGCAGCCGCGGTAATACGGAGGGTGCAAGCGTTAATCGGAATTACTGGGCGTAAAGCGCACGCAGGCGGTCTGTTAAGTCAGATGTGAAATCCCCGGGCTCAACCCGGGAACTGCATTTGAAACTGGCAGGCTTGAGTCTCGTAGAGGGGGGTGGAATTCCAGGTGTAGCGGTGAAATGCGTAGAGATCTGGAGGAATACCGGTGGCGAAGGCGGCC…	Proteobacteria	Gammaproteobacteria_1	Enterobacteriales	Enterobacteriaceae	Escherichia_blattae_cluster
ACTCCTACGGGAGGCAGCAGTGAGGAATATTGGTCAATGGCCGTAAGGCTGAACCAGCCAAGTAGCGTGAAGGATGACGGCCCTATGGGTTGTAAACTTCTTTTATATGGGAATAACGTTACCCACGTGTGGGTATGTGCATGTACCATGTGAATAAGGATCGGCTAACTCCGTGCCAGCAGCCGCGGTAATACGGAGGATCCGAGCGTTATCCGGATTTATTGGGTTTAAAGGGAGCGTAGGCGGGATCTCAAGTCAGCTGTGAAATGTAGATGCTCAACATCTGCACTGCAGTTGAAACTGGTATTCTTGAGTGCGTAAGAGGTAGGCGGAATTCGTCGTGTAGCGGTGAAATGCATAGATATGACGAAGAACTCCGATTGCGAAGGCAGCTTACTG…	Bacteroidetes	Bacteroidia	Bacteroidales	Bacteroidales_UCG-001	NA
ACTCCTACGGGAGGCAGCAGTGGGGAATATTGCACAATGGACGGAAGTCTGATGCAGCAACGCCGCGTGGAGGATGACACATTTCGGTGCGTAAACTCCTTTTATGTAAGAAGATAATGACGGTATTATATGAATAAGCACCGGCTAACTCCGTGCCAGCAGCCGCGGTAATACGGGGGGTGCAAGCGTTACTCGGAATCACTGGGCGTAAAGAGCGTGTAGGCGGATTGATAAGTTTGAAGTGAAATCCTATAGCTTAACTATAGAACTGCTTTGAAAACTGTTAGTCTAGAATGTGGGAGAGGTAGATGGAATTTCTGGTGTAGGGGTAAAATCCGTAGAGATCAGAAGGAATACCGATTGCGAAGGCGATCTACTGGAACAATATTGACGCTGAGA…	Proteobacteria	Epsilonproteobacteria	Campylobacterales	Campylobacteraceae	Arcobacter
ACTCCTACGGGAGGCAGCAGTGGGGAATATTGCACAATGGGGGAAACCCTGATGCAGCGACGCCGCGTGAGTGAAGACGGCCTTCGGGTTGTAAAGCTCTGTTGCGGGGGACGATAATGACGGTACCCCGTGAGGAAGCCACGGCTAACTACGTGCCAGCAGCCGCGGTAATACGTAGGTGGCAAGCGTTGTCCGGAATTACTGGGTGTAAAGGGAGCGTAGGCGGGCAATTAAGTTGGATGTGAAATCTACAGGCTTAACCTGTAGCGTGCATCCAAAACTGAATGTCTTGAGTGATGTAGAGGCAGGCGGAATTCCTAGTGTAGCGGTGAAATGCGTAGATATTAGGAGGAACACCAGTGGCGAAGGCGGCCTGCTGGGCATTAACTGACGCTGAGG…	Firmicutes	Clostridia_1	Clostridiales	Ruminococcaceae	Insect_cluster
ACTCCTACGGGAGGCAGCAGTGAGGAATATTGGTCAATGGCCGTAAGGCTGAACCAGCCAAGTAGCGTGAAGGATGACGGCCCTATGGGTTGTAAACTTCTTTTATATGGGAATAACGTTACCCACGTGTGGGTATGTGCATGTACCATGTGAATAAGGATCGGCTAACTCCGTGCCAGCAGCCGCGGTAATACGGAGGATCCGAGCGTTATCCGGATTTATTGGGTTTAAAGGGAGCGTAGGCGGGATCTCAAGTCAGCTGTGAAATGTAGATGCTCAACATCTGCACTGCAGTTGAAACTGGTATTCTTGAGTGCGTAAGAGGTAGGCGGAATTCGTCGTGTAGCGGTGAAATGCATAGATATGACGAAGAACTCCGATTGCGAAGGCAGCTTACTG…	Bacteroidetes	Bacteroidia	Bacteroidales	Bacteroidales_UCG-001	NA
ACTCCTACGGGAGGCAGCAGTGGGGAATATTGCACAATGGGGGAAACCCTGATGCAGCGACGCCGCGTGAAGGAAGAAGTATTTCGGTATGTAAACTTCTATCAGCAGGGAAGAAAATGACGGTACCTGACTAAGAAGCCCCGGCTAATTACGTGCCAGCAGCCGCGGTAATACGTAAGGGGCAAGCGTTATCCGGATTTACTGGGTGTAAAGGGAGCGTAGACGGCTGTGTAAGTCAGATGTGAAAGCCCGGGGCTCAACCCCGGGACTGCATTTGAAACTATGCAGCTAGAGTGTCGGAGAGGTAAGCGGAATTCCTAGTGTAGCGGTGAAATGCGTAGATATTAGGAGGAACACCAGTGGCGAAGGCGGCTTACTGGACGATGACTGACGTTGAGG…	Firmicutes	Clostridia_1	Clostridiales	Lachnospiraceae	Robinsoniella_Insects
ACTCCTACGGGAGGCAGCAGTGAGGAATATTGGTCAATGGACGCAAGTCTGAACCAGCCATGCCGCGTGCAGGAAGACGGCTCTATGAGTTGTAAACTGCTTTTGTACGAGGGTAAACCCTGATACGTGTATCAGGCTGAAAGTATCGTACGAATAAGGATCGGCTAACTCCGTGCCAGCAGCCGCGGTAATACGGAGGATCCAAGCGTTATCCGGATTTATTGGGTTTAAAGGGTGCGTAGGCGGTTTGTTAAGTTAGAGGTGAAATTCCGTGGCTCAACCACGGCACTGCCTCTGATACTGGCAGGCTAGAGAATGGTTGCTGTGGGCGGAATGTGTGGTGTAGCGGTGAAATGCTTAGAGATCACACAGAACACCGATTGCGAAGGCAGCTCACAA…	Bacteroidetes	Bacteroidia	Bacteroidales	Rikenellaceae	Alisitpes_IV
ACTCCTACGGGAGGCAGCAGTGGGGGATATTGCACAATGGGCGAAAGCCTGATGCAGCGACGCCGCGTGAGGGAAGAAGGTTTTCGGATTGTAAACCTCTGTCTTCGGGGACGATAATGACGGTACCCGAGGAGGAAGCCACGGCTAACTACGTGCCAGCAGCCGCGGTAAAACGTAGGTGGCAAGCGTTGTCCGGAATTACTGGGTGTAAAGGGAGCGCAGGCGGGGTGCCAAGTTGGGCGTGAAAACTATGGGCTCAACCCATAGATTGCGCTCAAAACTGGCGCTCTTGAGTGATGGAGAGGCAGGCGGAATTCCCGGTGTAGCGGTGGAATGCGTAGATATCGGGAGGAACACCAGTGGCGAAGGCGGCCTGCTGGACATTAACTGACGCTGAGG…	Firmicutes	Clostridia_1	Clostridiales	Ruminococcaceae	Termite_cockroach_cluster
ACTCCTACGGGAGGCAGCAGTGGGGAATATTGGGCAATGGGCGAAAGCCTGACCCAGCAACGCCGCGTGAGTGAAGAAGGCCTTCGGGTTGTAAAACTCTGTCGCAGGGGACGAAAGAAATGACGGTACCCTGCAAGGAAGCCCCGGCTAACTACGTGCCAGCAGCCGCGGTAATACGTAGGGGGCGAGCGTTGTCCGGAATTACTGGGCGTAAAGGGAGCGTAGGCGGCTGTTTAAGTTGGATGTGAAATACCCGGGCTTAACTTGGGGGGTGCATTCAAAACTGGGCAGCTAGAGTGCAGGAGAGGGAAGCGGAATTCCTAGTGTAGCGGTGAAATGCGTAGATATTAGGAGGAACACCAGTGGCGAAGGCGGCTTTCTGGACTGTAACTGACGCTG…	Firmicutes	Clostridia_1	Clostridiales	Clostridiaceae_1	Arthropod_cluster
ACTCCTACGGGAGGCAGCAGTGAGGAATATTGGTCAATGGGGGCAACCCTGAACCAGCCATGCCGCGTGCAGGAAGACGGCTCTATGAGTTGTAAACTGCTTTTGTAGATGGATAAATCACGGTACGCGTACCGTGTTGCAGGTAGTCTACGAATAAGGATCGGCTAACTCCGTGCCAGCAGCCGCGGTAATACGGAGGATCCGAGCGTTATCCGGATTTATTGGGTTTAAAGGGTGCGTAGGCGGCACGGTAAGTTAGAGGTGAAATGCGGTGGCTCAACCACCGAACTGCCTCTGATACTGCCGGGCTAGAGATTAGATGCGGTAGGCGGAATGTGTGGTGTAGCGGTGAAATGCTTAGAGATCACACAGAACACCGATTGCGAAGGCAGCTTACCA…	Bacteroidetes	Bacteroidia	Bacteroidales	Rikenellaceae	Alistipes_II
ACTCCTACGGGAGGCAGCAGTGAGGAATATTGGTCAATGGCCGTAAGGCTGAACCAGCCAAGTAGCGTGAAGGATGACGGCCCTATGGGTTGTAAACTTCTTTTATATGGGAATAACGTTACCCACGTGTGGGTATGTGCATGTACCATGTGAATAAGGATCGGCTAACTCCGTGCCAGCAGCCGCGGTAATACGGAGGATCCGAGCGTTATCCGGATTTATTGGGTTTAAAGGGAGCGTAGGCGGGATCTCAAGTCAGCTGTGAAATGTAGATGCTCAACATCTGCACTGCAGTTGAAACTGGTATTCTTGAGTGCGTAAGAGGTAGGCGGAATTCGTCGTGTAGCGGTGAAATGCATAGATATGACGAAGAACTCCGATTGCGAAGGCAGCTTACTG…	Bacteroidetes	Bacteroidia	Bacteroidales	Bacteroidales_UCG-001	NA
ACTCCTACGGGAGGCAGCAGTGAGGAATATTGGTCAATGGGGGCAACCCTGAACCAGCCATGCCGCGTGCAGGAAGACGGCTCTATGAGTTGTAAACTGCTTTTACACAGGGATAAACCGGCGTACGTGTACGTCGTTGAAGGTACTGTGGGAATAAGGATCGGCTAACTCCGTGCCAGCAGCCGCGGTAATACGGAGGATCCCAGCGTTATCCGGATTTATTGGGTTTAAAGGGTGCGTAGGCGGCACGGTAAGTTAGCGGTGAAATCTCGGGGCTTAACCCCGAAATTGCCGTTAAAACTGCCGGGCTAGAGAGTAGATGCGGTAGGCGGAATGTGTAGTGTAGCGGTGAAATGCTTAGAGATTACACAGAACACCGATTGCGAAGGCAGCTTACCA…	Bacteroidetes	Bacteroidia	Bacteroidales	Rikenellaceae	Alistipes_II
ACTCCTACGGGAGGCAGCAGTGAGGAATATTGGTCAATGGGGGCAACCCTGAACCAGCCATGCCGCGTGCAGGAAGACGGCTCTATGAGTTGTAAACTGCTTTTGTAGATGGATAAATCACGGTACGCGTACCGTGTTGCAGGTAGTCTACGAATAAGGATCGGCTAACTCCGTGCCAGCAGCCGCGGTAATACGGAGGATCCGAGCGTTATCCGGATTTATTGGGTTTAAAGGGTGCGTAGGCGGCACGGTAAGTTAGAGGTGAAATGCGGTGGCTCAACCACCGAACTGCCTCTGATACTGCCGGGCTAGAGATTAGATGCGGTAGGCGGAATGTGTGGTGTAGCGGTGAAATGCTTAGAGATCACACAGAACACCGATTGCGAAGGCAGCTTACCA…	Bacteroidetes	Bacteroidia	Bacteroidales	Rikenellaceae	Alistipes_II
ACTCCTACGGGAGGCAGCAGTGGGGGATATTGCACAATGGGCGAAAGCCTGATGCAGCGACGCCGCGTGAGGGAAGAAGGTTTTCGGATTGTAAACCTCTGTCTTCGGGGACGATAATGACGGTACCCGAGGAGGAAGCCACGGCTAACTACGTGCCAGCAGCCGCGGTAAAACGTAGGTGGCAAGCGTTGTCCGGAATTACTGGGTGTAAAGGGAGCGCAGGCGGGGTGCCAAGTTGGGCGTGAAAACTATGGGCTCAACCCATAGATTGCGCTCAAAACTGGCGCTCTTGAGTGATGGAGAGGCAGGCGGAATTCCCGGTGTAGCGGTGGAATGCGTAGATATCGGGAGGAACACCAGTGGCGAAGGCGGCCTGCTGGACATTAACTGACGCTGAGG…	Firmicutes	Clostridia_1	Clostridiales	Ruminococcaceae	Termite_cockroach_cluster
ACTCCTACGGGAGGCAGCAGTGGGGAATATTGCGCAATGGGCGAAAGCCTGACGCAGCGACGCCGCGTGAGGGATGAAGGCCTTCGGGTCGTAAACCTCTGTCAGGAGGGAAGAAATGGTGAGGCGCTAATCAGCTTCATCTTGACGGTACCTCCAAAGGAAGCACCGGCTAACTCCGTGCCAGCAGCCGCGGTAATACGGAGGGTGCAAGCGTTAATCGGAATCACTGGGCGTAAAGCGCGCGTAGGCTGCTTTGTAAGTCAGGGGTGAAATCCCACGGCTCAACCGTGGAACTGCCCTTGATACTGCATTGCTTGAGTTTGTGAGAGGATAGCGGAATTCCTGGTGTAGGAGTGAAATCCGTAGAGATCAGGAGGAACATCGGTGGCGAAGGCGGCT…	Proteobacteria	Deltaproteobacteria	Desulfovibrionales	Desulfovibrionaceae	Gut_cluster_3
ACTCCTACGGGAGGCAGCAGTGGGGAATATTGCACAATGGACGGAAGTCTGATGCAGCAACGCCGCGTGGAGGATGACACATTTCGGTGCGTAAACTCCTTTTATGTAAGAAGATAATGACGGTATTATATGAATAAGCACCGGCTAACTCCGTGCCAGCAGCCGCGGTAATACGGGGGGTGCAAGCGTTACTCGGAATCACTGGGCGTAAAGAGCGTGTAGGCGGATTGATAAGTTTGAAGTGAAATCCTATAGCTTAACTATAGAATTGCTTTGAAAACTGTTAGTCTAGAATGTGGGAGAGGTAGATGGAATTTCTGGTGTAGGGGTAAAATCCGTAGAGATCAGAAGGAATACCGATTGCGAAGGCGATCTACTGGAACAATATTGACGCTGAGA…	Proteobacteria	Epsilonproteobacteria	Campylobacterales	Campylobacteraceae	Arcobacter
ACTCCTACGGGAGGCAGCAGTGGGGGATATTGCACAATGGGCGAAAGCCTGATGCAGCGACGCCGCGTGAGGGAAGAAGGTTTTCGGATTGTAAACCTCTGTCTTCGAGGACGAAGAAGTGACGGTACTCGAGGAGGAAGCCACGGCTAACTACGTGCCAGCAGCCGCGGTAAAACGTAGGTGGCAAGCGTTGTCCGGAATTACTGGGTGTAAAGGGAGCGCAGGCGGGGCGATAAGTTGAATGTGAAATGTATGGGCTCAACCCATAGACTGCGTTCAAAACTATCGTTCTTGAGTGATGTAGAGGCAGGCGGAATTCCCGGTGTAGCGGTGGAATGCGTAGATATCGGGAGGAACACCAGTGGCGAAGGCGGCCTGCTGGGCATAAACTGACGCTGA…	Firmicutes	Clostridia_1	Clostridiales	Ruminococcaceae	Termite_cockroach_cluster
ACTCCTACGGGAGGCAGCAGTGAGGAATATTGGTCAATGGACGCAAGTCTGAACCAGCCATGCCGCGTGCAGGAAGACGGCTCTATGAGTTGTAAACTGCTTTTGTGCGAGGGTAAACCCCGGTACGTGTACCGGGCTGAAAGTATCGTACGAATAAGGATCGGCTAACTCCGTGCCAGCAGCCGCGGTAATACGGAGGATCCAAGCGTTATCCGGATTTATTGGGTTTAAAGGGTGCGTAGGCGGTTTGTTAAGTTAGAGGTGAAATCCCGTGGCTCAACCACGGAACTGCCTCTGATACTGGCAGGCTAGAGAATGGTTGCTGTGGGCGGAATGTGTGGTGTAGCGGTGAAATGCTTAGAGATCACACAGAACACCGATTGCGAAGGCAGCTCACAA…	Bacteroidetes	Bacteroidia	Bacteroidales	Rikenellaceae	Alisitpes_IV
ACTCCTACGGGAGGCAGCAGTGGGGAATATTGGGCAATGGGCGAAAGCCTGACCCAGCAACGCCGCGTGAAGGAAGAAGGTTTTCGGATCGTAAACTTCTATCCCGGGTGAAGATAATGACGGTAGCCCGGAAGGAAGCCCCGGCTAACTACGTGCCAGCAGCCGCGGTAATACGTAGGGGGCAAGCGTTGTCCGGAATGATTGGGCGTAAAGGGCGCGTAGGCGGCTCTGTAAGTCTGGAGTGAAAGTCCTGCTTTTAAGGTGGGAATTGCTTTGGAAACTGTGGAGCTTGAGTGCAGGAGAGGTTAGCGGAATTCCCGGTGTAGCGGTGAAATGCGTAGAGATCGGGAGGAACACCAGTGGCGAAGGCGGCTAACTGGACTGTAACTGACGCTGAGG…	Firmicutes	Clostridia_1	Clostridiales	Lachnospiraceae	Gut_cluster_13
ACTCCTACGGGAGGCAGCAGTGGGGAATATTGGGCAATGGGCGAAAGCCTGACCCAGCAACGCCGCGTGAAGGAAGAAGGTTTTCGGATCGTAAACTTCTATCCCGGGTGAAGATAATGACGGTAGCCCGGAAGGAAGCCCCGGCTAACTACGTGCCAGCAGCCGCGGTAATACGTAGGGGGCAAGCGTTGTCCGGAATGATTGGGCGTAAAGGGCGCGTAGGCGGCTCTGTAAGTCTGGAGTGAAAGTCCTGCTTTTAAGGTGGGAATTGCTTTGGAAACTGTGGAGCTTGAGTGCAGGAGAGGTTAGCGGAATTCCCGGTGTAGCGGTGAAATGCGTAGAGATCGGGAGGAACACCAGTGGCGAAGGCGGCTAACTGGACTGTAACTGACGCTGAGG…	Firmicutes	Clostridia_1	Clostridiales	Lachnospiraceae	Gut_cluster_13
ACTCCTACGGGAGGCAGCAGTGGGGAATATTGCACAATGGGCGAAAGCCTGATGCAGCAACGCCGCGTGAGTGATGAAGGTCTTCGGATTGTAAAGCTCTTTGATTAGGGACGATAATGACGGTACCTAAAGAACAAGCCACGGCTAACTACGTGCCAGCAGCCGCGGTAATACGTAGGTGGCAAGCGTTGTCCGGATTTATTGGGCGTAAAGGGAGCGTAGGCGGACCTTTAAGTCAGATGTGAAATACCCAGGGCTCAACCCGGGTGCTGCATTTGATACTGGAGGTCTAGAGTACAGGAGAGGAGAGTGGAATTCCTAGTGTAGCGGTGAAATGCGTAGAGATTAGGAAGAACACCAGTGGCGAAGGCGACTCTCTGGACTGTAACTGACGCTGAG…	Firmicutes	Clostridia_1	Clostridiales	Clostridiaceae_1	Arthropod_cluster
ACTCCTACGGGAGGCAGCAGTAAGGAATATTGGGCAATGGACGCAAGTCTGACCCAGCCATGCCGCGTGAAGGAAGACAGCCCTATGGGTTGTAAACTTCTTTTAACAGAGGATAAAGTCGCGTATGTATACGCGTTTGCAGGTATCTGTTGAATAAGCATCGGCTAACTCCGTGCCAGCAGCCGCGGTAATACGGAGGATGCAAGCGTTATCCGGATTCATTGGGTTTAAAGGGTGCGCAGGCGGACTTTTAAGTCAGCGGTGAAATTCCACGGCTCAACCGTGGCGCTGCCGTTGATACTGGGAGTCTTGAGTGTGATTGAGGTGGGCGGAATGTAGCGTGTAGCGGTGAAATGCATAGATATGCTACAGAACACCAATTGCGAAGGCAGCTCACCA…	Bacteroidetes	Sphingobacteria	Sphingobacteriales_1	SB_1	Termite_cluster
ACTCCTACGGGAGGCAGCAGTGGGGAATTTTGCGCAATGGGCGAAAGCCTGACGCAGCAACGCCGCGTGCGGGATGAAGGCCTTCGGGTTGTAAACCGCTTTCAGTAGGGAAGATTATGACGGTACCTACAGAAGAAGCTCCGGCTAACTACGTGCCAGCAGCCGCGGTAATACGTAGGGAGCAAGCGTTATCCGGATTCATTGGGCGTAAAGAGCGCGTAGGCGGCTTGTTAAGCAAGGTGTTAAATCTGAGGGCTCAACCCCCAGCCGCACCTTGAACTGGCAGGCTTGAGTTTGGTAGAGGAAGGTGGAATTCCCAGTGTAGCGGTGGAATGCGCAGATATTGGGAAGAACACCGGTGGCGAAGGCGGCCTTCTGGGCCATAACTGACGCTGAGGC…	Actinobacteria	Actinobacteria	Coriobacteriales	Coriobacteriaceae	Uncultured_10
ACTCCTACGGGAGGCAGCAGTGGGGAATATTGCACAATGGGCGCAAGCCTGATGCAGCCATGCCGCGTGTATGAAGAAGGCCTTCGGGTTGTAAAGTACTTTCAGCGGGGAGGAAGGGAGTGTGTTTAATACGCACATTCATTGACGTTACCCGCAGAAGAAGCACCGGCTAACTCCGTGCCAGCAGCCGCGGTAATACGGAGGGTGCAAGCGTTAATCGGAATTACTGGGCGTAAAGCGCACGCAGGCGGTCTGTTAAGTCAGATGTGAAATCCCCGGGCTCAACCCGGGAACTGCATTTGAAACTGGCAGGCTTGAGTCTCGTAGAGGGGGGTGGAATTCCAGGTGTAGCGGTGAAATGCGTAGAGATCTGGAGGAATACCGGTGGCGAAGGCGGCC…	Proteobacteria	Gammaproteobacteria_1	Enterobacteriales	Enterobacteriaceae	Escherichia_blattae_cluster
ACTCCTACGGGAGGCAGCAGTGGGGAATATTGCACAATGGGGGAAACCCTGATGCAGCGACGCCGCGTGAAGGAAGAAGTATTTCGGTATGTAAACTTCTATCAGCAGGGAAGAAAATGACGGTACCTGACTAAGAAGCCCCGGCTAATTACGTGCCAGCAGCCGCGGTAATACGTAAGGGGCAAGCGTTATCCGGATTTACTGGGTGTAAAGGGAGCGTAGACGGCTATGTAAGTCAGATGTGAAAGCCCGGGGCTCAACCCCGGGACTGCATTTGAAACTATGTAGCTAGAGTGTCGGAGAGGTAAGTGGAATTCCTAGTGTAGCGGTGGAATGCGTAGATATTAGGAGGAACACCAGTGGCGAAGGCGACTTACTGGACGATGACTGACGTTGAGG…	Firmicutes	Clostridia_1	Clostridiales	Lachnospiraceae	Robinsoniella_Insects
ACTCCTACGGGAGGCAGCAGTGAGGAATATTGGTCAATGGGCGAGAGCCTGAACCAGCCAAATCGCGTGAAGGAAGACTGCCTTATGGGTTGTAAACTTCTTTTATACAGGAATAAAAAGAGTTACGTGTAACTTATTGCATGTACTGTATGAATAAGCATCGGCTAACTCCGTGCCAGCAGCCGCGGTAATACGGAGGATGCGAGCGTTATCCGGATTTATTGGGTTTAAAGGGTGCGCAGGCGGGAACTTAAGTCAGCGGTGAAATCTTGACGCTTAACGTCGAAACTGCCGTTGAAACTGGGTTTCTTGAGTATAGATGAAGTAGGCGGAATTCGTTGTGTAGCGGTGACATGCTTAGATATAACGAGGAACTCCGATTGCGTAGGCAGCTTACTA…	Bacteroidetes	Bacteroidia	Bacteroidales	Porphyromonadaceae_1	Dysgonomonas
ACTCCTACGGGAGGCAGCAGTGGGGAATATTGCACAATGGGGGAAACCCTGATGCAGCGACGCCGCGTGAAGGAAGAAGTATTTCGGTATGTAAACTTCTATCAGCAGGGAAGAAAATGACGGTACCTGACTAAGAAGCCCCGGCTAATTACGTGCCAGCAGCCGCGGTAATACGTAAGGGGCAAGCGTTATCCGGATTTACTGGGTGTAAAGGGAGCGTAGACGGCTATGTAAGTCAGATGTGAAAGCCCGGGGCTCAACCCCGGGACTGCATTTGAAACTATGTAGCTAGAGTGTCGGAGAGGTAAGTGGAATTCCTAGTGTAGCGGTGGAATGCGTAGATATTAGGAGGAACACCAGTGGCGAAGGCGACTTACTGGACGATGACTGACGTTGAGG…	Firmicutes	Clostridia_1	Clostridiales	Lachnospiraceae	Robinsoniella_Insects
ACTCCTACGGGAGGCAGCAGTGGGGAATATTGCACAATGGGGGAAACCCTGATGCAGCAACGCCGCGTGGAGGATGACGCATTTCGGTGTGTAAACTCCTTTTATTTGGGAAGATAATGACGGTACCAAATGAATAAGCACCGGCTAACTCCGTGCCAGCAGCCGCGGTAATACGGAGGGTGCAAGCGTTACTCGGAATCACTGGGCGTAAAGGGTGCGTAGGCGGGTTATCAAGTCTTAAGTGAAATCCAACAGCTTAACTGTTGAACTGCTTAGGAAACTGGCAACCTAGAGTAAGGGAGAGGTAGATGGAATTGGTGGTGTAGGGGTAAAATCCGTAGATATCACCAGGAATACTCATTGCGAAGGCGATCTACTGGAACTTAACTGACGCTGAGG…	Proteobacteria	Epsilonproteobacteria	Campylobacterales	Campylobacteraceae	Sulfurospirillum
ACTCCTACGGGAGGCAGCAGTGGGGAATATTGCACAATGGGCGAAAGCCTGATGCAGCAACGCCGCGTGAGTGATGAAGGTCTTCGGATTGTAAAGCTCTTTGATTAGGGACGATAATGACGGTACCTAAAGAACAAGCCACGGCTAACTACGTGCCAGCAGCCGCGGTAATACGTAGGTGGCAAGCGTTGTCCGGATTTATTGGGCGTAAAGGGAGCGTAGGCGGACCTTTAAGTCAGATGTGAAATACCCAGGGCTCAACCCGGGTGCTGCATTTGATACTGGAGGTCTAGAGTACAGGAGAGGAGAGTGGAATTCCTAGTGTAGCGGTGAAATGCGTAGAGATTAGGAAGAACACCAGTGGCGAAGGCGACTCTCTGGACTGTAACTGACGCTGAG…	Firmicutes	Clostridia_1	Clostridiales	Clostridiaceae_1	Arthropod_cluster
ACTCCTACGGGAGGCAGCAGTGGGGAATATTGCACAATGGACGGAAGTCTGATGCAGCAACGCCGCGTGGAGGATGACACATTTCGGTGCGTAAACTCCTTTTATGTAAGAAGATAATGACGGTATTATATGAATAAGCACCGGCTAACTCCGTGCCAGCAGCCGCGGTAATACGGGGGGTGCAAGCGTTACTCGGAATCACTGGGCGTAAAGAGCGTGTAGGCGGATTGATAAGTTTGAAGTGAAATCCTATAGCTTAACTATAGAATTGCTTTGAAAACTGTTAGTCTAGAATGTGGGAGAGGTAGATGGAATTTCTGGTGTAGGGGTAAAATCCGTAGAGATCAGAAGGAATACCGATTGCGAAGGCGATCTACTGGAACAATATTGACGCTGAGA…	Proteobacteria	Epsilonproteobacteria	Campylobacterales	Campylobacteraceae	Arcobacter
ACTCCTACGGGAGGCAGCAGTGGGGAATATTGCACAATGGGGGAAACCCTGATGCAGCAACGCCGCGTGGAGGATGACGCATTTCGGTGTGTAAACTCCTTTTATTTGGGAAGATAATGACGGTACCAAATGAATAAGCACCGGCTAACTCCGTGCCAGCAGCCGCGGTAATACGGAGGGTGCAAGCGTTACTCGGAATCACTGGGCGTAAAGGGTGCGTAGGCGGGTTATCAAGTCTTAAGTGAAATCCAACAGCTTAACTGTTGAACTGCTTAGGAAACTGGCAACCTAGAGTAAGGGAGAGGTAGATGGAATTGGTGGTGTAGGGGTAAAATCCGTAGATATCACCAGGAATACTCATTGCGAAGGCGATCTACTGGAACTTAACTGACGCTGAGG…	Proteobacteria	Epsilonproteobacteria	Campylobacterales	Campylobacteraceae	Sulfurospirillum
ACTCCTACGGGAGGCAGCAGTGGGGAATATTGCACAATGGGCGCAAGCCTGATGCAGCCATGCCGCGTGTATGAAGAAGGCCTTCGGGTTGTAAAGTACTTTCAGCGGGGAGGAAGGGAGTGTGTTTAATACGCACATTCATTGACGTTACCCGCAGAAGAAGCACCGGCTAACTCCGTGCCAGCAGCCGCGGTAATACGGAGGGTGCAAGCGTTAATCGGAATTACTGGGCGTAAAGCGCACGCAGGCGGTCTGTTAAGTCAGATGTGAAATCCCCGGGCTCAACCCGGGAACTGCATTTGAAACTGGCAGGCTTGAGTCTCGTAGAGGGGGGTGGAATTCCAGGTGTAGCGGTGAAATGCGTAGAGATCTGGAGGAATACCGGTGGCGAAGGCGGCC…	Proteobacteria	Gammaproteobacteria_1	Enterobacteriales	Enterobacteriaceae	Escherichia_blattae_cluster
ACTCCTACGGGAGGCAGCAGTGGGGAATATTGCGCAATGGACGAAAGTCTGACGCAGCGACGCCGCGTGAGGGATGAAGGCCTTCGGGTCGTAAACCTCTGTCAGGAGGGAAGAACAAGCCACGTGCTAATCAGCGTGGCCCTGACGGTACCTCCAAAGGAAGCACCGGCTAACTCCGTGCCAGCAGCCGCGGTAATACGGAGGGTGCAAGCGTTAATCGGAATCACTGGGCGTAAAGCGCGCGTAGGCGGCTTTGTAAGTCAGAGGTGAAATCCCACGGCTCACCCGTGGAACTGCCTTTGATACTGCATTGCTTGAGTGTGTGAGAGGATGGCGGAATTCCAGGTGTAGGAGTGAAATCCGTAGAGATCTGGAGGAACATCAGTGGCGAAGGCGGCC…	Proteobacteria	Deltaproteobacteria	Desulfovibrionales	Desulfovibrionaceae	Gut_cluster_3
ACTCCTACGGGAGGCAGCAGTGGGGAATATTGCACAATGGGCGCAAGCCTGATGCAGCCATGCCGCGTGTATGAAGAAGGCCTTCGGGTTGTAAAGTACTTTCAGCGAGGAGGAAGGCATTGTGGTTAATAACCGCAGTGATTGACGTTACTCGCAGAAGAAGCACCGGCTAACTCCGTGCCAGCAGCCGCGGTAATACGGAGGGTGCAAGCGTTAATCGGAATTACTGGGCGTAAAGCGCACGCAGGCGGTCTGTCAAGTCGGATGTGAAATCCCCGGGCTCAACCTGGGAACTGCATTCGAAACTGGCAGGCTAGAGTCTTGTAGAGGGGGGTAGAATTCCAGGTGTAGCGGTGAAATGCGTAGAGATCTGGAGGAATACCGGTGGCGAAGGCGGCC…	Proteobacteria	Gammaproteobacteria_1	Enterobacteriales	Enterobacteriaceae	Escherichia_blattae_cluster
ACTCCTACGGGAGGCAGCAGTGGGGAATATTGCACAATGGGCGCAAGCCTGATGCAGCCATGCCGCGTGTATGAAGAAGGCCTTCGGGTTGTAAAGTACTTTCAGCGAGGAGGAAGGCATTGTGGTTAATAACCGCAGTGATTGACGTTACTCGCAGAAGAAGCACCGGCTAACTCCGTGCCAGCAGCCGCGGTAATACGGAGGGTGCAAGCGTTAATCGGAATTACTGGGCGTAAAGCGCACGCAGGCGGTCTGTCAAGTCGGATGTGAAATCCCCGGGCTCAACCTGGGAACTGCATTCGAAACTGGCAGGCTAGAGTCTTGTAGAGGGGGGTAGAATTCCAGGTGTAGCGGTGAAATGCGTAGAGATCTGGAGGAATACCGGTGGCGAAGGCGGCC…	Proteobacteria	Gammaproteobacteria_1	Enterobacteriales	Enterobacteriaceae	Escherichia_blattae_cluster
ACTCCTACGGGAGGCAGCAGTGGGGAATATTGCACAATGGGCGAAAGCCTGATGCAGCGATGCCGCGTGAGGGAAGAAGGTTTTCGGATTGTAAACCTCTGTCAACGGGGACGATAATGACGGTACCCGAGAAGGAAGCTCCGGCTAACTACGTGCCAGCAGCCGCGGTAATACGTAGGGAGCGAGCGTTGTCCGGAATTACTGGGTGTAAAGGGAGTGTAGGCGGGACGGTAAGTTAGGCGTGAAATGTATGGGCTCAACCCATAAACTGCGCTTAAAACTGCTGTTCTTGAGTGAAGTAGAGGCAAGCGGAATTCCCAGTGTAGCGGTGAAATGCGTAGATATTGGGAGGAACACCAGTGGCGAAGGCGGCTTGCTGGGCTTTTACTGACGCTGAGG…	Firmicutes	Clostridia_1	Clostridiales	Ruminococcaceae	Termite_cockroach_cluster
ACTCCTACGGGAGGCAGCAGTGGGGAATATTGCACAATGGGCGCAAGCCTGATGCAGCCATGCCGCGTGTATGAAGAAGGCCTTCGGGTTGTAAAGTACTTTCAGCGGGGAGGAAGGGAGTGTGCTTAATACGCACATTCATTGACGTTACCCGCAGAAGAAGCACCGGCTAACTCCGTGCCAGCAGCCGCGGTAATACGGAGGGTGCAAGCGTTAATCGGAATTACTGGGCGTAAAGCGCACGCAGGCGGTCTGTTAAGTCAGATGTGAAATCCCCGGGCTCAACCCGGGAACTGCATTTGAAACTGGCAGGCTTGAGTCTCGTAGAGGGGGGTGGAATTCCAGGTGTAGCGGTGAAATGCGTAGAGATCTGGAGGAATACCGGTGGCGAAGGCGGCC…	Proteobacteria	Gammaproteobacteria_1	Enterobacteriales	Enterobacteriaceae	Escherichia_blattae_cluster
ACTCCTACGGGAGGCAGCAGTGGGGGATATTGCACAATGGGCGAAAGCCTGATGCAGCGACGCCGCGTGAGGGAAGAAGGTTTTCGGATTGTAAACCTCTGTCTTCGAGGACGAAGAAGTGACGGTACTCGAGGAGGAAGCCACGGCTAACTACGTGCCAGCAGCCGCGGTAAAACGTAGGTGGCAAGCGTTGTCCGGAATTACTGGGTGTAAAGGGAGCGCAGGCGGGGCGATAAGTTGAATGTGAAATGTATGGGCTCAACCCATAGACTGCGTTCAAAACTATCGTTCTTGAGTGATGTAGAGGCAGGCGGAATTCCCGGTGTAGCGGTGGAATGCGTAGATATCGGGAGGAACACCAGTGGCGAAGGCGGCCTGCTGGGCATAAACTGACGCTGA…	Firmicutes	Clostridia_1	Clostridiales	Ruminococcaceae	Termite_cockroach_cluster
ACTCCTACGGGAGGCAGCAGTGAGGAATATTGGTCAATGGGGGCAACCCTGAACCAGCCATGCCGCGTGCAGGAAGACGGCTCTATGAGTTGTAAACTGCTTTTGTACAGGGATAATTCGTGATACGTGTATCACGTTGAAGGTACTGTACGAATAAGGATCGGCTAACTCCGTGCCAGCAGCCGCGGTAATACGGAGGATCCAAGCGTTATCCGGATTTATTGGGTTTAAAGGGTGCGTAGGCGGCACGGTAAGTTAGCGGTGAAATCTTCGGGCTCAACCCGGAAATTGCCGTTAAAACTGCCGGGCTAGAGAGTAGATGCGGTAGGCGGAATGTGTAGTGTAGCGGTGAAATGCTTAGAGATTACACAGAACACCGATTGCGAAGGCAGCTTACCA…	Bacteroidetes	Bacteroidia	Bacteroidales	Rikenellaceae	Alistipes_II
ACTCCTACGGGAGGCAGCAGTGAGGAATATTGGTCAATGGGGGCAACCCTGAACCAGCCATGCCGCGTGCAGGAAGACGGCTCTATGAGTTGTAAACTGCTTTTGTAGATGGATAAATCACGGTACGCGTACCGTGTTGCAGGTAGTCTACGAATAAGGATCGGCTAACTCCGTGCCAGCAGCCGCGGTAATACGGAGGATCCGAGCGTTATCCGGATTTATTGGGTTTAAAGGGTGCGTAGGCGGCACGGTAAGTTAGAGGTGAAATGCGGTGGCTCAACCACCGAACTGCCTCTGATACTGCCGGGCTAGAGATTAGATGCGGTAGGCGGAATGTGTGGTGTAGCGGTGAAATGCTTAGAGATCACACAGAACACCGATTGCGAAGGCAGCTTACCA…	Bacteroidetes	Bacteroidia	Bacteroidales	Rikenellaceae	Alistipes_II
ACTCCTACGGGAGGCAGCAGTGGGGAATATTGGGCAATGGGCGAAAGCCTGACCCAGCAACGCCGCGTGAAGGAAGAAGGTTTTCGGATCGTAAACTTCTATCCCGGGTGAAGATAATGACGGTAGCCCGGAAGGAAGCCCCGGCTAACTACGTGCCAGCAGCCGCGGTAATACGTAGGGGGCAAGCGTTGTCCGGAATGATTGGGCGTAAAGGGCGCGTAGGCGGCTCTGTAAGTCTGGAGTGAAAGTCCTGCTTTTAAGGTGGGAATTGCTTTGGAAACTGTGGAGCTTGAGTGCAGGAGAGGTTAGCGGAATTCCCGGTGTAGCGGTGAAATGCGTAGAGATCGGGAGGAACACCAGTGGCGAAGGCGGCTAACTGGACTGTAACTGACGCTGAGG…	Firmicutes	Clostridia_1	Clostridiales	Lachnospiraceae	Gut_cluster_13
ACTCCTACGGGAGGCAGCAGTGGGGAATATTGCACAATGGGCGAAAGCCTGATGCAGCGATGCCGCGTGAGGGAAGAAGGTTTTCGGATTGTAAACCTCTGTCAACGGGGACGATAATGACGGTACCCGAGAAGGAAGCTCCGGCTAACTACGTGCCAGCAGCCGCGGTAATACGTAGGGAGCGAGCGTTGTCCGGAATTACTGGGTGTAAAGGGAGTGTAGGCGGGACGGTAAGTTAGGCGTGAAATGTATGGGCTCAACCCATAAACTGCGCTTAAAACTGCTGTTCTTGAGTGAAGTAGAGGCAAGCGGAATTCCCAGTGTAGCGGTGAAATGCGTAGATATTGGGAGGAACACCAGTGGCGAAGGCGGCTTGCTGGGCTTTTACTGACGCTGAGG…	Firmicutes	Clostridia_1	Clostridiales	Ruminococcaceae	Termite_cockroach_cluster
ACTCCTACGGGAGGCAGCAGTGAGGAATATTGGTCAATGGGGGCAACCCTGAACCAGCCATGCCGCGTGCAGGAAGACGGCTCTATGAGTTGTAAACTGCTTTTGTACAGGGATAAATACATATACGTGTATATGTTTGAAGGTACTGTACGAATAAGGATCGGCTAACTCCGTGCCAGCAGCCGCGGTAATACGGAGGATCCGAGCGTTATCCGGATTTATTGGGTTTAAAGGGTGCGTAGGCGGCGAGGTAAGTTAGAGGTGAAATCCCGTGGCTCAACCACGGAACCGCCTCTGATACTGCTTTGCTAGAGAGTAGATGCGGTAGGCGGAATGTGTAGTGTAGCGGTGAAATGCTTAGAGATTACACAGAACACCGATTGCGAAGGCAGCTTACCA…	Bacteroidetes	Bacteroidia	Bacteroidales	Rikenellaceae	Alistipes_II
ACTCCTACGGGAGGCAGCAGTGAGGAATATTGGTCAATGGGGGCAACCCTGAACCAGCCATGCCGCGTGCAGGAAGACGGCTCTATGAGTTGTAAACTGCTTTTGTAGATGGATAAATCACGGTACGCGTACCGTGTTGCAGGTAGTCTACGAATAAGGATCGGCTAACTCCGTGCCAGCAGCCGCGGTAATACGGAGGATCCGAGCGTTATCCGGATTTATTGGGTTTAAAGGGTGCGTAGGCGGCACGGTAAGTTAGAGGTGAAATGCGGTGGCTCAACCACCGAACTGCCTCTGATACTGCCGGGCTAGAGATTAGATGCGGTAGGCGGAATGTGTGGTGTAGCGGTGAAATGCTTAGAGATCACACAGAACACCGATTGCGAAGGCAGCTTACCA…	Bacteroidetes	Bacteroidia	Bacteroidales	Rikenellaceae	Alistipes_II
ACTCCTACGGGAGGCAGCAGTGGGGAATATTGGGCAATGGGCGAAAGCCTGACCCAGCAACGCCGCGTGAAGGAAGAAGGTTTTCGGATCGTAAACTTCTATCCCGGGTGAAGATAATGACGGTAGCCCGGAAGGAAGCCCCGGCTAACTACGTGCCAGCAGCCGCGGTAATACGTAGGGGGCAAGCGTTGTCCGGAATGATTGGGCGTAAAGGGCGCGTAGGCGGCTCTGTAAGTCTGGAGTGAAAGTCCTGCTTTTAAGGTGGGAATTGCTTTGGAAACTGTGGAGCTTGAGTGCAGGAGAGGTTAGCGGAATTCCCGGTGTAGCGGTGAAATGCGTAGAGATCGGGAGGAACACCAGTGGCGAAGGCGGCTAACTGGACTGTAACTGACGCTGAGG…	Firmicutes	Clostridia_1	Clostridiales	Lachnospiraceae	Gut_cluster_13
ACTCCTACGGGAGGCAGCAGTGGGGAATATTGGGCAATGGGCGAAAGCCTGACCCAGCAACGCCGCGTGAGTGAAGAAGGCCTTCGGGTTGTAAAACTCTGTCGCAGGGGACGAAAGAAATGACGGTACCCTGCAAGGAAGCCCCGGCTAACTACGTGCCAGCAGCCGCGGTAATACGTAGGGGGCGAGCGTTGTCCGGAATTACTGGGCGTAAAGGGAGCGTAGGCGGCTGTTTAAGTTGGATGTGAAATACCCGGGCTTAACTTGGGGGGTGCATTCAAAACTGGGCAGCTAGAGTGCAGGAGAGGGAAGCGGAATTCCTAGTGTAGCGGTGAAATGCGTAGATATTAGGAGGAACACCAGTGGCGAAGGCGGCTTTCTGGACTGTAACTGACGCTG…	Firmicutes	Clostridia_1	Clostridiales	Clostridiaceae_1	Arthropod_cluster
ACTCCTACGGGAGGCAGCAGTGAGGAATATTGGTCAATGGACGCAAGTCTGAACCAGCCATGCCGCGTGCAGGAAGACGGCTCTATGAGTTGTAAACTGCTTTTGTACGAGGGTAAACCCTGATACGTGTATCAGGCTGAAAGTATCGTACGAATAAGGATCGGCTAACTCCGTGCCAGCAGCCGCGGTAATACGGAGGATCCAAGCGTTATCCGGATTTATTGGGTTTAAAGGGTGCGTAGGCGGTTTGTTAAGTTAGAGGTGAAATCCCGTGGCTCAACCACGGAACTGCCTCTGATACTGGCAGGCTAGAGAATGGTTGCTGTGGGCGGAATGTGTGGTGTAGCGGTGAAATGCTTAGAGATCACACAGAACACCGATTGCGAAGGCAGCTCACAA…	Bacteroidetes	Bacteroidia	Bacteroidales	Rikenellaceae	Alisitpes_IV
ACTCCTACGGGAGGCAGCAGTGAGGAATATTGGTCAATGGGGGCAACCCTGAACCAGCCATGCCGCGTGCAGGAAGACGGCTCTATGAGTTGTAAACTGCTTTTATACGGGGATAAATCAGAGCACGCGTGCTCTGTTGAAGGTACCGTAAGAATAAGGATCGGCTAACTCCGTGCCAGCAGCCGCGGTAATACGGAGGATCCAAGCGTTATCCGGATTTATTGGGTTTAAAGGGTGCGTAGGCGGCACGGTAAGTTAGCGGTGAAATCTCGGGGCTTAACCCCGAAATTGCCGTTAAAACTGCCGGGCTAGAGATTAGATGCGGTAGGCGGAATGTGTGGTGTAGCGGTGAAATGCTTAGAGATCACACAGAACCCCGATTGCGAAGGCAGCTTACCA…	Bacteroidetes	Bacteroidia	Bacteroidales	Rikenellaceae	Alistipes_II
ACTCCTACGGGAGGCAGCAGTGGGGGATATTGCACAATGGGCGAAAGCCTGATGCAGCGACGCCGCGTGAGGGAAGAAGGTTTTCGGATTGTAAACCTCTGTCTTCGGGGACGATAATGACGGTACCCGAGGAGGAAGCCACGGCTAACTACGTGCCAGCAGCCGCGGTAAAACGTAGGTGGCAAGCGTTGTCCGGAATTACTGGGTGTAAAGGGAGCGCAGGCGGGGTGCCAAGTTGGGCGTGAAAACTATGGGCTCAACCCATAGATTGCGCTCAAAACTGGCGCTCTTGAGTGATGGAGAGGCAGGCGGAATTCCCGGTGTAGCGGTGGAATGCGTAGATATCGGGAGGAACACCAGTGGCGAAGGCGGCCTGCTGGACATTAACTGACGCTGAGG…	Firmicutes	Clostridia_1	Clostridiales	Ruminococcaceae	Termite_cockroach_cluster
ACTCCTACGGGAGGCAGCAGTGGGGAATTTTGCGCAATGGGCGAAAGCCTGACGCAGCAACGCCGCGTGCGGGATGAAGGCCTTCGGGTTGTAAACCGCTTTCAGTAGGGAAGATTATGACGGTACCTACAGAAGAAGCTCCGGCTAACTACGTGCCAGCAGCCGCGGTAATACGTAGGGAGCAAGCGTTATCCGGATTCATTGGGCGTAAAGAGCGCGTAGGCGGCTTGTTAAGCAAGGTGTTAAATCTGAGGGCTCAACCCCCAGCCGCACCTTGAACTGGCAGGCTTGAGTTTGGTAGAGGAAGGTGGAATTCCCAGTGTAGCGGTGGAATGCGCAGATATTGGGAAGAACACCGGTGGCGAAGGCGGCCTTCTGGGCCATAACTGACGCTGAGGC…	Actinobacteria	Actinobacteria	Coriobacteriales	Coriobacteriaceae	Uncultured_10
[truncated: 19,207 more rows]

## Sheet: Supp. Table 14
Supplementary Table 14: Prokaryote abundance of the Macrotermes natalensis gut microbiome.
[truncated: 64 more rows]
[truncated: 5,000 more columns]

## Sheet: Supp. Table 15
Supplemental Table 15. ASVs identified by the Decontam package within dataset. These were in low abundance in mature reproductives, workers, and larvae in the dataset. However, given that the number of 16S copies in mature kings and workers is comparable, and many of the genera identified, such as Alistipies II are known to be core members of the fungus-farming termite microbiome it is unlikely t…
[truncated: 133 more rows]

[truncated: 2 more sheets: Supp. Table 16, Supp. Table 17]
